# Supplementary material for: A modular platform to display multiple hemagglutinin subtypes on a single immunogen
Source: eLife journal article supplement (doi:10.7554/elife.97364), 2024-04-26
Supplement: fig5-data1 [file Figure 5D source data- Negative stain EM 2.pdf › Figure 5D source data- Negative stain EM 2.pdf]

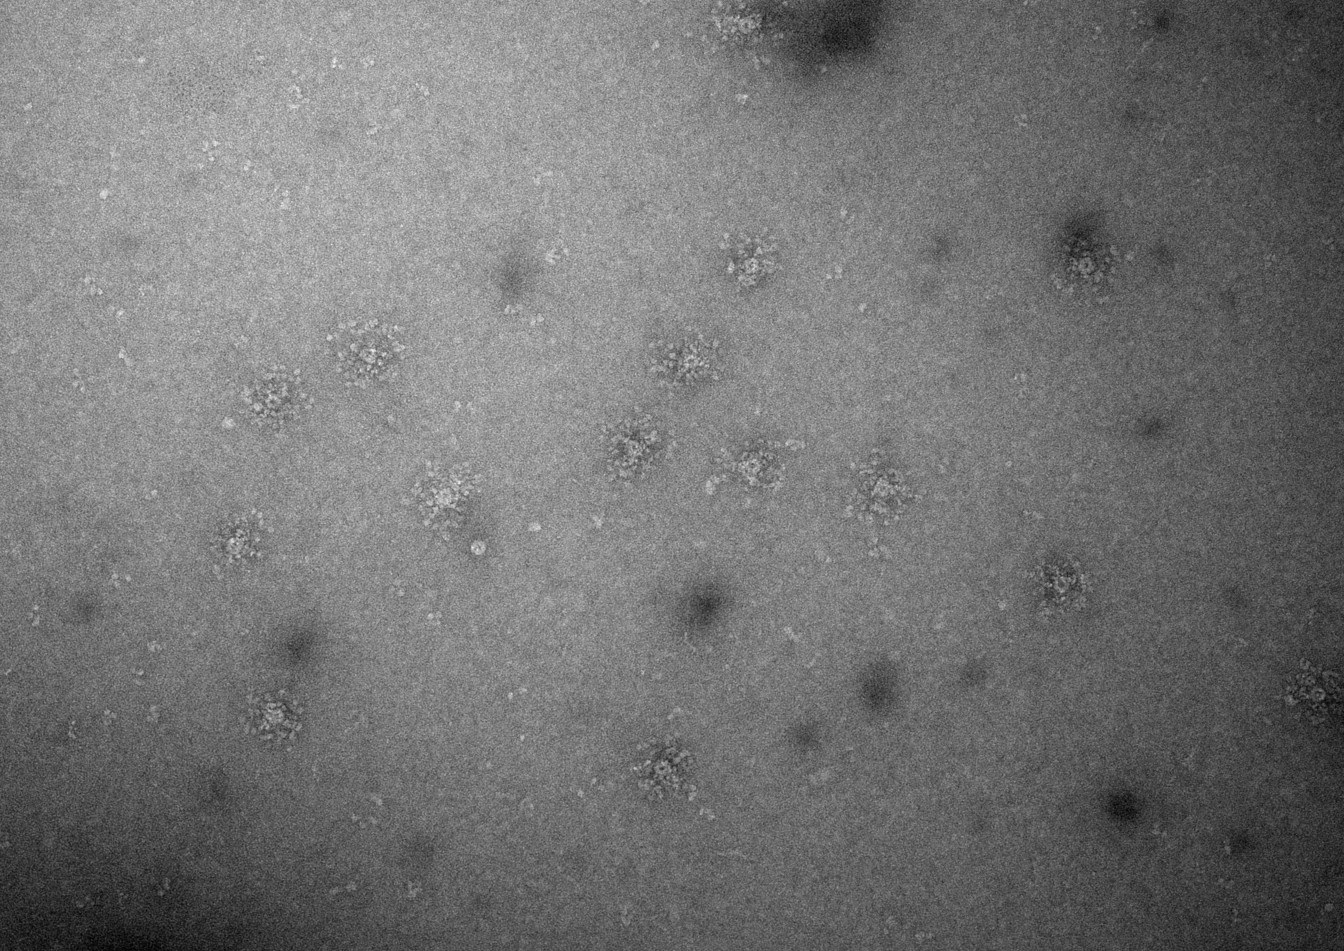

Dana Thornlow\_060723\_#4\_003.tif  
4. WT 2x4mer NP\_20ug/ml

Cal: 0.000143  $\mu\text{m}/\text{pix}$   
15:56 2023-06-07

TEM Mode: Imaging

Camera: NANOSPRT43, Exposure: 600 (ms) x 3 std. frames, Gain: 10, Bin: 1

Gamma: 1.00, No Sharpening, Normal Contrast

---

100 nm

HV=80kV

Direct Mag: 49000 x

AMT Camera System
