# Supplementary material for: A modular platform to display multiple hemagglutinin subtypes on a single immunogen
Source: eLife. 2025 Dec 8;13:RP97364. doi: 10.7554/eLife.97364 (PMC12685301; doi:10.7554/eLife.97364)
Supplement: Figure 2—source data 5. [file elife-97364-fig2-data5.xlsx]

## Sheet: raw data
##BLOCKS= 9
Plate:	WT 3mer	1.3	PlateFormat	Endpoint	Absorbance	Raw	FALSE	1						1	450	1	12	96	1	8
	Temperature(¡C)	1	2	3	4	5	6	7	8	9	10	11	12
	21.5	1.1058	1.0877	1.0454	1.0306	1.0228	1.0156	1.0388	1.0295	1.0692	1.0525	0.3531	0.3954
		1.0379	1.0481	1.017	1.0177	1.0153	1.001	1.0253	1.0225	1.0222	1.0144	0.161	0.1907
		0.9623	0.9577	0.9595	0.965	0.9274	0.9351	0.9586	0.9312	0.9484	0.9391	0.1005	0.1055
		0.7297	0.7145	0.8283	0.8198	0.7197	0.7274	0.7844	0.792	0.7593	0.7753	0.0719	0.077
		0.2347	0.217	0.4341	0.4283	0.2494	0.251	0.357	0.3673	0.3243	0.3296	0.0598	0.0629
		0.0747	0.0742	0.1211	0.1194	0.076	0.078	0.0937	0.0951	0.0904	0.0953	0.0575	0.633
		0.0592	0.0596	0.0677	0.0676	0.0585	0.0584	0.06	0.0629	0.0653	0.0633	0.056	0.0621
		0.0602	0.058	0.062	0.059	0.0577	0.0582	0.0574	0.059	0.0564	0.059	0.0713	0.0677
~End
Plate:	WT 4mer	1.3	PlateFormat	Endpoint	Absorbance	Raw	FALSE	1						1	450	1	12	96	1	8
	Temperature(¡C)	1	2	3	4	5	6	7	8	9	10	11	12
	21.5	1.0932	1.0762	1.0034	0.9943	0.9873	1.0139	1.0463	1.0184	1.0549	1.0558	1.0608	1.1109
		1.053	1.0056	0.9364	0.9555	0.967	0.9526	0.987	0.969	0.9903	0.9967	1.0188	1.0795
		0.9478	0.9262	0.9428	0.9279	0.9138	0.8939	0.9428	0.9645	0.989	0.9569	1.0153	1.0054
		0.7047	0.6527	0.801	0.8119	0.6964	0.6839	0.7665	0.768	0.7488	0.7655	0.761	0.786
		0.2206	0.2038	0.4078	0.4039	0.2572	0.2396	0.3638	0.3583	0.3232	0.3305	0.2956	0.3205
		0.0821	0.0738	0.1227	0.1306	0.0843	0.0807	0.0951	0.0988	0.1131	0.0955	0.0879	0.0979
		0.0654	0.0683	0.0793	0.0901	0.0719	0.0614	0.0639	0.0684	0.0723	0.0668	0.0622	0.0723
		0.0597	0.0618	0.0635	0.0642	0.0632	0.0691	0.0621	0.0619	0.0584	0.0653	0.0576	0.0667
~End
Plate:	WT 5mer	1.3	PlateFormat	Endpoint	Absorbance	Raw	FALSE	1						1	450	1	12	96	1	8
	Temperature(¡C)	1	2	3	4	5	6	7	8	9	10	11	12
	21.5	1.088	1.0442	0.9533	0.9599	0.9771	0.9901	0.9838	1.0021	0.9983	1.015	1.0435	1.052
		1.0209	1.0037	0.948	0.9479	0.9543	0.9501	0.9774	0.9648	0.9721	0.9884	0.981	1.0453
		0.9257	0.9111	0.9326	0.9403	0.9026	0.8942	0.9438	0.9589	0.94	0.9306	0.9562	0.9522
		0.6832	0.6605	0.8032	0.8032	0.6904	0.6897	0.7769	0.7744	0.7492	0.748	0.7255	0.7706
		0.2089	0.2002	0.3972	0.4036	0.2432	0.2338	0.3447	0.3416	0.3073	0.3008	0.2762	0.2928
		0.0712	0.0681	0.1142	0.1139	0.0746	0.0737	0.0902	0.0909	0.09	0.0878	0.0816	0.092
		0.0586	0.0571	0.0652	0.0671	0.0572	0.0578	0.0627	0.0619	0.0651	0.0643	0.0596	0.0633
		0.057	0.0605	0.0619	0.0594	0.0637	0.0578	0.0598	0.0617	0.059	0.0574	0.0628	0.0669
~End
Plate:	WT 6mer	1.3	PlateFormat	Endpoint	Absorbance	Raw	FALSE	1						1	450	1	12	96	1	8
	Temperature(¡C)	1	2	3	4	5	6	7	8	9	10	11	12
	21.5	1.0322	1.0121	0.6305	0.5809	0.8036	0.8272	0.808	0.838	0.9588	0.9697	0.9646	0.9555
		0.9948	0.9768	0.649	0.6549	0.802	0.7984	0.8149	0.8282	0.9332	0.9234	0.9275	0.9363
		0.9395	0.9369	0.6553	0.6525	0.777	0.7539	0.8087	0.8277	0.8955	0.9149	0.9043	0.9286
		0.7807	0.763	0.5893	0.5755	0.4979	0.463	0.7059	0.6692	0.6911	0.6794	0.7095	0.7354
		0.3352	0.3253	0.3074	0.2942	0.1519	0.134	0.2988	0.2914	0.2538	0.262	0.2756	0.284
		0.0943	0.0933	0.0984	0.0968	0.0674	0.0682	0.0867	0.0905	0.0835	0.0825	0.0856	0.0958
		0.0677	0.0629	0.0648	0.0678	0.0588	0.0585	0.0638	0.0632	0.0637	0.0638	0.0621	0.0697
		0.0604	0.0594	0.0584	0.0595	0.0589	0.0634	0.059	0.059	0.0581	0.0592	0.0586	0.0695
~End
Plate:	WT 7mer	1.3	PlateFormat	Endpoint	Absorbance	Raw	FALSE	1						1	450	1	12	96	1	8
	Temperature(¡C)	1	2	3	4	5	6	7	8	9	10	11	12
	21.5	1.0872	1.0718	0.9026	0.9342	0.9726	0.9541	0.9776	0.9568	1.0133	1.0026	1.0171	1.0478
		1.0218	1.0259	0.8894	0.8765	0.9239	0.917	0.9449	0.9345	0.9775	0.964	0.9683	1.0212
		0.9414	0.9289	0.8603	0.8634	0.8649	0.8577	0.9281	0.9305	0.9351	0.9314	0.9485	0.9501
		0.7495	0.7375	0.7654	0.7724	0.6165	0.5898	0.7599	0.7462	0.7217	0.7327	0.7218	0.7411
		0.2712	0.2656	0.3645	0.3687	0.1913	0.1783	0.3149	0.3001	0.277	0.2709	0.2575	0.2677
		0.0829	0.0851	0.1118	0.1185	0.0989	0.0921	0.0904	0.0855	0.088	0.0852	0.0842	0.0932
		0.0643	0.0647	0.0688	0.0706	0.0628	0.063	0.068	0.0626	0.0662	0.0673	0.0676	0.0686
		0.0622	0.064	0.0628	0.061	0.0622	0.0616	0.059	0.0622	0.0597	0.063	0.0622	0.0688
~End
Plate:	WT 8mer	1.3	PlateFormat	Endpoint	Absorbance	Raw	FALSE	1						1	450	1	12	96	1	8
	Temperature(¡C)	1	2	3	4	5	6	7	8	9	10	11	12
	21.5	1.045	1.0094	0.7239	0.6832	0.8498	0.8427	0.8345	0.8389	0.9318	0.943	0.987	0.9947
		1.0008	0.9729	0.7458	0.7381	0.8258	0.8258	0.8323	0.8311	0.908	0.9161	0.9429	0.9734
		0.9212	0.8726	0.7063	0.708	0.7432	0.7365	0.7931	0.8206	0.8622	0.8878	0.8571	0.9244
		0.7423	0.7232	0.6568	0.6516	0.4925	0.4607	0.6629	0.6915	0.6727	0.6648	0.6807	0.7188
		0.2845	0.2749	0.3029	0.2831	0.1442	0.1302	0.2633	0.2611	0.2293	0.2224	0.2268	0.2436
		0.0869	0.0831	0.095	0.0924	0.068	0.0659	0.0823	0.0817	0.0792	0.0771	0.0772	0.0872
		0.0645	0.0675	0.0688	0.0658	0.0598	0.0593	0.0633	0.0614	0.0642	0.0647	0.0691	0.0729
		0.0616	0.0613	0.0645	0.0672	0.06	0.059	0.0588	0.061	0.0615	0.0599	0.0597	0.0721
~End
Plate:	3mer / 4mer	1.3	PlateFormat	Endpoint	Absorbance	Raw	FALSE	1						1	450	1	12	96	1	8
	Temperature(¡C)	1	2	3	4	5	6	7	8	9	10	11	12
	21.5	1.012	0.0836	0.1298	0.1303	0.1135	0.1097	0.0883	0.0889	0.1412	0.189	0.1765	0.1924
		0.935	0.0592	0.0596	0.0619	0.0584	0.0561	0.0585	0.0589	0.0601	0.0604	0.0642	0.0799
		0.6826	0.0568	0.058	0.0579	0.0556	0.0591	0.058	0.0585	0.0605	0.0601	0.0609	0.0687
		0.2001	0.0562	0.0566	0.0567	0.0586	0.0586	0.0579	0.0577	0.0581	0.0593	0.0596	0.0661
		0.0741	0.0558	0.0559	0.057	0.0566	0.0578	0.0594	0.0583	0.0588	0.0573	0.0584	0.0705
		0.0642	0.0601	0.0578	0.0559	0.0567	0.0584	0.0579	0.0583	0.0602	0.0587	0.0591	0.0643
		0.0591	0.0574	0.0579	0.0582	0.0583	0.0585	0.0592	0.0584	0.0596	0.0599	0.0591	0.0665
		0.0625	0.0597	0.0582	0.06	0.0612	0.0614	0.0614	0.0604	0.0625	0.0613	0.0599	0.0674
~End
Plate:	5mer / 6mer	1.3	PlateFormat	Endpoint	Absorbance	Raw	FALSE	1						1	450	1	12	96	1	8
	Temperature(¡C)	1	2	3	4	5	6	7	8	9	10	11	12
	21.5	1.0094	0.9904	0.1442	0.1415	0.1143	0.1237	0.6792	0.6738	0.6421	0.6379	0.1704	0.1758
		0.9761	0.9484	0.063	0.0669	0.0634	0.0653	0.6926	0.6637	0.5786	0.5957	0.0745	0.0732
		0.9195	0.8891	0.0592	0.0636	0.0618	0.0602	0.6686	0.6574	0.5449	0.5696	0.0832	0.0676
		0.7475	0.7273	0.061	0.0649	0.0573	0.0564	0.5961	0.5347	0.3266	0.3299	0.0634	0.0644
		0.3113	0.2992	0.0575	0.0636	0.0584	0.0595	0.2274	0.2187	0.1073	0.101	0.0602	0.0675
		0.0897	0.0871	0.0569	0.0577	0.0577	0.0573	0.0796	0.078	0.064	0.0633	0.0602	0.0654
		0.062	0.0607	0.0585	0.0619	0.0634	0.0644	0.0621	0.0613	0.0601	0.0632	0.0597	0.0656
		0.0597	0.0578	0.057	0.0572	0.0577	0.0566	0.0564	0.0602	0.0587	0.0598	0.0606	0.066
~End
Plate:	7mer / 8mer	1.3	PlateFormat	Endpoint	Absorbance	Raw	FALSE	1						1	450	1	12	96	1	8
	Temperature(¡C)	1	2	3	4	5	6	7	8	9	10	11	12
	21.5	0.9765	0.9306	0.849	0.841	0.4811	0.4912	0.8305	0.8316	0.7841	0.7895	0.9513	0.9626
		0.927	0.9293	0.8348	0.8289	0.4452	0.433	0.8343	0.8395	0.7791	0.7732	0.8834	0.8938
		0.9158	0.9167	0.7776	0.7818	0.2226	0.2204	0.8617	0.8684	0.7358	0.7223	0.8282	0.8653
		0.7311	0.7075	0.4356	0.4277	0.0824	0.0863	0.6781	0.6761	0.3813	0.3559	0.4723	0.4485
		0.277	0.2701	0.1167	0.1176	0.0643	0.0656	0.2429	0.245	0.1067	0.1018	0.1273	0.1332
		0.0862	0.0857	0.0657	0.0648	0.0615	0.0626	0.0811	0.0836	0.0633	0.0634	0.0677	0.0758
		0.0669	0.0651	0.0632	0.0605	0.0624	0.061	0.0662	0.0658	0.0609	0.0622	0.0619	0.0671
		0.0667	0.0598	0.0673	0.0599	0.0614	0.0615	0.0602	0.0608	0.0605	0.0605	0.0619	0.0672
~End
Original Filename: 20230207 3-8mer ELISA slow TMB; Date Last Saved: 2/7/2023 7:02:40 PM

## Sheet: Sheet1
	S5V2-29	5J8	32D6	2G1	K03.12	P2-D9	H5.3	H7.167	H1209
3mer	2.302e-05	8.175e-06	1.971e-05	1.144e-05	1.39e-05	-4.507e-07	0.0002484	Unstable	Unstable
Kd	2.042e-05	6.769e-06	1.732e-05	9.129e-06	1.154e-05	-3.941e-06	???	(Very wide)	(Very wide)
	2.592e-05	9.93e-06	2.239e-05	1.444e-05	1.677e-05	-1.109e-07
4mer	2.709e-05	8.455e-06	2.007e-05	1.138e-05	1.469e-05	1.727e-05	Unstable	Unstable	Unstable
Kd	2.239e-05	7.748e-06	1.782e-05	9.412e-06	1.24e-05	1.399e-05	(Very wide)	(Very wide)	(Very wide)
	3.262e-05	9.235e-06	2.257e-05	1.383e-05	1.742e-05	2.129e-05
5mer	2.613e-05	8.369e-06	1.963e-05	1.174e-05	1.479e-05	1.719e-05	1.388e-05	Unstable	Unstable
Kd	2.212e-05	7.734e-06	1.824e-05	1.047e-05	1.326e-05	1.415e-05	1.178e-05	(Very wide)	(Very wide)
	3.076e-05	9.064e-06	2.113e-05	1.318e-05	1.65e-05	2.086e-05	1.638e-05
6mer	1.268e-05	7.528e-06	3.89e-05	1.128e-05	1.86e-05	1.569e-05	1.284e-05	4.902e-05	Unstable
Kd	1.121e-05	6.444e-06	3.426e-05	9.896e-06	1.693e-05	1.422e-05	1.039e-05	4.311e-05	(Very wide)
	1.437e-05	8.82e-06	4.411e-05	1.287e-05	2.043e-05	1.731e-05	1.592e-05	5.57e-05
7mer	1.82e-05	8.389e-06	2.982e-05	1.323e-05	1.73e-05	1.9e-05	1.6e-05	5.535e-05	0.0008995
Kd	1.555e-05	7.698e-06	2.673e-05	1.215e-05	1.619e-05	1.654e-05	1.417e-05	5.166e-05	0.0008231
	2.128e-05	9.149e-06	3.321e-05	1.441e-05	1.849e-05	2.179e-05	1.808e-05	5.93e-05	0.0009846
8mer	1.618e-05	9.006e-06	4.146e-05	1.328e-05	2.018e-05	1.983e-05	1.597e-05	6.732e-05	5.494e-05
Kd	1.284e-05	7.458e-06	3.622e-05	1.193e-05	1.878e-05	1.61e-05	1.365e-05	5.936e-05	4.751e-05
	2.039e-05	1.092e-05	4.741e-05	1.48e-05	2.167e-05	2.436e-05	1.867e-05	7.641e-05	6.352e-05
6mer	0.0001302	5.313e-05	0.0001027	5.33e-05	6.701e-05	0.0001334	0.0001929	0.000123	1.975e-08
8mer	0.0001496	4.674e-05	0.0001164	5.81e-05	8.82e-05	0.0001177	0.0003225	0.0001948	0.0002374
ng/mL	S5V2-29	5J8	32D6	2G1	3E5	P2-D9	H5.3	H7.167	H1209	Error (+/-)
3mer	23.02	8.175	19.71	11.44	13.9	-0.4507	248.4	#VALUE!	#VALUE!
Kd	20.42	6.769	17.32	9.129	11.54	-3.941	#VALUE!	#VALUE!	#VALUE!	2.6	1.406	2.39	2.311	2.36	3.4903	#VALUE!	#VALUE!	#VALUE!
	25.92	9.93	22.39	14.44	16.77	-0.1109	0	0	0	2.9	1.755	2.68	3	2.87	0.3398	-248.4	#VALUE!	#VALUE!
4mer	27.09	8.455	20.07	11.38	14.69	17.27	#VALUE!	#VALUE!	#VALUE!
Kd	22.39	7.748	17.82	9.412	12.4	13.99	#VALUE!	#VALUE!	#VALUE!	4.7	0.707	2.25	1.968	2.29	3.28	#VALUE!	#VALUE!	#VALUE!
	32.62	9.235	22.57	13.83	17.42	21.29	0	0	0	5.53	0.78	2.5	2.45	2.73	4.02	#VALUE!	#VALUE!	#VALUE!
5mer	26.13	8.369	19.63	11.74	14.79	17.19	13.88	#VALUE!	#VALUE!
Kd	22.12	7.734	18.24	10.47	13.26	14.15	11.78	#VALUE!	#VALUE!	4.01	0.635	1.39	1.27	1.53	3.04	2.1	#VALUE!	#VALUE!
	30.76	9.064	21.13	13.18	16.5	20.86	16.38	0	0	4.63	0.695	1.5	1.44	1.71	3.67	2.5	#VALUE!	#VALUE!
6mer	12.68	7.528	38.9	11.28	18.6	15.69	12.84	49.02	#VALUE!
Kd	11.21	6.444	34.26	9.896	16.93	14.22	10.39	43.11	#VALUE!	1.47	1.084	4.64	1.384	1.67	1.47	2.45	5.91	#VALUE!
	14.37	8.82	44.11	12.87	20.43	17.31	15.92	55.7	0	1.69	1.292	5.21	1.59	1.83	1.62	3.08	6.68	#VALUE!
7mer	18.2	8.389	29.82	13.23	17.3	19	16	55.35	899.5
Kd	15.55	7.698	26.73	12.15	16.19	16.54	14.17	51.66	823.1	2.65	0.691	3.09	1.08	1.11	2.46	1.83	3.69	76.4
	21.28	9.149	33.21	14.41	18.49	21.79	18.08	59.3	984.6	3.08	0.76	3.39	1.18	1.19	2.79	2.08	3.95	85.1
8mer	16.18	9.006	41.46	13.28	20.18	19.83	15.97	67.32	54.94
Kd	12.84	7.458	36.22	11.93	18.78	16.1	13.65	59.36	47.51	3.34	1.548	5.24	1.35	1.4	3.73	2.32	7.96	7.43
	20.39	10.92	47.41	14.8	21.67	24.36	18.67	76.41	63.52	4.21	1.914	5.95	1.52	1.49	4.53	2.7	9.09	8.58
MW	146435	144959	154224	145684	147367	146973	144422	147610	147876
nM	S5V2-29	5J8	32D6	2G1	3E5	P2-D9	H5.3	H7.167	H1209	Error (+/-)
3mer	0.157203	0.0563953	0.127801	0.0785263	0.0943222	-0.00306655	1.71996	#VALUE!	#VALUE!
	0.139448	0.046696	0.112304	0.0626632	0.0783077	-0.0268144	#VALUE!	#VALUE!	#VALUE!	0.0177553	0.00969931	0.0154969	0.0158631	0.0160144	0.0237479	#VALUE!	#VALUE!	#VALUE!
	0.177007	0.0685022	0.145178	0.0991189	0.113797	-0.00075456	0	0	0	0.019804	0.0121069	0.0173773	0.0205926	0.0194752	0.00231199	-1.71996	#VALUE!	#VALUE!
4mer	0.184997	0.0583269	0.130135	0.0781145	0.0996829	0.117504	#VALUE!	#VALUE!	#VALUE!
	0.152901	0.0534497	0.115546	0.0646058	0.0841435	0.0951875	#VALUE!	#VALUE!	#VALUE!	0.0320962	0.00487725	0.0145891	0.0135087	0.0155394	0.022317	#VALUE!	#VALUE!	#VALUE!
	0.222761	0.0637078	0.146345	0.0949318	0.118208	0.144856	0	0	0	0.0377642	0.00538084	0.0162102	0.0168173	0.0185251	0.0273519	#VALUE!	#VALUE!	#VALUE!
5mer	0.178441	0.0577336	0.127282	0.0805856	0.100361	0.11696	0.096107	#VALUE!	#VALUE!
	0.151057	0.0533531	0.118269	0.0718681	0.0899793	0.0962761	0.0815664	#VALUE!	#VALUE!	0.0273842	0.00438056	0.00901284	0.00871752	0.0103822	0.0206841	0.0145407	#VALUE!	#VALUE!
	0.210059	0.0625281	0.137008	0.09047	0.111965	0.141931	0.113417	0	0	0.0316181	0.00479447	0.00972609	0.00988443	0.0116037	0.0249706	0.0173103	#VALUE!	#VALUE!
6mer	0.0865914	0.051932	0.25223	0.0774281	0.126215	0.106754	0.0889059	0.332092	#VALUE!
	0.0765528	0.044454	0.222144	0.067928	0.114883	0.0967524	0.0719418	0.292054	#VALUE!	0.0100386	0.00747799	0.030086	0.00950004	0.0113322	0.0100018	0.0169641	0.040038	#VALUE!
	0.0981323	0.0608449	0.286012	0.0883421	0.138633	0.117777	0.110232	0.377346	0	0.011541	0.00891288	0.033782	0.0109141	0.012418	0.0110224	0.0213263	0.0452544	#VALUE!
7mer	0.124287	0.0578716	0.193355	0.0908132	0.117394	0.129275	0.110786	0.374975	6.08278
	0.106191	0.0531047	0.173319	0.0833999	0.109862	0.112538	0.098115	0.349977	5.56613	0.0180968	0.00476687	0.0200357	0.00741333	0.0075322	0.0167378	0.0126712	0.0249983	0.516647
	0.145321	0.0631145	0.215336	0.098913	0.125469	0.148258	0.125188	0.401735	6.65826	0.0210332	0.00524287	0.021981	0.00809974	0.00807506	0.0189831	0.0144022	0.0267597	0.57548
8mer	0.110493	0.062128	0.268829	0.0911565	0.136937	0.134923	0.110578	0.456067	0.371526
	0.087684	0.0514491	0.234853	0.0818898	0.127437	0.109544	0.0945145	0.402141	0.321282	0.0228088	0.0106789	0.0339765	0.00926666	0.00950007	0.0253788	0.016064	0.0539259	0.0502446
	0.139243	0.0753317	0.307409	0.10159	0.147048	0.165745	0.129274	0.517648	0.429548	0.02875	0.0132038	0.0385802	0.0104336	0.0101108	0.030822	0.0186952	0.0615812	0.0580214
