# Supplementary material for: A modular platform to display multiple hemagglutinin subtypes on a single immunogen
Source: eLife. 2025 Dec 8;13:RP97364. doi: 10.7554/eLife.97364 (PMC12685301; doi:10.7554/eLife.97364)
Supplement: Figure 3—figure supplement 1—source data 1. [file elife-97364-fig3-figsupp1-data1.xlsx]

## Sheet: Plate Format
	3mer								4mer						4mer				5mer
plate 1	1	2	3	4	5	6	7	8	9	10	11	12		plate 2	1	2	3	4	5	6	7	8	9	10	11	12
A	377 = 054	378	379	UR	LR	UL	LL	O	380	381	382	UR		A	LR	UL	LL	O	383	384 = 053	385 = 052	UR	LR	UL	LL	O
B														B
C														C
D														D
E														E
F														F
G														G
H	No primary	No primary	No primary	No primary	No primary	No primary	No primary	No primary	No primary	No primary	No primary	No primary		H	No primary	No primary	No primary	No primary	No primary	No primary	No primary	No primary	No primary	No primary	No primary	No primary
	6mer								7mer						7mer				8mer
plate 3	1	2	3	4	5	6	7	8	9	10	11	12		plate 4	1	2	3	4	5	6	7	8	9	10	11	12
A	386	387	388	UR	LR	UL	LL	O	389	390 = 055	391 = 056	UR		A	LR	UL	LL	O	392	393	394	UR	LR	UL	LL	O
B														B
C														C
D														D
E														E
F														F
G														G
H	No primary	No primary	No primary	No primary	No primary	No primary	No primary	No primary	No primary	No primary	No primary	No primary		H	No primary	No primary	No primary	No primary	No primary	No primary	No primary	No primary	No primary	No primary	No primary	No primary
	BOAS NP					Mix					NP Control
plate 5	1	2	3	4	5	6	7	8	9	10	11	12
A	UR	LR	UL	LL	O	UR	LR	UL	LL	O	UR	LR
B
C
D
E
F
G
H	No primary	No primary	No primary	No primary	No primary	No primary	No primary	No primary	No primary	No primary	No primary	No primary
d28 serum only!

## Sheet: raw data 1
##BLOCKS= 21
Plate:	H1	1.3	PlateFormat	Endpoint	Absorbance	Raw	FALSE	1						1	450	1	12	96	1	8
	Temperature(¡C)	1	2	3	4	5	6	7	8	9	10	11	12
	23	0.7566	0.6238	0.5758	0.7267	0.7223	0.6502	0.6053	0.8394	0.688	0.7475	0.3891	0.5832
		0.4752	0.2614	0.2707	0.391	0.3712	0.2956	0.2644	0.6592	0.4233	0.4952	0.1764	0.2446
		0.1299	0.0738	0.0911	0.1259	0.1081	0.0872	0.0819	0.2374	0.1288	0.1584	0.0706	0.0843
		0.0615	0.052	0.0549	0.0585	0.0563	0.053	0.0534	0.074	0.058	0.0618	0.0531	0.0547
		0.0517	0.0515	0.0529	0.0536	0.0533	0.0534	0.0534	0.0546	0.0526	0.0532	0.0534	0.0568
		0.052	0.0503	0.0505	0.0501	0.0527	0.0515	0.052	0.0525	0.0522	0.0523	0.0523	0.0522
		0.0532	0.0508	0.0521	0.0524	0.0518	0.0524	0.0516	0.0529	0.0507	0.0526	0.0534	0.0533
		0.0542	0.0513	0.0525	0.0524	0.0533	0.0507	0.0517	0.0531	0.0529	0.0528	0.0523	0.0528
~End
Plate:	H2	1.3	PlateFormat	Endpoint	Absorbance	Raw	FALSE	1						1	450	1	12	96	1	8
	Temperature(¡C)	1	2	3	4	5	6	7	8	9	10	11	12
	23	0.9082	0.628	0.7615	0.7416	0.8404	0.8588	0.74	0.8558	0.808	0.7422	0.7449	0.5869
		0.6507	0.2028	0.3815	0.3824	0.5908	0.6914	0.4493	0.6278	0.4918	0.5809	0.5229	0.2931
		0.2129	0.0673	0.1088	0.1097	0.1995	0.2924	0.1294	0.2263	0.1354	0.2679	0.1791	0.0952
		0.0731	0.052	0.0585	0.0559	0.0649	0.0874	0.056	0.071	0.0576	0.0794	0.0638	0.054
		0.0526	0.0485	0.0494	0.0498	0.0499	0.0553	0.051	0.0505	0.0498	0.0522	0.0502	0.0501
		0.048	0.0495	0.049	0.0489	0.0488	0.0489	0.0489	0.0508	0.0484	0.0478	0.0493	0.0495
		0.049	0.0498	0.0491	0.0488	0.0493	0.0488	0.0492	0.0485	0.0485	0.0488	0.0482	0.0489
		0.0491	0.048	0.0487	0.0503	0.0491	0.0489	0.0481	0.0491	0.0492	0.0483	0.0496	0.0501
~End
Plate:	H3	1.3	PlateFormat	Endpoint	Absorbance	Raw	FALSE	1						1	450	1	12	96	1	8
	Temperature(¡C)	1	2	3	4	5	6	7	8	9	10	11	12
	23	0.7939	0.7259	0.7824	0.7798	0.8668	0.8222	0.5895	0.8621	0.7959	0.8468	0.8669	0.793
		0.4982	0.344	0.4779	0.4868	0.776	0.5926	0.2318	0.7107	0.5326	0.783	0.6998	0.5426
		0.1542	0.1064	0.1506	0.1577	0.4376	0.2382	0.081	0.3306	0.1692	0.4916	0.3263	0.2092
		0.0662	0.0619	0.064	0.0652	0.124	0.0792	0.0536	0.0952	0.0655	0.1481	0.1	0.0738
		0.056	0.0582	0.0562	0.0523	0.0593	0.054	0.0511	0.0553	0.052	0.0622	0.0569	0.0602
		0.0518	0.0536	0.0518	0.0508	0.0541	0.0531	0.0522	0.0526	0.0516	0.0543	0.0519	0.0524
		0.0532	0.0523	0.0517	0.0505	0.0533	0.0514	0.0524	0.0527	0.051	0.0517	0.0527	0.0514
		0.0517	0.0514	0.0508	0.0511	0.0505	0.0509	0.0503	0.0509	0.0508	0.0514	0.0506	0.0524
~End
Plate:	H5	1.3	PlateFormat	Endpoint	Absorbance	Raw	FALSE	1						1	450	1	12	96	1	8
	Temperature(¡C)	1	2	3	4	5	6	7	8	9	10	11	12
	23	0.4466	0.1398	0.2503	0.3615	0.5519	0.4815	0.7241	0.3875	0.5356	0.5128	0.6213	0.421
		0.1804	0.0655	0.0884	0.1484	0.2127	0.1353	0.3358	0.1094	0.1978	0.3786	0.3474	0.201
		0.069	0.0525	0.055	0.0638	0.076	0.0607	0.094	0.0577	0.07	0.1605	0.1172	0.0914
		0.055	0.0513	0.0498	0.0498	0.0514	0.0491	0.0527	0.0493	0.0508	0.0653	0.0576	0.0566
		0.0499	0.0475	0.0476	0.0481	0.0486	0.0478	0.0476	0.0489	0.0486	0.0496	0.0486	0.0512
		0.0466	0.0495	0.0465	0.047	0.048	0.0488	0.0487	0.0484	0.0476	0.0488	0.0486	0.0519
		0.0475	0.0486	0.048	0.0483	0.0494	0.049	0.0489	0.048	0.0483	0.0481	0.0478	0.0515
		0.0518	0.049	0.0481	0.0484	0.0491	0.0488	0.0487	0.0497	0.0499	0.0495	0.0508	0.0499
~End
Plate:	H7	1.3	PlateFormat	Endpoint	Absorbance	Raw	FALSE	1						1	450	1	12	96	1	8
	Temperature(¡C)	1	2	3	4	5	6	7	8	9	10	11	12
	23	0.2762	0.0887	0.0866	0.0941	0.2239	0.2249	0.0656	0.0781	0.4448	0.4103	0.2577	0.0852
		0.1241	0.0533	0.0524	0.0533	0.0849	0.0951	0.0501	0.0538	0.1794	0.1336	0.0972	0.0569
		0.061	0.0499	0.05	0.05	0.0564	0.0566	0.0494	0.0504	0.0685	0.0608	0.0576	0.0515
		0.0521	0.0502	0.0519	0.0506	0.0506	0.05	0.0504	0.0498	0.0511	0.0512	0.0518	0.0521
		0.0525	0.0511	0.0487	0.05	0.0498	0.0498	0.0508	0.0499	0.05	0.0502	0.0507	0.0523
		0.0512	0.051	0.0518	0.0499	0.0506	0.0504	0.0502	0.05	0.0498	0.05	0.0504	0.0519
		0.0543	0.0515	0.0501	0.0503	0.0507	0.0505	0.0504	0.0498	0.0504	0.0517	0.0514	0.0541
		0.0535	0.0505	0.0506	0.05	0.0505	0.0503	0.0494	0.0504	0.0508	0.0502	0.0504	0.0518
~End
Plate:	H9	1.3	PlateFormat	Endpoint	Absorbance	Raw	FALSE	1						1	450	1	12	96	1	8
	Temperature(¡C)	1	2	3	4	5	6	7	8	9	10	11	12
	23	0.4747	0.0688	0.0634	0.1186	0.6266	0.5713	0.1436	0.068	0.6868	0.1121	0.863	0.2819
		0.1969	0.0506	0.0491	0.0603	0.2152	0.2383	0.0648	0.0524	0.3219	0.0579	0.5739	0.0886
		0.0689	0.0492	0.05	0.0509	0.0678	0.0806	0.0527	0.0528	0.0903	0.0504	0.2057	0.0553
		0.0536	0.0509	0.0504	0.0506	0.051	0.0524	0.0498	0.0493	0.0548	0.0508	0.0701	0.0519
		0.053	0.0514	0.0515	0.0522	0.0502	0.0507	0.0513	0.0544	0.0513	0.0506	0.0532	0.0519
		0.0517	0.0499	0.0614	0.0504	0.0508	0.0511	0.0506	0.0519	0.0512	0.052	0.0572	0.0525
		0.0524	0.051	0.051	0.0511	0.051	0.0507	0.0559	0.0504	0.0507	0.0527	0.0534	0.0545
		0.0529	0.0508	0.0513	0.051	0.0518	0.0508	0.051	0.0513	0.0514	0.0513	0.0536	0.0514
~End
Plate:	B Mal	1.3	PlateFormat	Endpoint	Absorbance	Raw	FALSE	1						1	450	1	12	96	1	8
	Temperature(¡C)	1	2	3	4	5	6	7	8	9	10	11	12
	23	0.0755	0.072	0.066	0.0698	0.1796	0.0669	0.0638	0.0781	0.0722	0.0968	0.2507	0.0864
		0.0592	0.0567	0.0569	0.0585	0.0724	0.0553	0.0565	0.0604	0.0584	0.0702	0.081	0.0628
		0.0568	0.0549	0.0557	0.0555	0.0577	0.0533	0.0553	0.0562	0.0563	0.0588	0.0603	0.0622
		0.0585	0.0569	0.0552	0.0555	0.0551	0.0545	0.0548	0.0549	0.0558	0.0556	0.0561	0.0566
		0.0596	0.0552	0.0553	0.055	0.0549	0.0549	0.0551	0.0544	0.0542	0.0549	0.0607	0.0563
		0.0564	0.0565	0.0553	0.0554	0.0556	0.0555	0.0551	0.0558	0.0553	0.0552	0.0554	0.0564
		0.0588	0.0556	0.056	0.0576	0.0561	0.0551	0.0559	0.0551	0.0554	0.0584	0.0582	0.0564
		0.0573	0.0557	0.0556	0.0562	0.0578	0.055	0.0545	0.0558	0.0557	0.0554	0.057	0.0584
~End
Plate:	H1	1.3	PlateFormat	Endpoint	Absorbance	Raw	FALSE	1						1	450	1	12	96	1	8
	Temperature(¡C)	1	2	3	4	5	6	7	8	9	10	11	12
	23	0.7754	0.5458	0.6894	0.6364	0.5994	0.8959	0.7302	0.8498	0.797	0.9198	0.7597	0.9156
		0.339	0.1738	0.3097	0.2509	0.3038	0.6221	0.3329	0.5584	0.5052	0.5497	0.415	0.6218
		0.0952	0.0638	0.0872	0.0777	0.0939	0.1858	0.0938	0.167	0.1597	0.1524	0.114	0.1813
		0.0588	0.0562	0.0539	0.0539	0.0546	0.0656	0.0555	0.0641	0.0642	0.0636	0.0594	0.0753
		0.0624	0.051	0.0544	0.0526	0.0509	0.0552	0.0522	0.0524	0.0524	0.0528	0.0528	0.0588
		0.053	0.0525	0.0518	0.0507	0.0649	0.0514	0.0508	0.0518	0.0512	0.0514	0.0567	0.056
		0.0508	0.0494	0.0522	0.0533	0.0525	0.0516	0.0509	0.0504	0.0503	0.0518	0.052	0.0524
		0.0513	0.0493	0.0504	0.0536	0.0522	0.0496	0.0505	0.0522	0.05	0.0504	0.0512	0.0523
~End
Plate:	H2	1.3	PlateFormat	Endpoint	Absorbance	Raw	FALSE	1						1	450	1	12	96	1	8
	Temperature(¡C)	1	2	3	4	5	6	7	8	9	10	11	12
	23	0.6346	0.915	0.8777	0.8123	0.4731	0.8949	1.6024	0.8538	0.8906	0.8747	0.93	0.761
		0.2118	0.5818	0.5777	0.4949	0.1787	0.6611	0.5764	0.7226	0.6841	0.686	0.7958	0.6489
		0.0685	0.1821	0.1809	0.1462	0.0634	0.241	0.184	0.3446	0.2713	0.2704	0.4315	0.3422
		0.0508	0.0652	0.0631	0.0593	0.0498	0.0696	0.0641	0.086	0.0797	0.0797	0.1301	0.1094
		0.0496	0.0524	0.0497	0.0496	0.0505	0.0502	0.0506	0.0552	0.0552	0.0524	0.059	0.0634
		0.0499	0.0483	0.048	0.0473	0.0485	0.0487	0.0485	0.0502	0.049	0.0495	0.0523	0.0513
		0.0507	0.0479	0.0449	0.0482	0.0486	0.048	0.0474	0.0466	0.0484	0.0487	0.0489	0.0512
		0.1224	0.053	0.049	0.05	0.0495	0.0489	0.0482	0.049	0.0485	0.049	0.0498	0.0494
~End
Plate:	H3	1.3	PlateFormat	Endpoint	Absorbance	Raw	FALSE	1						1	450	1	12	96	1	8
	Temperature(¡C)	1	2	3	4	5	6	7	8	9	10	11	12
	23	0.8834	0.9186	0.8629	0.8875	0.7159	0.9236	0.8781	0.8635	0.9182	1.1149	0.9623	0.86
		0.4599	0.5745	0.6621	0.723	0.3911	0.653	0.595	0.7066	0.7741	0.7495	0.7638	0.6108
		0.1304	0.1821	0.2742	0.329	0.1154	0.2457	0.2161	0.3112	0.4098	0.3438	0.3843	0.2485
		0.0627	0.0675	0.0853	0.1013	0.0574	0.076	0.0719	0.088	0.1191	0.0982	0.1184	0.0858
		0.0562	0.0538	0.056	0.0608	0.0525	0.0556	0.055	0.0568	0.0605	0.0586	0.0634	0.0579
		0.0541	0.0523	0.0546	0.0542	0.0521	0.0521	0.052	0.0532	0.0551	0.053	0.0541	0.0556
		0.0538	0.0534	0.054	0.0546	0.0523	0.053	0.0525	0.0522	0.053	0.0538	0.0543	0.0529
		0.0533	0.0529	0.0527	0.0524	0.0531	0.0522	0.0527	0.0532	0.0525	0.0522	0.0531	0.0538
~End
Plate:	H5	1.3	PlateFormat	Endpoint	Absorbance	Raw	FALSE	1						1	450	1	12	96	1	8
	Temperature(¡C)	1	2	3	4	5	6	7	8	9	10	11	12
	23	0.366	0.6876	0.5576	0.4394	0.2494	0.9376	0.8861	0.8439	0.8997	0.9064	0.8966	0.8571
		0.1343	0.3157	0.2104	0.2036	0.1095	0.6467	0.5773	0.56	0.8048	0.7297	0.6941	0.6828
		0.0638	0.1019	0.0713	0.089	0.0586	0.2214	0.1928	0.1899	0.4495	0.3177	0.309	0.3185
		0.051	0.0552	0.0503	0.0561	0.0498	0.0712	0.0655	0.068	0.131	0.089	0.1041	0.0936
		0.0493	0.0491	0.0491	0.0502	0.0479	0.0514	0.0513	0.0514	0.06	0.0577	0.0583	0.0558
		0.0481	0.0474	0.0483	0.0491	0.0489	0.0483	0.0489	0.0499	0.0519	0.0496	0.0516	0.0514
		0.0444	0.0479	0.0486	0.052	0.0489	0.0492	0.0521	0.0494	0.0504	0.0504	0.0512	0.051
		0.0496	0.0482	0.0487	0.0489	0.0497	0.0486	0.0494	0.0496	0.0495	0.0499	0.0499	0.05
~End
Plate:	H7	1.3	PlateFormat	Endpoint	Absorbance	Raw	FALSE	1						1	450	1	12	96	1	8
	Temperature(¡C)	1	2	3	4	5	6	7	8	9	10	11	12
	23	0.0957	0.1246	0.1826	0.1996	0.095	0.4264	0.5131	0.5777	0.323	0.2353	0.2839	0.3663
		0.056	0.0613	0.0993	0.0866	0.059	0.1232	0.1732	0.3459	0.1659	0.093	0.0995	0.1742
		0.0518	0.053	0.06	0.0564	0.0525	0.0592	0.0677	0.1037	0.0709	0.0563	0.0595	0.0673
		0.0532	0.0521	0.0526	0.0532	0.0534	0.0534	0.0536	0.0579	0.0546	0.053	0.0538	0.0565
		0.0531	0.053	0.0528	0.0528	0.052	0.0549	0.0539	0.0536	0.0535	0.0584	0.054	0.0543
		0.0546	0.0541	0.0541	0.0535	0.0529	0.0528	0.0529	0.0541	0.0531	0.0534	0.0543	0.0548
		0.0525	0.0531	0.0528	0.054	0.0539	0.0529	0.0533	0.053	0.0533	0.0546	0.0544	0.0536
		0.0533	0.0523	0.0537	0.0533	0.0536	0.0531	0.0527	0.0544	0.0539	0.0559	0.0561	0.0538
~End
Plate:	H9	1.3	PlateFormat	Endpoint	Absorbance	Raw	FALSE	1						1	450	1	12	96	1	8
	Temperature(¡C)	1	2	3	4	5	6	7	8	9	10	11	12
	23	0.0714	0.0857	0.2288	0.5746	0.0697	0.4069	0.6612	0.4658	0.184	0.1047	0.2384	0.0925
		0.0506	0.0518	0.08	0.2248	0.0528	0.1108	0.3017	0.1914	0.0701	0.0559	0.0681	0.0567
		0.0496	0.0497	0.052	0.0741	0.0502	0.0568	0.0876	0.067	0.0519	0.0509	0.0522	0.0523
		0.0506	0.0522	0.051	0.0539	0.0506	0.0504	0.0541	0.0523	0.0504	0.0506	0.0506	0.0527
		0.052	0.051	0.0515	0.0516	0.0507	0.0514	0.0518	0.0523	0.051	0.0518	0.0537	0.0532
		0.0507	0.0511	0.0508	0.0507	0.0513	0.0509	0.0514	0.0514	0.0514	0.053	0.0514	0.0529
		0.0513	0.0512	0.0503	0.0521	0.0522	0.052	0.0523	0.0523	0.0522	0.0517	0.052	0.0536
		0.0503	0.051	0.0495	0.0512	0.0511	0.0503	0.0514	0.0517	0.0515	0.0556	0.0518	0.0525
~End
Plate:	B	1.3	PlateFormat	Endpoint	Absorbance	Raw	FALSE	1						1	450	1	12	96	1	8
	Temperature(¡C)	1	2	3	4	5	6	7	8	9	10	11	12
	23	0.0683	0.0732	0.0697	0.0881	0.0718	0.3543	0.2709	0.0927	0.0813	0.0842	0.1177	0.0793
		0.0546	0.055	0.0531	0.0574	0.0545	0.1112	0.0925	0.063	0.0633	0.0625	0.0667	0.0621
		0.052	0.0523	0.051	0.0532	0.0512	0.0598	0.0552	0.0546	0.055	0.0559	0.058	0.055
		0.0544	0.0523	0.0521	0.0548	0.0524	0.0529	0.0537	0.0528	0.0553	0.0542	0.0545	0.0568
		0.0535	0.0524	0.0528	0.0546	0.0537	0.0528	0.054	0.0546	0.055	0.0534	0.0532	0.0556
		0.0512	0.0536	0.0538	0.0553	0.0546	0.0544	0.0553	0.0536	0.0533	0.0534	0.0546	0.0546
		0.0527	0.0542	0.0527	0.053	0.0554	0.0539	0.0542	0.054	0.0548	0.054	0.0549	0.0546
		0.053	0.0528	0.0538	0.053	0.0527	0.0524	0.0525	0.0537	0.0524	0.0524	0.0521	0.0533
~End
Plate:	H1	1.3	PlateFormat	Endpoint	Absorbance	Raw	FALSE	1						1	450	1	12	96	1	8
	Temperature(¡C)	1	2	3	4	5	6	7	8	9	10	11	12
	23	0.6992	0.6315	0.5969	0.798	0.5721	0.6692	0.6331	0.7997	0.589	0.3613	0.3787	0.4216
		0.2668	0.3	0.2038	0.3879	0.1955	0.2501	0.2517	0.481	0.1963	0.1026	0.1012	0.1622
		0.0823	0.0938	0.073	0.1024	0.0686	0.0756	0.0753	0.1474	0.0678	0.054	0.0534	0.0684
		0.0542	0.055	0.052	0.0553	0.0522	0.0524	0.0525	0.0629	0.0513	0.0508	0.0502	0.0543
		0.062	0.0528	0.0503	0.0512	0.0509	0.0506	0.0515	0.0516	0.0509	0.0504	0.0507	0.0553
		0.0512	0.0496	0.05	0.0496	0.0514	0.0504	0.0527	0.0511	0.0506	0.0508	0.051	0.0568
		0.0509	0.0493	0.0503	0.0506	0.0512	0.0512	0.0508	0.0524	0.0508	0.0501	0.0516	0.051
		0.051	0.0502	0.0515	0.0508	0.0517	0.0516	0.0521	0.0509	0.0504	0.0505	0.0567	0.0534
~End
Plate:	H2	1.3	PlateFormat	Endpoint	Absorbance	Raw	FALSE	1						1	450	1	12	96	1	8
	Temperature(¡C)	1	2	3	4	5	6	7	8	9	10	11	12
	23	0.885	0.6272	0.8133	0.9534	0.9066	1.4658	0.8826	0.907	0.9067	0.9841	0.7565	0.7887
		0.5097	0.2377	0.6619	0.6744	0.7944	0.6389	0.6042	0.648	0.7335	0.5144	0.3246	0.5923
		0.1465	0.0741	0.2913	0.2404	0.2234	0.236	0.2032	0.2211	0.3386	0.1536	0.0893	0.2279
		0.0595	0.0493	0.0913	0.0698	0.072	0.073	0.0673	0.072	0.0935	0.0601	0.052	0.0741
		0.0492	0.0475	0.0507	0.0514	0.0509	0.0496	0.0495	0.0506	0.0534	0.0491	0.0484	0.0513
		0.0465	0.0507	0.0503	0.0488	0.0477	0.0482	0.0478	0.0493	0.0494	0.0482	0.0484	0.0489
		0.0548	0.048	0.0491	0.05	0.0482	0.0484	0.0499	0.0491	0.0515	0.0484	0.0485	0.0492
		0.0506	0.0473	0.0472	0.0478	0.0472	0.0474	0.0476	0.0477	0.0479	0.0485	0.0475	0.0476
~End
Plate:	H3	1.3	PlateFormat	Endpoint	Absorbance	Raw	FALSE	1						1	450	1	12	96	1	8
	Temperature(¡C)	1	2	3	4	5	6	7	8	9	10	11	12
	23	0.9964	0.8898	0.824	1.0498	0.9223	0.9077	0.8445	0.8218	0.8168	0.9261	0.9035	0.9131
		0.6349	0.653	0.4957	0.7823	0.8273	0.795	0.5321	0.4852	0.4801	0.5403	0.6614	0.6627
		0.2228	0.256	0.1568	0.3588	0.4388	0.41	0.1672	0.1395	0.1423	0.1669	0.236	0.2502
		0.0757	0.0876	0.0638	0.1037	0.1308	0.1151	0.0657	0.0607	0.0616	0.0665	0.0747	0.0794
		0.0557	0.0578	0.0564	0.0577	0.0629	0.0585	0.0541	0.0522	0.053	0.0535	0.0568	0.0549
		0.0533	0.0536	0.0507	0.0534	0.0544	0.0534	0.0532	0.0529	0.0527	0.0525	0.0526	0.0532
		0.0543	0.0542	0.0521	0.0579	0.0542	0.0534	0.0532	0.0517	0.0529	0.0526	0.0545	0.0528
		0.0537	0.0523	0.0525	0.053	0.0526	0.0562	0.0523	0.0527	0.0529	0.0506	0.0515	0.0562
~End
Plate:	H5	1.3	PlateFormat	Endpoint	Absorbance	Raw	FALSE	1						1	450	1	12	96	1	8
	Temperature(¡C)	1	2	3	4	5	6	7	8	9	10	11	12
	23.5	0.8452	0.8757	0.8381	0.9618	0.9104	0.9433	0.8757	0.913	0.9209	0.9004	0.8961	0.9716
		0.4019	0.4463	0.6298	0.7442	0.5585	0.785	0.5013	0.6686	0.7543	0.567	0.5494	0.6784
		0.1207	0.1272	0.2614	0.2913	0.1828	0.3692	0.1505	0.2424	0.3253	0.1778	0.1629	0.2484
		0.0584	0.0598	0.0818	0.0827	0.0685	0.1033	0.0612	0.0797	0.0945	0.0653	0.0628	0.076
		0.0505	0.0514	0.0538	0.0542	0.0519	0.0596	0.0551	0.0585	0.0605	0.0524	0.0501	0.0509
		0.05	0.0507	0.0513	0.0499	0.0506	0.0515	0.0512	0.051	0.052	0.0513	0.0497	0.0523
		0.0502	0.0488	0.0499	0.0557	0.0524	0.0569	0.0577	0.0559	0.0617	0.0594	0.0494	0.0448
		0.0506	0.0518	0.0492	0.0493	0.0496	0.0487	0.0496	0.0477	0.0514	0.0447	0.0462	0.0548
~End
Plate:	H7	1.3	PlateFormat	Endpoint	Absorbance	Raw	FALSE	1						1	450	1	12	96	1	8
	Temperature(¡C)	1	2	3	4	5	6	7	8	9	10	11	12
	23	0.8438	0.6036	0.7138	0.6492	0.5346	0.7525	0.8069	0.7207	0.3676	0.1926	0.5797	0.5944
		0.3775	0.2191	0.3283	0.2564	0.1908	0.4103	0.403	0.3689	0.1277	0.0894	0.1955	0.2382
		0.1053	0.0741	0.099	0.0822	0.0705	0.1217	0.115	0.1146	0.0665	0.0606	0.0702	0.0799
		0.0581	0.0538	0.0554	0.0545	0.0542	0.061	0.0588	0.0587	0.0525	0.054	0.0558	0.0703
		0.0565	0.0513	0.0524	0.0532	0.0523	0.0535	0.0535	0.0538	0.0522	0.0526	0.0528	0.0495
		0.052	0.052	0.0514	0.0511	0.0529	0.0527	0.0519	0.0529	0.0531	0.0543	0.0481	0.0503
		0.0537	0.0516	0.0513	0.0527	0.0523	0.0523	0.0539	0.0533	0.055	0.0563	0.0539	0.0543
		0.0532	0.0523	0.0517	0.0548	0.0534	0.0566	0.0573	0.0537	0.0523	0.0477	0.0537	0.0519
~End
Plate:	H9	1.3	PlateFormat	Endpoint	Absorbance	Raw	FALSE	1						1	450	1	12	96	1	8
	Temperature(¡C)	1	2	3	4	5	6	7	8	9	10	11	12
	23.5	0.9355	0.1796	0.0757	0.1337	0.464	0.6422	0.7982	0.2425	0.9747	0.9578	0.9577	1.0112
		0.4961	0.0691	0.052	0.0614	0.1543	0.2508	0.465	0.0789	0.8256	0.7632	0.771	0.836
		0.1362	0.0521	0.05	0.0522	0.0629	0.0733	0.1509	0.0526	0.4331	0.3458	0.3485	0.4105
		0.0614	0.052	0.0511	0.0514	0.0522	0.0547	0.0633	0.0513	0.127	0.1017	0.0971	0.141
		0.0543	0.0521	0.0519	0.0544	0.052	0.0535	0.0542	0.0522	0.0631	0.059	0.0579	0.0634
		0.054	0.0521	0.0537	0.0555	0.0519	0.0551	0.0525	0.0528	0.0544	0.053	0.055	0.0496
		0.0542	0.0526	0.0542	0.0531	0.0545	0.0539	0.0542	0.0543	0.0546	0.0554	0.0542	0.0576
		0.053	0.0538	0.0539	0.0542	0.0573	0.054	0.0524	0.0535	0.0531	0.0528	0.0545	0.0535
~End
Plate:	B	1.3	PlateFormat	Endpoint	Absorbance	Raw	FALSE	1						1	450	1	12	96	1	8
	Temperature(¡C)	1	2	3	4	5	6	7	8	9	10	11	12
	23.5	0.221	0.0751	0.0689	0.1087	0.0881	0.0779	0.0718	0.0736	0.1178	0.0921	0.5135	0.1174
		0.0759	0.0601	0.0542	0.0623	0.0614	0.061	0.0559	0.0649	0.065	0.0602	0.1616	0.0784
		0.0578	0.054	0.0518	0.0547	0.0555	0.0535	0.0528	0.0524	0.0544	0.0536	0.0631	0.0503
		0.0549	0.0569	0.0551	0.0566	0.0561	0.0551	0.0538	0.0554	0.0547	0.0545	0.055	0.0586
		0.0562	0.0553	0.0545	0.0551	0.0566	0.0581	0.057	0.057	0.0584	0.0582	0.0622	0.0549
		0.0565	0.0546	0.0549	0.0566	0.0544	0.0615	0.0574	0.056	0.0554	0.0597	0.0566	0.0467
		0.0569	0.0547	0.0563	0.0571	0.0569	0.0599	0.0558	0.0568	0.0568	0.059	0.054	0.0561
		0.0646	0.0552	0.0559	0.0584	0.0568	0.0571	0.0612	0.0602	0.0602	0.0557	0.0566	0.0477
~End
Original Filename: 20240530 Serum ELISA - d28 BOAS components; Date Last Saved: 5/30/2024 4:56:17 PM

## Sheet: raw data 2
##BLOCKS= 14
Plate:	H1	1.3	PlateFormat	Endpoint	Absorbance	Raw	FALSE	1						1	450	1	12	96	1	8
	Temperature(¡C)	1	2	3	4	5	6	7	8	9	10	11	12
	23.5	0.539	0.6324	0.6612	0.6167	0.5187	0.2089	0.3539	0.4304	0.8198	0.4438	0.5215	0.6325
		0.1965	0.3095	0.3431	0.3055	0.2325	0.0779	0.141	0.1371	0.4814	0.161	0.203	0.3958
		0.0668	0.087	0.087	0.0882	0.0731	0.0522	0.0599	0.0588	0.1341	0.0609	0.0674	0.0877
		0.0532	0.0543	0.0547	0.0547	0.0528	0.0521	0.0511	0.0506	0.0597	0.0519	0.0516	0.0543
		0.0533	0.0521	0.0539	0.053	0.0514	0.0513	0.0519	0.0511	0.0509	0.0512	0.0518	0.0529
		0.0534	0.0527	0.0557	0.0517	0.0526	0.0514	0.0515	0.052	0.0514	0.0504	0.0507	0.0517
		0.0536	0.0506	0.0574	0.0527	0.0519	0.0515	0.0521	0.0506	0.0514	0.0517	0.0511	0.0554
		0.0531	0.0518	0.0519	0.0525	0.0527	0.052	0.052	0.052	0.052	0.0515	0.0523	0.056
~End
Plate:	H2	1.3	PlateFormat	Endpoint	Absorbance	Raw	FALSE	1						1	450	1	12	96	1	8
	Temperature(¡C)	1	2	3	4	5	6	7	8	9	10	11	12
	23.5	0.6173	0.7851	0.6744	0.7237	0.7019	0.541	0.7718	0.6929	0.6794	0.5775	0.6425	0.6677
		0.2904	0.4409	0.2794	0.378	0.3354	0.231	0.4248	0.3743	0.3534	0.2952	0.2805	0.4752
		0.0862	0.1136	0.0778	0.1022	0.0937	0.0735	0.1203	0.1036	0.1076	0.0923	0.0838	0.1444
		0.0559	0.0569	0.0517	0.0558	0.0544	0.052	0.0579	0.0551	0.0577	0.0556	0.0549	0.0791
		0.0535	0.0504	0.0507	0.0498	0.0511	0.0508	0.0516	0.0501	0.0538	0.051	0.0514	0.0574
		0.0503	0.0536	0.0516	0.0518	0.0515	0.0516	0.0522	0.0511	0.051	0.0515	0.0507	0.0519
		0.0541	0.0462	0.0491	0.0515	0.0504	0.0509	0.051	0.0514	0.0515	0.0506	0.0512	0.0507
		0.05	0.0491	0.0566	0.0498	0.0506	0.0498	0.0497	0.0505	0.05	0.0499	0.0488	0.0523
~End
Plate:	H3	1.3	PlateFormat	Endpoint	Absorbance	Raw	FALSE	1						1	450	1	12	96	1	8
	Temperature(¡C)	1	2	3	4	5	6	7	8	9	10	11	12
	23.5	0.8387	0.8672	0.8641	0.8674	0.7675	0.7328	0.8185	0.7759	0.8557	0.8207	0.8257	0.8417
		0.4381	0.5481	0.5524	0.6784	0.4089	0.403	0.5359	0.451	0.6145	0.5381	0.5392	0.5886
		0.1263	0.1833	0.1732	0.2608	0.122	0.1183	0.1742	0.1318	0.2453	0.1742	0.1724	0.206
		0.0629	0.0681	0.0685	0.0823	0.0607	0.0596	0.0672	0.0612	0.0821	0.0691	0.0665	0.0731
		0.0573	0.0564	0.0546	0.0561	0.0534	0.0534	0.0546	0.0534	0.0566	0.0544	0.0552	0.058
		0.0542	0.0591	0.053	0.0532	0.0524	0.0529	0.0536	0.0538	0.0544	0.0532	0.0535	0.0551
		0.0552	0.0536	0.0542	0.0541	0.0535	0.0523	0.0537	0.0531	0.0529	0.0525	0.0536	0.0558
		0.0536	0.0566	0.0527	0.0532	0.0529	0.052	0.0525	0.0535	0.0537	0.054	0.0553	0.0538
~End
Plate:	H5	1.3	PlateFormat	Endpoint	Absorbance	Raw	FALSE	1						1	450	1	12	96	1	8
	Temperature(¡C)	1	2	3	4	5	6	7	8	9	10	11	12
	23.5	0.9428	0.8741	0.8525	0.8411	0.8273	0.5163	0.6265	0.8488	0.8007	0.7929	0.783	0.758
		0.5356	0.581	0.5048	0.5606	0.4912	0.2139	0.2555	0.5283	0.5006	0.5	0.4925	0.3693
		0.148	0.188	0.1501	0.1871	0.1554	0.0765	0.0965	0.1627	0.1728	0.1554	0.1601	0.1071
		0.0626	0.0678	0.0619	0.0674	0.0635	0.0529	0.0558	0.0628	0.0668	0.0633	0.0624	0.0567
		0.0547	0.0526	0.0519	0.0539	0.0515	0.05	0.0514	0.0512	0.052	0.0514	0.0521	0.051
		0.0511	0.0519	0.0506	0.0504	0.0496	0.0497	0.0499	0.0504	0.0504	0.0497	0.0491	0.0509
		0.052	0.0507	0.0546	0.0509	0.0504	0.0501	0.0502	0.0484	0.0497	0.0506	0.0509	0.0511
		0.051	0.0505	0.0504	0.0533	0.0511	0.0497	0.0508	0.0504	0.0507	0.0514	0.0508	0.051
~End
Plate:	H7	1.3	PlateFormat	Endpoint	Absorbance	Raw	FALSE	1						1	450	1	12	96	1	8
	Temperature(¡C)	1	2	3	4	5	6	7	8	9	10	11	12
	23.5	0.1364	0.1538	0.405	0.2711	0.0947	0.3076	0.2861	0.4598	0.5383	0.3492	0.7591	0.4395
		0.0695	0.0834	0.1496	0.0998	0.0576	0.1008	0.1359	0.1863	0.1955	0.1208	0.3612	0.2357
		0.0551	0.0584	0.065	0.0599	0.0519	0.0564	0.0671	0.0719	0.0738	0.0616	0.1041	0.0902
		0.0542	0.0532	0.0535	0.0541	0.0527	0.0524	0.0526	0.0533	0.0538	0.0527	0.0571	0.0571
		0.0543	0.0579	0.0549	0.0537	0.0519	0.0528	0.0521	0.0516	0.0519	0.0514	0.0524	0.053
		0.0524	0.0538	0.0525	0.0522	0.0521	0.0522	0.0529	0.0521	0.053	0.0524	0.0528	0.0527
		0.0535	0.0529	0.0533	0.0533	0.0526	0.0501	0.0515	0.0513	0.0519	0.0532	0.0533	0.0539
		0.0534	0.0524	0.0526	0.053	0.0534	0.0516	0.053	0.0524	0.0529	0.0535	0.0523	0.0542
~End
Plate:	H9	1.3	PlateFormat	Endpoint	Absorbance	Raw	FALSE	1						1	450	1	12	96	1	8
	Temperature(¡C)	1	2	3	4	5	6	7	8	9	10	11	12
	23.5	0.9235	0.9966	0.9538	0.9442	0.373	0.8501	0.9068	0.9006	0.9252	0.9265	0.9375	0.9301
		0.533	0.8098	0.8076	0.8117	0.1225	0.515	0.5875	0.7304	0.7946	0.7936	0.8024	0.8049
		0.1583	0.384	0.3782	0.4006	0.06	0.1491	0.1959	0.3159	0.4022	0.3771	0.3934	0.4981
		0.0652	0.1108	0.1115	0.1175	0.0556	0.0633	0.0689	0.0933	0.1226	0.1126	0.1116	0.1514
		0.056	0.0666	0.0633	0.0617	0.0528	0.0543	0.0567	0.0581	0.0621	0.0595	0.0628	0.0641
		0.0554	0.0588	0.055	0.0562	0.056	0.0549	0.0537	0.0553	0.0568	0.058	0.058	0.0569
		0.0611	0.0551	0.0558	0.0556	0.0551	0.056	0.0568	0.0559	0.0555	0.0556	0.0558	0.0468
		0.0542	0.0546	0.0535	0.0542	0.0543	0.0584	0.0536	0.0529	0.053	0.0537	0.0541	0.0535
~End
Plate:	B	1.3	PlateFormat	Endpoint	Absorbance	Raw	FALSE	1						1	450	1	12	96	1	8
	Temperature(¡C)	1	2	3	4	5	6	7	8	9	10	11	12
	23.5	0.0844	0.0804	0.0812	0.0986	0.0698	0.1296	0.5925	0.7142	0.769	0.9484	0.8884	0.7563
		0.0637	0.0579	0.0607	0.0606	0.0557	0.0608	0.2093	0.2994	0.3454	0.6539	0.5249	0.3062
		0.0567	0.0536	0.0541	0.055	0.0533	0.0534	0.0758	0.0894	0.1085	0.2212	0.1587	0.0967
		0.0562	0.0557	0.0538	0.0548	0.0545	0.054	0.0566	0.0583	0.0611	0.0787	0.0664	0.0611
		0.057	0.0544	0.0543	0.0544	0.054	0.0537	0.0556	0.054	0.0543	0.0575	0.0562	0.0562
		0.0545	0.0547	0.0552	0.055	0.0554	0.054	0.0546	0.0553	0.055	0.0552	0.0548	0.0558
		0.0544	0.056	0.0623	0.0543	0.0572	0.055	0.0549	0.0546	0.0546	0.0556	0.056	0.0556
		0.0551	0.0548	0.0541	0.0545	0.0559	0.0546	0.0552	0.0549	0.0569	0.0552	0.0542	0.056
~End
Plate:	H1	1.3	PlateFormat	Endpoint	Absorbance	Raw	FALSE	1						1	450	1	12	96	1	8
	Temperature(¡C)	1	2	3	4	5	6	7	8	9	10	11	12
	23.5	0.7268	0.8191	0.7449	0.9153	0.8571	0.0759	0.0699	0.0648	0.4661	0.0768	0.0663	0.0679
		0.3339	0.6015	0.4074	0.8071	0.6022	0.0542	0.0515	0.0515	0.2095	0.0526	0.0517	0.0549
		0.0914	0.1834	0.1058	0.397	0.2061	0.0491	0.0495	0.0505	0.0666	0.0494	0.0494	0.052
		0.0555	0.0639	0.055	0.1103	0.0689	0.0494	0.05	0.0498	0.0506	0.0495	0.0495	0.0514
		0.0508	0.0513	0.0502	0.0581	0.0515	0.0496	0.0502	0.0492	0.0496	0.0501	0.0505	0.053
		0.0784	0.0508	0.0498	0.0518	0.0531	0.0502	0.0503	0.05	0.0501	0.052	0.0513	0.0519
		0.0508	0.051	0.0506	0.0582	0.0514	0.0524	0.0493	0.0501	0.05	0.0501	0.0529	0.0519
		0.051	0.0509	0.0498	0.0503	0.0514	0.0508	0.0516	0.0514	0.0548	0.0519	0.0518	0.0527
~End
Plate:	H7	1.3	PlateFormat	Endpoint	Absorbance	Raw	FALSE	1						1	450	1	12	96	1	8
	Temperature(¡C)	1	2	3	4	5	6	7	8	9	10	11	12
	23.5	0.2272	0.6576	0.5058	0.6716	0.5635	0.1555	0.5444	0.1698	0.8393	0.533	0.0708	0.0693
		0.0884	0.2135	0.1777	0.2748	0.2053	0.0684	0.2	0.0734	0.5245	0.1588	0.0517	0.054
		0.0561	0.0686	0.0662	0.0834	0.0729	0.0525	0.0699	0.0539	0.1621	0.061	0.0504	0.0521
		0.055	0.052	0.0523	0.0547	0.0528	0.0494	0.0525	0.0501	0.0655	0.0511	0.0505	0.0518
		0.0514	0.0509	0.0508	0.0513	0.0525	0.0521	0.0507	0.0502	0.0519	0.0512	0.0508	0.0528
		0.0514	0.051	0.0503	0.051	0.0529	0.051	0.0518	0.0539	0.0519	0.0508	0.0509	0.0527
		0.0519	0.0508	0.0505	0.0508	0.052	0.051	0.051	0.0512	0.0517	0.0523	0.0523	0.0565
		0.0518	0.0509	0.0504	0.0525	0.0534	0.0507	0.0509	0.0522	0.0527	0.052	0.0529	0.054
~End
Plate:	H2	1.3	PlateFormat	Endpoint	Absorbance	Raw	FALSE	1						1	450	1	12	96	1	8
	Temperature(¡C)	1	2	3	4	5	6	7	8	9	10	11	12
	23.5	0.6924	0.8391	0.8928	0.7909	0.8724	0.0991	0.7192	0.3141	0.1831	0.1295	0.057	0.073
		0.278	0.6149	0.6445	0.439	0.5848	0.055	0.4079	0.1019	0.0697	0.0588	0.0498	0.0614
		0.0805	0.2115	0.2209	0.1209	0.1964	0.0484	0.1275	0.0532	0.0493	0.0492	0.049	0.0508
		0.0535	0.0677	0.071	0.0572	0.067	0.0491	0.0568	0.0489	0.0493	0.0488	0.0485	0.0512
		0.0502	0.0501	0.0504	0.0521	0.0508	0.049	0.0508	0.0492	0.0485	0.0483	0.0493	0.0508
		0.0486	0.0476	0.0476	0.0472	0.0477	0.0478	0.048	0.049	0.0484	0.0475	0.0481	0.0488
		0.0511	0.0489	0.0496	0.0494	0.0502	0.0504	0.0499	0.0488	0.0487	0.0496	0.0499	0.0503
		0.0516	0.0494	0.053	0.05	0.0525	0.0503	0.049	0.0495	0.0505	0.05	0.0527	0.0516
~End
Plate:	H3	1.3	PlateFormat	Endpoint	Absorbance	Raw	FALSE	1						1	450	1	12	96	1	8
	Temperature(¡C)	1	2	3	4	5	6	7	8	9	10	11	12
	23.5	0.9132	0.8797	0.8067	0.8047	0.8986	0.1594	0.5343	0.374	0.8128	0.549	0.0626	0.0582
		0.5654	0.6232	0.4755	0.5038	0.6579	0.0633	0.1891	0.1178	0.4863	0.1931	0.0523	0.0531
		0.1765	0.2031	0.1378	0.1435	0.2652	0.0503	0.0675	0.0582	0.1379	0.0678	0.0506	0.0535
		0.0681	0.0707	0.061	0.0619	0.0842	0.0502	0.0522	0.0505	0.0601	0.0524	0.0507	0.0524
		0.0536	0.0534	0.0515	0.0528	0.0556	0.0508	0.0507	0.0499	0.0515	0.0511	0.0514	0.0535
		0.054	0.0522	0.0507	0.0505	0.0532	0.0511	0.0516	0.0517	0.0519	0.0513	0.0511	0.0537
		0.054	0.052	0.052	0.0521	0.0525	0.0516	0.051	0.0512	0.0512	0.0512	0.0525	0.0547
		0.056	0.0528	0.0517	0.0531	0.052	0.0513	0.0513	0.0529	0.0527	0.052	0.052	0.0542
~End
Plate:	H5	1.3	PlateFormat	Endpoint	Absorbance	Raw	FALSE	1						1	450	1	12	96	1	8
	Temperature(¡C)	1	2	3	4	5	6	7	8	9	10	11	12
	23.5	0.729	0.8459	0.885	0.8698	0.9028	0.5537	0.6971	0.6903	0.8212	0.7033	0.0744	0.0584
		0.3297	0.4799	0.6237	0.6151	0.6435	0.2244	0.3891	0.312	0.472	0.2992	0.0518	0.0503
		0.1028	0.1328	0.2141	0.1981	0.2452	0.0731	0.121	0.0912	0.1264	0.0846	0.0478	0.0509
		0.056	0.0588	0.0719	0.0706	0.0795	0.0509	0.0564	0.053	0.0567	0.052	0.0493	0.051
		0.0519	0.0503	0.0517	0.0515	0.0536	0.049	0.0504	0.0487	0.0492	0.0489	0.0491	0.0511
		0.0496	0.0503	0.049	0.0494	0.0512	0.0495	0.0498	0.0493	0.0484	0.0498	0.0489	0.051
		0.0498	0.0483	0.0489	0.0488	0.0495	0.0494	0.0493	0.0492	0.0486	0.0506	0.0502	0.054
		0.05	0.0499	0.0489	0.0522	0.0495	0.0486	0.0494	0.0527	0.0505	0.0507	0.0506	0.0625
~End
Plate:	H9	1.3	PlateFormat	Endpoint	Absorbance	Raw	FALSE	1						1	450	1	12	96	1	8
	Temperature(¡C)	1	2	3	4	5	6	7	8	9	10	11	12
	23.5	0.9832	0.9254	0.9112	0.9606	0.9363	0.8605	0.8657	0.8229	0.9548	0.8425	0.0653	0.0608
		0.7357	0.7098	0.6731	0.8	0.808	0.6326	0.7424	0.7245	0.9187	0.5429	0.0524	0.0532
		0.3135	0.2864	0.2624	0.3779	0.4035	0.2427	0.3474	0.3602	0.7124	0.1689	0.0513	0.0537
		0.0923	0.0842	0.0841	0.1083	0.1192	0.0787	0.0971	0.1051	0.2823	0.0643	0.0517	0.055
		0.0585	0.0571	0.0562	0.0628	0.0628	0.0555	0.0584	0.0595	0.0953	0.054	0.0527	0.054
		0.0542	0.0557	0.0534	0.0545	0.0544	0.0531	0.0535	0.0543	0.061	0.0523	0.0526	0.0561
		0.0532	0.0515	0.0522	0.0544	0.0528	0.0521	0.0523	0.052	0.0548	0.0528	0.0527	0.0534
		0.0532	0.0516	0.0522	0.0534	0.053	0.0518	0.0516	0.0526	0.0533	0.0524	0.0573	0.0548
~End
Plate:	B	1.3	PlateFormat	Endpoint	Absorbance	Raw	FALSE	1						1	450	1	12	96	1	8
	Temperature(¡C)	1	2	3	4	5	6	7	8	9	10	11	12
	23.5	0.8278	0.935	0.8745	0.812	0.8793	0.134	0.5043	0.1322	0.839	0.4267	0.0696	0.0649
		0.398	0.6015	0.5005	0.424	0.4882	0.0652	0.1736	0.0662	0.4752	0.1188	0.0593	0.0591
		0.1212	0.1918	0.15	0.1262	0.1518	0.0571	0.071	0.0577	0.1349	0.0632	0.0571	0.06
		0.0653	0.0739	0.0704	0.0668	0.0714	0.0573	0.0625	0.0572	0.0657	0.0592	0.0594	0.0623
		0.0599	0.0604	0.0582	0.057	0.0598	0.059	0.0589	0.058	0.0588	0.0583	0.0593	0.0626
		0.0597	0.0582	0.0612	0.0601	0.0596	0.0574	0.0582	0.0589	0.0591	0.0589	0.0596	0.0625
		0.0577	0.0589	0.0574	0.059	0.0578	0.0571	0.0573	0.0585	0.0579	0.0602	0.0596	0.0615
		0.0587	0.0581	0.0622	0.0581	0.0625	0.0573	0.0591	0.058	0.0589	0.0619	0.0596	0.0609
~End
Original Filename: 20240531 Serum ELISA - d28 BOAS components; Date Last Saved: 5/31/2024 4:27:24 PM

## Sheet: Baseline Corrected
H1	Dilution Factor	377 = 054	378	379	UR	LR	UL	LL	O	380	381	382	UR	LR	UL	LL	O	383	384 = 053	385 = 052	UR	LR	UL	LL	O	386	387	388	UR	LR	UL	LL	O	389	390 = 055	391 = 056	UR	LR	UL	LL	O	392	393	394	UR	LR	UL	LL	O
	50	0.7024	0.5725	0.5233	0.6743	0.669	0.5995	0.5536	0.7863	0.6351	0.6947	0.3368	0.5304	0.7241	0.4965	0.639	0.5828	0.5472	0.8463	0.6797	0.7976	0.747	0.8694	0.7085	0.8633	0.6482	0.5813	0.5454	0.7472	0.5204	0.6176	0.581	0.7488	0.5386	0.3108	0.322	0.3682	0.4859	0.5806	0.6093	0.5642	0.466	0.1569	0.3019	0.3784	0.7678	0.3923	0.4692	0.5765
	500	0.421	0.2101	0.2182	0.3386	0.3179	0.2449	0.2127	0.6061	0.3704	0.4424	0.1241	0.1918	0.2877	0.1245	0.2593	0.1973	0.2516	0.5725	0.2824	0.5062	0.4552	0.4993	0.3638	0.5695	0.2158	0.2498	0.1523	0.3371	0.1438	0.1985	0.1996	0.4301	0.1459	0.0521	0.0445	0.1088	0.1434	0.2577	0.2912	0.253	0.1798	0.0259	0.089	0.0851	0.4294	0.1095	0.1507	0.3398
	5001	0.0757	0.0225	0.0386	0.0735	0.0548	0.0365	0.0302	0.1843	0.0759	0.1056	0.0183	0.0315	0.0439	0.0145	0.0368	0.0241	0.0417	0.1362	0.0433	0.1148	0.1097	0.102	0.0628	0.129	0.0313	0.0436	0.0215	0.0516	0.0169	0.024	0.0232	0.0965	0.0174	0.0035	-0.0033	0.015	0.0137	0.0352	0.0351	0.0357	0.0204	0.0002	0.0079	0.0068	0.0821	0.0094	0.0151	0.0317
	50014	0.0073	0.0007	0.0024	0.0061	0.003	0.0023	0.0017	0.0209	0.0051	0.009	0.0008	0.0019	0.0075	0.0069	0.0035	0.0003	0.0024	0.016	0.005	0.0119	0.0142	0.0132	0.0082	0.023	0.0032	0.0048	0.0005	0.0045	0.0005	0.0008	0.0004	0.012	0.0009	0.0003	-0.0065	0.0009	0.0001	0.0025	0.0028	0.0022	0.0001	0.0001	-0.0009	-0.0014	0.0077	0.0004	-0.0007	-0.0017
	500180	-0.0025	0.0002	0.0004	0.0012	0	0.0027	0.0017	0.0015	-0.0003	0.0004	0.0011	0.004	0.0111	0.0017	0.004	-0.001	-0.0013	0.0056	0.0017	0.0002	0.0024	0.0024	0.0016	0.0065	0.011	0.0026	-0.0012	0.0004	-0.0008	-0.001	-0.0006	0.0007	0.0005	-0.0001	-0.006	0.0019	0.0002	0.0003	0.002	0.0005	-0.0013	-0.0007	-0.0001	-0.0009	-0.0011	-0.0003	-0.0005	-0.0031
	5002251	-0.0022	-0.001	-0.002	-0.0023	-0.0006	0.0008	0.0003	-0.0006	-0.0007	-0.0005	0	-0.0006	0.0017	0.0032	0.0014	-0.0029	0.0127	0.0018	0.0003	-0.0004	0.0012	0.001	0.0055	0.0037	0.0002	-0.0006	-0.0015	-0.0012	-0.0003	-0.0012	0.0006	0.0002	0.0002	0.0003	-0.0057	0.0034	0.0003	0.0009	0.0038	-0.0008	-0.0001	-0.0006	-0.0005	0	-0.0006	-0.0011	-0.0016	-0.0043
	50027009	-0.001	-0.0005	-0.0004	0	-0.0015	0.0017	-0.0001	-0.0002	-0.0022	-0.0002	0.0011	0.0005	-0.0005	0.0001	0.0018	-0.0003	0.0003	0.002	0.0004	-0.0018	0.0003	0.0014	0.0008	0.0001	-0.0001	-0.0009	-0.0012	-0.0002	-0.0005	-0.0004	-0.0013	0.0015	0.0004	-0.0004	-0.0051	-0.0024	0.0005	-0.0012	0.0055	0.0002	-0.0008	-0.0005	0.0001	-0.0014	-0.0006	0.0002	-0.0012	-0.0006
		0.1	0.1	0.1	0.1	0.1	0.1	0.1	0.1	0.1	0.1	0.1	0.1	0.1	0.1	0.1	0.1	0.1	0.1	0.1	0.1	0.1	0.1	0.1	0.1	0.1	0.1	0.1	0.1	0.1	0.1	0.1	0.1	0.1	0.1	0.1	0.1	0.1	0.1	0.1	0.1	0.1	0.1	0.1	0.1	0.1	0.1	0.1	0.1
H2	Dilution Factor	377 = 054	378	379	UR	LR	UL	LL	O	380	381	382	UR	LR	UL	LL	O	383	384 = 053	385 = 052	UR	LR	UL	LL	O	386	387	388	UR	LR	UL	LL	O	389	390 = 055	391 = 056	UR	LR	UL	LL	O	392	393	394	UR	LR	UL	LL	O
	50	0.8591	0.58	0.7128	0.6913	0.7913	0.8099	0.6919	0.8067	0.7588	0.6939	0.6953	0.5368	0.5122	0.862	0.8287	0.7623	0.4236	0.846	1.5542	0.8048	0.8421	0.8257	0.8802	0.7116	0.8344	0.5799	0.7661	0.9056	0.8594	1.4184	0.835	0.8593	0.8588	0.9356	0.709	0.7411	0.5673	0.736	0.6178	0.6739	0.6513	0.4912	0.7221	0.6424	0.6294	0.5276	0.5937	0.6154
	500	0.6016	0.1548	0.3328	0.3321	0.5417	0.6425	0.4012	0.5787	0.4426	0.5326	0.4733	0.243	0.0894	0.5288	0.5287	0.4449	0.1292	0.6122	0.5282	0.6736	0.6356	0.637	0.746	0.5995	0.4591	0.1904	0.6147	0.6266	0.7472	0.5915	0.5566	0.6003	0.6856	0.4659	0.2771	0.5447	0.2404	0.3918	0.2228	0.3282	0.2848	0.1812	0.3751	0.3238	0.3034	0.2453	0.2317	0.4229
	5001	0.1638	0.0193	0.0601	0.0594	0.1504	0.2435	0.0813	0.1772	0.0862	0.2196	0.1295	0.0451	-0.0539	0.1291	0.1319	0.0962	0.0139	0.1921	0.1358	0.2956	0.2228	0.2214	0.3817	0.2928	0.0959	0.0268	0.2441	0.1926	0.1762	0.1886	0.1556	0.1734	0.2907	0.1051	0.0418	0.1803	0.0362	0.0645	0.0212	0.0524	0.0431	0.0237	0.0706	0.0531	0.0576	0.0424	0.035	0.0921
	50014	0.024	0.004	0.0098	0.0056	0.0158	0.0385	0.0079	0.0219	0.0084	0.0311	0.0142	0.0039	-0.0716	0.0122	0.0141	0.0093	0.0003	0.0207	0.0159	0.037	0.0312	0.0307	0.0803	0.06	0.0089	0.002	0.0441	0.022	0.0248	0.0256	0.0197	0.0243	0.0456	0.0116	0.0045	0.0265	0.0059	0.0078	-0.0049	0.006	0.0038	0.0022	0.0082	0.0046	0.0077	0.0057	0.0061	0.0268
	500180	0.0035	0.0005	0.0007	-0.0005	0.0008	0.0064	0.0029	0.0014	0.0006	0.0039	0.0006	0	-0.0728	-0.0006	0.0007	-0.0004	0.001	0.0013	0.0024	0.0062	0.0067	0.0034	0.0092	0.014	-0.0014	0.0002	0.0035	0.0036	0.0037	0.0022	0.0019	0.0029	0.0055	0.0006	0.0009	0.0037	0.0035	0.0013	-0.0059	0	0.0005	0.001	0.0019	-0.0004	0.0038	0.0011	0.0026	0.0051
	5002251	-0.0011	0.0015	0.0003	-0.0014	-0.0003	0	0.0008	0.0017	-0.0008	-0.0005	-0.0003	-0.0006	-0.0725	-0.0047	-0.001	-0.0027	-0.001	-0.0002	0.0003	0.0012	0.0005	0.0005	0.0025	0.0019	-0.0041	0.0034	0.0031	0.001	0.0005	0.0008	0.0002	0.0016	0.0015	-0.0003	0.0009	0.0013	0.0003	0.0045	-0.005	0.002	0.0009	0.0018	0.0025	0.0006	0.001	0.0016	0.0019	-0.0004
	50027009	-0.0001	0.0018	0.0004	-0.0015	0.0002	-0.0001	0.0011	-0.0006	-0.0007	0.0005	-0.0014	-0.0012	-0.0717	-0.0051	-0.0041	-0.0018	-0.0009	-0.0009	-0.0008	-0.0024	-0.0001	-0.0003	-0.0009	0.0018	0.0042	0.0007	0.0019	0.0022	0.001	0.001	0.0023	0.0014	0.0036	-0.0001	0.001	0.0016	0.0041	-0.0029	-0.0075	0.0017	-0.0002	0.0011	0.0013	0.0009	0.0015	0.0007	0.0024	-0.0016
		0.1	0.1	0.1	0.1	0.1	0.1	0.1	0.1	0.1	0.1	0.1	0.1	0.1	0.1	0.1	0.1	0.1	0.1	0.1	0.1	0.1	0.1	0.1	0.1	0.1	0.1	0.1	0.1	0.1	0.1	0.1	0.1	0.1	0.1	0.1	0.1	0.1	0.1	0.1	0.1	0.1	0.1	0.1	0.1	0.1	0.1	0.1	0.1
H3	Dilution Factor	377 = 054	378	379	UR	LR	UL	LL	O	380	381	382	UR	LR	UL	LL	O	383	384 = 053	385 = 052	UR	LR	UL	LL	O	386	387	388	UR	LR	UL	LL	O	389	390 = 055	391 = 056	UR	LR	UL	LL	O	392	393	394	UR	LR	UL	LL	O
	50	0.7422	0.6745	0.7316	0.7287	0.8163	0.7713	0.5392	0.8112	0.7451	0.7954	0.8163	0.7406	0.8301	0.8657	0.8102	0.8351	0.6628	0.8714	0.8254	0.8103	0.8657	1.0627	0.9092	0.8062	0.9427	0.8375	0.7715	0.9968	0.8697	0.8515	0.7922	0.7691	0.7639	0.8755	0.852	0.8569	0.7851	0.8106	0.8114	0.8142	0.7146	0.6808	0.766	0.7224	0.802	0.7667	0.7704	0.7879
	500	0.4465	0.2926	0.4271	0.4357	0.7255	0.5417	0.1815	0.6598	0.4818	0.7316	0.6492	0.4902	0.4066	0.5216	0.6094	0.6706	0.338	0.6008	0.5423	0.6534	0.7216	0.6973	0.7107	0.557	0.5812	0.6007	0.4432	0.7293	0.7747	0.7388	0.4798	0.4325	0.4272	0.4897	0.6099	0.6065	0.3845	0.4915	0.4997	0.6252	0.356	0.351	0.4834	0.3975	0.5608	0.4841	0.4839	0.5348
	5001	0.1025	0.055	0.0998	0.1066	0.3871	0.1873	0.0307	0.2797	0.1184	0.4402	0.2757	0.1568	0.0771	0.1292	0.2215	0.2766	0.0623	0.1935	0.1634	0.258	0.3573	0.2916	0.3312	0.1947	0.1691	0.2037	0.1043	0.3058	0.3862	0.3538	0.1149	0.0868	0.0894	0.1163	0.1845	0.194	0.0727	0.1267	0.1205	0.2076	0.0691	0.0663	0.1217	0.0783	0.1916	0.1202	0.1171	0.1522
	50014	0.0145	0.0105	0.0132	0.0141	0.0735	0.0283	0.0033	0.0443	0.0147	0.0967	0.0494	0.0214	0.0094	0.0146	0.0326	0.0489	0.0043	0.0238	0.0192	0.0348	0.0666	0.046	0.0653	0.032	0.022	0.0353	0.0113	0.0507	0.0782	0.0589	0.0134	0.008	0.0087	0.0159	0.0232	0.0232	0.0093	0.0115	0.0158	0.0291	0.0078	0.0076	0.0147	0.0077	0.0284	0.0151	0.0112	0.0193
	500180	0.0043	0.0068	0.0054	0.0012	0.0088	0.0031	0.0008	0.0044	0.0012	0.0108	0.0063	0.0078	0.0029	0.0009	0.0033	0.0084	-0.0006	0.0034	0.0023	0.0036	0.008	0.0064	0.0103	0.0041	0.002	0.0055	0.0039	0.0047	0.0103	0.0023	0.0018	-0.0005	0.0001	0.0029	0.0053	-0.0013	0.0037	-0.0002	0.0019	0.0029	0.0005	0.0014	0.0021	-0.0001	0.0029	0.0004	-0.0001	0.0042
	5002251	0.0001	0.0022	0.001	-0.0003	0.0036	0.0022	0.0019	0.0017	0.0008	0.0029	0.0013	0	0.0008	-0.0006	0.0019	0.0018	-0.001	-0.0001	-0.0007	0	0.0026	0.0008	0.001	0.0018	-0.0004	0.0013	-0.0018	0.0004	0.0018	-0.0028	0.0009	0.0002	-0.0002	0.0019	0.0011	-0.003	0.0006	0.0025	0.0003	0	-0.0005	0.0009	0.0011	0.0003	0.0007	-0.0008	-0.0018	0.0013
	50027009	0.0015	0.0009	0.0009	-0.0006	0.0028	0.0005	0.0021	0.0018	0.0002	0.0003	0.0021	-0.001	0.0005	0.0005	0.0013	0.0022	-0.0008	0.0008	-0.0002	-0.001	0.0005	0.0016	0.0012	-0.0009	0.0006	0.0019	-0.0004	0.0049	0.0016	-0.0028	0.0009	-0.001	0	0.002	0.003	-0.0034	0.0016	-0.003	0.0015	0.0009	0.0006	0.0003	0.0012	-0.0004	-0.0008	-0.0015	-0.0017	0.002
		0.1	0.1	0.1	0.1	0.1	0.1	0.1	0.1	0.1	0.1	0.1	0.1	0.1	0.1	0.1	0.1	0.1	0.1	0.1	0.1	0.1	0.1	0.1	0.1	0.1	0.1	0.1	0.1	0.1	0.1	0.1	0.1	0.1	0.1	0.1	0.1	0.1	0.1	0.1	0.1	0.1	0.1	0.1	0.1	0.1	0.1	0.1	0.1
H4	Dilution Factor	377 = 054	378	379	UR	LR	UL	LL	O	380	381	382	UR	LR	UL	LL	O	383	384 = 053	385 = 052	UR	LR	UL	LL	O	386	387	388	UR	LR	UL	LL	O	389	390 = 055	391 = 056	UR	LR	UL	LL	O	392	393	394	UR	LR	UL	LL	O
	50	0.7828	0.5423	0.5951	0.8386	0.8158	0.8188	0.729	0.7893	0.9343	0.8535	0.8753	0.8398	0.8274	0.8721	0.8218	0.8382	0.8352	0.8048	0.8381	0.8241	0.838	0.8218	0.8928	0.8485	0.8088	0.8294	0.7221	0.8255	0.824	0.7966	0.8134	0.8102	0.988	0.7904	0.7888	0.8123	0.8835	0.9211	0.8315	0.8553	0.8287	0.8222	0.8723	0.8738	0.8518	0.817	0.8878	0.8618
	500	0.55	0.2214	0.2567	0.5435	0.6193	0.5081	0.4776	0.4535	0.7192	0.8829	0.7678	0.7665	0.6468	0.8459	0.7819	0.8162	0.7753	0.7172	0.7287	0.8174	0.7959	0.7731	0.8369	0.8235	0.6075	0.7319	0.6487	0.8143	0.8377	0.7841	0.7687	0.7983	0.7292	0.733	0.6808	0.7886	0.6944	0.7682	0.7871	0.7906	0.6521	0.6857	0.7805	0.8276	0.8439	0.7999	0.8482	0.7941
	5001	0.2003	0.0482	0.0553	0.1896	0.3091	0.1888	0.1564	0.1514	0.3815	0.7569	0.4685	0.4598	0.3033	0.6512	0.5571	0.6645	0.5762	0.4905	0.4411	0.6657	0.6029	0.5177	0.6869	0.6261	0.2339	0.4082	0.3268	0.6174	0.6519	0.5589	0.4903	0.559	0.4213	0.4301	0.35	0.578	0.3163	0.4311	0.5655	0.5247	0.3088	0.3453	0.482	0.5747	0.6562	0.548	0.6187	0.5093
	50014	0.0344	0.0003	0.0101	0.0338	0.0827	0.0346	0.0263	0.0221	0.0888	0.4199	0.1301	0.1188	0.0698	0.2835	0.213	0.3498	0.2261	0.1723	0.1224	0.3348	0.2613	0.1937	0.3474	0.2568	0.0467	0.1216	0.0961	0.2767	0.3002	0.2213	0.1665	0.2072	0.1248	0.1336	0.0869	0.2446	0.0562	0.1101	0.2254	0.15	0.0554	0.0811	0.1333	0.1878	0.2805	0.1879	0.2271	0.1464
	500180	0.0064	0.0059	0.0003	-0.0015	0.0143	0.0004	0.0067	0.0027	0.0139	0.1208	0.0269	0.0166	0.0112	0.0664	0.0444	0.0973	0.0465	0.0338	0.0232	0.0933	0.0631	0.0416	0.0999	0.0655	0.0239	0.0393	0.0326	0.0667	0.0696	0.0482	0.0446	0.0427	0.0215	0.0225	0.016	0.0536	0.0019	0.0227	0.0556	0.0332	0.0049	0.0062	0.0277	0.0459	0.0708	0.0402	0.0493	0.0309
	5002251	0.0018	-0.0022	-0.0031	-0.0067	0.0019	-0.0046	0.0028	0.0011	0.001	0.0296	0.0056	-0.0008	-0.0009	0.0162	0.0078	0.029	0.0085	0.0071	0.0059	0.0239	0.0143	0.0114	0.0271	0.0147	0.0014	0.0116	0.0105	0.0157	0.0185	0.0128	0.0099	0.0147	0.0048	0.0061	0.0043	0.016	0.0008	0.0063	0.0173	-0.0011	0.0039	0.0027	0.0089	0.0155	0.0218	0.0095	0.0076	-0.0047
	50027009	-0.0034	-0.0017	0.0016	-0.0041	0.0007	-0.0042	-0.0007	-0.0019	0.0004	0.0129	0.0029	-0.003	0.0002	0.0049	0.0034	0.0194	0.003	0.0034	0.0017	0.0145	0.0052	0.0052	0.0107	0.0048	0.0019	0.0026	0.002	0.0095	0.0062	0.0053	0.0036	0.0033	0.0041	0.0098	0.0058	0.0022	-0.0091	0.002	0.0021	0.0034	-0.0037	-0.0045	0.0026	0.0099	0.0137	0.004	0.0026	-0.003
		0.1	0.1	0.1	0.1	0.1	0.1	0.1	0.1	0.1	0.1	0.1	0.1	0.1	0.1	0.1	0.1	0.1	0.1	0.1	0.1	0.1	0.1	0.1	0.1	0.1	0.1	0.1	0.1	0.1	0.1	0.1	0.1	0.1	0.1	0.1	0.1	0.1	0.1	0.1	0.1	0.1	0.1	0.1	0.1	0.1	0.1	0.1	0.1
H5	Dilution Factor	377 = 054	378	379	UR	LR	UL	LL	O	380	381	382	UR	LR	UL	LL	O	383	384 = 053	385 = 052	UR	LR	UL	LL	O	386	387	388	UR	LR	UL	LL	O	389	390 = 055	391 = 056	UR	LR	UL	LL	O	392	393	394	UR	LR	UL	LL	O
	50	0.3948	0.0908	0.2022	0.3131	0.5028	0.4327	0.6754	0.3378	0.4857	0.4633	0.5705	0.3711	0.3164	0.6394	0.5089	0.3905	0.1997	0.889	0.8367	0.7943	0.8502	0.8565	0.8467	0.8071	0.7946	0.8239	0.7889	0.9125	0.8608	0.8946	0.8261	0.8653	0.8695	0.8557	0.8499	0.9168	0.8918	0.8236	0.8021	0.7878	0.7762	0.4666	0.5757	0.7984	0.75	0.7415	0.7322	0.707
	500	0.1286	0.0165	0.0403	0.1	0.1636	0.0865	0.2871	0.0597	0.1479	0.3291	0.2966	0.1511	0.0847	0.2675	0.1617	0.1547	0.0598	0.5981	0.5279	0.5104	0.7553	0.6798	0.6442	0.6328	0.3513	0.3945	0.5806	0.6949	0.5089	0.7363	0.4517	0.6209	0.7029	0.5223	0.5032	0.6236	0.4846	0.5305	0.4544	0.5073	0.4401	0.1642	0.2047	0.4779	0.4499	0.4486	0.4417	0.3183
	5001	0.0172	0.0035	0.0069	0.0154	0.0269	0.0119	0.0453	0.008	0.0201	0.111	0.0664	0.0415	0.0142	0.0537	0.0226	0.0401	0.0089	0.1728	0.1434	0.1403	0.4	0.2678	0.2591	0.2685	0.0701	0.0754	0.2122	0.242	0.1332	0.3205	0.1009	0.1947	0.2739	0.1331	0.1167	0.1936	0.097	0.1375	0.0997	0.1338	0.1043	0.0268	0.0457	0.1123	0.1221	0.104	0.1093	0.0561
	50014	0.0032	0.0023	0.0017	0.0014	0.0023	0.0003	0.004	-0.0004	0.0009	0.0158	0.0068	0.0067	0.0014	0.007	0.0016	0.0072	0.0001	0.0226	0.0161	0.0184	0.0815	0.0391	0.0542	0.0436	0.0078	0.008	0.0326	0.0334	0.0189	0.0546	0.0116	0.032	0.0431	0.0206	0.0166	0.0212	0.0116	0.0173	0.0115	0.0141	0.0124	0.0032	0.005	0.0124	0.0161	0.0119	0.0116	0.0057
	500180	-0.0019	-0.0015	-0.0005	-0.0003	-0.0005	-0.001	-0.0011	-0.0008	-0.0013	0.0001	-0.0022	0.0013	-0.0003	0.0009	0.0004	0.0013	-0.0018	0.0028	0.0019	0.0018	0.0105	0.0078	0.0084	0.0058	-0.0001	-0.0004	0.0046	0.0049	0.0023	0.0109	0.0055	0.0108	0.0091	0.0077	0.0039	-0.0039	0.0037	0.0021	0.0015	0.0006	0.0004	0.0003	0.0006	0.0008	0.0013	0	0.0013	0
	5002251	-0.0052	0.0005	-0.0016	-0.0014	-0.0011	0	0	-0.0013	-0.0023	-0.0007	-0.0022	0.002	-0.0015	-0.0008	-0.0004	0.0002	-0.0008	-0.0003	-0.0005	0.0003	0.0024	-0.0003	0.0017	0.0014	-0.0006	-0.0011	0.0021	0.0006	0.001	0.0028	0.0016	0.0033	0.0006	0.0066	0.0035	-0.0025	0.0001	0.0014	0.0002	-0.0029	-0.0015	0	-0.0009	0	-0.0003	-0.0017	-0.0017	-0.0001
	50027009	-0.0043	-0.0004	-0.0001	-0.0001	0.0003	0.0002	0.0002	-0.0017	-0.0016	-0.0014	-0.003	0.0016	-0.0052	-0.0003	-0.0001	0.0031	-0.0008	0.0006	0.0027	-0.0002	0.0009	0.0005	0.0013	0.001	-0.0004	-0.003	0.0007	0.0064	0.0028	0.0082	0.0081	0.0082	0.0103	0.0147	0.0032	-0.01	0.001	0.0002	0.0042	-0.0024	-0.0007	0.0004	-0.0006	-0.002	-0.001	-0.0008	0.0001	0.0001
		0.1	0.1	0.1	0.1	0.1	0.1	0.1	0.1	0.1	0.1	0.1	0.1	0.1	0.1	0.1	0.1	0.1	0.1	0.1	0.1	0.1	0.1	0.1	0.1	0.1	0.1	0.1	0.1	0.1	0.1	0.1	0.1	0.1	0.1	0.1	0.1	0.1	0.1	0.1	0.1	0.1	0.1	0.1	0.1	0.1	0.1	0.1	0.1
H7	Dilution Factor	377 = 054	378	379	UR	LR	UL	LL	O	380	381	382	UR	LR	UL	LL	O	383	384 = 053	385 = 052	UR	LR	UL	LL	O	386	387	388	UR	LR	UL	LL	O	389	390 = 055	391 = 056	UR	LR	UL	LL	O	392	393	394	UR	LR	UL	LL	O
	50	0.2227	0.0382	0.036	0.0441	0.1734	0.1746	0.0162	0.0277	0.394	0.3601	0.2073	0.0334	0.0424	0.0723	0.1289	0.1463	0.0414	0.3733	0.4604	0.5233	0.2691	0.1794	0.2278	0.3125	0.7906	0.5513	0.6621	0.5944	0.4812	0.6959	0.7496	0.667	0.3153	0.1449	0.526	0.5425	0.083	0.1014	0.3524	0.2181	0.0413	0.256	0.2331	0.4074	0.4854	0.2957	0.7068	0.3853
	500	0.0706	0.0028	0.0018	0.0033	0.0344	0.0448	0.0007	0.0034	0.1286	0.0834	0.0468	0.0051	0.0027	0.009	0.0456	0.0333	0.0054	0.0701	0.1205	0.2915	0.112	0.0371	0.0434	0.1204	0.3243	0.1668	0.2766	0.2016	0.1374	0.3537	0.3457	0.3152	0.0754	0.0417	0.1418	0.1863	0.0161	0.031	0.097	0.0468	0.0042	0.0492	0.0829	0.1339	0.1426	0.0673	0.3089	0.1815
	5001	0.0075	-0.0006	-0.0006	0	0.0059	0.0063	0	0	0.0177	0.0106	0.0072	-0.0003	-0.0015	0.0007	0.0063	0.0031	-0.0011	0.0061	0.015	0.0493	0.017	0.0004	0.0034	0.0135	0.0521	0.0218	0.0473	0.0274	0.0171	0.0651	0.0577	0.0609	0.0142	0.0129	0.0165	0.028	0.0017	0.006	0.0124	0.0069	-0.0015	0.0048	0.0141	0.0195	0.0209	0.0081	0.0518	0.036
	50014	-0.0014	-0.0003	0.0013	0.0006	0.0001	-0.0003	0.001	-0.0006	0.0003	0.001	0.0014	0.0003	-0.0001	-0.0002	-0.0011	-0.0001	-0.0002	0.0003	0.0009	0.0035	0.0007	-0.0029	-0.0023	0.0027	0.0049	0.0015	0.0037	-0.0003	0.0008	0.0044	0.0015	0.005	0.0002	0.0063	0.0021	0.0184	0.0008	0.0008	0.0009	0.0011	-0.0007	0.0008	-0.0004	0.0009	0.0009	-0.0008	0.0048	0.0029
	500180	-0.001	0.0006	-0.0019	0	-0.0007	-0.0005	0.0014	-0.0005	-0.0008	0	0.0003	0.0005	-0.0002	0.0007	-0.0009	-0.0005	-0.0016	0.0018	0.0012	-0.0008	-0.0004	0.0025	-0.0021	0.0005	0.0033	-0.001	0.0007	-0.0016	-0.0011	-0.0031	-0.0038	0.0001	-0.0001	0.0049	-0.0009	-0.0024	0.0009	0.0055	0.0023	0.0007	-0.0015	0.0012	-0.0009	-0.0008	-0.001	-0.0021	0.0001	-0.0012
	5002251	-0.0023	0.0005	0.0012	-0.0001	0.0001	0.0001	0.0008	-0.0004	-0.001	-0.0002	0	0.0001	0.0013	0.0018	0.0004	0.0002	-0.0007	-0.0003	0.0002	-0.0003	-0.0008	-0.0025	-0.0018	0.001	-0.0012	-0.0003	-0.0003	-0.0037	-0.0005	-0.0039	-0.0054	-0.0008	0.0008	0.0066	-0.0056	-0.0016	-0.001	0.0014	-0.0001	-0.0008	-0.0013	0.0006	-0.0001	-0.0003	0.0001	-0.0011	0.0005	-0.0015
	50027009	0.0008	0.001	-0.0005	0.0003	0.0002	0.0002	0.001	-0.0006	-0.0004	0.0015	0.001	0.0023	-0.0008	0.0008	-0.0009	0.0007	0.0003	-0.0002	0.0006	-0.0014	-0.0006	-0.0013	-0.0017	-0.0002	0.0005	-0.0007	-0.0004	-0.0021	-0.0011	-0.0043	-0.0034	-0.0004	0.0027	0.0086	0.0002	0.0024	0.0001	0.0005	0.0007	0.0003	-0.0008	-0.0015	-0.0015	-0.0011	-0.001	-0.0003	0.001	-0.0003
		0.1	0.1	0.1	0.1	0.1	0.1	0.1	0.1	0.1	0.1	0.1	0.1	0.1	0.1	0.1	0.1	0.1	0.1	0.1	0.1	0.1	0.1	0.1	0.1	0.1	0.1	0.1	0.1	0.1	0.1	0.1	0.1	0.1	0.1	0.1	0.1	0.1	0.1	0.1	0.1	0.1	0.1	0.1	0.1	0.1	0.1	0.1	0.1
H9	Dilution Factor	377 = 054	378	379	UR	LR	UL	LL	O	380	381	382	UR	LR	UL	LL	O	383	384 = 053	385 = 052	UR	LR	UL	LL	O	386	387	388	UR	LR	UL	LL	O	389	390 = 055	391 = 056	UR	LR	UL	LL	O	392	393	394	UR	LR	UL	LL	O
	50	0.4218	0.018	0.0121	0.0676	0.5748	0.5205	0.0926	0.0167	0.6354	0.0608	0.8094	0.2305	0.0211	0.0347	0.1793	0.5234	0.0186	0.3566	0.6098	0.4141	0.1325	0.0491	0.1866	0.04	0.8825	0.1258	0.0218	0.0795	0.4067	0.5882	0.7458	0.189	0.9216	0.905	0.9032	0.9577	0.8693	0.942	0.9003	0.89	0.3187	0.7917	0.8532	0.8477	0.8722	0.8728	0.8834	0.8766
	500	0.144	-0.0002	-0.0022	0.0093	0.1634	0.1875	0.0138	0.0011	0.2705	0.0066	0.5203	0.0372	0.0003	0.0008	0.0305	0.1736	0.0017	0.0605	0.2503	0.1397	0.0186	0.0003	0.0163	0.0042	0.4431	0.0153	-0.0019	0.0072	0.097	0.1968	0.4126	0.0254	0.7725	0.7104	0.7165	0.7825	0.4788	0.7552	0.7541	0.7575	0.0682	0.4566	0.5339	0.6775	0.7416	0.7399	0.7483	0.7514
	5001	0.016	-0.0016	-0.0013	-0.0001	0.016	0.0298	0.0017	0.0015	0.0389	-0.0009	0.1521	0.0039	-0.0007	-0.0013	0.0025	0.0229	-0.0009	0.0065	0.0362	0.0153	0.0004	-0.0047	0.0004	-0.0002	0.0832	-0.0017	-0.0039	-0.002	0.0056	0.0193	0.0985	-0.0009	0.38	0.293	0.294	0.357	0.1041	0.3294	0.3247	0.3464	0.0057	0.0907	0.1423	0.263	0.3492	0.3234	0.3393	0.4446
	50014	0.0007	0.0001	-0.0009	-0.0004	-0.0008	0.0016	-0.0012	-0.002	0.0034	-0.0005	0.0165	0.0005	0.0003	0.0012	0.0015	0.0027	-0.0005	0.0001	0.0027	0.0006	-0.0011	-0.005	-0.0012	0.0002	0.0084	-0.0018	-0.0028	-0.0028	-0.0051	0.0007	0.0109	-0.0022	0.0739	0.0489	0.0426	0.0875	0.011	0.0562	0.058	0.0633	0.0013	0.0049	0.0153	0.0404	0.0696	0.0589	0.0575	0.0979
	500180	0.0001	0.0006	0.0002	0.0012	-0.0016	-0.0001	0.0003	0.0031	-0.0001	-0.0007	-0.0004	0.0005	0.0017	0	0.002	0.0004	-0.0004	0.0011	0.0004	0.0006	-0.0005	-0.0038	0.0019	0.0007	0.0013	-0.0017	-0.002	0.0002	-0.0053	-0.0005	0.0018	-0.0013	0.01	0.0062	0.0034	0.0099	0.0018	0.012	0.0098	0.0075	-0.0015	-0.0041	0.0031	0.0052	0.0091	0.0058	0.0087	0.0106
	5002251	-0.0012	-0.0009	0.0101	-0.0006	-0.001	0.0003	-0.0004	0.0006	-0.0002	0.0007	0.0036	0.0011	0.0004	0.0001	0.0013	-0.0005	0.0002	0.0006	0	-0.0003	-0.0001	-0.0026	-0.0004	0.0004	0.001	-0.0017	-0.0002	0.0013	-0.0054	0.0011	0.0001	-0.0007	0.0013	0.0002	0.0005	-0.0039	0.0012	0.0042	0.0015	0.002	0.0017	-0.0035	0.0001	0.0024	0.0038	0.0043	0.0039	0.0034
	50027009	-0.0005	0.0002	-0.0003	0.0001	-0.0008	-0.0001	0.0049	-0.0009	-0.0007	0.0014	-0.0002	0.0031	0.001	0.0002	0.0008	0.0009	0.0011	0.0017	0.0009	0.0006	0.0007	-0.0039	0.0002	0.0011	0.0012	-0.0012	0.0003	-0.0011	-0.0028	-0.0001	0.0018	0.0008	0.0015	0.0026	-0.0003	0.0041	0.0069	0.0005	0.0023	0.0014	0.0008	-0.0024	0.0032	0.003	0.0025	0.0019	0.0017	-0.0067
		0.1	0.1	0.1	0.1	0.1	0.1	0.1	0.1	0.1	0.1	0.1	0.1	0.1	0.1	0.1	0.1	0.1	0.1	0.1	0.1	0.1	0.1	0.1	0.1	0.1	0.1	0.1	0.1	0.1	0.1	0.1	0.1	0.1	0.1	0.1	0.1	0.1	0.1	0.1	0.1	0.1	0.1	0.1	0.1	0.1	0.1	0.1	0.1
B	Dilution Factor	377 = 054	378	379	UR	LR	UL	LL	O	380	381	382	UR	LR	UL	LL	O	383	384 = 053	385 = 052	UR	LR	UL	LL	O	386	387	388	UR	LR	UL	LL	O	389	390 = 055	391 = 056	UR	LR	UL	LL	O	392	393	394	UR	LR	UL	LL	O
	50	0.0182	0.0163	0.0104	0.0136	0.1218	0.0119	0.0093	0.0223	0.0165	0.0414	0.1937	0.028	0.0153	0.0204	0.0159	0.0351	0.0191	0.3019	0.2184	0.039	0.0289	0.0318	0.0656	0.026	0.1564	0.0199	0.013	0.0503	0.0313	0.0208	0.0106	0.0134	0.0576	0.0364	0.4569	0.0697	0.0293	0.0256	0.0271	0.0441	0.0139	0.075	0.5373	0.6593	0.7121	0.8932	0.8342	0.7003
	500	0.0019	0.001	0.0013	0.0023	0.0146	0.0003	0.002	0.0046	0.0027	0.0148	0.024	0.0044	0.0016	0.0022	-0.0007	0.0044	0.0018	0.0588	0.04	0.0093	0.0109	0.0101	0.0146	0.0088	0.0113	0.0049	-0.0017	0.0039	0.0046	0.0039	-0.0053	0.0047	0.0048	0.0045	0.105	0.0307	0.0086	0.0031	0.0066	0.0061	-0.0002	0.0062	0.1541	0.2445	0.2885	0.5987	0.4707	0.2502
	5001	-0.0005	-0.0008	0.0001	-0.0007	-0.0001	-0.0017	0.0008	0.0004	0.0006	0.0034	0.0033	0.0038	-0.001	-0.0005	-0.0028	0.0002	-0.0015	0.0074	0.0027	0.0009	0.0026	0.0035	0.0059	0.0017	-0.0068	-0.0012	-0.0041	-0.0037	-0.0013	-0.0036	-0.0084	-0.0078	-0.0058	-0.0021	0.0065	0.0026	0.0016	-0.0012	0	0.0005	-0.0026	-0.0012	0.0206	0.0345	0.0516	0.166	0.1045	0.0407
	50014	0.0012	0.0012	-0.0004	-0.0007	-0.0027	-0.0005	0.0003	-0.0009	0.0001	0.0002	-0.0009	-0.0018	0.0014	-0.0005	-0.0017	0.0018	-0.0003	0.0005	0.0012	-0.0009	0.0029	0.0018	0.0024	0.0035	-0.0097	0.0017	-0.0008	-0.0018	-0.0007	-0.002	-0.0074	-0.0048	-0.0055	-0.0012	-0.0016	0.0109	0.0011	0.0009	-0.0003	0.0003	-0.0014	-0.0006	0.0014	0.0034	0.0042	0.0235	0.0122	0.0051
	500180	0.0023	-0.0005	-0.0003	-0.0012	-0.0029	-0.0001	0.0006	-0.0014	-0.0015	-0.0005	0.0037	-0.0021	0.0005	-0.0004	-0.001	0.0016	0.001	0.0004	0.0015	0.0009	0.0026	0.001	0.0011	0.0023	-0.0084	0.0001	-0.0014	-0.0033	-0.0002	0.001	-0.0042	-0.0032	-0.0018	0.0025	0.0056	0.0072	0.0019	-0.0004	0.0002	-0.0001	-0.0019	-0.0009	0.0004	-0.0009	-0.0026	0.0023	0.002	0.0002
	5002251	-0.0009	0.0008	-0.0003	-0.0008	-0.0022	0.0005	0.0006	0	-0.0004	-0.0002	-0.0016	-0.002	-0.0018	0.0008	0	0.0023	0.0019	0.002	0.0028	-0.0001	0.0009	0.001	0.0025	0.0013	-0.0081	-0.0006	-0.001	-0.0018	-0.0024	0.0044	-0.0038	-0.0042	-0.0048	0.004	0	-0.001	-0.0006	-0.0001	0.0011	0.0005	-0.0005	-0.0006	-0.0006	0.0004	-0.0019	0	0.0006	-0.0002
	50027009	0.0015	-0.0001	0.0004	0.0014	-0.0017	0.0001	0.0014	-0.0007	-0.0003	0.003	0.0012	-0.002	-0.0003	0.0014	-0.0011	0	0.0027	0.0015	0.0017	0.0003	0.0024	0.0016	0.0028	0.0013	-0.0077	-0.0005	0.0004	-0.0013	0.0001	0.0028	-0.0054	-0.0034	-0.0034	0.0033	-0.0026	0.0084	-0.0007	0.0012	0.0082	-0.0002	0.0013	0.0004	-0.0003	-0.0003	-0.0023	0.0004	0.0018	-0.0004
		0.1	0.1	0.1	0.1	0.1	0.1	0.1	0.1	0.1	0.1	0.1	0.1	0.1	0.1	0.1	0.1	0.1	0.1	0.1	0.1	0.1	0.1	0.1	0.1	0.1	0.1	0.1	0.1	0.1	0.1	0.1	0.1	0.1	0.1	0.1	0.1	0.1	0.1	0.1	0.1	0.1	0.1	0.1	0.1	0.1	0.1	0.1	0.1
H3HK68	Dilution Factor	377 = 054	378	379	UR	LR	UL	LL	O	380	381	382	UR	LR	UL	LL	O	383	384 = 053	385 = 052	UR	LR	UL	LL	O	386	387	388	UR	LR	UL	LL	O	389	390 = 055	391 = 056	UR	LR	UL	LL	O	392	393	394	UR	LR	UL	LL	O
	50	0.6896	0.3409	0.2554	0.7478	0.5923	0.4137	0.4133	0.3643	0.762	0.7717	0.6449	0.7841	0.6657	0.8032	0.6445	0.796	0.5977	0.7544	0.7835	0.7955	0.7958	0.7787	0.7883	0.6901	0.5985	0.6931	0.5631	0.672	0.7555	0.7657	0.6881	0.6739	0.6825	0.6165	0.6315	0.7196	0.7663	0.7443	0.6737	0.7654	0.7282	0.6832	0.7419	0.7287	0.7411	0.7013	0.8071	0.7023
	500	0.3965	0.0926	0.0612	0.499	0.39	0.1181	0.2002	0.0892	0.5194	0.7154	0.4729	0.6305	0.4397	0.6248	0.3894	0.6346	0.4149	0.5963	0.5774	0.7187	0.6393	0.5718	0.6767	0.5324	0.3282	0.4503	0.3171	0.4646	0.6667	0.5765	0.4361	0.4192	0.4651	0.3809	0.3375	0.5802	0.4907	0.4318	0.4038	0.62	0.5034	0.3928	0.5563	0.4688	0.5916	0.4551	0.6774	0.4383
	5001	0.1184	0.0161	0.0068	0.1554	0.1139	0.0248	0.0448	0.014	0.1758	0.5206	0.1615	0.302	0.1747	0.279	0.1014	0.3218	0.1374	0.2814	0.2207	0.442	0.2977	0.2326	0.3902	0.2725	0.0698	0.133	0.084	0.1472	0.3641	0.2114	0.1268	0.1093	0.1429	0.1084	0.0809	0.2868	0.1346	0.1037	0.1081	0.2588	0.1569	0.0987	0.2209	0.1529	0.293	0.149	0.3142	0.1116
	50014	0.0155	0.0016	0.0001	0.023	0.0219	0.0046	0.0064	0	0.0245	0.1754	0.0281	0.0521	0.0333	0.0535	0.0137	0.0714	0.0212	0.0585	0.0373	0.1199	0.0648	0.0435	0.0882	0.0591	0.008	0.026	0.0116	0.0306	0.0895	0.0345	0.0213	0.0205	0.0214	0.0126	0.0106	0.062	0.012	0.0039	0.0143	0.046	0.025	0.0147	0.0362	0.0171	0.0605	0.0211	0.0543	0.0135
	500180	0.0019	0.0014	0.0001	0.0035	0.001	0.0077	0.003	-0.0009	0.0035	0.037	-0.0003	0.0008	0.0042	0.0064	-0.0003	0.0114	0.0005	0.007	0.0044	0.0197	0.0073	0.0046	0.0126	0.0063	0.004	0.0045	0.0031	0.0054	0.013	0.004	0.0052	0.0044	0.0018	-0.0022	0.0126	0.0178	0.0021	-0.0017	0.0014	0.0144	-0.0004	0.0027	0.009	0.0017	0.0101	-0.0034	0.0017	-0.0081
	5002251	-0.0004	0	-0.0017	0.0004	0.0009	0.001	0.0032	0.0014	-0.0006	0.0095	-0.0014	0.0013	-0.0004	0.0068	-0.0016	0.0016	-0.0024	-0.0009	-0.0017	0.0019	0.0003	-0.0023	0.0005	-0.001	-0.0013	0.0041	0.0021	-0.0002	0.0049	0.0029	0.0024	0.0057	0.0054	-0.0012	0.0012	-0.0012	-0.0014	-0.0021	-0.0012	0.0041	-0.0006	0.0011	-0.0035	-0.0107	0.0019	-0.0002	-0.0036	-0.0038
	50027009	-0.001	-0.0006	-0.001	0.0008	-0.0026	-0.0005	-0.0008	-0.0016	-0.0003	0.0093	-0.0009	-0.0007	-0.0008	0.0006	-0.0015	0.0007	-0.0019	-0.0003	-0.0009	-0.0007	-0.0022	-0.0007	-0.0016	-0.0037	0.0021	0.0008	0.0035	0.0048	0.0067	0.0038	0.0005	-0.0001	-0.0015	-0.0017	0.002	-0.0052	-0.0021	-0.0005	0.0003	0.0051	-0.0052	0.0005	0.0081	-0.0031	-0.0023	-0.0039	-0.0047	-0.0053
		0.1	0.1	0.1	0.1	0.1	0.1	0.1	0.1	0.1	0.1	0.1	0.1	0.1	0.1	0.1	0.1	0.1	0.1	0.1	0.1	0.1	0.1	0.1	0.1	0.1	0.1	0.1	0.1	0.1	0.1	0.1	0.1	0.1	0.1	0.1	0.1	0.1	0.1	0.1	0.1	0.1	0.1	0.1	0.1	0.1	0.1	0.1	0.1
H1SI06	Dilution Factor	377 = 054	378	379	UR	LR	UL	LL	O	380	381	382	UR	LR	UL	LL	O	383	384 = 053	385 = 052	UR	LR	UL	LL	O	386	387	388	UR	LR	UL	LL	O	389	390 = 055	391 = 056	UR	LR	UL	LL	O	392	393	394	UR	LR	UL	LL	O
	50	0.5265	0.0282	0.0124	0.49	0.4372	0.4105	0.4221	0.1138	0.5209	0.7111	0.2263	0.2825	0.1522	0.4827	0.2688	0.1435	0.0451	0.4769	0.6726	0.6255	0.4334	0.4984	0.4774	0.5543	0.3433	0.5936	0.4095	0.5679	0.153	0.5303	0.4019	0.4791	0.5666	0.5833	0.4156	0.4972	0.1157	0.4096	0.5311	0.4414	0.3553	0.2597	0.2399	0.388	0.3006	0.2433	0.3855	0.4984
	500	0.2609	0.0057	0.0014	0.2513	0.1901	0.1338	0.1901	0.0269	0.2401	0.62	0.0765	0.0777	0.0281	0.2002	0.0766	0.0277	0.0089	0.1648	0.3779	0.4179	0.1965	0.2745	0.2179	0.4578	0.0906	0.3857	0.2745	0.293	0.0471	0.2883	0.1476	0.2044	0.3441	0.2546	0.1461	0.2764	0.0498	0.1653	0.238	0.161	0.1112	0.0756	0.067	0.1585	0.135	0.065	0.1238	0.1852
	5001	0.0596	0.0042	0.002	0.0628	0.0413	0.0254	0.0389	0.0054	0.0459	0.3221	0.0158	0.0148	0.0043	0.0368	0.0108	0.0045	0.0014	0.0288	0.0868	0.1463	0.038	0.0682	0.0473	0.2349	0.0188	0.1162	0.0837	0.0717	0.0113	0.0729	0.0275	0.033	0.0967	0.0628	0.0315	0.0866	0.0135	0.0249	0.0479	0.0318	0.0233	0.0081	0.0109	0.0354	0.0312	0.0061	0.0214	0.037
	50014	0.0068	-0.0009	0.0022	0.0071	0.006	0.0021	0.005	-0.0012	0.0043	0.0727	-0.0002	0.0015	0.0049	0.0048	0.0022	0.0032	0.0013	0.0039	0.011	0.0235	0.005	0.0117	0.0091	0.0559	0.003	0.0182	0.0183	0.0159	0.0051	0.0104	0.0033	-0.0001	0.015	0.0096	0.006	0.0235	0.0103	0.0006	0.0074	0.0022	0.0023	0	-0.0082	0.0014	0.0081	0.0016	0.0007	0.0067
	500180	-0.0001	0.003	-0.0028	-0.0008	-0.0022	-0.0002	0.0029	-0.0006	-0.0007	0.0108	-0.0001	0.001	0.0018	-0.0009	-0.0019	-0.0033	-0.0025	-0.0003	0.0009	0.0019	0.0044	0.0025	0.0031	0.0099	0.0008	0.0039	0.0034	0.0005	0.0004	0.0049	0.005	-0.0024	0.0099	0.0038	-0.0008	0.0088	0.0086	-0.0039	0.0047	-0.0012	-0.0017	-0.0026	-0.0002	0.0028	0.006	0.0008	0.0002	0.0008
	5002251	-0.0004	0.0014	0.0012	-0.0005	0.0014	-0.0001	0.0002	-0.0007	-0.0007	0.0017	-0.0017	-0.0009	-0.001	-0.0031	-0.0031	-0.0038	-0.0008	0.0005	0.0003	0.0004	0.0006	0.0012	0.0034	0.0049	0.0005	0.0002	-0.002	-0.0024	0.0022	0.0023	0.0036	-0.0016	0.0033	0.0074	0.0073	0.0061	0.0082	-0.0119	-0.0003	-0.0041	-0.0027	-0.0029	-0.0032	0.0035	0.005	0.0008	0.0008	0.0006
	50027009	-0.0012	-0.0008	0.0029	0.0004	-0.0003	-0.0009	0.0006	-0.0008	-0.0012	0.0018	0.0014	-0.0015	0.0015	-0.0011	-0.0001	-0.0021	0.0063	0.0008	-0.0006	-0.0032	0	0.0005	0.0011	0.0004	-0.0001	-0.0007	-0.0019	-0.0003	0.0011	0.0037	0.0158	-0.0036	0.0001	0.0009	-0.0014	0.0027	0.003	-0.0076	0.0007	0.001	0.0019	-0.009	-0.0035	-0.0068	0.0079	0.0032	0.0003	-0.0001
		0.1	0.1	0.1	0.1	0.1	0.1	0.1	0.1	0.1	0.1	0.1	0.1	0.1	0.1	0.1	0.1	0.1	0.1	0.1	0.1	0.1	0.1	0.1	0.1	0.1	0.1	0.1	0.1	0.1	0.1	0.1	0.1	0.1	0.1	0.1	0.1	0.1	0.1	0.1	0.1	0.1	0.1	0.1	0.1	0.1	0.1	0.1	0.1
[truncated: 12 more columns]

## Sheet: EPTs
	H1 MI-15								H2 JP-57								H3 KS-17								H4 NB-10								H5 VN-04								H7 SH-13								H9 GD-16
3mer	3733.27	1181.28	1550.57	3311.62	2496.23	1607.71	1326.4	10374	9233.19	836.997	2745.4	2726.79	8257.2	16889.9	3898.12	10394.2	5157.84	2360	4960.25	5410.74	36291.6	12229.5	1136.77	21385.2	14195.8	1752.15	2235.95	13241.4	40933.1	13893.5	9658.27	9238.14	706.569	43.8202	139.273	500.007	989.751	418.445	2043.58	263.134	311.879	50	50	50	115.358	157.959	50	50	779.862
4mer	3596.51	5280.99	675.956	1222.66	1949.96	641.971	1668.53	1144.65	4224.82	15827	6879.27	1866.48	462.607	6795.41	6989.68	4758.69	6138.05	48445	22498.1	9382.86	3653.16	6844.92	15051.7	21693.4	53748.5	610197	78087.3	61859.2	32383	272105	160762	513686	830.371	5757.66	2912.33	1084.88	390.135	2207.62	927.537	1099.25	698.667	400.626	177.156	50	50	50	118.738	119.501	1809.09
5mer	1772.57	7149.39	1954.3	5861.42	5595.32	5118.44	2945.9	6821.39	677.864	11424.9	7501.95	21385.2	14693.6	14155.9	40422.7	27313.9	2868.21	12126.9	9573.5	17793	34679.6	28016.8	33849.7	13272.3	183943	122845	71804.8	427881	252787	140050	518642	230012	228.025	10141.3	7884.41	7749.13	39441.9	19358.9	21816	21476.7	50	345.902	625.911	2310.82	594.865	194.774	186.345	634.805	50
6mer	1309.85	1838.53	858.011	2436.17	770.432	1136.71	1135.9	4760.76	4711.9	1124.92	17835.9	11685.1	8288.31	13190.4	8782.39	10098.1	10137.3	13707.3	5222.22	27592.8	35124.7	28802.4	5899.86	4219.96	18596.2	67072.6	39354.7	269973	290397	169598	107664	145549	3165.64	3564.35	14633.4	16043.4	7270.89	26437.5	4963.38	12295.5	2363.42	944.818	2046.77	1224.19	740.458	3059.26	2707.71	2696.61	4003.94
7mer	780.164	263.834	258.465	557.844	744.496	1676.81	1778.42	1672.62	23062.8	5250.93	1870.25	11084.2	1588.56	3121.27	1256.42	2450.89	4341.52	6031.5	10919.9	11887.2	3400.12	6645.13	6289.65	12779.2	93231.1	68939.3	39743.1	211700	28974.4	65265.4	193169	89981.4	19640.1	7207.31	6042.77	11787	4810.71	7436.13	4935.17	7164.99	336.586	110.779	762.97	1168.86	31.1487	52.5577	481.401	180.833	37831.3
8mer	1025.17	149.43	436.492	420.536	3989.97	552.624	804.693	2009.35	1976.62	1054.75	3304.33	2481.93	2533.08	1807.62	1503.67	4729.62	3187.2	3068.11	6358.39	3741.19	12530	6282.12	6013.55	8558.2	29373.1	38120.7	78482.9	129192	266510	121848	171287	85841.2	5239.25	1000.07	1569.67	5736.45	6487.23	5231.92	5537.31	2520.37	50	223.729	370.797	742.689	797.262	303.25	2322.75	1312.62	333.662
BOAS NP	1776.92	6831.27	2697.05	27071.9	8607.65				1367.89	9041.62	9407.88	3382.85	7846.6				6238.49	8173.6	4183.46	4464.9	14581.1				99886	45814.2	27729.8	100657	31986				2221.63	4020.65	9545.63	7893.02	12737.9				134.764	866.185	671.77	1389.47	841.401				19829.2
Mix	50	50	50	830.513	50				50	3635.55	250.543	105.064	50				221.795	734.088	306.43	4153.27	751.062				226.584	320.484	514.495	2311.9	566.67				1032.98	3256.86	1765.91	3689.11	1571.29				55.4533	818.045	68.9944	5566.18	535.864				11980
** limit of detection = 50
log transformed:
	H1 MI-15								H2 JP-57								H3 KS-17								H4 NB-10								H5 VN-04								H7 SH-13								H9 GD-16
3mer	3.57209	3.07235	3.19049	3.52004	3.39729	3.20621	3.12268	4.01594	3.96535	2.92272	3.43861	3.43565	3.91683	4.22763	3.59086	4.01679	3.71247	3.37291	3.6955	3.73326	4.55981	4.08741	3.05567	4.33011	4.15216	3.24357	3.34946	4.12193	4.61207	4.14281	3.9849	3.96558	2.84915	1.64167	2.14387	2.69898	2.99553	2.62164	3.31039	2.42018	2.49399	1.69897	1.69897	1.69897	2.06205	2.19854	1.69897	1.69897	2.89202
4mer	3.55588	3.72272	2.82992	3.08731	3.29003	2.80752	3.22233	3.05867	3.62581	4.1994	3.83754	3.27102	2.66521	3.83222	3.84446	3.67749	3.78803	4.68525	4.35215	3.97234	3.56267	3.83537	4.17759	4.33633	4.73037	5.78547	4.89258	4.7914	4.51032	5.43474	5.20618	5.7107	2.91927	3.76025	3.46424	3.03538	2.59122	3.34392	2.96733	3.0411	2.84427	2.60274	2.24836	1.69897	1.69897	1.69897	2.07459	2.07737	3.25746
5mer	3.2486	3.85427	3.29099	3.768	3.74782	3.70914	3.46922	3.83387	2.83114	4.05785	3.87517	4.33011	4.16713	4.15094	4.60663	4.43638	3.45761	4.08375	3.98107	4.25025	4.54007	4.44742	4.52955	4.12295	5.26468	5.08936	4.85615	5.63132	5.40275	5.14628	5.71487	5.36175	2.35798	4.00609	3.89677	3.88925	4.59596	4.28688	4.33878	4.33197	1.69897	2.53895	2.79651	3.36377	2.77442	2.28953	2.27032	2.80264	1.69897
6mer	3.11722	3.26447	2.93349	3.38671	2.88673	3.05565	3.05534	3.67768	3.6732	3.05112	4.25129	4.06763	3.91847	4.12026	3.94361	4.00424	4.00592	4.13695	3.71785	4.4408	4.54561	4.45943	3.77084	3.62531	4.26942	4.82655	4.595	5.43132	5.46299	5.22942	5.03207	5.16301	3.50046	3.55198	4.16534	4.2053	3.86159	4.42222	3.69578	4.08975	3.37354	2.97535	3.31107	3.08785	2.8695	3.48562	3.4326	3.43082	3.60249
7mer	2.89219	2.42133	2.4124	2.74651	2.87186	3.22448	3.25003	3.2234	4.36291	3.72024	3.2719	4.0447	3.201	3.49433	3.09913	3.38932	3.63764	3.78043	4.03822	4.07508	3.53149	3.8225	3.79863	4.1065	4.96956	4.83847	4.59926	5.32572	4.46202	4.81468	5.28594	4.95415	4.29314	3.85777	3.78124	4.0714	3.68221	3.87135	3.6933	3.85522	2.5271	2.04446	2.88251	3.06776	1.49344	1.72064	2.68251	2.25728	4.57785
8mer	3.0108	2.17444	2.63998	2.6238	3.60097	2.74243	2.90563	3.30306	3.29592	3.02315	3.51908	3.39479	3.40365	3.25711	3.17715	3.67483	3.50341	3.48687	3.80335	3.57301	4.09795	3.79811	3.77913	3.93238	4.46795	4.58116	4.89478	5.11124	5.42571	5.08582	5.23372	4.9337	3.71927	3.00003	3.19581	3.75864	3.81206	3.71866	3.7433	3.40146	1.69897	2.34972	2.56914	2.87081	2.9016	2.4818	3.366	3.11814	2.52331
BOAS NP	3.24967	3.8345	3.43089	4.43252	3.93488				3.13605	3.95625	3.97349	3.52928	3.89468				3.79508	3.91241	3.62154	3.64981	4.16379				4.9995	4.661	4.44295	5.00284	4.50496				3.34667	3.6043	3.9798	3.89724	4.1051				2.12957	2.93761	2.82722	3.14285	2.925				4.29731
Mix	1.69897	1.69897	1.69897	2.91935	1.69897				1.69897	3.56057	2.39888	2.02145	1.69897				2.34595	2.86575	2.48633	3.61839	2.87568				2.35523	2.50581	2.71138	3.36397	2.75333				3.01409	3.5128	3.24697	3.56692	3.19626				1.74393	2.91278	1.83881	3.74556	2.72905				4.07846
[truncated: 31 more columns]
