# Supplementary material for: A modular platform to display multiple hemagglutinin subtypes on a single immunogen
Source: eLife. 2025 Dec 8;13:RP97364. doi: 10.7554/eLife.97364 (PMC12685301; doi:10.7554/eLife.97364)
Supplement: Figure 3—source data 1. [file elife-97364-fig3-data1.xlsx]

## Sheet: Figure 3B 3mer
		Individual Mice from each cohort
Time-course data	Cohort	3mer	3mer	3mer	3mer	3mer	3mer	3mer	3mer	3mer	3mer	3mer	3mer	3mer	3mer	3mer	3mer	3mer	3mer	3mer	3mer	3mer	3mer	3mer	3mer	3mer	3mer	3mer	3mer	3mer	3mer	3mer	3mer
	Individual Mouse	UL	LL	UR	LR	O	377 = 054	378	379	UL	LL	UR	LR	O	377 = 054	378	379	UL	LL	UR	LR	O	377 = 054	378	379	UL	LL	UR	LR	O	377 = 054	378	379
	Time point	d0	d0	d0	d0	d0	d0	d0	d0	d14	d14	d14	d14	d14	d14	d14	d14	d28	d28	d28	d28	d28	d28	d28	d28	d42	d42	d42	d42	d42	d42	d42	d42
	Dilution Factor
	50	0.0784	0.0718	0.0931	0.0553	0.0519	0.0526	0.052	0.088	0.5639	0.4989	0.525	0.6802	0.6588	0.6131	0.6559	0.6141	0.8024	0.7133	0.7872	0.8149	0.7809	0.7826	0.7453	0.8546	0.8336	0.74	0.824	0.7744	0.7246	0.7355	0.7232	0.8073
	500	0.0781	0.0682	0.0901	0.0493	0.0487	0.0475	0.0485	0.0574	0.3811	0.2897	0.4827	0.5229	0.4755	0.3035	0.514	0.4212	0.7591	0.6679	0.7056	0.7347	0.762	0.7402	0.6227	0.7323	0.7809	0.6042	0.7208	0.7554	0.728	0.7448	0.6826	0.7132
	5001	0.0825	0.0846	0.1012	0.0489	0.0461	0.0482	0.0478	0.0514	0.1477	0.1316	0.1807	0.3142	0.2526	0.1056	0.2879	0.2183	0.5099	0.3098	0.388	0.5795	0.6412	0.5905	0.3142	0.5803	0.6089	0.3295	0.4656	0.6771	0.6287	0.666	0.531	0.5449
	50014	0.1018	0.1039	0.1132	0.0485	0.0483	0.0454	0.0467	0.0465	0.1158	0.1179	0.1253	0.1073	0.084	0.0494	0.0782	0.0595	0.229	0.1639	0.1677	0.2551	0.308	0.2518	0.0773	0.2662	0.2554	0.1976	0.2218	0.4374	0.3768	0.3944	0.2462	0.3833
	500180	0.1113	0.1081	0.1147	0.0487	0.0478	0.0445	0.0453	0.0462	0.115	0.1179	0.1161	0.0579	0.051	0.0455	0.05	0.0585	0.142	0.1301	0.1319	0.0826	0.1001	0.0854	0.0519	0.0845	0.1642	0.1517	0.1643	0.1539	0.1299	0.1526	0.0886	0.1324
	5002251	0.118	0.1168	0.1205	0.0439	0.0417	0.0514	0.0465	0.0454	0.1199	0.1233	0.1236	0.0465	0.0459	0.0461	0.0486	0.0455	0.1234	0.1229	0.1289	0.055	0.0702	0.0519	0.0473	0.0564	0.1493	0.143	0.1394	0.0709	0.0691	0.0737	0.0518	0.052
	50027009	0.1201	0.1217	0.1288	0.0442	0.0453	0.0437	0.0442	0.0454	0.1226	0.1185	0.1249	0.0449	0.0455	0.0447	0.045	0.0424	0.1294	0.1309	0.1344	0.0685	0.0527	0.0474	0.048	0.0503	0.135	0.1459	0.1405	0.0574	0.0559	0.0557	0.0449	0.0393
2ndary only control (for blank subtraction)		0.1286	0.1225	0.1269	0.047	0.0451	0.045	0.0409	0.0413	0.1272	0.1283	0.1284	0.0467	0.0518	0.0442	0.0465	0.0392	0.141	0.1459	0.1367	0.049	0.0467	0.0473	0.0461	0.0471	0.1399	0.1358	0.1425	0.047	0.0476	0.0464	0.0466	0.0407
Background subtracted	Cohort	3mer	3mer	3mer	3mer	3mer	3mer	3mer	3mer	3mer	3mer	3mer	3mer	3mer	3mer	3mer	3mer	3mer	3mer	3mer	3mer	3mer	3mer	3mer	3mer	3mer	3mer	3mer	3mer	3mer	3mer	3mer	3mer
	Individual Mouse	UL	LL	UR	LR	O	377 = 054	378	379	UL	LL	UR	LR	O	377 = 054	378	379	UL	LL	UR	LR	O	377 = 054	378	379	UL	LL	UR	LR	O	377 = 054	378	379
	Time point	d0	d0	d0	d0	d0	d0	d0	d0	d14	d14	d14	d14	d14	d14	d14	d14	d28	d28	d28	d28	d28	d28	d28	d28	d42	d42	d42	d42	d42	d42	d42	d42
	Dilution Factor
	50	-0.0502	-0.0507	-0.0338	0.0083	0.0068	0.0076	0.0111	0.0467	0.4367	0.3706	0.3966	0.6335	0.607	0.5689	0.6094	0.5749	0.6614	0.5674	0.6505	0.7659	0.7342	0.7353	0.6992	0.8075	0.6937	0.6042	0.6815	0.7274	0.677	0.6891	0.6766	0.7666
	500	-0.0505	-0.0543	-0.0368	0.0023	0.0036	0.0025	0.0076	0.0161	0.2539	0.1614	0.3543	0.4762	0.4237	0.2593	0.4675	0.382	0.6181	0.522	0.5689	0.6857	0.7153	0.6929	0.5766	0.6852	0.641	0.4684	0.5783	0.7084	0.6804	0.6984	0.636	0.6725
	5001	-0.0461	-0.0379	-0.0257	0.0019	0.001	0.0032	0.0069	0.0101	0.0205	0.0033	0.0523	0.2675	0.2008	0.0614	0.2414	0.1791	0.3689	0.1639	0.2513	0.5305	0.5945	0.5432	0.2681	0.5332	0.469	0.1937	0.3231	0.6301	0.5811	0.6196	0.4844	0.5042
	50014	-0.0268	-0.0186	-0.0137	0.0015	0.0032	0.0004	0.0058	0.0052	-0.0114	-0.0104	-0.0031	0.0606	0.0322	0.0052	0.0317	0.0203	0.088	0.018	0.031	0.2061	0.2613	0.2045	0.0312	0.2191	0.1155	0.0618	0.0793	0.3904	0.3292	0.348	0.1996	0.3426
	500180	-0.0173	-0.0144	-0.0122	0.0017	0.0027	-0.0005	0.0044	0.0049	-0.0122	-0.0104	-0.0123	0.0112	-0.0008	0.0013	0.0035	0.0193	0.001	-0.0158	-0.0048	0.0336	0.0534	0.0381	0.0058	0.0374	0.0243	0.0159	0.0218	0.1069	0.0823	0.1062	0.042	0.0917
	5002251	-0.0106	-0.0057	-0.0064	-0.0031	-0.0034	0.0064	0.0056	0.0041	-0.0073	-0.005	-0.0048	-0.0002	-0.0059	0.0019	0.0021	0.0063	-0.0176	-0.023	-0.0078	0.006	0.0235	0.0046	0.0012	0.0093	0.0094	0.0072	-0.0031	0.0239	0.0215	0.0273	0.0052	0.0113
	50027009	-0.0085	-0.0008	0.0019	-0.0028	0.0002	-0.0013	0.0033	0.0041	-0.0046	-0.0098	-0.0035	-0.0018	-0.0063	0.0005	-0.0015	0.0032	-0.0116	-0.015	-0.0023	0.0195	0.006	0.0001	0.0019	0.0032	-0.0049	0.0101	-0.002	0.0104	0.0083	0.0093	-0.0017	-0.0014
Chose y = 0.1 as intersection point for interpolation of Sigmoid		0.1	0.1	0.1	0.1	0.1	0.1	0.1	0.1	0.1	0.1	0.1	0.1	0.1	0.1	0.1	0.1	0.1	0.1	0.1	0.1	0.1	0.1	0.1	0.1	0.1	0.1	0.1	0.1	0.1	0.1	0.1	0.1
Interpolation (for titers)	Cohort	3mer	3mer	3mer	3mer	3mer	3mer	3mer	3mer	3mer	3mer	3mer	3mer	3mer	3mer	3mer	3mer	3mer	3mer	3mer	3mer	3mer	3mer	3mer	3mer	3mer	3mer	3mer	3mer	3mer	3mer	3mer	3mer
	Individual Mouse	UL	LL	UR	LR	O	377 = 054	378	379	UL	LL	UR	LR	O	377 = 054	378	379	UL	LL	UR	LR	O	377 = 054	378	379	UL	LL	UR	LR	O	377 = 054	378	379
	Time point	d0	d0	d0	d0	d0	d0	d0	d0	d14	d14	d14	d14	d14	d14	d14	d14	d28	d28	d28	d28	d28	d28	d28	d28	d42	d42	d42	d42	d42	d42	d42	d42
		50	50	50	50	50	50	50	50	1537.84	821.526	3222.29	32114.8	16010.1	2406.04	20347.3	12784.4	41026.9	7997.46	16353.2	158704	218265	144149	19976.2	201479	63374.6	16949.7	40203.2	597424	400528	485944	154468	713588
Log transform of titers	Cohort	3mer	3mer	3mer	3mer	3mer	3mer	3mer	3mer	3mer	3mer	3mer	3mer	3mer	3mer	3mer	3mer	3mer	3mer	3mer	3mer	3mer	3mer	3mer	3mer	3mer	3mer	3mer	3mer	3mer	3mer	3mer	3mer
	Individual Mouse	UL	LL	UR	LR	O	377 = 054	378	379	UL	LL	UR	LR	O	377 = 054	378	379	UL	LL	UR	LR	O	377 = 054	378	379	UL	LL	UR	LR	O	377 = 054	378	379
	Time point	d0	d0	d0	d0	d0	d0	d0	d0	d14	d14	d14	d14	d14	d14	d14	d14	d28	d28	d28	d28	d28	d28	d28	d28	d42	d42	d42	d42	d42	d42	d42	d42
		1.69897	1.69897	1.69897	1.69897	1.69897	1.69897	1.69897	1.69897	3.18691	2.91462	3.50816	4.50671	4.2044	3.3813	4.30851	4.10668	4.61307	3.90295	4.2136	5.20059	5.33898	5.15881	4.30051	5.30423	4.80191	4.22916	4.60426	5.77628	5.60263	5.68659	5.18884	5.85345

## Sheet: Figure 3B 4mer
		Individual Mice from each cohort
Time-course data	Cohort	4mer	4mer	4mer	4mer	4mer	4mer	4mer	4mer	4mer	4mer	4mer	4mer	4mer	4mer	4mer	4mer	4mer	4mer	4mer	4mer	4mer	4mer	4mer	4mer	4mer	4mer	4mer	4mer	4mer	4mer	4mer	4mer
	Individual Mouse	UL	LL	UR	LR	O	380	381	382	UL	LL	UR	LR	O	380	381	382	UL	LL	UR	LR	O	380	381	382	UL	LL	UR	LR	O	380	381	382
	Time point	d0	d0	d0	d0	d0	d0	d0	d0	d14	d14	d14	d14	d14	d14	d14	d14	d28	d28	d28	d28	d28	d28	d28	d28	d42	d42	d42	d42	d42	d42	d42	d42
	Dilution Factor
	50	0.1297	0.105	0.0891	0.066	0.0648	0.0487	0.0535	0.0477	0.6521	0.7788	0.7737	0.7044	0.6697	0.6756	0.7409	0.7553	0.8421	0.8396	0.882	0.8201	0.8043	0.759	0.7308	0.7477	0.8841	0.8953	0.8744	0.7266	0.7208	0.6963	0.706	0.699
	500	0.1122	0.0998	0.0867	0.054	0.0506	0.0475	0.0477	0.0464	0.4868	0.6586	0.6365	0.5296	0.4797	0.5024	0.6352	0.6682	0.7895	0.8493	0.8594	0.801	0.7521	0.7665	0.7175	0.7519	0.8509	0.9311	0.8814	0.7223	0.7224	0.7286	0.7328	0.7346
	5001	0.1171	0.1087	0.0968	0.0503	0.0477	0.0469	0.0478	0.0471	0.1894	0.3297	0.2871	0.2279	0.1919	0.1945	0.3631	0.4249	0.5652	0.8443	0.6734	0.704	0.6456	0.713	0.6719	0.7386	0.8523	0.8091	0.8951	0.7227	0.7151	0.6688	0.7236	0.6896
	50014	0.1214	0.112	0.1109	0.0492	0.0483	0.0485	0.0482	0.0478	0.1257	0.1612	0.1417	0.0713	0.063	0.0588	0.0835	0.1152	0.2668	0.7127	0.3812	0.4632	0.4307	0.4806	0.4506	0.6463	0.7053	0.6078	0.6384	0.5737	0.6311	0.4679	0.5432	0.6098
	500180	0.1293	0.1225	0.1181	0.0512	0.0472	0.0479	0.0471	0.0474	0.1189	0.1214	0.1274	0.0507	0.049	0.0482	0.0533	0.057	0.1489	0.4686	0.1914	0.2058	0.2259	0.1856	0.1807	0.4395	0.4969	0.3052	0.38	0.2865	0.4154	0.1576	0.2067	0.3888
	5002251	0.1302	0.1269	0.1232	0.0491	0.0468	0.0478	0.0491	0.0476	0.1266	0.1291	0.1358	0.0475	0.0477	0.0476	0.0483	0.0491	0.1461	0.2359	0.154	0.1019	0.0786	0.0807	0.087	0.1969	0.3039	0.1853	0.2088	0.1152	0.2011	0.082	0.0895	0.2449
	50027009	0.1321	0.1303	0.1273	0.0483	0.0498	0.0508	0.0485	0.0482	0.1381	0.1328	0.136	0.0486	0.0478	0.0498	0.0497	0.0489	0.1433	0.1681	0.1434	0.0698	0.0574	0.057	0.0548	0.1157	0.3469	0.1637	0.1633	0.0719	0.0996	0.0624	0.0645	0.0968
2ndary only control (for blank subtraction)		0.1357	0.1316	0.1307	0.0488	0.0479	0.0495	0.0483	0.0488	0.1251	0.138	0.1376	0.0474	0.0482	0.0499	0.0506	0.048	0.1354	0.1565	0.1418	0.0494	0.0462	0.0454	0.0472	0.0476	0.151	0.1437	0.1437	0.0496	0.0511	0.0492	0.0525	0.0544
Background subtracted	Cohort	4mer	4mer	4mer	4mer	4mer	4mer	4mer	4mer	4mer	4mer	4mer	4mer	4mer	4mer	4mer	4mer	4mer	4mer	4mer	4mer	4mer	4mer	4mer	4mer	4mer	4mer	4mer	4mer	4mer	4mer	4mer	4mer
	Individual Mouse	UL	LL	UR	LR	O	380	381	382	UL	LL	UR	LR	O	380	381	382	UL	LL	UR	LR	O	380	381	382	UL	LL	UR	LR	O	380	381	382
	Time point	d0	d0	d0	d0	d0	d0	d0	d0	d14	d14	d14	d14	d14	d14	d14	d14	d28	d28	d28	d28	d28	d28	d28	d28	d42	d42	d42	d42	d42	d42	d42	d42
	Dilution Factor
	50	-0.006	-0.0266	-0.0416	0.0172	0.0169	-0.0008	0.0052	-0.0011	0.527	0.6408	0.6361	0.657	0.6215	0.6257	0.6903	0.7073	0.7067	0.6831	0.7402	0.7707	0.7581	0.7136	0.6836	0.7001	0.7331	0.7516	0.7307	0.677	0.6697	0.6471	0.6535	0.6446
	500	-0.0235	-0.0318	-0.044	0.0052	0.0027	-0.002	-0.0006	-0.0024	0.3617	0.5206	0.4989	0.4822	0.4315	0.4525	0.5846	0.6202	0.6541	0.6928	0.7176	0.7516	0.7059	0.7211	0.6703	0.7043	0.6999	0.7874	0.7377	0.6727	0.6713	0.6794	0.6803	0.6802
	5001	-0.0186	-0.0229	-0.0339	0.0015	-0.0002	-0.0026	-0.0005	-0.0017	0.0643	0.1917	0.1495	0.1805	0.1437	0.1446	0.3125	0.3769	0.4298	0.6878	0.5316	0.6546	0.5994	0.6676	0.6247	0.691	0.7013	0.6654	0.7514	0.6731	0.664	0.6196	0.6711	0.6352
	50014	-0.0143	-0.0196	-0.0198	0.0004	0.0004	-0.001	-0.0001	-0.001	0.0006	0.0232	0.0041	0.0239	0.0148	0.0089	0.0329	0.0672	0.1314	0.5562	0.2394	0.4138	0.3845	0.4352	0.4034	0.5987	0.5543	0.4641	0.4947	0.5241	0.58	0.4187	0.4907	0.5554
	500180	-0.0064	-0.0091	-0.0126	0.0024	-0.0007	-0.0016	-0.0012	-0.0014	-0.0062	-0.0166	-0.0102	0.0033	0.0008	-0.0017	0.0027	0.009	0.0135	0.3121	0.0496	0.1564	0.1797	0.1402	0.1335	0.3919	0.3459	0.1615	0.2363	0.2369	0.3643	0.1084	0.1542	0.3344
	5002251	-0.0055	-0.0047	-0.0075	0.0003	-0.0011	-0.0017	0.0008	-0.0012	0.0015	-0.0089	-0.0018	0.0001	-0.0005	-0.0023	-0.0023	0.0011	0.0107	0.0794	0.0122	0.0525	0.0324	0.0353	0.0398	0.1493	0.1529	0.0416	0.0651	0.0656	0.15	0.0328	0.037	0.1905
	50027009	-0.0036	-0.0013	-0.0034	-0.0005	0.0019	0.0013	0.0002	-0.0006	0.013	-0.0052	-0.0016	0.0012	-0.0004	-0.0001	-0.0009	0.0009	0.0079	0.0116	0.0016	0.0204	0.0112	0.0116	0.0076	0.0681	0.1959	0.02	0.0196	0.0223	0.0485	0.0132	0.012	0.0424
Chose y = 0.1 as intersection point for interpolation of Sigmoid		0.1	0.1	0.1	0.1	0.1	0.1	0.1	0.1	0.1	0.1	0.1	0.1	0.1	0.1	0.1	0.1	0.1	0.1	0.1	0.1	0.1	0.1	0.1	0.1	0.1	0.1	0.1	0.1	0.1	0.1	0.1	0.1
Interpolation (for titers)	Cohort	4mer	4mer	4mer	4mer	4mer	4mer	4mer	4mer	4mer	4mer	4mer	4mer	4mer	4mer	4mer	4mer	4mer	4mer	4mer	4mer	4mer	4mer	4mer	4mer	4mer	4mer	4mer	4mer	4mer	4mer	4mer	4mer
	Individual Mouse	UL	LL	UR	LR	O	380	381	382	UL	LL	UR	LR	O	380	381	382	UL	LL	UR	LR	O	380	381	382	UL	LL	UR	LR	O	380	381	382
	Time point	d0	d0	d0	d0	d0	d0	d0	d0	d14	d14	d14	d14	d14	d14	d14	d14	d28	d28	d28	d28	d28	d28	d28	d28	d42	d42	d42	d42	d42	d42	d42	d42
		50	50	50	50	50	50	50	50	3160.96	11482.7	7751.51	11632.2	8100.9	7850.22	24383.2	37532.4	71052.6	3.77809e+06	210383	1.21754e+06	1.4996e+06	815521	792870	1.40027e+07		1.20595e+06	2.15093e+06	2.21028e+06	1.06841e+07	572201	877270	1.49019e+07
Log transform of titers	Cohort	4mer	4mer	4mer	4mer	4mer	4mer	4mer	4mer	4mer	4mer	4mer	4mer	4mer	4mer	4mer	4mer	4mer	4mer	4mer	4mer	4mer	4mer	4mer	4mer	4mer	4mer	4mer	4mer	4mer	4mer	4mer	4mer
	Individual Mouse	UL	LL	UR	LR	O	380	381	382	UL	LL	UR	LR	O	380	381	382	UL	LL	UR	LR	O	380	381	382	UL	LL	UR	LR	O	380	381	382
	Time point	d0	d0	d0	d0	d0	d0	d0	d0	d14	d14	d14	d14	d14	d14	d14	d14	d28	d28	d28	d28	d28	d28	d28	d28	d42	d42	d42	d42	d42	d42	d42	d42
		1.69897	1.69897	1.69897	1.69897	1.69897	1.69897	1.69897	1.69897	3.49982	4.06004	3.88939	4.06566	3.90853	3.89488	4.38709	4.57441	4.85158	6.57727	5.32301	6.08549	6.17598	5.91144	5.8992	7.14621		6.08133	6.33263	6.34445	7.02874	5.75755	5.94313	7.17324

## Sheet: Figure 3B 5mer
		Individual Mice from each cohort
Time-course data	Cohort	5mer	5mer	5mer	5mer	5mer	5mer	5mer	5mer	5mer	5mer	5mer	5mer	5mer	5mer	5mer	5mer	5mer	5mer	5mer	5mer	5mer	5mer	5mer	5mer	5mer	5mer	5mer	5mer	5mer	5mer	5mer	5mer
	Individual Mouse	UL	LL	UR	LR	O	383	384 = 053	385 = 052	UL	LL	UR	LR	O	383	384 = 053	385 = 052	UL	LL	UR	LR	O	383	384 = 053	385 = 052	UL	LL	UR	LR	O	383	384 = 053	385 = 052
	Time point	d0	d0	d0	d0	d0	d0	d0	d0	d14	d14	d14	d14	d14	d14	d14	d14	d28	d28	d28	d28	d28	d28	d28	d28	d42	d42	d42	d42	d42	d42	d42	d42
	Dilution Factor
	50	0.0848	0.0996	0.1004	0.0523	0.0511	0.0482	0.0517	0.0487	0.6846	0.8092	0.7747	0.7551	0.8217	0.7365	0.8208	0.836	0.848	0.8642	0.8725	0.7787	0.7478	0.7781	0.7459	0.7266	0.8746	0.8736	0.901	0.7359	0.7151	0.7336	0.7186	0.7146
	500	0.0711	0.1002	0.0979	0.0482	0.0472	0.0459	0.0471	0.0475	0.6032	0.7835	0.7656	0.7464	0.6384	0.7099	0.7313	0.7219	0.8481	0.8364	0.8361	0.7896	0.7815	0.7815	0.8007	0.7685	0.8362	0.8802	0.9092	0.7877	0.7802	0.7796	0.7806	0.7753
	5001	0.0816	0.1104	0.1071	0.0469	0.0455	0.0465	0.0468	0.0462	0.2094	0.7195	0.5825	0.618	0.3973	0.5629	0.56	0.5785	0.8408	0.8654	0.8198	0.7679	0.6957	0.7216	0.7173	0.7323	0.8403	0.8389	0.8091	0.7595	0.7736	0.7636	0.6738	0.7076
	50014	0.1036	0.1116	0.1317	0.0462	0.0463	0.0461	0.046	0.0467	0.1304	0.3904	0.2091	0.3429	0.1372	0.2826	0.257	0.3035	0.5784	0.7914	0.562	0.6336	0.3825	0.5402	0.3887	0.5541	0.6446	0.565	0.4345	0.636	0.5873	0.6397	0.3325	0.3802
	500180	0.1124	0.1229	0.1229	0.0466	0.0461	0.0459	0.0459	0.047	0.1215	0.1945	0.1419	0.1139	0.0575	0.0952	0.0864	0.1044	0.378	0.5911	0.2874	0.3583	0.1206	0.2099	0.1264	0.2271	0.3736	0.3541	0.2358	0.3511	0.2804	0.3519	0.12	0.1339
	5002251	0.1219	0.123	0.1237	0.0473	0.0455	0.0622	0.0467	0.0464	0.126	0.1491	0.1342	0.0564	0.0468	0.0543	0.0544	0.0531	0.2388	0.2633	0.1748	0.1626	0.0656	0.0938	0.068	0.0964	0.2038	0.1817	0.574	0.144	0.115	0.1479	0.0674	0.0667
	50027009	0.1245	0.1235	0.1258	0.0463	0.0439	0.0537	0.0492	0.0492	0.1177	0.1324	0.1285	0.0523	0.0474	0.0494	0.0489	0.0485	0.1573	0.1744	0.1384	0.0797	0.0586	0.0601	0.0559	0.0649	0.1528	0.1433	0.1473	0.0821	0.0748	0.0815	0.0586	0.0547
2ndary only control (for blank subtraction)		0.1352	0.1305	0.1318	0.0472	0.0468	0.046	0.0455	0.0464	0.124	0.1319	0.1305	0.0457	0.0449	0.0465	0.0464	0.0468	0.1422	0.15	0.141	0.048	0.0527	0.0462	0.0468	0.0464	0.1461	0.1404	0.1483	0.0463	0.0458	0.0459	0.0455	0.0453
Background subtracted	Cohort	5mer	5mer	5mer	5mer	5mer	5mer	5mer	5mer	5mer	5mer	5mer	5mer	5mer	5mer	5mer	5mer	5mer	5mer	5mer	5mer	5mer	5mer	5mer	5mer	5mer	5mer	5mer	5mer	5mer	5mer	5mer	5mer
	Individual Mouse	UL	LL	UR	LR	O	383	384 = 053	385 = 052	UL	LL	UR	LR	O	383	384 = 053	385 = 052	UL	LL	UR	LR	O	383	384 = 053	385 = 052	UL	LL	UR	LR	O	383	384 = 053	385 = 052
	Time point	d0	d0	d0	d0	d0	d0	d0	d0	d14	d14	d14	d14	d14	d14	d14	d14	d28	d28	d28	d28	d28	d28	d28	d28	d42	d42	d42	d42	d42	d42	d42	d42
	Dilution Factor
	50	-0.0504	-0.0309	-0.0314	0.0051	0.0043	0.0022	0.0062	0.0023	0.5606	0.6773	0.6442	0.7094	0.7768	0.69	0.7744	0.7892	0.7058	0.7142	0.7315	0.7307	0.6951	0.7319	0.6991	0.6802	0.7285	0.7332	0.7527	0.6896	0.6693	0.6877	0.6731	0.6693
	500	-0.0641	-0.0303	-0.0339	0.001	0.0004	-0.0001	0.0016	0.0011	0.4792	0.6516	0.6351	0.7007	0.5935	0.6634	0.6849	0.6751	0.7059	0.6864	0.6951	0.7416	0.7288	0.7353	0.7539	0.7221	0.6901	0.7398	0.7609	0.7414	0.7344	0.7337	0.7351	0.73
	5001	-0.0536	-0.0201	-0.0247	-0.0003	-0.0013	0.0005	0.0013	-0.0002	0.0854	0.5876	0.452	0.5723	0.3524	0.5164	0.5136	0.5317	0.6986	0.7154	0.6788	0.7199	0.643	0.6754	0.6705	0.6859	0.6942	0.6985	0.6608	0.7132	0.7278	0.7177	0.6283	0.6623
	50014	-0.0316	-0.0189	-0.0001	-0.001	-0.0005	0.0001	0.0005	0.0003	0.0064	0.2585	0.0786	0.2972	0.0923	0.2361	0.2106	0.2567	0.4362	0.6414	0.421	0.5856	0.3298	0.494	0.3419	0.5077	0.4985	0.4246	0.2862	0.5897	0.5415	0.5938	0.287	0.3349
	500180	-0.0228	-0.0076	-0.0089	-0.0006	-0.0007	-0.0001	0.0004	0.0006	-0.0025	0.0626	0.0114	0.0682	0.0126	0.0487	0.04	0.0576	0.2358	0.4411	0.1464	0.3103	0.0679	0.1637	0.0796	0.1807	0.2275	0.2137	0.0875	0.3048	0.2346	0.306	0.0745	0.0886
	5002251	-0.0133	-0.0075	-0.0081	0.0001	-0.0013	0.0162	0.0012	0	0.002	0.0172	0.0037	0.0107	0.0019	0.0078	0.008	0.0063	0.0966	0.1133	0.0338	0.1146	0.0129	0.0476	0.0212	0.05	0.0577	0.0413	0.4257	0.0977	0.0692	0.102	0.0219	0.0214
	50027009	-0.0107	-0.007	-0.006	-0.0009	-0.0029	0.0077	0.0037	0.0028	-0.0063	0.0005	-0.002	0.0066	0.0025	0.0029	0.0025	0.0017	0.0151	0.0244	-0.0026	0.0317	0.0059	0.0139	0.0091	0.0185	0.0067	0.0029	-0.001	0.0358	0.029	0.0356	0.0131	0.0094
Chose y = 0.1 as intersection point for interpolation of Sigmoid		0.1	0.1	0.1	0.1	0.1	0.1	0.1	0.1	0.1	0.1	0.1	0.1	0.1	0.1	0.1	0.1	0.1	0.1	0.1	0.1	0.1	0.1	0.1	0.1	0.1	0.1	0.1	0.1	0.1	0.1	0.1	0.1
Interpolation (for titers)	Cohort	5mer	5mer	5mer	5mer	5mer	5mer	5mer	5mer	5mer	5mer	5mer	5mer	5mer	5mer	5mer	5mer	5mer	5mer	5mer	5mer	5mer	5mer	5mer	5mer	5mer	5mer	5mer	5mer	5mer	5mer	5mer	5mer
	Individual Mouse	UL	LL	UR	LR	O	383	384 = 053	385 = 052	UL	LL	UR	LR	O	383	384 = 053	385 = 052	UL	LL	UR	LR	O	383	384 = 053	385 = 052	UL	LL	UR	LR	O	383	384 = 053	385 = 052
	Time point	d0	d0	d0	d0	d0	d0	d0	d0	d14	d14	d14	d14	d14	d14	d14	d14	d28	d28	d28	d28	d28	d28	d28	d28	d42	d42	d42	d42	d42	d42	d42	d42
		50	50	50	50	50	50	50	50	4426.92	203530	39647.4	316835	57591.9	205482	180707	305629	2.94621e+06	6.31973e+06	827965	5.41286e+06	277475	1.14632e+06	293835	1.22981e+06	2.04139e+06	1.57967e+06		4.26247e+06	2.0884e+06	4.33301e+06	229706	291069
Log transform of titers	Cohort	5mer	5mer	5mer	5mer	5mer	5mer	5mer	5mer	5mer	5mer	5mer	5mer	5mer	5mer	5mer	5mer	5mer	5mer	5mer	5mer	5mer	5mer	5mer	5mer	5mer	5mer	5mer	5mer	5mer	5mer	5mer	5mer
	Individual Mouse	UL	LL	UR	LR	O	383	384 = 053	385 = 052	UL	LL	UR	LR	O	383	384 = 053	385 = 052	UL	LL	UR	LR	O	383	384 = 053	385 = 052	UL	LL	UR	LR	O	383	384 = 053	385 = 052
	Time point	d0	d0	d0	d0	d0	d0	d0	d0	d14	d14	d14	d14	d14	d14	d14	d14	d28	d28	d28	d28	d28	d28	d28	d28	d42	d42	d42	d42	d42	d42	d42	d42
		1.69897	1.69897	1.69897	1.69897	1.69897	1.69897	1.69897	1.69897	3.6461	5.30863	4.59821	5.50083	4.76036	5.31277	5.25698	5.48519	6.46926	6.8007	5.91801	6.73343	5.44322	6.0593	5.4681	6.08984	6.30993	6.19857		6.62966	6.31981	6.63679	5.36117	5.464

## Sheet: Figure 3B 6mer
		Individual Mice from each cohort
Time-course data	Cohort	6mer	6mer	6mer	6mer	6mer	6mer	6mer	6mer	6mer	6mer	6mer	6mer	6mer	6mer	6mer	6mer	6mer	6mer	6mer	6mer	6mer	6mer	6mer	6mer	6mer	6mer	6mer	6mer	6mer	6mer	6mer	6mer
	Individual Mouse	UL	LL	UR	LR	O	386	387	388	UL	LL	UR	LR	O	386	387	388	UL	LL	UR	LR	O	386	387	388	UL	LL	UR	LR	O	386	387	388
	Time point	d0	d0	d0	d0	d0	d0	d0	d0	d14	d14	d14	d14	d14	d14	d14	d14	d28	d28	d28	d28	d28	d28	d28	d28	d42	d42	d42	d42	d42	d42	d42	d42
	Dilution Factor
	50	0.0796	0.1248	0.0787	0.061	0.0632	0.0515	0.0538	0.0499	0.7591	0.7016	0.7021	1.0478	1.0118	1.0017	1.0249	1.0217	0.8735	0.85	0.8737	1.0908	1.0699	1.0486	1.0629	1.0407	0.9188	0.8765	0.8932	1.0185	1.0261	0.9986	1.0221	1.0487
	500	0.0718	0.1002	0.0799	0.0535	0.0525	0.048	0.0486	0.0483	0.4032	0.287	0.2928	0.966	0.9176	0.8843	0.8418	0.9267	0.7507	0.7414	0.7694	1.1163	1.0922	1.0407	1.0508	1.0429	0.8066	0.8008	0.7329	1.0385	1.0486	1.0806	1.0723	1.0587
	5001	0.1026	0.1203	0.102	0.0532	0.0484	0.0485	0.0504	0.0486	0.2103	0.1631	0.2408	0.5559	0.6608	0.5606	0.3775	0.5115	0.7388	0.7002	0.6786	1.1	1.0389	1.0079	0.9858	1.0256	0.6571	0.7205	0.6835	1.0382	0.9987	0.9903	0.9604	1.011
	50014	0.1257	0.1216	0.1194	0.0512	0.049	0.0496	0.0492	0.05	0.1341	0.1272	0.1356	0.1927	0.2923	0.286	0.088	0.1383	0.3328	0.4511	0.4068	0.9093	0.8006	0.8037	0.7851	0.8578	0.566	0.4561	0.365	0.9105	0.8075	0.6032	0.5704	0.8005
	500180	0.1415	0.1334	0.1334	0.052	0.0497	0.049	0.0501	0.0496	0.1355	0.1364	0.1384	0.0772	0.0968	0.0989	0.0548	0.0585	0.1671	0.2024	0.3611	0.4503	0.3264	0.3471	0.468	0.4766	0.197	0.2064	0.2355	0.5718	0.398	0.2088	0.2225	0.3128
	5002251	0.1394	0.1475	0.1348	0.0507	0.0508	0.0488	0.0488	0.0504	0.1391	0.1392	0.1378	0.0516	0.0581	0.0571	0.0499	0.0515	0.1468	0.141	0.1577	0.1433	0.0995	0.1136	0.1417	0.1606	0.15	0.1503	0.1579	0.2041	0.1644	0.089	0.0786	0.0951
	50027009	0.1429	0.1405	0.1229	0.0515	0.0489	0.0519	0.0496	0.0503	0.141	0.1435	0.1494	0.0513	0.063	0.0514	0.05	0.05	0.135	0.1425	0.1459	0.0762	0.0607	0.0672	0.0751	0.0866	0.1498	0.1564	0.161	0.1083	0.0812	0.061	0.0577	0.0639
2ndary only control (for blank subtraction)		0.1594	0.1484	0.144	0.0515	0.0496	0.0496	0.0492	0.0499	0.1394	0.1352	0.1394	0.0484	0.05	0.0492	0.0483	0.0492	0.1384	0.1406	0.1461	0.0526	0.0506	0.0506	0.0508	0.0509	0.1426	0.1432	0.1579	0.0497	0.0504	0.0506	0.05	0.0503
Background subtracted	Cohort	6mer	6mer	6mer	6mer	6mer	6mer	6mer	6mer	6mer	6mer	6mer	6mer	6mer	6mer	6mer	6mer	6mer	6mer	6mer	6mer	6mer	6mer	6mer	6mer	6mer	6mer	6mer	6mer	6mer	6mer	6mer	6mer
	Individual Mouse	UL	LL	UR	LR	O	386	387	388	UL	LL	UR	LR	O	386	387	388	UL	LL	UR	LR	O	386	387	388	UL	LL	UR	LR	O	386	387	388
	Time point	d0	d0	d0	d0	d0	d0	d0	d0	d14	d14	d14	d14	d14	d14	d14	d14	d28	d28	d28	d28	d28	d28	d28	d28	d42	d42	d42	d42	d42	d42	d42	d42
	Dilution Factor
	50	-0.0798	-0.0236	-0.0653	0.0095	0.0136	0.0019	0.0046	0	0.6197	0.5664	0.5627	0.9994	0.9618	0.9525	0.9766	0.9725	0.7351	0.7094	0.7276	1.0382	1.0193	0.998	1.0121	0.9898	0.7762	0.7333	0.7353	0.9688	0.9757	0.948	0.9721	0.9984
	500	-0.0876	-0.0482	-0.0641	0.002	0.0029	-0.0016	-0.0006	-0.0016	0.2638	0.1518	0.1534	0.9176	0.8676	0.8351	0.7935	0.8775	0.6123	0.6008	0.6233	1.0637	1.0416	0.9901	1	0.992	0.664	0.6576	0.575	0.9888	0.9982	1.03	1.0223	1.0084
	5001	-0.0568	-0.0281	-0.042	0.0017	-0.0012	-0.0011	0.0012	-0.0013	0.0709	0.0279	0.1014	0.5075	0.6108	0.5114	0.3292	0.4623	0.6004	0.5596	0.5325	1.0474	0.9883	0.9573	0.935	0.9747	0.5145	0.5773	0.5256	0.9885	0.9483	0.9397	0.9104	0.9607
	50014	-0.0337	-0.0268	-0.0246	-0.0003	-0.0006	0	0	0.0001	-0.0053	-0.008	-0.0038	0.1443	0.2423	0.2368	0.0397	0.0891	0.1944	0.3105	0.2607	0.8567	0.75	0.7531	0.7343	0.8069	0.4234	0.3129	0.2071	0.8608	0.7571	0.5526	0.5204	0.7502
	500180	-0.0179	-0.015	-0.0106	0.0005	0.0001	-0.0006	0.0009	-0.0003	-0.0039	0.0012	-0.001	0.0288	0.0468	0.0497	0.0065	0.0093	0.0287	0.0618	0.215	0.3977	0.2758	0.2965	0.4172	0.4257	0.0544	0.0632	0.0776	0.5221	0.3476	0.1582	0.1725	0.2625
	5002251	-0.02	-0.0009	-0.0092	-0.0008	0.0012	-0.0008	-0.0004	0.0005	-0.0003	0.004	-0.0016	0.0032	0.0081	0.0079	0.0016	0.0023	0.0084	0.0004	0.0116	0.0907	0.0489	0.063	0.0909	0.1097	0.0074	0.0071	0	0.1544	0.114	0.0384	0.0286	0.0448
	50027009	-0.0165	-0.0079	-0.0211	0	-0.0007	0.0023	0.0004	0.0004	0.0016	0.0083	0.01	0.0029	0.013	0.0022	0.0017	0.0008	-0.0034	0.0019	-0.0002	0.0236	0.0101	0.0166	0.0243	0.0357	0.0072	0.0132	0.0031	0.0586	0.0308	0.0104	0.0077	0.0136
Chose y = 0.1 as intersection point for interpolation of Sigmoid		0.1	0.1	0.1	0.1	0.1	0.1	0.1	0.1	0.1	0.1	0.1	0.1	0.1	0.1	0.1	0.1	0.1	0.1	0.1	0.1	0.1	0.1	0.1	0.1	0.1	0.1	0.1	0.1	0.1	0.1	0.1	0.1
Interpolation (for titers)	Cohort	6mer	6mer	6mer	6mer	6mer	6mer	6mer	6mer	6mer	6mer	6mer	6mer	6mer	6mer	6mer	6mer	6mer	6mer	6mer	6mer	6mer	6mer	6mer	6mer	6mer	6mer	6mer	6mer	6mer	6mer	6mer	6mer
	Individual Mouse	UL	LL	UR	LR	O	386	387	388	UL	LL	UR	LR	O	386	387	388	UL	LL	UR	LR	O	386	387	388	UL	LL	UR	LR	O	386	387	388
	Time point	d0	d0	d0	d0	d0	d0	d0	d0	d14	d14	d14	d14	d14	d14	d14	d14	d28	d28	d28	d28	d28	d28	d28	d28	d42	d42	d42	d42	d42	d42	d42	d42
		50	50	50	50	50	50	50	50	2600.31	868.686	1514.25	74420.9	216042	223861	24201.5	43138.4	105939	349640	1.4355e+06	4.21633e+06	2.05649e+06	2.52103e+06	6.35508e+06	6.27564e+06	724735	353187	264941	1.17495e+07	5.12493e+06	807384	917803	1.84726e+06
Log transform of titers	Cohort	6mer	6mer	6mer	6mer	6mer	6mer	6mer	6mer	6mer	6mer	6mer	6mer	6mer	6mer	6mer	6mer	6mer	6mer	6mer	6mer	6mer	6mer	6mer	6mer	6mer	6mer	6mer	6mer	6mer	6mer	6mer	6mer
	Individual Mouse	UL	LL	UR	LR	O	386	387	388	UL	LL	UR	LR	O	386	387	388	UL	LL	UR	LR	O	386	387	388	UL	LL	UR	LR	O	386	387	388
	Time point	d0	d0	d0	d0	d0	d0	d0	d0	d14	d14	d14	d14	d14	d14	d14	d14	d28	d28	d28	d28	d28	d28	d28	d28	d42	d42	d42	d42	d42	d42	d42	d42
		1.69897	1.69897	1.69897	1.69897	1.69897	1.69897	1.69897	1.69897	3.41503	2.93886	3.1802	4.87169	5.33454	5.34998	4.38384	4.63486	5.02506	5.54362	6.157	6.62493	6.31313	6.40158	6.80312	6.79766	5.86018	5.54801	5.42315	7.07002	6.70969	5.90708	5.96275	6.26653

## Sheet: Figure 3B 7mer
		Individual Mice from each cohort
Time-course data	Cohort	7mer	7mer	7mer	7mer	7mer	7mer	7mer	7mer	7mer	7mer	7mer	7mer	7mer	7mer	7mer	7mer	7mer	7mer	7mer	7mer	7mer	7mer	7mer	7mer	7mer	7mer	7mer	7mer	7mer	7mer	7mer	7mer
	Individual Mouse	UL	LL	UR	LR	O	389	390 = 055	391 = 056	UL	LL	UR	LR	O	389	390 = 055	391 = 056	UL	LL	UR	LR	O	389	390 = 055	391 = 056	UL	LL	UR	LR	O	389	390 = 055	391 = 056
	Time point	d0	d0	d0	d0	d0	d0	d0	d0	d14	d14	d14	d14	d14	d14	d14	d14	d28	d28	d28	d28	d28	d28	d28	d28	d42	d42	d42	d42	d42	d42	d42	d42
	Dilution Factor
	50	0.0888	0.109	0.1135	0.0642	0.0566	0.0514	0.0492	0.0544	0.7932	0.7744	0.7308	0.9462	0.8772	0.9886	0.9518	0.9823	0.7676	0.8455	0.881	1.0527	1.0489	1.0545	1.0069	0.9937	0.8901	0.9087	0.9209	1.0139	1.0036	1.0004	0.9901	1.0203
	500	0.087	0.0972	0.1144	0.0539	0.0497	0.0491	0.0483	0.0489	0.5066	0.5088	0.5072	0.7106	0.6035	0.7063	0.7653	0.7608	0.8556	0.8843	0.8651	1.0619	1.0358	1.0594	1.0332	1.0284	0.886	0.8764	0.9046	1.0478	1.0013	1.0084	1.0421	1.0216
	5001	0.108	0.122	0.1329	0.0522	0.0517	0.0493	0.0487	0.0492	0.1927	0.2093	0.208	0.282	0.1802	0.2862	0.3142	0.2908	0.6772	0.6228	0.5908	1.0141	0.8856	0.9413	0.973	0.9384	0.6288	0.7144	0.6612	0.9856	0.8821	0.99	0.9896	0.9112
	50014	0.1287	0.1739	0.1369	0.0513	0.0506	0.0496	0.0488	0.0487	0.1479	0.1476	0.1431	0.0759	0.0593	0.0745	0.0876	0.0783	0.4873	0.3158	0.2541	0.7391	0.5824	0.5596	0.7342	0.5874	0.2758	0.3251	0.2961	0.6695	0.4614	0.6845	0.6876	0.5613
	500180	0.1307	0.1327	0.1356	0.0503	0.05	0.0489	0.0477	0.0484	0.1391	0.1419	0.1345	0.0512	0.0498	0.0506	0.0524	0.0524	0.2816	0.1783	0.1651	0.3022	0.2149	0.1418	0.2761	0.1683	0.1755	0.1794	0.1824	0.2009	0.1276	0.2163	0.2427	0.1908
	5002251	0.1574	0.1426	0.1603	0.0492	0.0496	0.0487	0.0493	0.0496	0.1457	0.1482	0.1497	0.0499	0.0491	0.0494	0.0488	0.0493	0.2294	0.1595	0.1578	0.1162	0.0884	0.0747	0.1028	0.0759	0.1588	0.1648	0.1654	0.0805	0.0669	0.0897	0.0982	0.0844
	50027009	0.1458	0.1568	0.1443	0.0511	0.0492	0.0493	0.0493	0.0494	0.1464	0.1442	0.1441	0.05	0.0492	0.0499	0.0501	0.05	0.191	0.1586	0.1494	0.068	0.0594	0.0573	0.063	0.0595	0.1567	0.1576	0.1646	0.0624	0.0564	0.0641	0.0634	0.059
2ndary only control (for blank subtraction)		0.139	0.1572	0.1541	0.051	0.0494	0.0498	0.0483	0.0504	0.1532	0.151	0.1408	0.0498	0.05	0.0502	0.0495	0.0512	0.1648	0.1578	0.1513	0.0514	0.0492	0.0507	0.0493	0.0498	0.1609	0.1534	0.1605	0.0501	0.0482	0.0494	0.0493	0.0495
Background subtracted	Cohort	7mer	7mer	7mer	7mer	7mer	7mer	7mer	7mer	7mer	7mer	7mer	7mer	7mer	7mer	7mer	7mer	7mer	7mer	7mer	7mer	7mer	7mer	7mer	7mer	7mer	7mer	7mer	7mer	7mer	7mer	7mer	7mer
	Individual Mouse	UL	LL	UR	LR	O	389	390 = 055	391 = 056	UL	LL	UR	LR	O	389	390 = 055	391 = 056	UL	LL	UR	LR	O	389	390 = 055	391 = 056	UL	LL	UR	LR	O	389	390 = 055	391 = 056
	Time point	d0	d0	d0	d0	d0	d0	d0	d0	d14	d14	d14	d14	d14	d14	d14	d14	d28	d28	d28	d28	d28	d28	d28	d28	d42	d42	d42	d42	d42	d42	d42	d42
	Dilution Factor
	50	-0.0502	-0.0482	-0.0406	0.0132	0.0072	0.0016	0.0009	0.004	0.64	0.6234	0.59	0.8964	0.8272	0.9384	0.9023	0.9311	0.6028	0.6877	0.7297	1.0013	0.9997	1.0038	0.9576	0.9439	0.7292	0.7553	0.7604	0.9638	0.9554	0.951	0.9408	0.9708
	500	-0.052	-0.06	-0.0397	0.0029	0.0003	-0.0007	0	-0.0015	0.3534	0.3578	0.3664	0.6608	0.5535	0.6561	0.7158	0.7096	0.6908	0.7265	0.7138	1.0105	0.9866	1.0087	0.9839	0.9786	0.7251	0.723	0.7441	0.9977	0.9531	0.959	0.9928	0.9721
	5001	-0.031	-0.0352	-0.0212	0.0012	0.0023	-0.0005	0.0004	-0.0012	0.0395	0.0583	0.0672	0.2322	0.1302	0.236	0.2647	0.2396	0.5124	0.465	0.4395	0.9627	0.8364	0.8906	0.9237	0.8886	0.4679	0.561	0.5007	0.9355	0.8339	0.9406	0.9403	0.8617
	50014	-0.0103	0.0167	-0.0172	0.0003	0.0012	-0.0002	0.0005	-0.0017	-0.0053	-0.0034	0.0023	0.0261	0.0093	0.0243	0.0381	0.0271	0.3225	0.158	0.1028	0.6877	0.5332	0.5089	0.6849	0.5376	0.1149	0.1717	0.1356	0.6194	0.4132	0.6351	0.6383	0.5118
	500180	-0.0083	-0.0245	-0.0185	-0.0007	0.0006	-0.0009	-0.0006	-0.002	-0.0141	-0.0091	-0.0063	0.0014	-0.0002	0.0004	0.0029	0.0012	0.1168	0.0205	0.0138	0.2508	0.1657	0.0911	0.2268	0.1185	0.0146	0.026	0.0219	0.1508	0.0794	0.1669	0.1934	0.1413
	5002251	0.0184	-0.0146	0.0062	-0.0018	0.0002	-0.0011	0.001	-0.0008	-0.0075	-0.0028	0.0089	0.0001	-0.0009	-0.0008	-0.0007	-0.0019	0.0646	0.0017	0.0065	0.0648	0.0392	0.024	0.0535	0.0261	-0.0021	0.0114	0.0049	0.0304	0.0187	0.0403	0.0489	0.0349
	50027009	0.0068	-0.0004	-0.0098	0.0001	-0.0002	-0.0005	0.001	-0.001	-0.0068	-0.0068	0.0033	0.0002	-0.0008	-0.0003	0.0006	-0.0012	0.0262	0.0008	-0.0019	0.0166	0.0102	0.0066	0.0137	0.0097	-0.0042	0.0042	0.0041	0.0123	0.0082	0.0147	0.0141	0.0095
Chose y = 0.1 as intersection point for interpolation of Sigmoid		0.1	0.1	0.1	0.1	0.1	0.1	0.1	0.1	0.1	0.1	0.1	0.1	0.1	0.1	0.1	0.1	0.1	0.1	0.1	0.1	0.1	0.1	0.1	0.1	0.1	0.1	0.1	0.1	0.1	0.1	0.1	0.1
Interpolation (for titers)	Cohort	7mer	7mer	7mer	7mer	7mer	7mer	7mer	7mer	7mer	7mer	7mer	7mer	7mer	7mer	7mer	7mer	7mer	7mer	7mer	7mer	7mer	7mer	7mer	7mer	7mer	7mer	7mer	7mer	7mer	7mer	7mer	7mer
	Individual Mouse	UL	LL	UR	LR	O	389	390 = 055	391 = 056	UL	LL	UR	LR	O	389	390 = 055	391 = 056	UL	LL	UR	LR	O	389	390 = 055	391 = 056	UL	LL	UR	LR	O	389	390 = 055	391 = 056
	Time point	d0	d0	d0	d0	d0	d0	d0	d0	d14	d14	d14	d14	d14	d14	d14	d14	d28	d28	d28	d28	d28	d28	d28	d28	d42	d42	d42	d42	d42	d42	d42	d42
		50	50	50	50	50	50	50	50	2297.16	2880.63	3211.43	15272.9	6691.18	16232.2	17943.3	15010.4	749100	82010.1	47940.5	2.08894e+06	1.24304e+06	524631	1.63264e+06	615015	55473.6	99712.4	71001	818433	381210	933680	1.21432e+06	834910
Log transform of titers	Cohort	7mer	7mer	7mer	7mer	7mer	7mer	7mer	7mer	7mer	7mer	7mer	7mer	7mer	7mer	7mer	7mer	7mer	7mer	7mer	7mer	7mer	7mer	7mer	7mer	7mer	7mer	7mer	7mer	7mer	7mer	7mer	7mer
	Individual Mouse	UL	LL	UR	LR	O	389	390 = 055	391 = 056	UL	LL	UR	LR	O	389	390 = 055	391 = 056	UL	LL	UR	LR	O	389	390 = 055	391 = 056	UL	LL	UR	LR	O	389	390 = 055	391 = 056
	Time point	d0	d0	d0	d0	d0	d0	d0	d0	d14	d14	d14	d14	d14	d14	d14	d14	d28	d28	d28	d28	d28	d28	d28	d28	d42	d42	d42	d42	d42	d42	d42	d42
		1.69897	1.69897	1.69897	1.69897	1.69897	1.69897	1.69897	1.69897	3.36119	3.45949	3.5067	4.18392	3.8255	4.21038	4.2539	4.17639	5.87454	4.91387	4.6807	6.31993	6.09449	5.71985	6.21289	5.78889	4.74409	4.99875	4.85126	5.91298	5.58116	5.9702	6.08433	5.92164

## Sheet: Figure 3B 8mer
		Individual Mice from each cohort
Time-course data	Cohort	8mer	8mer	8mer	8mer	8mer	8mer	8mer	8mer	8mer	8mer	8mer	8mer	8mer	8mer	8mer	8mer	8mer	8mer	8mer	8mer	8mer	8mer	8mer	8mer	8mer	8mer	8mer	8mer	8mer	8mer	8mer	8mer
	Individual Mouse	UL	LL	UR	LR	O	392	393	394	UL	LL	UR	LR	O	392	393	394	UL	LL	UR	LR	O	392	393	394	UL	LL	UR	LR	O	392	393	394
	Time point	d0	d0	d0	d0	d0	d0	d0	d0	d14	d14	d14	d14	d14	d14	d14	d14	d28	d28	d28	d28	d28	d28	d28	d28	d42	d42	d42	d42	d42	d42	d42	d42
	Dilution Factor
	50	0.1064	0.1016	0.0958	0.0532	0.0518	0.0567	0.0526	0.0507	0.6627	0.7459	0.719	0.9467	0.9694	0.9905	0.9265	0.9076	0.8953	0.9367	0.9403	1.0594	1.0093	1.0211	0.9868	0.9667	0.9605	0.9561	0.9563	0.977	0.9516	0.9774	0.9699	0.9657
	500	0.1007	0.0935	0.0847	0.0493	0.0492	0.0491	0.051	0.0493	0.3204	0.451	0.4238	0.7044	0.8736	0.8712	0.7419	0.7672	0.8411	0.8808	0.8823	1.0403	1.0314	1.0304	1.0166	0.9897	0.8385	0.9296	0.8929	1.0171	1.0091	1.0218	1.0104	1.023
	5001	0.1199	0.0977	0.1001	0.0502	0.0486	0.0528	0.0506	0.0532	0.1472	0.1731	0.1709	0.3038	0.5206	0.4984	0.2907	0.4324	0.565	0.5476	0.6828	0.8977	0.9783	0.978	0.9255	0.9525	0.5664	0.7411	0.6165	0.9837	0.9921	0.992	0.9581	0.9753
	50014	0.115	0.1352	0.1261	0.05	0.0503	0.05	0.0496	0.0498	0.1349	0.1447	0.1323	0.0843	0.1822	0.1363	0.0734	0.1541	0.2078	0.2267	0.2719	0.3722	0.6919	0.758	0.5617	0.7687	0.2541	0.3808	0.3004	0.7107	0.8046	0.6555	0.5993	0.7238
	500180	0.1161	0.1296	0.1415	0.0496	0.0505	0.0491	0.0492	0.049	0.1362	0.1279	0.1274	0.0535	0.0658	0.0625	0.0519	0.0715	0.1362	0.1403	0.1586	0.1061	0.2114	0.2596	0.1587	0.3043	0.1644	0.2109	0.1763	0.2468	0.3577	0.2545	0.2088	0.3324
	5002251	0.1262	0.12	0.1318	0.0501	0.05	0.0496	0.0498	0.0498	0.1422	0.1436	0.1269	0.0494	0.0516	0.0524	0.0496	0.0543	0.1346	0.1412	0.1433	0.0636	0.0942	0.1116	0.0752	0.1093	0.1456	0.1542	0.1675	0.0963	0.1279	0.0946	0.0957	0.1221
	50027009	0.126	0.1244	0.1365	0.0493	0.0492	0.0768	0.0524	0.0502	0.1439	0.1467	0.1327	0.0502	0.0511	0.0513	0.0504	0.0514	0.1364	0.1412	0.1488	0.0584	0.0652	0.0674	0.0615	0.0675	0.1624	0.1555	0.1599	0.0746	0.0789	0.0668	0.0716	0.069
2ndary only control (for blank subtraction)		0.1295	0.1394	0.1372	0.0509	0.0491	0.0497	0.0496	0.0499	0.1344	0.1283	0.1209	0.0495	0.0498	0.051	0.0504	0.0499	0.122	0.1308	0.1458	0.0504	0.049	0.0493	0.0495	0.05	0.1534	0.1592	0.16	0.0498	0.0493	0.0508	0.0502	0.0502
Background subtracted	Cohort	8mer	8mer	8mer	8mer	8mer	8mer	8mer	8mer	8mer	8mer	8mer	8mer	8mer	8mer	8mer	8mer	8mer	8mer	8mer	8mer	8mer	8mer	8mer	8mer	8mer	8mer	8mer	8mer	8mer	8mer	8mer	8mer
	Individual Mouse	UL	LL	UR	LR	O	392	393	394	UL	LL	UR	LR	O	392	393	394	UL	LL	UR	LR	O	392	393	394	UL	LL	UR	LR	O	392	393	394
	Time point	d0	d0	d0	d0	d0	d0	d0	d0	d14	d14	d14	d14	d14	d14	d14	d14	d28	d28	d28	d28	d28	d28	d28	d28	d42	d42	d42	d42	d42	d42	d42	d42
	Dilution Factor
	50	-0.0231	-0.0378	-0.0414	0.0023	0.0027	0.007	0.003	0.0008	0.5283	0.6176	0.5981	0.8972	0.9196	0.9395	0.8761	0.8577	0.7733	0.8059	0.7945	1.009	0.9603	0.9718	0.9373	0.9167	0.8071	0.7969	0.7963	0.9272	0.9023	0.9266	0.9197	0.9155
	500	-0.0288	-0.0459	-0.0525	-0.0016	0.0001	-0.0006	0.0014	-0.0006	0.186	0.3227	0.3029	0.6549	0.8238	0.8202	0.6915	0.7173	0.7191	0.75	0.7365	0.9899	0.9824	0.9811	0.9671	0.9397	0.6851	0.7704	0.7329	0.9673	0.9598	0.971	0.9602	0.9728
	5001	-0.0096	-0.0417	-0.0371	-0.0007	-0.0005	0.0031	0.001	0.0033	0.0128	0.0448	0.05	0.2543	0.4708	0.4474	0.2403	0.3825	0.443	0.4168	0.537	0.8473	0.9293	0.9287	0.876	0.9025	0.413	0.5819	0.4565	0.9339	0.9428	0.9412	0.9079	0.9251
	50014	-0.0145	-0.0042	-0.0111	-0.0009	0.0012	0.0003	0	-0.0001	0.0005	0.0164	0.0114	0.0348	0.1324	0.0853	0.023	0.1042	0.0858	0.0959	0.1261	0.3218	0.6429	0.7087	0.5122	0.7187	0.1007	0.2216	0.1404	0.6609	0.7553	0.6047	0.5491	0.6736
	500180	-0.0134	-0.0098	0.0043	-0.0013	0.0014	-0.0006	-0.0004	-0.0009	0.0018	-0.0004	0.0065	0.004	0.016	0.0115	0.0015	0.0216	0.0142	0.0095	0.0128	0.0557	0.1624	0.2103	0.1092	0.2543	0.011	0.0517	0.0163	0.197	0.3084	0.2037	0.1586	0.2822
	5002251	-0.0033	-0.0194	-0.0054	-0.0008	0.0009	-0.0001	0.0002	-0.0001	0.0078	0.0153	0.006	-0.0001	0.0018	0.0014	-0.0008	0.0044	0.0126	0.0104	-0.0025	0.0132	0.0452	0.0623	0.0257	0.0593	-0.0078	-0.005	0.0075	0.0465	0.0786	0.0438	0.0455	0.0719
	50027009	-0.0035	-0.015	-0.0007	-0.0016	0.0001	0.0271	0.0028	0.0003	0.0095	0.0184	0.0118	0.0007	0.0013	0.0003	0	0.0015	0.0144	0.0104	0.003	0.008	0.0162	0.0181	0.012	0.0175	0.009	-0.0037	-0.0001	0.0248	0.0296	0.016	0.0214	0.0188
Chose y = 0.1 as intersection point for interpolation of Sigmoid		0.1	0.1	0.1	0.1	0.1	0.1	0.1	0.1	0.1	0.1	0.1	0.1	0.1	0.1	0.1	0.1	0.1	0.1	0.1	0.1	0.1	0.1	0.1	0.1	0.1	0.1	0.1	0.1	0.1	0.1	0.1	0.1
Interpolation (for titers)	Cohort	8mer	8mer	8mer	8mer	8mer	8mer	8mer	8mer	8mer	8mer	8mer	8mer	8mer	8mer	8mer	8mer	8mer	8mer	8mer	8mer	8mer	8mer	8mer	8mer	8mer	8mer	8mer	8mer	8mer	8mer	8mer	8mer
	Individual Mouse	UL	LL	UR	LR	O	392	393	394	UL	LL	UR	LR	O	392	393	394	UL	LL	UR	LR	O	392	393	394	UL	LL	UR	LR	O	392	393	394
	Time point	d0	d0	d0	d0	d0	d0	d0	d0	d14	d14	d14	d14	d14	d14	d14	d14	d28	d28	d28	d28	d28	d28	d28	d28	d42	d42	d42	d42	d42	d42	d42	d42
		50	50	50	50	50	50	50	50	868.427	2099.29	2232.81	19190.2	69563.6	46228	14621.6	54743.5	43062.3	43081.3	67200.4	217383	955705	1.47117e+06	554793	1.87487e+06	57032.4	165490	76916	1.24543e+06	2.80825e+06	1.26211e+06	868607	2.64857e+06
Log transform of titers	Cohort	8mer	8mer	8mer	8mer	8mer	8mer	8mer	8mer	8mer	8mer	8mer	8mer	8mer	8mer	8mer	8mer	8mer	8mer	8mer	8mer	8mer	8mer	8mer	8mer	8mer	8mer	8mer	8mer	8mer	8mer	8mer	8mer
	Individual Mouse	UL	LL	UR	LR	O	392	393	394	UL	LL	UR	LR	O	392	393	394	UL	LL	UR	LR	O	392	393	394	UL	LL	UR	LR	O	392	393	394
	Time point	d0	d0	d0	d0	d0	d0	d0	d0	d14	d14	d14	d14	d14	d14	d14	d14	d28	d28	d28	d28	d28	d28	d28	d28	d42	d42	d42	d42	d42	d42	d42	d42
		1.69897	1.69897	1.69897	1.69897	1.69897	1.69897	1.69897	1.69897	2.93873	3.32207	3.34885	4.28308	4.84238	4.6649	4.165	4.73833	4.6341	4.63429	4.82737	5.33723	5.98032	6.16766	5.74413	6.27297	4.75612	5.21877	4.88602	6.09532	6.44844	6.1011	5.93882	6.42301

## Sheet: Figure 3C d42 titers
		Individual Mice from each cohort
Time-course data	Cohort	3mer	3mer	3mer	3mer	3mer	3mer	3mer	3mer	4mer	4mer	4mer	4mer	4mer	4mer	4mer	4mer	5mer	5mer	5mer	5mer	5mer	5mer	5mer	5mer	6mer	6mer	6mer	6mer	6mer	6mer	6mer	6mer	7mer	7mer	7mer	7mer	7mer	7mer	7mer	7mer	8mer	8mer	8mer	8mer	8mer	8mer	8mer	8mer
	Individual Mouse	UL	LL	UR	LR	O	377 = 054	378	379	UL	LL	UR	LR	O	380	381	382	UL	LL	UR	LR	O	383	384 = 053	385 = 052	UL	LL	UR	LR	O	386	387	388	UL	LL	UR	LR	O	389	390 = 055	391 = 056	UL	LL	UR	LR	O	392	393	394
	Time point	d42	d42	d42	d42	d42	d42	d42	d42	d42	d42	d42	d42	d42	d42	d42	d42	d42	d42	d42	d42	d42	d42	d42	d42	d42	d42	d42	d42	d42	d42	d42	d42	d42	d42	d42	d42	d42	d42	d42	d42	d42	d42	d42	d42	d42	d42	d42	d42
	Dilution Factor
	50	0.8336	0.74	0.824	0.7744	0.7246	0.7355	0.7232	0.8073	0.8841	0.8953	0.8744	0.7266	0.7208	0.6963	0.706	0.699	0.8746	0.8736	0.901	0.7359	0.7151	0.7336	0.7186	0.7146	0.9188	0.8765	0.8932	1.0185	1.0261	0.9986	1.0221	1.0487	0.8901	0.9087	0.9209	1.0139	1.0036	1.0004	0.9901	1.0203	0.9605	0.9561	0.9563	0.977	0.9516	0.9774	0.9699	0.9657
	500	0.7809	0.6042	0.7208	0.7554	0.728	0.7448	0.6826	0.7132	0.8509	0.9311	0.8814	0.7223	0.7224	0.7286	0.7328	0.7346	0.8362	0.8802	0.9092	0.7877	0.7802	0.7796	0.7806	0.7753	0.8066	0.8008	0.7329	1.0385	1.0486	1.0806	1.0723	1.0587	0.886	0.8764	0.9046	1.0478	1.0013	1.0084	1.0421	1.0216	0.8385	0.9296	0.8929	1.0171	1.0091	1.0218	1.0104	1.023
	5001	0.6089	0.3295	0.4656	0.6771	0.6287	0.666	0.531	0.5449	0.8523	0.8091	0.8951	0.7227	0.7151	0.6688	0.7236	0.6896	0.8403	0.8389	0.8091	0.7595	0.7736	0.7636	0.6738	0.7076	0.6571	0.7205	0.6835	1.0382	0.9987	0.9903	0.9604	1.011	0.6288	0.7144	0.6612	0.9856	0.8821	0.99	0.9896	0.9112	0.5664	0.7411	0.6165	0.9837	0.9921	0.992	0.9581	0.9753
	50014	0.2554	0.1976	0.2218	0.4374	0.3768	0.3944	0.2462	0.3833	0.7053	0.6078	0.6384	0.5737	0.6311	0.4679	0.5432	0.6098	0.6446	0.565	0.4345	0.636	0.5873	0.6397	0.3325	0.3802	0.566	0.4561	0.365	0.9105	0.8075	0.6032	0.5704	0.8005	0.2758	0.3251	0.2961	0.6695	0.4614	0.6845	0.6876	0.5613	0.2541	0.3808	0.3004	0.7107	0.8046	0.6555	0.5993	0.7238
	500180	0.1642	0.1517	0.1643	0.1539	0.1299	0.1526	0.0886	0.1324	0.4969	0.3052	0.38	0.2865	0.4154	0.1576	0.2067	0.3888	0.3736	0.3541	0.2358	0.3511	0.2804	0.3519	0.12	0.1339	0.197	0.2064	0.2355	0.5718	0.398	0.2088	0.2225	0.3128	0.1755	0.1794	0.1824	0.2009	0.1276	0.2163	0.2427	0.1908	0.1644	0.2109	0.1763	0.2468	0.3577	0.2545	0.2088	0.3324
	5002251	0.1493	0.143	0.1394	0.0709	0.0691	0.0737	0.0518	0.052	0.3039	0.1853	0.2088	0.1152	0.2011	0.082	0.0895	0.2449	0.2038	0.1817	0.574	0.144	0.115	0.1479	0.0674	0.0667	0.15	0.1503	0.1579	0.2041	0.1644	0.089	0.0786	0.0951	0.1588	0.1648	0.1654	0.0805	0.0669	0.0897	0.0982	0.0844	0.1456	0.1542	0.1675	0.0963	0.1279	0.0946	0.0957	0.1221
	50027009	0.135	0.1459	0.1405	0.0574	0.0559	0.0557	0.0449	0.0393	0.3469	0.1637	0.1633	0.0719	0.0996	0.0624	0.0645	0.0968	0.1528	0.1433	0.1473	0.0821	0.0748	0.0815	0.0586	0.0547	0.1498	0.1564	0.161	0.1083	0.0812	0.061	0.0577	0.0639	0.1567	0.1576	0.1646	0.0624	0.0564	0.0641	0.0634	0.059	0.1624	0.1555	0.1599	0.0746	0.0789	0.0668	0.0716	0.069
2ndary only control (for blank subtraction)		0.1399	0.1358	0.1425	0.047	0.0476	0.0464	0.0466	0.0407	0.151	0.1437	0.1437	0.0496	0.0511	0.0492	0.0525	0.0544	0.1461	0.1404	0.1483	0.0463	0.0458	0.0459	0.0455	0.0453	0.1426	0.1432	0.1579	0.0497	0.0504	0.0506	0.05	0.0503	0.1609	0.1534	0.1605	0.0501	0.0482	0.0494	0.0493	0.0495	0.1534	0.1592	0.16	0.0498	0.0493	0.0508	0.0502	0.0502
Background subtracted	Cohort	3mer	3mer	3mer	3mer	3mer	3mer	3mer	3mer	4mer	4mer	4mer	4mer	4mer	4mer	4mer	4mer	5mer	5mer	5mer	5mer	5mer	5mer	5mer	5mer	6mer	6mer	6mer	6mer	6mer	6mer	6mer	6mer	7mer	7mer	7mer	7mer	7mer	7mer	7mer	7mer	8mer	8mer	8mer	8mer	8mer	8mer	8mer	8mer
	Individual Mouse	UL	LL	UR	LR	O	377 = 054	378	379	UL	LL	UR	LR	O	380	381	382	UL	LL	UR	LR	O	383	384 = 053	385 = 052	UL	LL	UR	LR	O	386	387	388	UL	LL	UR	LR	O	389	390 = 055	391 = 056	UL	LL	UR	LR	O	392	393	394
	Time point	d42	d42	d42	d42	d42	d42	d42	d42	d42	d42	d42	d42	d42	d42	d42	d42	d42	d42	d42	d42	d42	d42	d42	d42	d42	d42	d42	d42	d42	d42	d42	d42	d42	d42	d42	d42	d42	d42	d42	d42	d42	d42	d42	d42	d42	d42	d42	d42
	Dilution Factor
	50	0.6937	0.6042	0.6815	0.7274	0.677	0.6891	0.6766	0.7666	0.7331	0.7516	0.7307	0.677	0.6697	0.6471	0.6535	0.6446	0.7285	0.7332	0.7527	0.6896	0.6693	0.6877	0.6731	0.6693	0.7762	0.7333	0.7353	0.9688	0.9757	0.948	0.9721	0.9984	0.7292	0.7553	0.7604	0.9638	0.9554	0.951	0.9408	0.9708	0.8071	0.7969	0.7963	0.9272	0.9023	0.9266	0.9197	0.9155
	500	0.641	0.4684	0.5783	0.7084	0.6804	0.6984	0.636	0.6725	0.6999	0.7874	0.7377	0.6727	0.6713	0.6794	0.6803	0.6802	0.6901	0.7398	0.7609	0.7414	0.7344	0.7337	0.7351	0.73	0.664	0.6576	0.575	0.9888	0.9982	1.03	1.0223	1.0084	0.7251	0.723	0.7441	0.9977	0.9531	0.959	0.9928	0.9721	0.6851	0.7704	0.7329	0.9673	0.9598	0.971	0.9602	0.9728
	5001	0.469	0.1937	0.3231	0.6301	0.5811	0.6196	0.4844	0.5042	0.7013	0.6654	0.7514	0.6731	0.664	0.6196	0.6711	0.6352	0.6942	0.6985	0.6608	0.7132	0.7278	0.7177	0.6283	0.6623	0.5145	0.5773	0.5256	0.9885	0.9483	0.9397	0.9104	0.9607	0.4679	0.561	0.5007	0.9355	0.8339	0.9406	0.9403	0.8617	0.413	0.5819	0.4565	0.9339	0.9428	0.9412	0.9079	0.9251
	50014	0.1155	0.0618	0.0793	0.3904	0.3292	0.348	0.1996	0.3426	0.5543	0.4641	0.4947	0.5241	0.58	0.4187	0.4907	0.5554	0.4985	0.4246	0.2862	0.5897	0.5415	0.5938	0.287	0.3349	0.4234	0.3129	0.2071	0.8608	0.7571	0.5526	0.5204	0.7502	0.1149	0.1717	0.1356	0.6194	0.4132	0.6351	0.6383	0.5118	0.1007	0.2216	0.1404	0.6609	0.7553	0.6047	0.5491	0.6736
	500180	0.0243	0.0159	0.0218	0.1069	0.0823	0.1062	0.042	0.0917	0.3459	0.1615	0.2363	0.2369	0.3643	0.1084	0.1542	0.3344	0.2275	0.2137	0.0875	0.3048	0.2346	0.306	0.0745	0.0886	0.0544	0.0632	0.0776	0.5221	0.3476	0.1582	0.1725	0.2625	0.0146	0.026	0.0219	0.1508	0.0794	0.1669	0.1934	0.1413	0.011	0.0517	0.0163	0.197	0.3084	0.2037	0.1586	0.2822
	5002251	0.0094	0.0072	-0.0031	0.0239	0.0215	0.0273	0.0052	0.0113	0.1529	0.0416	0.0651	0.0656	0.15	0.0328	0.037	0.1905	0.0577	0.0413	0.4257	0.0977	0.0692	0.102	0.0219	0.0214	0.0074	0.0071	0	0.1544	0.114	0.0384	0.0286	0.0448	-0.0021	0.0114	0.0049	0.0304	0.0187	0.0403	0.0489	0.0349	-0.0078	-0.005	0.0075	0.0465	0.0786	0.0438	0.0455	0.0719
	50027009	-0.0049	0.0101	-0.002	0.0104	0.0083	0.0093	-0.0017	-0.0014	0.1959	0.02	0.0196	0.0223	0.0485	0.0132	0.012	0.0424	0.0067	0.0029	-0.001	0.0358	0.029	0.0356	0.0131	0.0094	0.0072	0.0132	0.0031	0.0586	0.0308	0.0104	0.0077	0.0136	-0.0042	0.0042	0.0041	0.0123	0.0082	0.0147	0.0141	0.0095	0.009	-0.0037	-0.0001	0.0248	0.0296	0.016	0.0214	0.0188
Chose y = 0.1 as intersection point for interpolation of Sigmoid		0.1	0.1	0.1	0.1	0.1	0.1	0.1	0.1	0.1	0.1	0.1	0.1	0.1	0.1	0.1	0.1	0.1	0.1	0.1	0.1	0.1	0.1	0.1	0.1	0.1	0.1	0.1	0.1	0.1	0.1	0.1	0.1	0.1	0.1	0.1	0.1	0.1	0.1	0.1	0.1	0.1	0.1	0.1	0.1	0.1	0.1	0.1	0.1
Interpolation (for titers)	Cohort	3mer	3mer	3mer	3mer	3mer	3mer	3mer	3mer	4mer	4mer	4mer	4mer	4mer	4mer	4mer	4mer	5mer	5mer	5mer	5mer	5mer	5mer	5mer	5mer	6mer	6mer	6mer	6mer	6mer	6mer	6mer	6mer	7mer	7mer	7mer	7mer	7mer	7mer	7mer	7mer	8mer	8mer	8mer	8mer	8mer	8mer	8mer	8mer
	Individual Mouse	UL	LL	UR	LR	O	377 = 054	378	379	UL	LL	UR	LR	O	380	381	382	UL	LL	UR	LR	O	383	384 = 053	385 = 052	UL	LL	UR	LR	O	386	387	388	UL	LL	UR	LR	O	389	390 = 055	391 = 056	UL	LL	UR	LR	O	392	393	394
	Time point	d42	d42	d42	d42	d42	d42	d42	d42	d42	d42	d42	d42	d42	d42	d42	d42	d42	d42	d42	d42	d42	d42	d42	d42	d42	d42	d42	d42	d42	d42	d42	d42	d42	d42	d42	d42	d42	d42	d42	d42	d42	d42	d42	d42	d42	d42	d42	d42
		63374.6	16949.7	40203.2	597424	400528	485944	154468	713588		1.20595e+06	2.15093e+06	2.21028e+06	1.06841e+07	572201	877270	1.49019e+07	2.04139e+06	1.57967e+06		4.26247e+06	2.0884e+06	4.33301e+06	229706	291069	724735	353187	264941	1.17495e+07	5.12493e+06	807384	917803	1.84726e+06	55473.6	99712.4	71001	818433	381210	933680	1.21432e+06	834910	57032.4	165490	76916	1.24543e+06	2.80825e+06	1.26211e+06	868607	2.64857e+06
Log transform of titers	Cohort	3mer	3mer	3mer	3mer	3mer	3mer	3mer	3mer	4mer	4mer	4mer	4mer	4mer	4mer	4mer	4mer	5mer	5mer	5mer	5mer	5mer	5mer	5mer	5mer	6mer	6mer	6mer	6mer	6mer	6mer	6mer	6mer	7mer	7mer	7mer	7mer	7mer	7mer	7mer	7mer	8mer	8mer	8mer	8mer	8mer	8mer	8mer	8mer
	Individual Mouse	UL	LL	UR	LR	O	377 = 054	378	379	UL	LL	UR	LR	O	380	381	382	UL	LL	UR	LR	O	383	384 = 053	385 = 052	UL	LL	UR	LR	O	386	387	388	UL	LL	UR	LR	O	389	390 = 055	391 = 056	UL	LL	UR	LR	O	392	393	394
	Time point	d42	d42	d42	d42	d42	d42	d42	d42	d42	d42	d42	d42	d42	d42	d42	d42	d42	d42	d42	d42	d42	d42	d42	d42	d42	d42	d42	d42	d42	d42	d42	d42	d42	d42	d42	d42	d42	d42	d42	d42	d42	d42	d42	d42	d42	d42	d42	d42
		4.80191	4.22916	4.60426	5.77628	5.60263	5.68659	5.18884	5.85345		6.08133	6.33263	6.34445	7.02874	5.75755	5.94313	7.17324	6.30993	6.19857		6.62966	6.31981	6.63679	5.36117	5.464	5.86018	5.54801	5.42315	7.07002	6.70969	5.90708	5.96275	6.26653	4.74409	4.99875	4.85126	5.91298	5.58116	5.9702	6.08433	5.92164	4.75612	5.21877	4.88602	6.09532	6.44844	6.1011	5.93882	6.42301

## Sheet: Figure 3D H1 titers
		Individual Mice from each cohort (
H1 titers (all) (d42)	Cohort	3mer	3mer	3mer	3mer	3mer	3mer	3mer	3mer	4mer	4mer	4mer	4mer	4mer	4mer	4mer	4mer	5mer	5mer	5mer	5mer	5mer	5mer	5mer	5mer	6mer	6mer	6mer	6mer	6mer	6mer	6mer	6mer	7mer	7mer	7mer	7mer	7mer	7mer	7mer	7mer	8mer	8mer	8mer	8mer	8mer	8mer	8mer	8mer
	Individual Mouse	UL	LL	UR	LR	O	377 = 054	378	379	UL	LL	UR	LR	O	380	381	382	UL	LL	UR	LR	O	383	384 = 053	385 = 052	UL	LL	UR	LR	O	386	387	388	UL	LL	UR	LR	O	389	390 = 055	391 = 056	UL	LL	UR	LR	O	392	393	394
	Dilution Factor
	50	0.7852	0.7692	0.8556	0.8702	0.9259	0.9888	0.9668	0.9422	0.8829	0.7689	0.8536	0.8938	0.894	0.9461	0.9919	1.0271	0.8303	0.781	0.8458	0.8245	0.8309	1.1255	1.0642	1.053	0.8099	0.7526	0.7966	0.7986	0.829	1.0465	0.9877	0.9906	0.2079	0.4368	0.5738	0.7914	0.758	0.9478	0.9841	0.9628	0.7897	0.8219	0.8546	0.889	0.8846	0.8702	0.7952	0.938
	500	0.4801	0.5726	0.7399	0.7305	0.7592	0.8073	0.5109	0.6183	0.6503	0.5317	0.5561	0.6695	0.8082	0.7051	0.7495	0.8934	0.7324	0.5886	0.7676	0.7026	0.791	0.7052	0.9303	0.87	0.677	0.4444	0.5508	0.6331	0.6062	0.8666	0.8122	0.7364	0.2313	0.4774	0.1848	0.5132	0.4536	0.6063	0.735	0.6657	0.5215	0.3211	0.5332	0.721	0.6869	0.4085	0.3739	0.4598
	5001	0.1932	0.2783	0.5439	0.4414	0.4577	0.3334	0.1404	0.1946	0.3242	0.2387	0.2421	0.3357	0.5698	0.2438	0.2837	0.4734	0.3976	0.2321	0.4474	0.3169	0.4491	0.2546	0.533	0.383	0.32	0.1527	0.1904	0.2974	0.2374	0.3637	0.2981	0.2235	0.0995	0.1753	0.0834	0.1643	0.1554	0.1653	0.2409	0.1925	0.1808	0.1759	0.1959	0.3472	0.2991	0.1088	0.1102	0.1232
	50014	0.1083	0.1376	0.2951	0.2226	0.2153	0.1145	0.0728	0.0764	0.1539	0.1229	0.1448	0.1414	0.3192	0.0868	0.0938	0.1336	0.1674	0.1081	0.214	0.1299	0.1984	0.0846	0.1512	0.107	0.1571	0.0871	0.0982	0.14	0.1086	0.1016	0.1084	0.0826	0.0718	0.0911	0.0674	0.0912	0.0784	0.0725	0.0833	0.0751	0.0836	0.0983	0.0942	0.1389	0.1458	0.0696	0.066	0.066
	500180	0.0767	0.0909	0.1592	0.1311	0.1296	0.0651	0.0598	0.0629	0.106	0.0928	0.0836	0.0912	0.196	0.0637	0.0646	0.0698	0.0985	0.0757	0.1094	0.085	0.1181	0.0646	0.0716	0.0659	0.0859	0.0723	0.072	0.094	0.0805	0.0654	0.0618	0.0612	0.0635	0.0697	0.0626	0.0683	0.0648	0.06	0.0619	0.0632	0.0688	0.0721	0.072	0.0813	0.0998	0.0606	0.0688	0.0609
	5002251	0.0746	0.092	0.136	0.1043	0.1065	0.0801	0.0588	0.0611	0.0841	0.0783	0.0764	0.0838	0.1135	0.0593	0.0632	0.0606	0.0806	0.0842	0.0821	0.0694	0.0892	0.0604	0.0615	0.0636	0.0732	0.0657	0.0628	0.0732	0.0691	0.061	0.0595	0.0588	0.0623	0.0652	0.0645	0.0642	0.0597	0.0636	0.0597	0.0599	0.0614	0.0607	0.0708	0.07	0.0757	0.0593	0.0597	0.059
	50027009	0.083	0.0754	0.0946	0.09	0.1176	0.0605	0.0603	0.0608	0.075	0.0686	0.0755	0.0705	0.0983	0.0607	0.0602	0.0612	0.0773	0.065	0.0747	0.0688	0.0792	0.0617	0.0614	0.0628	0.0659	0.0641	0.0662	0.0707	0.0684	0.0602	0.0598	0.061	0.066	0.0611	0.0646	0.0658	0.0616	0.0606	0.0599	0.0623	0.0598	0.0622	0.0634	0.0638	0.0674	0.066	0.059	0.062
2ndary only control (for blank subtraction)		0.0654	0.07	0.0664	0.0638	0.0724	0.0682	0.0614	0.0612	0.0652	0.0665	0.0792	0.0633	0.0751	0.0652	0.0615	0.061	0.0642	0.0626	0.0638	0.0616	0.0646	0.0617	0.0624	0.073	0.0614	0.0631	0.0633	0.0627	0.0658	0.061	0.0615	0.0601	0.064	0.0609	0.0603	0.0611	0.0611	0.0645	0.0668	0.0597	0.0585	0.0607	0.0621	0.0936	0.0639	0.0589	0.0604	0.061
Background subtracted	Cohort	3mer	3mer	3mer	3mer	3mer	3mer	3mer	3mer	4mer	4mer	4mer	4mer	4mer	4mer	4mer	4mer	5mer	5mer	5mer	5mer	5mer	5mer	5mer	5mer	6mer	6mer	6mer	6mer	6mer	6mer	6mer	6mer	7mer	7mer	7mer	7mer	7mer	7mer	7mer	7mer	8mer	8mer	8mer	8mer	8mer	8mer	8mer	8mer
	Individual Mouse	UL	LL	UR	LR	O	377 = 054	378	379	UL	LL	UR	LR	O	380	381	382	UL	LL	UR	LR	O	383	384 = 053	385 = 052	UL	LL	UR	LR	O	386	387	388	UL	LL	UR	LR	O	389	390 = 055	391 = 056	UL	LL	UR	LR	O	392	393	394
	Dilution Factor
	50	0.7198	0.6992	0.7892	0.8064	0.8535	0.9206	0.9054	0.881	0.8177	0.7024	0.7744	0.8305	0.8189	0.8809	0.9304	0.9661	0.7661	0.7184	0.782	0.7629	0.7663	1.0638	1.0018	0.98	0.7485	0.6895	0.7333	0.7359	0.7632	0.9855	0.9262	0.9305	0.1439	0.3759	0.5135	0.7303	0.6969	0.8833	0.9173	0.9031	0.7312	0.7612	0.7925	0.7954	0.8207	0.8113	0.7348	0.877
	500	0.4147	0.5026	0.6735	0.6667	0.6868	0.7391	0.4495	0.5571	0.5851	0.4652	0.4769	0.6062	0.7331	0.6399	0.688	0.8324	0.6682	0.526	0.7038	0.641	0.7264	0.6435	0.8679	0.797	0.6156	0.3813	0.4875	0.5704	0.5404	0.8056	0.7507	0.6763	0.1673	0.4165	0.1245	0.4521	0.3925	0.5418	0.6682	0.606	0.463	0.2604	0.4711	0.6274	0.623	0.3496	0.3135	0.3988
	5001	0.1278	0.2083	0.4775	0.3776	0.3853	0.2652	0.079	0.1334	0.259	0.1722	0.1629	0.2724	0.4947	0.1786	0.2222	0.4124	0.3334	0.1695	0.3836	0.2553	0.3845	0.1929	0.4706	0.31	0.2586	0.0896	0.1271	0.2347	0.1716	0.3027	0.2366	0.1634	0.0355	0.1144	0.0231	0.1032	0.0943	0.1008	0.1741	0.1328	0.1223	0.1152	0.1338	0.2536	0.2352	0.0499	0.0498	0.0622
	50014	0.0429	0.0676	0.2287	0.1588	0.1429	0.0463	0.0114	0.0152	0.0887	0.0564	0.0656	0.0781	0.2441	0.0216	0.0323	0.0726	0.1032	0.0455	0.1502	0.0683	0.1338	0.0229	0.0888	0.034	0.0957	0.024	0.0349	0.0773	0.0428	0.0406	0.0469	0.0225	0.0078	0.0302	0.0071	0.0301	0.0173	0.008	0.0165	0.0154	0.0251	0.0376	0.0321	0.0453	0.0819	0.0107	0.0056	0.005
	500180	0.0113	0.0209	0.0928	0.0673	0.0572	-0.0031	-0.0016	0.0017	0.0408	0.0263	0.0044	0.0279	0.1209	-0.0015	0.0031	0.0088	0.0343	0.0131	0.0456	0.0234	0.0535	0.0029	0.0092	-0.0071	0.0245	0.0092	0.0087	0.0313	0.0147	0.0044	0.0003	0.0011	-0.0005	0.0088	0.0023	0.0072	0.0037	-0.0045	-0.0049	0.0035	0.0103	0.0114	0.0099	-0.0123	0.0359	0.0017	0.0084	-0.0001
	5002251	0.0092	0.022	0.0696	0.0405	0.0341	0.0119	-0.0026	-0.0001	0.0189	0.0118	-0.0028	0.0205	0.0384	-0.0059	0.0017	-0.0004	0.0164	0.0216	0.0183	0.0078	0.0246	-0.0013	-0.0009	-0.0094	0.0118	0.0026	-0.0005	0.0105	0.0033	0	-0.002	-0.0013	-0.0017	0.0043	0.0042	0.0031	-0.0014	-0.0009	-0.0071	0.0002	0.0029	0	0.0087	-0.0236	0.0118	0.0004	-0.0007	-0.002
	50027009	0.0176	0.0054	0.0282	0.0262	0.0452	-0.0077	-0.0011	-0.0004	0.0098	0.0021	-0.0037	0.0072	0.0232	-0.0045	-0.0013	0.0002	0.0131	0.0024	0.0109	0.0072	0.0146	0	-0.001	-0.0102	0.0045	0.001	0.0029	0.008	0.0026	-0.0008	-0.0017	0.0009	0.002	0.0002	0.0043	0.0047	0.0005	-0.0039	-0.0069	0.0026	0.0013	0.0015	0.0013	-0.0298	0.0035	0.0071	-0.0014	0.001
Chose y = 0.1 as intersection point for interpolation of Sigmoid		0.1	0.1	0.1	0.1	0.1	0.1	0.1	0.1	0.1	0.1	0.1	0.1	0.1	0.1	0.1	0.1	0.1	0.1	0.1	0.1	0.1	0.1	0.1	0.1	0.1	0.1	0.1	0.1	0.1	0.1	0.1	0.1	0.1	0.1	0.1	0.1	0.1	0.1	0.1	0.1	0.1	0.1	0.1	0.1	0.1	0.1	0.1	0.1
Interpolation (for titers)	Cohort	3mer	3mer	3mer	3mer	3mer	3mer	3mer	3mer	4mer	4mer	4mer	4mer	4mer	4mer	4mer	4mer	5mer	5mer	5mer	5mer	5mer	5mer	5mer	5mer	6mer	6mer	6mer	6mer	6mer	6mer	6mer	6mer	7mer	7mer	7mer	7mer	7mer	7mer	7mer	7mer	8mer	8mer	8mer	8mer	8mer	8mer	8mer	8mer
	Individual Mouse	UL	LL	UR	LR	O	377 = 054	378	379	UL	LL	UR	LR	O	380	381	382	UL	LL	UR	LR	O	383	384 = 053	385 = 052	UL	LL	UR	LR	O	386	387	388	UL	LL	UR	LR	O	389	390 = 055	391 = 056	UL	LL	UR	LR	O	392	393	394
		7850.47	20909.6	503869	144977	120066	17806.9	3875.35	7051.09	37382.6	14447.3	13758	34239.1	530621	9977.39	14108.7	37618.4	44636.3	11129.3	87182.2	20705.7	64373.1	12209.9	49110.5	20359	28975.8	4450.42	7167.43	24309.2	11310.5	20166.5	14146.8	8648.53	3953.17	5151.59	675.327	5403.71	4676.41	5048.19	9283.35	6853.11	6664.79	4790.2	7856.64	19175.3	23298.1	2373.73	2260.42	2980.6
Log transform of titers	Cohort	3mer	3mer	3mer	3mer	3mer	3mer	3mer	3mer	4mer	4mer	4mer	4mer	4mer	4mer	4mer	4mer	5mer	5mer	5mer	5mer	5mer	5mer	5mer	5mer	6mer	6mer	6mer	6mer	6mer	6mer	6mer	6mer	7mer	7mer	7mer	7mer	7mer	7mer	7mer	7mer	8mer	8mer	8mer	8mer	8mer	8mer	8mer	8mer
	Individual Mouse	UL	LL	UR	LR	O	377 = 054	378	379	UL	LL	UR	LR	O	380	381	382	UL	LL	UR	LR	O	383	384 = 053	385 = 052	UL	LL	UR	LR	O	386	387	388	UL	LL	UR	LR	O	389	390 = 055	391 = 056	UL	LL	UR	LR	O	392	393	394
		3.8949	4.32035	5.70232	5.1613	5.07942	4.25059	3.58831	3.84826	4.57267	4.15979	4.13855	4.53452	5.72478	3.99902	4.14949	4.5754	4.64969	4.04647	4.94043	4.31609	4.8087	4.08671	4.69117	4.30876	4.46204	3.6484	3.85536	4.38577	4.05348	4.30463	4.15066	3.93694	3.59695	3.71194	2.82951	3.73269	3.66991	3.70314	3.9677	3.83589	3.82379	3.68035	3.89524	4.28274	4.36732	3.37543	3.35419	3.4743
[truncated: 15 more columns]

## Sheet: Figure 3D H2 titers
		Individual Mice from each cohort (
H2 titers (all) (d42)	Cohort	3mer	3mer	3mer	3mer	3mer	3mer	3mer	3mer	4mer	4mer	4mer	4mer	4mer	4mer	4mer	4mer	5mer	5mer	5mer	5mer	5mer	5mer	5mer	5mer	6mer	6mer	6mer	6mer	6mer	6mer	6mer	6mer	7mer	7mer	7mer	7mer	7mer	7mer	7mer	7mer	8mer	8mer	8mer	8mer	8mer	8mer	8mer	8mer
	Individual Mouse	UL	LL	UR	LR	O	377 = 054	378	379	UL	LL	UR	LR	O	380	381	382	UL	LL	UR	LR	O	383	384 = 053	385 = 052	UL	LL	UR	LR	O	386	387	388	UL	LL	UR	LR	O	389	390 = 055	391 = 056	UL	LL	UR	LR	O	392	393	394
	Dilution Factor
	50	0.807	0.6443	0.8788	0.8037	0.8025	1.0315	0.984	1.0211	0.7782	0.8164	0.7203	0.7996	0.8134	0.9179	1.0176	1.0232	0.8158	0.7537	0.7939	0.7445	0.6745	1.0111	1.0487	1.0529	0.8378	0.8003	0.8099	0.8025	0.8147	1.0027	0.9861	0.9355	0.7303	0.7024	0.6658	0.6092	0.6888	0.9593	0.9405	0.9564	0.6866	0.7468	0.7307	0.8438	0.8558	0.8885	0.9564	0.9938
	500	0.6957	0.5033	0.7602	0.6608	0.6619	0.9062	0.643	0.807	0.6282	0.7179	0.5573	0.6814	0.7493	0.4585	0.8905	0.9139	0.7587	0.599	0.7396	0.679	0.5672	0.8819	0.9772	0.9212	0.7503	0.7281	0.7089	0.6853	0.7072	0.8824	0.7886	0.6819	0.4923	0.5792	0.4933	0.3752	0.4671	0.795	0.7261	0.6981	0.5414	0.5554	0.5303	0.6101	0.6831	0.547	0.7601	0.7471
	5001	0.4604	0.2418	0.5431	0.3884	0.3362	0.501	0.1953	0.3233	0.3755	0.4693	0.2531	0.4145	0.5422	0.1313	0.4914	0.5088	0.5756	0.2915	0.4571	0.4732	0.3385	0.5244	0.7275	0.4622	0.4979	0.4216	0.4371	0.3954	0.4122	0.4779	0.3162	0.23	0.2033	0.2664	0.1986	0.1485	0.1849	0.3328	0.2883	0.2702	0.2516	0.248	0.2161	0.275	0.3615	0.168	0.3585	0.2746
	50014	0.2157	0.1031	0.2644	0.1693	0.1381	0.1551	0.0843	0.1017	0.1763	0.2029	0.1116	0.1908	0.2832	0.0754	0.1487	0.1527	0.288	0.1144	0.2068	0.2045	0.1508	0.1582	0.2663	0.1328	0.1981	0.1801	0.1647	0.1506	0.152	0.1404	0.098	0.0832	0.0903	0.1258	0.0961	0.082	0.0918	0.0965	0.0924	0.0888	0.1117	0.1062	0.0965	0.1144	0.1531	0.0762	0.1152	0.0922
	500180	0.137	0.081	0.1422	0.1085	0.0882	0.0778	0.0663	0.0703	0.1113	0.1479	0.089	0.1232	0.2024	0.0678	0.0762	0.0783	0.1589	0.0848	0.1159	0.1172	0.1042	0.076	0.0934	0.0741	0.1253	0.1124	0.1065	0.0996	0.1141	0.0759	0.069	0.0662	0.0717	0.0785	0.0722	0.0642	0.0677	0.0694	0.0669	0.0687	0.0763	0.0749	0.0724	0.0736	0.0872	0.0652	0.0707	0.069
	5002251	0.0952	0.0749	0.1358	0.092	0.0781	0.0685	0.0676	0.0674	0.0875	0.1121	0.0812	0.108	0.1217	0.0668	0.0681	0.0676	0.11	0.0722	0.0881	0.0881	0.0859	0.0665	0.0696	0.0675	0.0895	0.0823	0.0797	0.0754	0.0861	0.0674	0.0673	0.0648	0.0635	0.1202	0.0628	0.0616	0.0644	0.0631	0.0644	0.0663	0.0718	0.0675	0.0661	0.0671	0.0719	0.0652	0.0643	0.0654
	50027009	0.1192	0.066	0.0969	0.0795	0.0667	0.0688	0.0668	0.0678	0.0728	0.0889	0.0761	0.0872	0.1039	0.0668	0.0698	0.067	0.091	0.0657	0.076	0.0762	0.074	0.068	0.0663	0.0671	0.0771	0.0713	0.0677	0.0683	0.0707	0.0675	0.0662	0.0639	0.0635	0.0649	0.0602	0.059	0.0604	0.0656	0.0637	0.0653	0.0626	0.0604	0.0609	0.0614	0.0668	0.0656	0.0655	0.0663
2ndary only control (for blank subtraction)		0.0657	0.0617	0.0611	0.061	0.0619	0.0705	0.0653	0.0667	0.0641	0.0616	0.0651	0.0627	0.0632	0.0678	0.067	0.0712	0.0622	0.061	0.0621	0.0668	0.0662	0.067	0.0681	0.0684	0.0641	0.0647	0.0621	0.0646	0.0643	0.0678	0.0758	0.067	0.0625	0.0618	0.0604	0.0598	0.0607	0.0659	0.0663	0.0662	0.0601	0.0589	0.0616	0.0606	0.0637	0.0639	0.0678	0.0657
Background subtracted	Cohort	3mer	3mer	3mer	3mer	3mer	3mer	3mer	3mer	4mer	4mer	4mer	4mer	4mer	4mer	4mer	4mer	5mer	5mer	5mer	5mer	5mer	5mer	5mer	5mer	6mer	6mer	6mer	6mer	6mer	6mer	6mer	6mer	7mer	7mer	7mer	7mer	7mer	7mer	7mer	7mer	8mer	8mer	8mer	8mer	8mer	8mer	8mer	8mer
	Individual Mouse	UL	LL	UR	LR	O	377 = 054	378	379	UL	LL	UR	LR	O	380	381	382	UL	LL	UR	LR	O	383	384 = 053	385 = 052	UL	LL	UR	LR	O	386	387	388	UL	LL	UR	LR	O	389	390 = 055	391 = 056	UL	LL	UR	LR	O	392	393	394
	Dilution Factor
	50	0.7413	0.5826	0.8177	0.7427	0.7406	0.961	0.9187	0.9544	0.7141	0.7548	0.6552	0.7369	0.7502	0.8501	0.9506	0.952	0.7536	0.6927	0.7318	0.6777	0.6083	0.9441	0.9806	0.9845	0.7737	0.7356	0.7478	0.7379	0.7504	0.9349	0.9103	0.8685	0.6678	0.6406	0.6054	0.5494	0.6281	0.8934	0.8742	0.8902	0.6265	0.6879	0.6691	0.7832	0.7921	0.8246	0.8886	0.9281
	500	0.63	0.4416	0.6991	0.5998	0.6	0.8357	0.5777	0.7403	0.5641	0.6563	0.4922	0.6187	0.6861	0.3907	0.8235	0.8427	0.6965	0.538	0.6775	0.6122	0.501	0.8149	0.9091	0.8528	0.6862	0.6634	0.6468	0.6207	0.6429	0.8146	0.7128	0.6149	0.4298	0.5174	0.4329	0.3154	0.4064	0.7291	0.6598	0.6319	0.4813	0.4965	0.4687	0.5495	0.6194	0.4831	0.6923	0.6814
	5001	0.3947	0.1801	0.482	0.3274	0.2743	0.4305	0.13	0.2566	0.3114	0.4077	0.188	0.3518	0.479	0.0635	0.4244	0.4376	0.5134	0.2305	0.395	0.4064	0.2723	0.4574	0.6594	0.3938	0.4338	0.3569	0.375	0.3308	0.3479	0.4101	0.2404	0.163	0.1408	0.2046	0.1382	0.0887	0.1242	0.2669	0.222	0.204	0.1915	0.1891	0.1545	0.2144	0.2978	0.1041	0.2907	0.2089
	50014	0.15	0.0414	0.2033	0.1083	0.0762	0.0846	0.019	0.035	0.1122	0.1413	0.0465	0.1281	0.22	0.0076	0.0817	0.0815	0.2258	0.0534	0.1447	0.1377	0.0846	0.0912	0.1982	0.0644	0.134	0.1154	0.1026	0.086	0.0877	0.0726	0.0222	0.0162	0.0278	0.064	0.0357	0.0222	0.0311	0.0306	0.0261	0.0226	0.0516	0.0473	0.0349	0.0538	0.0894	0.0123	0.0474	0.0265
	500180	0.0713	0.0193	0.0811	0.0475	0.0263	0.0073	0.001	0.0036	0.0472	0.0863	0.0239	0.0605	0.1392	0	0.0092	0.0071	0.0967	0.0238	0.0538	0.0504	0.038	0.009	0.0253	0.0057	0.0612	0.0477	0.0444	0.035	0.0498	0.0081	-0.0068	-0.0008	0.0092	0.0167	0.0118	0.0044	0.007	0.0035	0.0006	0.0025	0.0162	0.016	0.0108	0.013	0.0235	0.0013	0.0029	0.0033
	5002251	0.0295	0.0132	0.0747	0.031	0.0162	-0.002	0.0023	0.0007	0.0234	0.0505	0.0161	0.0453	0.0585	-0.001	0.0011	-0.0036	0.0478	0.0112	0.026	0.0213	0.0197	-0.0005	0.0015	-0.0009	0.0254	0.0176	0.0176	0.0108	0.0218	-0.0004	-0.0085	-0.0022	0.001	0.0584	0.0024	0.0018	0.0037	-0.0028	-0.0019	0.0001	0.0117	0.0086	0.0045	0.0065	0.0082	0.0013	-0.0035	-0.0003
	50027009	0.0535	0.0043	0.0358	0.0185	0.0048	-0.0017	0.0015	0.0011	0.0087	0.0273	0.011	0.0245	0.0407	-0.001	0.0028	-0.0042	0.0288	0.0047	0.0139	0.0094	0.0078	0.001	-0.0018	-0.0013	0.013	0.0066	0.0056	0.0037	0.0064	-0.0003	-0.0096	-0.0031	0.001	0.0031	-0.0002	-0.0008	-0.0003	-0.0003	-0.0026	-0.0009	0.0025	0.0015	-0.0007	0.0008	0.0031	0.0017	-0.0023	0.0006
Chose y = 0.1 as intersection point for interpolation of Sigmoid		0.1	0.1	0.1	0.1	0.1	0.1	0.1	0.1	0.1	0.1	0.1	0.1	0.1	0.1	0.1	0.1	0.1	0.1	0.1	0.1	0.1	0.1	0.1	0.1	0.1	0.1	0.1	0.1	0.1	0.1	0.1	0.1	0.1	0.1	0.1	0.1	0.1	0.1	0.1	0.1	0.1	0.1	0.1	0.1	0.1	0.1	0.1	0.1
Interpolation (for titers)	Cohort	3mer	3mer	3mer	3mer	3mer	3mer	3mer	3mer	4mer	4mer	4mer	4mer	4mer	4mer	4mer	4mer	5mer	5mer	5mer	5mer	5mer	5mer	5mer	5mer	6mer	6mer	6mer	6mer	6mer	6mer	6mer	6mer	7mer	7mer	7mer	7mer	7mer	7mer	7mer	7mer	8mer	8mer	8mer	8mer	8mer	8mer	8mer	8mer
	Individual Mouse	UL	LL	UR	LR	O	377 = 054	378	379	UL	LL	UR	LR	O	380	381	382	UL	LL	UR	LR	O	383	384 = 053	385 = 052	UL	LL	UR	LR	O	386	387	388	UL	LL	UR	LR	O	389	390 = 055	391 = 056	UL	LL	UR	LR	O	392	393	394
		145675	13450.1	348302	65756.6	29924.4	42663.7	6843.38	16746.1	69617.2	137629	14163.4	92709.2	628022	3033.52	42055.7	40672.7	341961	20390.7	89910	94901.5	40444.9	51023.2	122658	31487.6	96422.5	57421.6	59807.1	44025.3	47755	37031.1	14225.3	8832.7	8499.33	16801.3	8375.38	4283.08	7161	16739	13842.9	12657.4	15137.1	14648.1	9788.74	18487.6	40061	5223.42	23665.7	12565.4
Log transform of titers	Cohort	3mer	3mer	3mer	3mer	3mer	3mer	3mer	3mer	4mer	4mer	4mer	4mer	4mer	4mer	4mer	4mer	5mer	5mer	5mer	5mer	5mer	5mer	5mer	5mer	6mer	6mer	6mer	6mer	6mer	6mer	6mer	6mer	7mer	7mer	7mer	7mer	7mer	7mer	7mer	7mer	8mer	8mer	8mer	8mer	8mer	8mer	8mer	8mer
	Individual Mouse	UL	LL	UR	LR	O	377 = 054	378	379	UL	LL	UR	LR	O	380	381	382	UL	LL	UR	LR	O	383	384 = 053	385 = 052	UL	LL	UR	LR	O	386	387	388	UL	LL	UR	LR	O	389	390 = 055	391 = 056	UL	LL	UR	LR	O	392	393	394
		5.16339	4.12873	5.54196	4.81794	4.47602	4.63006	3.83527	4.22391	4.84272	5.13871	4.15117	4.96712	5.79797	3.48195	4.62383	4.6093	5.53398	4.30943	4.95381	4.97727	4.60686	4.70777	5.0887	4.49814	4.98418	4.75908	4.77675	4.6437	4.67902	4.56857	4.15306	3.94609	3.92938	4.22534	3.923	3.63176	3.85497	4.22373	4.14123	4.10235	4.18004	4.16578	3.99073	4.26688	4.60272	3.71795	4.37412	4.09918
[truncated: 15 more columns]

## Sheet: Figure 3D H3 titers
		Individual Mice from each cohort (
H3 titers (all) (d42)	Cohort	3mer	3mer	3mer	3mer	3mer	3mer	3mer	3mer	4mer	4mer	4mer	4mer	4mer	4mer	4mer	4mer	5mer	5mer	5mer	5mer	5mer	5mer	5mer	5mer	6mer	6mer	6mer	6mer	6mer	6mer	6mer	6mer	7mer	7mer	7mer	7mer	7mer	7mer	7mer	7mer	8mer	8mer	8mer	8mer	8mer	8mer	8mer	8mer
	Individual Mouse	UL	LL	UR	LR	O	377 = 054	378	379	UL	LL	UR	LR	O	380	381	382	UL	LL	UR	LR	O	383	384 = 053	385 = 052	UL	LL	UR	LR	O	386	387	388	UL	LL	UR	LR	O	389	390 = 055	391 = 056	UL	LL	UR	LR	O	392	393	394
	Dilution Factor
	50	0.8868	0.7413	0.9041	0.8653	0.8331	1.0308	0.9311	1.028	0.7811	0.8409	0.8551	0.8922	0.8714	0.9309	1.0659	1.0228	0.9468	0.8398	0.8395	0.8996	0.7956	1.0116	1.0225	1.0586	0.9371	0.8867	0.9186	0.8554	0.8436	1.0314	0.9928	0.9349	0.8219	0.8371	0.8419	0.8336	0.8466	0.899	0.918	0.9858	0.8664	0.8353	0.7869	0.8777	0.8672	0.8966	0.9628	0.9744
	500	0.7423	0.5146	0.8255	0.817	0.6925	0.8637	0.5258	0.8336	0.6742	0.7409	0.7279	0.7065	0.78	0.6795	0.9704	0.8484	0.8202	0.8091	0.7495	0.7758	0.5919	0.8838	0.9338	0.8875	0.8997	0.7584	0.8536	0.6398	0.5838	0.8053	0.8379	0.6315	0.546	0.6848	0.6794	0.6416	0.7217	0.5005	0.6906	0.8341	0.7444	0.6534	0.5018	0.7312	0.7296	0.6771	0.9073	0.8203
	5001	0.4426	0.2286	0.6136	0.6209	0.3636	0.3867	0.1506	0.3646	0.4361	0.569	0.4613	0.3524	0.6089	0.2464	0.7589	0.4021	0.5187	0.4622	0.3798	0.5436	0.2881	0.5113	0.5927	0.4275	0.6112	0.432	0.5724	0.2894	0.2359	0.3585	0.4804	0.2036	0.2014	0.3262	0.3193	0.2921	0.3591	0.1397	0.247	0.4828	0.4469	0.3075	0.1834	0.3803	0.4145	0.2432	0.7313	0.4246
	50014	0.2056	0.1059	0.3298	0.3529	0.1649	0.1251	0.0751	0.1097	0.2111	0.3228	0.2147	0.1438	0.3752	0.0877	0.3146	0.119	0.2426	0.2137	0.1661	0.2563	0.1387	0.1517	0.1913	0.1208	0.3039	0.1791	0.2828	0.1171	0.0996	0.1066	0.1315	0.0801	0.0868	0.1234	0.1362	0.1215	0.1415	0.0703	0.0873	0.1341	0.1898	0.1309	0.0915	0.1442	0.172	0.0823	0.3077	0.1235
	500180	0.1224	0.0802	0.1464	0.1785	0.0942	0.0735	0.0634	0.0696	0.1136	0.2137	0.1421	0.0913	0.2135	0.0673	0.0978	0.0698	0.1137	0.1085	0.0891	0.1263	0.089	0.0752	0.078	0.0703	0.1596	0.0941	0.1579	0.0804	0.0746	0.0705	0.0712	0.0635	0.078	0.0818	0.0839	0.0817	0.0852	0.0634	0.0666	0.0691	0.1199	0.0994	0.0729	0.085	0.1004	0.0658	0.1004	0.0702
	5002251	0.1021	0.0748	0.1257	0.1296	0.0778	0.0668	0.0648	0.063	0.0849	0.131	0.095	0.0777	0.1172	0.0633	0.0669	0.0646	0.0816	0.0826	0.077	0.0862	0.0751	0.0649	0.0663	0.066	0.1044	0.0772	0.0989	0.0713	0.0663	0.0626	0.0638	0.0613	0.072	0.0718	0.0739	0.0709	0.0725	0.0623	0.0632	0.0643	0.0851	0.0755	0.0728	0.0796	0.0779	0.0598	0.0658	0.0629
	50027009	0.1092	0.0659	0.0935	0.1063	0.0704	0.0668	0.0642	0.0642	0.0739	0.113	0.0965	0.0865	0.1067	0.0641	0.0646	0.065	0.0737	0.0801	0.0733	0.0742	0.0704	0.0656	0.064	0.0646	0.0847	0.071	0.0793	0.0687	0.0673	0.0708	0.0637	0.0619	0.0711	0.0688	0.074	0.0695	0.0738	0.062	0.0613	0.063	0.0858	0.0777	0.0712	0.0745	0.0762	0.0636	0.0622	0.0611
2ndary only control (for blank subtraction)		0.0723	0.0663	0.0716	0.0711	0.0672	0.0682	0.0673	0.0659	0.0677	0.0779	0.0693	0.0658	0.074	0.0654	0.0656	0.0648	0.0748	0.0824	0.0686	0.0716	0.0676	0.0646	0.0679	0.066	0.077	0.0708	0.076	0.0681	0.0667	0.0656	0.0634	0.0636	0.0716	0.0767	0.0748	0.0712	0.0762	0.0614	0.062	0.0635	0.0759	0.0728	0.0706	0.074	0.0763	0.0614	0.062	0.0596
Background subtracted	Cohort	3mer	3mer	3mer	3mer	3mer	3mer	3mer	3mer	4mer	4mer	4mer	4mer	4mer	4mer	4mer	4mer	5mer	5mer	5mer	5mer	5mer	5mer	5mer	5mer	6mer	6mer	6mer	6mer	6mer	6mer	6mer	6mer	7mer	7mer	7mer	7mer	7mer	7mer	7mer	7mer	8mer	8mer	8mer	8mer	8mer	8mer	8mer	8mer
	Individual Mouse	UL	LL	UR	LR	O	377 = 054	378	379	UL	LL	UR	LR	O	380	381	382	UL	LL	UR	LR	O	383	384 = 053	385 = 052	UL	LL	UR	LR	O	386	387	388	UL	LL	UR	LR	O	389	390 = 055	391 = 056	UL	LL	UR	LR	O	392	393	394
	Dilution Factor
	50	0.8145	0.675	0.8325	0.7942	0.7659	0.9626	0.8638	0.9621	0.7134	0.763	0.7858	0.8264	0.7974	0.8655	1.0003	0.958	0.872	0.7574	0.7709	0.828	0.728	0.947	0.9546	0.9926	0.8601	0.8159	0.8426	0.7873	0.7769	0.9658	0.9294	0.8713	0.7503	0.7604	0.7671	0.7624	0.7704	0.8376	0.856	0.9223	0.7905	0.7625	0.7163	0.8037	0.7909	0.8352	0.9008	0.9148
	500	0.67	0.4483	0.7539	0.7459	0.6253	0.7955	0.4585	0.7677	0.6065	0.663	0.6586	0.6407	0.706	0.6141	0.9048	0.7836	0.7454	0.7267	0.6809	0.7042	0.5243	0.8192	0.8659	0.8215	0.8227	0.6876	0.7776	0.5717	0.5171	0.7397	0.7745	0.5679	0.4744	0.6081	0.6046	0.5704	0.6455	0.4391	0.6286	0.7706	0.6685	0.5806	0.4312	0.6572	0.6533	0.6157	0.8453	0.7607
	5001	0.3703	0.1623	0.542	0.5498	0.2964	0.3185	0.0833	0.2987	0.3684	0.4911	0.392	0.2866	0.5349	0.181	0.6933	0.3373	0.4439	0.3798	0.3112	0.472	0.2205	0.4467	0.5248	0.3615	0.5342	0.3612	0.4964	0.2213	0.1692	0.2929	0.417	0.14	0.1298	0.2495	0.2445	0.2209	0.2829	0.0783	0.185	0.4193	0.371	0.2347	0.1128	0.3063	0.3382	0.1818	0.6693	0.365
	50014	0.1333	0.0396	0.2582	0.2818	0.0977	0.0569	0.0078	0.0438	0.1434	0.2449	0.1454	0.078	0.3012	0.0223	0.249	0.0542	0.1678	0.1313	0.0975	0.1847	0.0711	0.0871	0.1234	0.0548	0.2269	0.1083	0.2068	0.049	0.0329	0.041	0.0681	0.0165	0.0152	0.0467	0.0614	0.0503	0.0653	0.0089	0.0253	0.0706	0.1139	0.0581	0.0209	0.0702	0.0957	0.0209	0.2457	0.0639
	500180	0.0501	0.0139	0.0748	0.1074	0.027	0.0053	-0.0039	0.0037	0.0459	0.1358	0.0728	0.0255	0.1395	0.0019	0.0322	0.005	0.0389	0.0261	0.0205	0.0547	0.0214	0.0106	0.0101	0.0043	0.0826	0.0233	0.0819	0.0123	0.0079	0.0049	0.0078	-0.0001	0.0064	0.0051	0.0091	0.0105	0.009	0.002	0.0046	0.0056	0.044	0.0266	0.0023	0.011	0.0241	0.0044	0.0384	0.0106
	5002251	0.0298	0.0085	0.0541	0.0585	0.0106	-0.0014	-0.0025	-0.0029	0.0172	0.0531	0.0257	0.0119	0.0432	-0.0021	0.0013	-0.0002	0.0068	0.0002	0.0084	0.0146	0.0075	0.0003	-0.0016	0	0.0274	0.0064	0.0229	0.0032	-0.0004	-0.003	0.0004	-0.0023	0.0004	-0.0049	-0.0009	-0.0003	-0.0037	0.0009	0.0012	0.0008	0.0092	0.0027	0.0022	0.0056	0.0016	-0.0016	0.0038	0.0033
	50027009	0.0369	-0.0004	0.0219	0.0352	0.0032	-0.0014	-0.0031	-0.0017	0.0062	0.0351	0.0272	0.0207	0.0327	-0.0013	-0.001	0.0002	-0.0011	-0.0023	0.0047	0.0026	0.0028	0.001	-0.0039	-0.0014	0.0077	0.0002	0.0033	0.0006	0.0006	0.0052	0.0003	-0.0017	-0.0005	-0.0079	-0.0008	-0.0017	-0.0024	0.0006	-0.0007	-0.0005	0.0099	0.0049	0.0006	0.0005	-0.0001	0.0022	0.0002	0.0015
Chose y = 0.1 as intersection point for interpolation of Sigmoid
Interpolation (for titers)	Cohort	3mer	3mer	3mer	3mer	3mer	3mer	3mer	3mer	4mer	4mer	4mer	4mer	4mer	4mer	4mer	4mer	5mer	5mer	5mer	5mer	5mer	5mer	5mer	5mer	6mer	6mer	6mer	6mer	6mer	6mer	6mer	6mer	7mer	7mer	7mer	7mer	7mer	7mer	7mer	7mer	8mer	8mer	8mer	8mer	8mer	8mer	8mer	8mer
	Individual Mouse	UL	LL	UR	LR	O	377 = 054	378	379	UL	LL	UR	LR	O	380	381	382	UL	LL	UR	LR	O	383	384 = 053	385 = 052	UL	LL	UR	LR	O	386	387	388	UL	LL	UR	LR	O	389	390 = 055	391 = 056	UL	LL	UR	LR	O	392	393	394
		92704.7	11456.2	387161	624756	40182.6	25172.8	3829.55	22680.6	102943	829253	128761	32832.3	1.06225e+06	10711.3	199128	28684	120386	55665.6	33410.5	174793	23458.9	49415.7	67094.5	30703.5	237610	53824.4	212917	17986.5	11017.1	23729.7	44231.6	7430.03	6974.64	19197.7	20795.9	17621.8	24595.1	3541.31	10967.7	44914	66383.2	20841	5937.93	30567.8	46960.9	10574.8	187189	35454
Log transform of titers	Cohort	3mer	3mer	3mer	3mer	3mer	3mer	3mer	3mer	4mer	4mer	4mer	4mer	4mer	4mer	4mer	4mer	5mer	5mer	5mer	5mer	5mer	5mer	5mer	5mer	6mer	6mer	6mer	6mer	6mer	6mer	6mer	6mer	7mer	7mer	7mer	7mer	7mer	7mer	7mer	7mer	8mer	8mer	8mer	8mer	8mer	8mer	8mer	8mer
	Individual Mouse	UL	LL	UR	LR	O	377 = 054	378	379	UL	LL	UR	LR	O	380	381	382	UL	LL	UR	LR	O	383	384 = 053	385 = 052	UL	LL	UR	LR	O	386	387	388	UL	LL	UR	LR	O	389	390 = 055	391 = 056	UL	LL	UR	LR	O	392	393	394
		4.9671	4.05904	5.58789	5.79571	4.60404	4.40093	3.58315	4.35565	5.0126	5.91869	5.10979	4.5163	6.02622	4.02984	5.29913	4.45764	5.08058	4.74559	4.52388	5.24252	4.37031	4.69387	4.82669	4.48719	5.37586	4.73098	5.32821	4.25495	4.04207	4.37529	4.64573	3.87099	3.84352	4.28325	4.31798	4.24605	4.39085	3.54916	4.04012	4.65238	4.82206	4.31892	3.77364	4.48526	4.67174	4.02427	5.27228	4.54966
[truncated: 15 more columns]

[truncated: 7 more sheets: Figure 3D H4 titers, Figure 3D H5 titers, Figure 3D H7 titers, Figure 3D H9 titers, Figure 3D B titers, Figure 3D H3HK68 titers, Figure 3D H1SI06 titers]
