# Supplementary material for: A modular platform to display multiple hemagglutinin subtypes on a single immunogen
Source: eLife. 2025 Dec 8;13:RP97364. doi: 10.7554/eLife.97364 (PMC12685301; doi:10.7554/eLife.97364)
Supplement: Figure 5—source data 2. [file elife-97364-fig5-data2.xlsx]

## Sheet: Plate Format
	1	2	3	4	5	6	7	8	9	10	11	12			1	2	3	4	5	6	7	8	9	10	11	12
A	S5V2-29	S5V2-29	5J8	5J8	2G1	2G1	3E5	3E5	P2-D9	P2-D9	H5.3	H5.3		A	H7.167	H7.167	H1209	H1209	MEDI8852	MEDI8852	H7.167	H7.167	H1209	H1209	MEDI8852	MEDI8852
B														B
C														C
D														D
E														E
F														F
G														G
H	No primary	No primary	No primary	No primary	No primary	No primary	No primary	No primary	No primary	No primary	No primary	No primary		H	No primary	No primary	No primary	No primary	No primary	No primary	No primary	No primary	No primary	No primary	No primary	No primary

## Sheet: raw data
##BLOCKS= 3
Plate:	H1-H4 4mer	1.3	PlateFormat	Endpoint	Absorbance	Raw	FALSE	1						1	450	1	12	96	1	8
	Temperature(¡C)	1	2	3	4	5	6	7	8	9	10	11	12
	21	1.1418	1.1157	1.0268	1.0375	1.0714	1.0897	1.0947	1.0918	1.0602	1.0671	0.0852	0.0879
		1.0934	1.0795	1.0156	1.0065	1.0706	1.0586	1.0829	1.0658	1.0568	1.0579	0.0559	0.0583
		1.0164	1.0188	1.0064	0.984	1.033	1.0242	1.0117	1.0244	1.0127	1.0141	0.0533	0.0539
		0.8424	0.8295	0.851	0.8155	0.8516	0.8453	0.8462	0.8445	0.7145	0.7387	0.0518	0.0504
		0.3521	0.3884	0.3803	0.3566	0.3942	0.3683	0.3989	0.3653	0.2694	0.2602	0.0495	0.0514
		0.1629	0.0853	0.094	0.1071	0.097	0.094	0.0961	0.092	0.0753	0.0735	0.0498	0.0518
		0.0545	0.0537	0.0542	0.061	0.0547	0.0593	0.0563	0.0548	0.053	0.0543	0.054	0.05
		0.0504	0.0503	0.0604	0.0524	0.0507	0.052	0.0655	0.0514	0.0544	0.0514	0.0503	0.0558
~End
Plate:	H5-B 4mer	1.3	PlateFormat	Endpoint	Absorbance	Raw	FALSE	1						1	450	1	12	96	1	8
	Temperature(¡C)	1	2	3	4	5	6	7	8	9	10	11	12
	21	1.0464	1.0272	0.0694	0.0604	0.4145	0.4128	0.296	0.2684	0.2422	0.2586	0.9823	0.9748
		1.0208	1.02	0.0512	0.0557	0.112	0.102	0.2439	0.2348	0.082	0.0793	0.9897	1.008
		0.9957	0.979	0.0526	0.0564	0.0596	0.0584	0.2237	0.2036	0.0576	0.0557	0.9586	0.9689
		0.8629	0.829	0.0552	0.0512	0.0528	0.053	0.1102	0.0945	0.0535	0.0527	0.779	0.7626
		0.4258	0.3665	0.067	0.0591	0.0548	0.0518	0.0579	0.0566	0.0544	0.053	0.3092	0.266
		0.1018	0.1096	0.0664	0.0585	0.0523	0.0532	0.051	0.0513	0.0534	0.0528	0.0804	0.0794
		0.0578	0.0578	0.0538	0.0524	0.0519	0.0535	0.0514	0.0508	0.0543	0.0519	0.0542	0.0548
		0.0542	0.0527	0.0531	0.0528	0.052	0.0504	0.0505	0.0528	0.0519	0.0551	0.0515	0.0542
~End
Plate:	H1-H4 / H5-B	1.3	PlateFormat	Endpoint	Absorbance	Raw	FALSE	1						1	450	1	12	96	1	8
	Temperature(¡C)	1	2	3	4	5	6	7	8	9	10	11	12
	21	0.1208	0.0777	0.3539	0.3373	0.061	0.0633	0.9125	0.9326	0.9834	1.0002	0.0988	0.1285
		0.072	0.0537	0.2123	0.2191	0.0522	0.0523	0.9204	0.9427	0.9778	0.9821	0.0555	0.0665
		0.0525	0.0503	0.1161	0.1162	0.0522	0.0549	0.9053	0.9031	0.9682	0.9303	0.053	0.0558
		0.0512	0.0532	0.0642	0.0616	0.0843	0.0567	0.681	0.6142	0.7348	0.6344	0.0527	0.0556
		0.0524	0.056	0.0626	0.0522	0.0515	0.051	0.211	0.1778	0.2507	0.1847	0.0517	0.0543
		0.0519	0.0564	0.0569	0.0536	0.0559	0.053	0.0692	0.0656	0.0734	0.0655	0.0526	0.0937
		0.0523	0.0528	0.0594	0.0569	0.0525	0.0551	0.0765	0.0543	0.0541	0.0546	0.0551	0.0634
		0.0542	0.0531	0.0519	0.055	0.0524	0.0557	0.0526	0.0525	0.0523	0.0528	0.0525	0.0543
~End
Original Filename: 20230823 ELISA - 2x4mer BOAS Characterization repeat; Date Last Saved: 8/23/2023 3:35:55 PM
Plate:	2X4mer BoaS NP	1.3	PlateFormat	Endpoint	Absorbance	Raw	FALSE	1
	Temperature(¡C)	1	2	3	4	5	6	7	8	9	10	11	12
	26	1.2149	1.1656	1.0768	1.0806	1.1155	1.1059	1.0971	1.1042	1.0968	1.1034	1.0732	1.108
		1.1	1.1152	1.01	1.0059	1.044	1.0534	1.0818	1.0757	1.0986	1.0998	1.071	1.0246
		1.0955	1.0944	1.0058	1.019	1.0502	1.0376	1.0384	1.049	1.0814	1.0798	1.0565	1.0142
		1.024	1.0433	0.9777	0.9789	0.9754	0.9516	0.9127	0.9197	0.8939	0.8938	0.9337	0.9314
		0.8921	0.861	0.6929	0.6887	0.6454	0.6463	0.5782	0.5648	0.4948	0.4947	0.5651	0.5702
		0.6942	0.6679	0.3329	0.3314	0.3125	0.3062	0.2656	0.2602	0.2384	0.2476	0.2569	0.257
		0.5912	0.5754	0.2226	0.2272	0.2343	0.232	0.2191	0.2105	0.2018	0.2103	0.2052	0.4754
		0.204	0.1966	0.1967	0.1945	0.1933	0.1868	0.192	0.1927	0.1953	0.2019	0.1958	0.2186
~End
Plate:	SpyCatcher NP	1.3	PlateFormat	Endpoint	Absorbance	Raw	FALSE	1
	Temperature(¡C)	1	2	3	4	5	6	7	8	9	10	11	12
	26	0.4772	0.4827	0.1936	0.1851	0.2475	0.2536	0.1759	0.1977	0.3821	0.3855	0.2293	0.3074
		0.183	0.1928	0.1332	0.1325	0.1437	0.1483	0.1292	0.1433	0.1588	0.1624	0.1448	0.1787
		0.1812	0.1683	0.136	0.1317	0.1346	0.1436	0.1454	0.1461	0.154	0.1456	0.143	0.1722
		0.1436	0.1353	0.1306	0.1318	0.1334	0.1346	0.1823	0.1417	0.1546	0.1373	0.1425	0.1655
		0.1435	0.1286	0.1278	0.1364	0.135	0.1408	0.1438	0.1451	0.1435	0.1475	0.142	0.1711
		0.1415	0.1341	0.1348	0.1374	0.1375	0.1401	0.1424	0.1407	0.1458	0.1535	0.153	0.1699
		0.1492	0.136	0.1364	0.1315	0.1341	0.1502	0.1441	0.1429	0.1449	0.1364	0.1478	0.1645
		0.1356	0.1287	0.1231	0.1326	0.1332	0.1263	0.1321	0.132	0.143	0.1384	0.1404	0.1533
Plate:	2X4mer NP / SpyCatcher NP	1.3	PlateFormat	Endpoint	Absorbance	Raw	FALSE	1
	Temperature(¡C)	1	2	3	4	5	6	7	8	9	10	11	12
	26	1.0817	1.0671	1.0949	1.0964	0.2554	0.2554	0.1437	0.1525	0.1587	0.2243	0.1732	0.198
		1.0493	1.0053	1.0525	1.0654	0.214	0.2209	0.144	0.151	0.1834	0.1653	0.154	0.167
		1.0042	0.9659	1.0237	1.0046	0.2162	0.2146	0.1503	0.145	0.1708	0.1592	0.1525	0.1724
		0.7587	0.7221	0.7909	0.7873	0.2218	0.2258	0.1565	0.1665	0.1439	0.1656	0.1623	0.1755
		0.2977	0.2938	0.3391	0.3424	0.1568	0.1624	0.0989	0.0971	0.1026	0.1092	0.098	0.1114
		0.1756	0.1712	0.1793	0.177	0.155	0.1569	0.0882	0.0957	0.095	0.0969	0.0922	0.1014
		0.1704	0.1466	0.1582	0.1597	0.1643	0.1572	0.0964	0.0965	0.0966	0.1061	0.0925	0.1052
		0.166	0.1589	0.1622	0.1549	0.1575	0.1648	0.0891	0.0951	0.0911	0.1044	0.1027	0.1233
~End
Original Filename: 20230629 ELISA - BoaS NP characterization; Date Last Saved: 6/29/2023 8:14:49 PM

## Sheet: baseline corrected
4mer BOAS (H1-H4)	Ab Conc. (mg/mL)	5J8		2G1		3E5		P2-D9		H5.3		H7.167		H1209		MEDI8852
	0.05	0.9704	0.9811	1.02005	1.03835	1.03625	1.03335	1.0073	1.0142	0.03215	0.03485	0.06715	0.02405	0.30045	0.28385	0.00695	0.00925
	0.005	0.9592	0.9501	1.01925	1.00725	1.02445	1.00735	1.0039	1.005	0.00285	0.00525	0.01835	5e-05	0.15885	0.16565	-0.00185	-0.00175
	0.0005	0.95	0.9276	0.98165	0.97285	0.95325	0.96595	0.9598	0.9612	0.00025	0.00085	-0.00115	-0.00335	0.06265	0.06275	-0.00185	0.00085
	5e-05	0.7946	0.7591	0.80025	0.79395	0.78775	0.78605	0.6616	0.6858	-0.00125	-0.00265	-0.00245	-0.00045	0.01075	0.00815	0.03025	0.00265
	5e-06	0.3239	0.3002	0.34285	0.31695	0.34045	0.30685	0.2165	0.2073	-0.00355	-0.00165	-0.00125	0.00235	0.00915	-0.00125	-0.00255	-0.00305
	5e-07	0.0376	0.0507	0.04565	0.04265	0.03765	0.03355	0.0224	0.0206	-0.00325	-0.00125	-0.00175	0.00275	0.00345	0.00015	0.00185	-0.00105
	5e-08	-0.0022	0.0046	0.00335	0.00795	-0.00215	-0.00365	0.0001	0.0014	0.00095	-0.00305	-0.00135	-0.00085	0.00595	0.00345	-0.00155	0.00105
4mer BOAS (H5-B)	Ab Conc. (mg/mL)	5J8		2G1		3E5		P2-D9		H5.3		H7.167		H1209		MEDI8852
	0.05	0.01645	0.00745	0.3633	0.3616	0.24435	0.21675	0.1887	0.2051	0.92945	0.92195	0.85995	0.88005	0.93085	0.94765	0.0454	0.0751
	0.005	-0.00175	0.00275	0.0608	0.0508	0.19225	0.18315	0.0285	0.0258	0.93685	0.95515	0.86785	0.89015	0.92525	0.92955	0.0021	0.0131
	0.0005	-0.00035	0.00345	0.0084	0.0072	0.17205	0.15195	0.0041	0.0022	0.90575	0.91605	0.85275	0.85055	0.91565	0.87775	-0.0004	0.0024
	5e-05	0.00225	-0.00175	0.0016	0.0018	0.05855	0.04285	-6.93889e-18	-0.0008	0.72615	0.70975	0.62845	0.56165	0.68225	0.58185	-0.0007	0.0022
	5e-06	0.01405	0.00615	0.0036	0.0006	0.00625	0.00495	0.0009	-0.0005	0.25635	0.21315	0.15845	0.12525	0.19815	0.13215	-0.0017	0.0009
	5e-07	0.01345	0.00555	0.0011	0.002	-0.00065	-0.00035	-0.0001	-0.0007	0.02755	0.02655	0.01665	0.01305	0.02085	0.01295	-0.0008	0.0403
	5e-08	0.00085	-0.00055	0.0007	0.0023	-0.00025	-0.00085	0.0008	-0.0016	0.00135	0.00195	0.02395	0.00175	0.00155	0.00205	0.0017	0.01
SpyCatcher NP	Ab Conc. (mg/mL)	5J8		2G1		3E5		P2-D9		H5.3		H7.167		H1209		MEDI8852
	0.05	0.1936	0.1851	0.2475	0.2536	0.1759	0.1977	0.3821	0.3855	0.2293	0.3074	0.1437	0.1525	0.1587	0.2243	0.1732	0.198
	0.005	0.1332	0.1325	0.1437	0.1483	0.1292	0.1433	0.1588	0.1624	0.1448	0.1787	0.144	0.151	0.1834	0.1653	0.154	0.167
	0.0005	0.136	0.1317	0.1346	0.1436	0.1454	0.1461	0.154	0.1456	0.143	0.1722	0.1503	0.145	0.1708	0.1592	0.1525	0.1724
	5e-05	0.1306	0.1318	0.1334	0.1346	0.1823	0.1417	0.1546	0.1373	0.1425	0.1655	0.1565	0.1665	0.1439	0.1656	0.1623	0.1755
	5e-06	0.1278	0.1364	0.135	0.1408	0.1438	0.1451	0.1435	0.1475	0.142	0.1711	0.0989	0.0971	0.1026	0.1092	0.098	0.1114
	5e-07	0.1348	0.1374	0.1375	0.1401	0.1424	0.1407	0.1458	0.1535	0.153	0.1699	0.0882	0.0957	0.095	0.0969	0.0922	0.1014
	5e-08	0.1364	0.1315	0.1341	0.1502	0.1441	0.1429	0.1449	0.1364	0.1478	0.1645	0.0964	0.0965	0.0966	0.1061	0.0925	0.1052
	0	0.1231	0.1326	0.1332	0.1263	0.1321	0.132	0.143	0.1384	0.1404	0.1533	0.0891	0.0951	0.0911	0.1044	0.1027	0.1233
2X4mer BOAS NP	Ab Conc. (mg/mL)	5J8		2G1		3E5		P2-D9		H5.3		H7.167		H1209		MEDI8852
	0.05	1.0768	1.0806	1.1155	1.1059	1.0971	1.1042	1.0968	1.1034	1.0732	1.108	1.0817	1.0671	1.0949	1.0964	0.2554	0.2554
	0.005	1.01	1.0059	1.044	1.0534	1.0818	1.0757	1.0986	1.0998	1.071	1.0246	1.0493	1.0053	1.0525	1.0654	0.214	0.2209
	0.0005	1.0058	1.019	1.0502	1.0376	1.0384	1.049	1.0814	1.0798	1.0565	1.0142	1.0042	0.9659	1.0237	1.0046	0.2162	0.2146
	5e-05	0.9777	0.9789	0.9754	0.9516	0.9127	0.9197	0.8939	0.8938	0.9337	0.9314	0.7587	0.7221	0.7909	0.7873	0.2218	0.2258
	5e-06	0.6929	0.6887	0.6454	0.6463	0.5782	0.5648	0.4948	0.4947	0.5651	0.5702	0.2977	0.2938	0.3391	0.3424	0.1568	0.1624
	5e-07	0.3329	0.3314	0.3125	0.3062	0.2656	0.2602	0.2384	0.2476	0.2569	0.257	0.1756	0.1712	0.1793	0.177	0.155	0.1569
	5e-08	0.2226	0.2272	0.2343	0.232	0.2191	0.2105	0.2018	0.2103	0.2052	0.4754	0.1704	0.1466	0.1582	0.1597	0.1643	0.1572
	0	0.1967	0.1945	0.1933	0.1868	0.192	0.1927	0.1953	0.2019	0.1958	0.2186	0.166	0.1589	0.1622	0.1549	0.1575	0.1648
