# Supplementary material for: A modular platform to display multiple hemagglutinin subtypes on a single immunogen
Source: eLife. 2025 Dec 8;13:RP97364. doi: 10.7554/eLife.97364 (PMC12685301; doi:10.7554/eLife.97364)
Supplement: Figure 6—source data 1. [file elife-97364-fig6-data1.xlsx]

## Sheet: raw ELISA data (6B-6E)
raw		SpyCatcher NP control group d42					2x4mer BOAS NP d42								raw		SpyCatcher NP control group d42					2x4mer BOAS NP d42
coating antigen	Dilution	UL	LL	UR	LR	O	UL	LL	UR	LR	O	D2 H1-1/H3-1	D2 H1-1/H3-1		coating antigen	Dilution	UL	LL	UR	LR	O	UL	LL	UR	LR	O	D2 H1-1/H3-1	D2 H1-1/H3-1
SpyCatcher NP	50	0.8999	0.8149	0.8427	0.8923	0.854	0.8956	0.8932	0.8631	0.8983	0.8914	0.0506	0.0509		H1-H4 4mer BOAS	50	0.0707	0.0825	0.0848	0.082	0.0939	0.8542	0.8447	0.8384	0.8478	0.8724	0.2641	0.2916
	500	0.6644	0.676	0.684	0.6753	0.6943	0.7209	0.7771	0.6469	0.7689	0.6258	0.0487	0.0493			500	0.0562	0.0581	0.0548	0.0572	0.0565	0.8453	0.8458	0.8307	0.839	0.8557	0.2973	0.2579
	5001	0.2795	0.2977	0.3003	0.2528	0.3188	0.2613	0.3561	0.2146	0.3211	0.2014	0.0496	0.0499			5001	0.0479	0.0479	0.0482	0.0488	0.0488	0.5052	0.5546	0.528	0.5827	0.5844	0.1419	0.1326
	50014	0.0851	0.0772	0.0845	0.0725	0.0821	0.0716	0.087	0.0653	0.0799	0.0635	0.0501	0.0496			50014	0.0474	0.0478	0.0477	0.049	0.0593	0.1424	0.1631	0.1514	0.1756	0.1715	0.0663	0.061
	500180	0.0534	0.0514	0.0541	0.0528	0.0536	0.0532	0.0554	0.0522	0.0546	0.0524	0.0492	0.0512			500180	0.0486	0.0481	0.0485	0.0496	0.0495	0.061	0.0642	0.0622	0.066	0.0646	0.0483	0.052
	5002251	0.0533	0.05	0.0529	0.0492	0.0503	0.0507	0.051	0.0505	0.0502	0.0515	0.0504	0.0507			5002251	0.0477	0.0507	0.0481	0.0494	0.0506	0.0517	0.0511	0.0499	0.0508	0.0504	0.0479	0.049
	50027009	0.0494	0.0499	0.0622	0.0692	0.0508	0.0496	0.0497	0.05	0.0504	0.0512	0.0494	0.0507			50027009	0.0495	0.0488	0.0491	0.0483	0.0484	0.049	0.0493	0.0543	0.0493	0.0498	0.05	0.0484
		0.0544	0.0507	0.05	0.0522	0.0508	0.0499	0.049	0.0505	0.0506	0.0565	0.0504	0.0522				0.0497	0.0487	0.0484	0.0486	0.0489	0.0486	0.0479	0.0495	0.0492	0.05	0.0499	0.0508
Baseline Corrected		SpyCatcher NP control group d42					2x4mer BOAS NP d42										SpyCatcher NP control group d42					2x4mer BOAS NP d42
coating antigen	Dilution	UL	LL	UR	LR	O	UL	LL	UR	LR	O	D2 H1-1/H3-1	D2 H1-1/H3-1		Baseline Corrected	Dilution	UL	LL	UR	LR	O	UL	LL	UR	LR	O	D2 H1-1/H3-1	D2 H1-1/H3-1
SpyCatcher NP	50	0.8455	0.7642	0.7927	0.8401	0.8032	0.8457	0.8442	0.8126	0.8477	0.8349	0.0002	-0.0013		coating antigen	50	0.021	0.0338	0.0364	0.0334	0.045	0.8056	0.7968	0.7889	0.7986	0.8224	0.2142	0.2408
	500	0.61	0.6253	0.634	0.6231	0.6435	0.671	0.7281	0.5964	0.7183	0.5693	-0.0017	-0.0029		H1-H4 4mer BOAS	500	0.0065	0.0094	0.0064	0.0086	0.0076	0.7967	0.7979	0.7812	0.7898	0.8057	0.2474	0.2071
	5001	0.2251	0.247	0.2503	0.2006	0.268	0.2114	0.3071	0.1641	0.2705	0.1449	-0.0008	-0.0023			5001	-0.0018	-0.0008	-0.0002	0.0002	-0.0001	0.4566	0.5067	0.4785	0.5335	0.5344	0.092	0.0818
	50014	0.0307	0.0265	0.0345	0.0203	0.0313	0.0217	0.038	0.0148	0.0293	0.007	-0.0003	-0.0026			50014	-0.0023	-0.0009	-0.0007	0.0004	0.0104	0.0938	0.1152	0.1019	0.1264	0.1215	0.0164	0.0102
	500180	-0.001	0.0007	0.0041	0.0006	0.0028	0.0033	0.0064	0.0017	0.004	-0.0041	-0.0012	-0.001			500180	-0.0011	-0.0006	0.0001	0.001	0.0006	0.0124	0.0163	0.0127	0.0168	0.0146	-0.0016	0.0012
	5002251	-0.0011	-0.0007	0.0029	-0.003	-0.0005	0.0008	0.002	0	-0.0004	-0.005	0	-0.0015			5002251	-0.002	0.002	-0.0003	0.0008	0.0017	0.0031	0.0032	0.0004	0.0016	0.0004	-0.002	-0.0018
	50027009	-0.005	-0.0008	0.0122	0.017	0	-0.0003	0.0007	-0.0005	-0.0002	-0.0053	-0.001	-0.0015			50027009	-0.0002	0.0001	0.0007	-0.0003	-0.0005	0.0004	0.0014	0.0048	0.0001	-0.0002	0.0001	-0.0024
		0.1	0.1	0.1	0.1	0.1	0.1	0.1	0.1	0.1	0.1	0.1	0.1				0.1	0.1	0.1	0.1	0.1	0.1	0.1	0.1	0.1	0.1	0.1	0.1
raw		SpyCatcher NP control group d42					2x4mer BOAS NP d42								raw		SpyCatcher NP control group d42					2x4mer BOAS NP d42
coating antigen	Dilution	UL	LL	UR	LR	O	UL	LL	UR	LR	O	D2 H1-1/H3-1	D2 H1-1/H3-1		coating antigen	Dilution	UL	LL	UR	LR	O						D2 H1-1/H3-1	D2 H1-1/H3-1
2x4mer BOAS NP	50	0.5982	0.5234	0.4899	0.6061	0.549	0.8329	0.8249	0.8084	0.8095	0.83	0.228	0.239		H5-B 4mer BOAS	50	0.0837	0.0825	0.1051	0.083	0.0805	0.8551	0.8499	0.8465	0.862	0.8704	0.1829	0.2446
	500	0.3018	0.2727	0.2753	0.3749	0.3543	0.8409	0.8282	0.824	0.8437	0.8264	0.2177	0.2291			500	0.0587	0.0574	0.062	0.0643	0.0571	0.831	0.7868	0.8064	0.8173	0.8208	0.1782	0.2289
	5001	0.0914	0.095	0.0922	0.1059	0.1158	0.6652	0.659	0.6066	0.6812	0.6676	0.1605	0.1562			5001	0.0507	0.051	0.0514	0.0509	0.0502	0.559	0.4741	0.4835	0.5471	0.56	0.1614	0.1661
	50014	0.0534	0.0532	0.0547	0.0562	0.0566	0.2375	0.228	0.2036	0.2669	0.2497	0.0698	0.0698			50014	0.0494	0.0503	0.0501	0.0513	0.0549	0.1726	0.1401	0.1388	0.1658	0.1715	0.0723	0.0704
	500180	0.0502	0.0489	0.0497	0.0512	0.0523	0.0796	0.0768	0.0692	0.0814	0.0828	0.0523	0.0525			500180	0.0516	0.0497	0.0522	0.0532	0.0537	0.0702	0.0639	0.0688	0.067	0.0675	0.0514	0.0574
	5002251	0.0505	0.0473	0.0494	0.048	0.0489	0.0516	0.0505	0.0537	0.0534	0.052	0.0526	0.0518			5002251	0.0508	0.0514	0.0504	0.0522	0.0524	0.0575	0.0544	0.0574	0.0585	0.0555	0.0562	0.0534
	50027009	0.048	0.0487	0.0492	0.0502	0.0545	0.0506	0.0527	0.0505	0.0488	0.051	0.051	0.0515			50027009	0.051	0.0531	0.051	0.0516	0.0524	0.0525	0.0523	0.053	0.0556	0.0535	0.0506	0.0515
		0.0533	0.0486	0.0503	0.0495	0.0504	0.0481	0.0493	0.0503	0.0484	0.0484	0.0479	0.0525				0.0533	0.0502	0.0496	0.0503	0.0506	0.05	0.0498	0.0522	0.0508	0.0538	0.0531	0.0531
Baseline Corrected		SpyCatcher NP control group d42					2x4mer BOAS NP d42								Baseline Corrected		SpyCatcher NP control group d42					2x4mer BOAS NP d42
coating antigen	Dilution	UL	LL	UR	LR	O	UL	LL	UR	LR	O	D2 H1-1/H3-1	D2 H1-1/H3-1		coating antigen	Dilution	UL	LL	UR	LR	O	UL	LL	UR	LR	O	D2 H1-1/H3-1	D2 H1-1/H3-1
2x4mer BOAS NP	50	0.5449	0.4748	0.4396	0.5566	0.4986	0.7848	0.7756	0.7581	0.7611	0.7816	0.1801	0.1865		H5-B 4mer BOAS	50	0.0304	0.0323	0.0555	0.0327	0.0299	0.8051	0.8001	0.7943	0.8112	0.8166	0.1298	0.1915
	500	0.2485	0.2241	0.225	0.3254	0.3039	0.7928	0.7789	0.7737	0.7953	0.778	0.1698	0.1766			500	0.0054	0.0072	0.0124	0.014	0.0065	0.781	0.737	0.7542	0.7665	0.767	0.1251	0.1758
	5001	0.0381	0.0464	0.0419	0.0564	0.0654	0.6171	0.6097	0.5563	0.6328	0.6192	0.1126	0.1037			5001	-0.0026	0.0008	0.0018	0.0006	-0.0004	0.509	0.4243	0.4313	0.4963	0.5062	0.1083	0.113
	50014	0.0001	0.0046	0.0044	0.0067	0.0062	0.1894	0.1787	0.1533	0.2185	0.2013	0.0219	0.0173			50014	-0.0039	0.0001	0.0005	0.001	0.0043	0.1226	0.0903	0.0866	0.115	0.1177	0.0192	0.0173
	500180	-0.0031	0.0003	-0.0006	0.0017	0.0019	0.0315	0.0275	0.0189	0.033	0.0344	0.0044	0			500180	-0.0017	-0.0005	0.0026	0.0029	0.0031	0.0202	0.0141	0.0166	0.0162	0.0137	-0.0017	0.0043
	5002251	-0.0028	-0.0013	-0.0009	-0.0015	-0.0015	0.0035	0.0012	0.0034	0.005	0.0036	0.0047	-0.0007			5002251	-0.0025	0.0012	0.0008	0.0019	0.0018	0.0075	0.0046	0.0052	0.0077	0.0017	0.0031	0.0003
	50027009	-0.0053	0.0001	-0.0011	0.0007	0.0041	0.0025	0.0034	0.0002	0.0004	0.0026	0.0031	-0.001			50027009	-0.0023	0.0029	0.0014	0.0013	0.0018	0.0025	0.0025	0.0008	0.0048	-0.0003	-0.0025	-0.0016
		0.1	0.1	0.1	0.1	0.1	0.1	0.1	0.1	0.1	0.1	0.1	0.1				0.1	0.1	0.1	0.1	0.1	0.1	0.1	0.1	0.1	0.1	0.1	0.1
EPTs
coating antigen	SpyCatcher NP
Cohort	d42
SpyCatcher NP	15734.2	15985	17452.2	11982.8	19094.6
2x4mer NP	11974.2	20397.4	8862.92	16319.1	7563.58
coating antigen	2x4mer BOAS NP
Cohort	d42
SpyCatcher NP	1749.54	1807.18	1747.79	2695.58	2959.5
2x4mer NP	106628	97335.7	79625.7	126975	118231
coating antigen	H1-H4 4mer BOAS
Cohort	d42
SpyCatcher NP	50	50	50	50	50
2x4mer NP	40388.5	54506.6	46758	63221.6	60309.5
coating antigen	H5-B 4mer BOAS
Cohort	d42
SpyCatcher NP	50	50	50	50	50
2x4mer NP	62024.4	43858.7	40019.3	58961.6	61173.4

## Sheet: Figure 6B
log EPT	Control NP					BOAS NP
	4.19685	4.20371	4.24185	4.07856	4.28091	5.02787	4.98827	4.90105	5.10372	5.07273

## Sheet: Figure 6C
log EPT	Control NP					BOAS NP
	4.19685	4.20371	4.24185	4.07856	4.28091	3.24292	3.257	3.24249	3.43065	3.47122

## Sheet: Figure 6D
EPT		H1-H2-H3-H4					H5-H7-H9-B					SpyCatcher NP					2x4mer BOAS NP
	2x4mer BOAS NP	40388.5	54506.6	46758	63221.6	60309.5	62024.4	43858.7	40019.3	58961.6	61173.4	11974.2	20397.4	8862.92	16319.1	7563.58	106628	97335.7	79625.7	126975	118231
log transform		H1-H2-H3-H4					H5-H7-H9-B					SpyCatcher NP					2x4mer BOAS NP
	2x4mer BOAS NP	4.60626	4.73645	4.66986	4.80087	4.78039	4.79256	4.64206	4.60227	4.77057	4.78656	4.07825	4.30957	3.94758	4.2127	3.87873	5.02787	4.98827	4.90105	5.10372	5.07273

## Sheet: Figure 6E
EPT		H1-H2-H3-H4					H5-H7-H9-B					SpyCatcher NP					2x4mer BOAS NP
	SpyCatcher NP Control	50	50	50	50	50	50	50	50	50	50	15734.2	15985	17452.2	11982.8	19094.6	1749.54	1807.18	1747.79	2695.58	2959.5
log transform		H1-H2-H3-H4					H5-H7-H9-B					SpyCatcher NP					2x4mer BOAS NP
	SpyCatcher NP Control	1.69897	1.69897	1.69897	1.69897	1.69897	1.69897	1.69897	1.69897	1.69897	1.69897	4.19685	4.20371	4.24185	4.07856	4.28091	3.24292	3.257	3.24249	3.43065	3.47122

## Sheet: Figure 6F
raw		SpyCatcher NP control group d42					2x4mer BOAS NP d42						raw		SpyCatcher NP control group d42					2x4mer BOAS NP d42
coating antigen	Dilution	UL	LL	UR	LR	O	UL	LL	UR	LR	O		coating antigen	Dilution Factor	UL	LL	UR	LR	O	UL	LL	UR	LR	O
H1 MI15	50	0.1441	0.1769	0.1563	0.1747	0.1923	0.8896	0.9236	0.882	0.999	0.9702		H5 VN04	50	0.1367	0.1685	0.1594	0.166	0.1672	0.8868	0.7166	0.8295	0.8939	0.8644
	500	0.1223	0.1344	0.1327	0.1429	0.148	0.6457	0.7195	0.7257	0.9441	0.8233			500	0.1107	0.1175	0.126	0.1405	0.1329	0.7869	0.3912	0.5701	0.7961	0.7963
	5001	0.0975	0.0918	0.08	0.117	0.1249	0.2501	0.2741	0.3047	0.6204	0.4286			5001	0.1049	0.1078	0.1056	0.1092	0.1102	0.4578	0.1546	0.2069	0.4346	0.4277
	50014	0.113	0.0876	0.1033	0.11	0.1132	0.1314	0.138	0.1416	0.2094	0.1538			50014	0.1055	0.103	0.1018	0.1026	0.1043	0.1593	0.106	0.1126	0.1556	0.1493
	500180	0.1139	0.1237	0.1147	0.1101	0.121	0.1042	0.127	0.1214	0.1344	0.1359			500180	0.1056	0.1035	0.0995	0.0983	0.1013	0.1079	0.0976	0.1002	0.1056	0.1064
	5002251	0.1102	0.1181	0.1118	0.0818	0.1151	0.121	0.1211	0.1179	0.1199	0.1167			5002251	0.1075	0.105	0.1011	0.1014	0.1053	0.107	0.1	0.1033	0.1009	0.1013
	50027009	0.1071	0.1157	0.1392	0.1095	0.107	0.117	0.1195	0.1186	0.119	0.1228			50027009	0.1098	0.1074	0.1092	0.1065	0.1048	0.11	0.1044	0.102	0.1016	0.1045
	0	0.1113	0.0976	0.1148	0.1257	0.1261	0.1157	0.1125	0.1114	0.0858	0.0922			0	0.1032	0.1022	0.0994	0.1038	0.104	0.1084	0.0992	0.0986	0.0822	0.0817
Baseline Corrected		SpyCatcher NP control group d42					2x4mer BOAS NP d42								SpyCatcher NP control group d42					2x4mer BOAS NP d42
coating antigen	Dilution	UL	LL	UR	LR	O	UL	LL	UR	LR	O		Baseline Corrected	Dilution Factor	UL	LL	UR	LR	O	UL	LL	UR	LR	O
H1 MI15	50	0.0328	0.0793	0.0415	0.049	0.0662	0.7739	0.8111	0.7706	0.9132	0.878		coating antigen	50	0.0335	0.0663	0.06	0.0622	0.0632	0.7784	0.6174	0.7309	0.8117	0.7827
	500	0.011	0.0368	0.0179	0.0172	0.0219	0.53	0.607	0.6143	0.8583	0.7311		H5 VN04	500	0.0075	0.0153	0.0266	0.0367	0.0289	0.6785	0.292	0.4715	0.7139	0.7146
	5001	-0.0138	-0.0058	-0.0348	-0.0087	-0.0012	0.1344	0.1616	0.1933	0.5346	0.3364			5001	0.0017	0.0056	0.0062	0.0054	0.0062	0.3494	0.0554	0.1083	0.3524	0.346
	50014	0.0017	-0.01	-0.0115	-0.0157	-0.0129	0.0157	0.0255	0.0302	0.1236	0.0616			50014	0.0023	0.0008	0.0024	-0.0012	0.0003	0.0509	0.0068	0.014	0.0734	0.0676
	500180	0.0026	0.0261	-0.0001	-0.0156	-0.0051	-0.0115	0.0145	0.01	0.0486	0.0437			500180	0.0024	0.0013	0.0001	-0.0055	-0.0027	-0.0005	-0.0016	0.0016	0.0234	0.0247
	5002251	-0.0011	0.0205	-0.003	-0.0439	-0.011	0.0053	0.0086	0.0065	0.0341	0.0245			5002251	0.0043	0.0028	0.0017	-0.0024	0.0013	-0.0014	0.0008	0.0047	0.0187	0.0196
	50027009	-0.0042	0.0181	0.0244	-0.0162	-0.0191	0.0013	0.007	0.0072	0.0332	0.0306			50027009	0.0066	0.0052	0.0098	0.0027	0.0008	0.0016	0.0052	0.0034	0.0194	0.0228
		0.1	0.1	0.1	0.1	0.1	0.1	0.1	0.1	0.1	0.1				0.1	0.1	0.1	0.1	0.1	0.1	0.1	0.1	0.1	0.1
raw		SpyCatcher NP control group d42					2x4mer BOAS NP d42						raw		SpyCatcher NP control group d42					2x4mer BOAS NP d42
coating antigen	Dilution Factor	UL	LL	UR	LR	O	UL	LL	UR	LR	O		coating antigen	Dilution Factor	UL	LL	UR	LR	O	UL	LL	UR	LR	O
H2 JP57	50	0.1632	0.2262	0.1905	0.22	0.243	0.9037	0.8706	0.8453	0.8379	0.9688		H7 SH13	50	0.1509	0.1575	0.1536	0.1732	0.1554	0.8392	0.7107	0.7795	0.8444	0.833
	500	0.1277	0.1448	0.1448	0.161	0.1668	0.8244	0.7742	0.6513	0.6425	0.8373			500	0.1196	0.1256	0.1372	0.1413	0.1298	0.7086	0.3764	0.4863	0.585	0.575
	5001	0.1135	0.1201	0.1183	0.1225	0.1293	0.5062	0.4254	0.2912	0.2877	0.4519			5001	0.1078	0.1129	0.1195	0.1121	0.112	0.3323	0.1552	0.1898	0.2296	0.2338
	50014	0.1058	0.1199	0.1159	0.1157	0.1186	0.1741	0.1679	0.1427	0.1397	0.1685			50014	0.112	0.1084	0.1093	0.1084	0.1089	0.1389	0.1135	0.1163	0.1208	0.1179
	500180	0.1174	0.1173	0.115	0.1156	0.1108	0.1256	0.1189	0.123	0.119	0.1187			500180	0.1133	0.1174	0.1083	0.108	0.1137	0.1259	0.111	0.1192	0.1108	0.1104
	5002251	0.1127	0.1223	0.1158	0.1196	0.1189	0.1169	0.1188	0.1954	0.1157	0.1145			5002251	0.1142	0.1156	0.1107	0.1173	0.1214	0.1275	0.1272	0.1214	0.1265	0.1108
	50027009	0.1152	0.114	0.1102	0.1238	0.1195	0.2551	0.1158	0.1203	0.115	0.1177			50027009	0.1132	0.1063	0.1079	0.1088	0.1116	0.114	0.1074	0.1066	0.111	0.1097
	0	0.1154	0.1116	0.1138	0.112	0.1145	0.1163	0.1166	0.1118	0.1023	0.1023			0	0.1102	0.1131	0.1083	0.0912	0.1126	0.1133	0.1024	0.1018	0.0876	0.0916
Baseline Corrected		SpyCatcher NP control group d42					2x4mer BOAS NP d42								SpyCatcher NP control group d42					2x4mer BOAS NP d42
coating antigen	Dilution Factor	UL	LL	UR	LR	O	UL	LL	UR	LR	O		Baseline Corrected	Dilution Factor	UL	LL	UR	LR	O	UL	LL	UR	LR	O
H2 JP57	50	0.0478	0.1146	0.0767	0.108	0.1285	0.7874	0.754	0.7335	0.7356	0.8665		coating antigen	50	0.0407	0.0444	0.0453	0.082	0.0428	0.7259	0.6083	0.6777	0.7568	0.7414
	500	0.0123	0.0332	0.031	0.049	0.0523	0.7081	0.6576	0.5395	0.5402	0.735		H7 SH13	500	0.0094	0.0125	0.0289	0.0501	0.0172	0.5953	0.274	0.3845	0.4974	0.4834
	5001	-0.0019	0.0085	0.0045	0.0105	0.0148	0.3899	0.3088	0.1794	0.1854	0.3496			5001	-0.0024	-0.0002	0.0112	0.0209	-0.0006	0.219	0.0528	0.088	0.142	0.1422
	50014	-0.0096	0.0083	0.0021	0.0037	0.0041	0.0578	0.0513	0.0309	0.0374	0.0662			50014	0.0018	-0.0047	0.001	0.0172	-0.0037	0.0256	0.0111	0.0145	0.0332	0.0263
	500180	0.002	0.0057	0.0012	0.0036	-0.0037	0.0093	0.0023	0.0112	0.0167	0.0164			500180	0.0031	0.0043	0	0.0168	0.0011	0.0126	0.0086	0.0174	0.0232	0.0188
	5002251	-0.0027	0.0107	0.002	0.0076	0.0044	0.0006	0.0022	0.0836	0.0134	0.0122			5002251	0.004	0.0025	0.0024	0.0261	0.0088	0.0142	0.0248	0.0196	0.0389	0.0192
	50027009	-0.0002	0.0024	-0.0036	0.0118	0.005	0.1388	-0.0008	0.0085	0.0127	0.0154			50027009	0.003	-0.0068	-0.0004	0.0176	-0.001	0.0007	0.005	0.0048	0.0234	0.0181
		0.1	0.1	0.1	0.1	0.1	0.1	0.1	0.1	0.1	0.1				0.1	0.1	0.1	0.1	0.1	0.1	0.1	0.1	0.1	0.1
raw		SpyCatcher NP control group d42					2x4mer BOAS NP d42						raw		SpyCatcher NP control group d42					2x4mer BOAS NP d42
coating antigen	Dilution Factor	UL	LL	UR	LR	O	UL	LL	UR	LR	O		coating antigen	Dilution Factor	UL	LL	UR	LR	O	UL	LL	UR	LR	O
H3 KS17	50	0.1314	0.1612	0.1563	0.171	0.163	0.8969	0.8012	0.8555	0.9072	0.9402		H9 GD16	50	0.1316	0.1622	0.1381	0.1541	0.1581	0.9011	0.9099	0.8816	0.9476	0.9938
	500	0.1145	0.1291	0.1318	0.1518	0.1435	0.7673	0.486	0.7161	0.7217	0.8658			500	0.1117	0.1142	0.1171	0.1284	0.1239	0.8198	0.865	0.8541	0.8908	0.8382
	5001	0.1037	0.1145	0.1131	0.1192	0.1184	0.3839	0.1824	0.3065	0.3164	0.5071			5001	0.1047	0.1014	0.1026	0.1073	0.1043	0.4635	0.543	0.5124	0.6073	0.5212
	50014	0.1074	0.1059	0.1112	0.1124	0.1128	0.1459	0.1161	0.1289	0.1357	0.1734			50014	0.1035	0.1062	0.1044	0.1011	0.1116	0.1558	0.1811	0.1706	0.2066	0.1707
	500180	0.1126	0.1044	0.1091	0.1104	0.1098	0.1161	0.11	0.1143	0.1137	0.117			500180	0.1049	0.1016	0.1005	0.101	0.1025	0.1195	0.1118	0.0952	0.1138	0.1097
	5002251	0.1134	0.1151	0.1111	0.1115	0.113	0.1287	0.114	0.1173	0.1148	0.1157			5002251	0.1061	0.0994	0.1036	0.1032	0.1049	0.1018	0.0978	0.1006	0.1009	0.106
	50027009	0.1113	0.1129	0.1111	0.1102	0.1166	0.1169	0.1116	0.1109	0.1097	0.1112			50027009	0.1054	0.103	0.1006	0.0995	0.1058	0.1042	0.1021	0.0998	0.1032	0.1044
	0	0.1052	0.1061	0.1049	0.1062	0.1123	0.1093	0.1056	0.1019	0.066	0.094			0	0.1053	0.1024	0.1022	0.1115	0.1092	0.1029	0.1028	0.105	0.0942	0.1033
Baseline Corrected		SpyCatcher NP control group d42					2x4mer BOAS NP d42								SpyCatcher NP control group d42					2x4mer BOAS NP d42
coating antigen	Dilution Factor	UL	LL	UR	LR	O	UL	LL	UR	LR	O		Baseline Corrected	Dilution Factor	UL	LL	UR	LR	O	UL	LL	UR	LR	O
H3 KS17	50	0.0262	0.0551	0.0514	0.0648	0.0507	0.7876	0.6956	0.7536	0.8412	0.8462		coating antigen	50	0.0263	0.0598	0.0359	0.0426	0.0489	0.7982	0.8071	0.7766	0.8534	0.8905
	500	0.0093	0.023	0.0269	0.0456	0.0312	0.658	0.3804	0.6142	0.6557	0.7718		H9 GD16	500	0.0064	0.0118	0.0149	0.0169	0.0147	0.7169	0.7622	0.7491	0.7966	0.7349
	5001	-0.0015	0.0084	0.0082	0.013	0.0061	0.2746	0.0768	0.2046	0.2504	0.4131			5001	-0.0006	-0.001	0.0004	-0.0042	-0.0049	0.3606	0.4402	0.4074	0.5131	0.4179
	50014	0.0022	-0.0002	0.0063	0.0062	0.0005	0.0366	0.0105	0.027	0.0697	0.0794			50014	-0.0018	0.0038	0.0022	-0.0104	0.0024	0.0529	0.0783	0.0656	0.1124	0.0674
	500180	0.0074	-0.0017	0.0042	0.0042	-0.0025	0.0068	0.0044	0.0124	0.0477	0.023			500180	-0.0004	-0.0008	-0.0017	-0.0105	-0.0067	0.0166	0.009	-0.0098	0.0196	0.0064
	5002251	0.0082	0.009	0.0062	0.0053	0.0007	0.0194	0.0084	0.0154	0.0488	0.0217			5002251	0.0008	-0.003	0.0014	-0.0083	-0.0043	-0.0011	-0.005	-0.0044	0.0067	0.0027
	50027009	0.0061	0.0068	0.0062	0.004	0.0043	0.0076	0.006	0.009	0.0437	0.0172			50027009	0.0001	0.0006	-0.0016	-0.012	-0.0034	0.0013	-0.0007	-0.0052	0.009	0.0011
		0.1	0.1	0.1	0.1	0.1	0.1	0.1	0.1	0.1	0.1				0.1	0.1	0.1	0.1	0.1	0.1	0.1	0.1	0.1	0.1
raw		SpyCatcher NP control group d42					2x4mer BOAS NP d42						raw		SpyCatcher NP control group d42					2x4mer BOAS NP d42
coating antigen	Dilution Factor	UL	LL	UR	LR	O	UL	LL	UR	LR	O		coating antigen	Dilution Factor	UL	LL	UR	LR	O	UL	LL	UR	LR	O
H4 NB10	50	0.1407	0.1748	0.1831	0.1874	0.1802	0.9433	0.9285	0.939	0.9468	0.9565		B Mal04	50	0.128	0.1569	0.1336	0.1738	0.1559	0.9084	0.8875	0.9059	0.8487	0.8903
	500	0.1192	0.1249	0.1422	0.1504	0.1396	0.8639	0.9	0.8811	0.9176	0.851			500	0.1158	0.1205	0.1161	0.1327	0.1154	0.7448	0.7226	0.6986	0.5058	0.6377
	5001	0.1087	0.1126	0.1179	0.1181	0.1181	0.53	0.6829	0.6181	0.6583	0.5361			5001	0.1054	0.1029	0.0894	0.1063	0.0965	0.3439	0.2985	0.2937	0.1904	0.2434
	50014	0.1122	0.113	0.108	0.1135	0.1125	0.1848	0.2691	0.2219	0.2433	0.186			50014	0.1111	0.1066	0.1068	0.0896	0.0978	0.1344	0.1307	0.128	0.1106	0.1169
	500180	0.1114	0.1126	0.1139	0.1104	0.112	0.1182	0.1286	0.123	0.1286	0.1225			500180	0.1098	0.1072	0.1025	0.104	0.1038	0.105	0.1041	0.1084	0.1073	0.1116
	5002251	0.1158	0.1154	0.113	0.1187	0.1192	0.1184	0.1196	0.1213	0.1227	0.1152			5002251	0.1114	0.1073	0.1085	0.1021	0.0999	0.1052	0.1016	0.1011	0.1052	0.1036
	50027009	0.1139	0.1136	0.1158	0.1122	0.118	0.113	0.115	0.1154	0.1118	0.1118			50027009	0.1079	0.1001	0.1084	0.1021	0.1034	0.1073	0.1053	0.1025	0.1047	0.1018
	0	0.1058	0.1088	0.1105	0.1077	0.1129	0.1102	0.1036	0.1021	0.079	0.0884			0	0.1067	0.1042	0.1055	0.1006	0.1027	0.1016	0.1	0.0992	0.0792	0.0914
Baseline Corrected		SpyCatcher NP control group d42					2x4mer BOAS NP d42								SpyCatcher NP control group d42					2x4mer BOAS NP d42
coating antigen	Dilution Factor	UL	LL	UR	LR	O	UL	LL	UR	LR	O		Baseline Corrected	Dilution Factor	UL	LL	UR	LR	O	UL	LL	UR	LR	O
H4 NB10	50	0.0349	0.066	0.0726	0.0797	0.0673	0.8331	0.8249	0.8369	0.8678	0.8681		coating antigen	50	0.0213	0.0527	0.0281	0.0732	0.0532	0.8068	0.7875	0.8067	0.7695	0.7989
	500	0.0134	0.0161	0.0317	0.0427	0.0267	0.7537	0.7964	0.779	0.8386	0.7626		B Mal04	500	0.0091	0.0163	0.0106	0.0321	0.0127	0.6432	0.6226	0.5994	0.4266	0.5463
	5001	0.0029	0.0038	0.0074	0.0104	0.0052	0.4198	0.5793	0.516	0.5793	0.4477			5001	-0.0013	-0.0013	-0.0161	0.0057	-0.0062	0.2423	0.1985	0.1945	0.1112	0.152
	50014	0.0064	0.0042	-0.0025	0.0058	-0.0004	0.0746	0.1655	0.1198	0.1643	0.0976			50014	0.0044	0.0024	0.0013	-0.011	-0.0049	0.0328	0.0307	0.0288	0.0314	0.0255
	500180	0.0056	0.0038	0.0034	0.0027	-0.0009	0.008	0.025	0.0209	0.0496	0.0341			500180	0.0031	0.003	-0.003	0.0034	0.0011	0.0034	0.0041	0.0092	0.0281	0.0202
	5002251	0.01	0.0066	0.0025	0.011	0.0063	0.0082	0.016	0.0192	0.0437	0.0268			5002251	0.0047	0.0031	0.003	0.0015	-0.0028	0.0036	0.0016	0.0019	0.026	0.0122
	50027009	0.0081	0.0048	0.0053	0.0045	0.0051	0.0028	0.0114	0.0133	0.0328	0.0234			50027009	0.0012	-0.0041	0.0029	0.0015	0.0007	0.0057	0.0053	0.0033	0.0255	0.0104
		0.1	0.1	0.1	0.1	0.1	0.1	0.1	0.1	0.1	0.1				0.1	0.1	0.1	0.1	0.1	0.1	0.1	0.1	0.1	0.1
EPTs
H1 MI-15					H2 JP-57					H3 KS-17					H4 NB-10					H5 VN-04					H7 SH-13					H9 GD-16					B Mal-04
7079.62	8871.27	11257.3	70831.3	33326.2	32260.6	23817	11675.7	12427.2	32383.6	19297.4	3574.12	12035.5	25109.3	38238.1	37949.4	94418	64554.5	107111	57838	28224.5	2397.84	5479.89	33453.9	27920.6	13537.2	2093.96	4113.8	8333.61	8192.48	27555.1	37692.2	29308.3	59038	44592.3	16165.1	11695.8	12065.8	5803.09	8701.54
log EPTs
H1 MI-15					H2 JP-57					H3 KS-17					H4 NB-10					H5 VN-04					H7 SH-13					H9 GD-16					B Mal-04
3.85001	3.94799	4.05143	4.85022	4.52279	4.50867	4.37689	4.06728	4.09437	4.51033	4.2855	3.55317	4.08046	4.39983	4.5825	4.5792	4.97505	4.80993	5.02984	4.76221	4.45063	3.37982	3.73877	4.52445	4.44592	4.13153	3.32097	3.61424	3.92083	3.91342	4.4402	4.57625	4.46699	4.77113	4.64926	4.20858	4.06803	4.08156	3.76366	3.9396
