# Supplementary material for: A modular platform to display multiple hemagglutinin subtypes on a single immunogen
Source: eLife. 2025 Dec 8;13:RP97364. doi: 10.7554/eLife.97364 (PMC12685301; doi:10.7554/eLife.97364)
Supplement: Figure 6—source data 2. [file elife-97364-fig6-data2.xlsx]

## Sheet: Final EPTs
raw	H1 MI-15								H2 JP-57								H3 KS-17								H4 NB-10								H5 VN-04								H7 SH-13								H9 GD-16
3mer	7850.47	20909.6	503869	144977	120066	17806.9	3875.35	7051.09	145675	13450.1	348302	65756.6	29924.4	42663.7	6843.38	16746.1	92704.7	11456.2	387161	624756	40182.6	25172.8	3829.55	22680.6	51304.5	17488.2	54511.9	33267	2958.73	25215.5	1633.12	3050.65	1306.54	8581.97	1821.92	5431.58	297.262	4062.19	419.387	688.339	50	50	1120.19	50	50	1256.65	103.352	251.103	369.743
4mer	37382.6	14447.3	13758	34239.1	530621	9977.39	14108.7	37618.4	69617.2	137629	14163.4	92709.2	628022	3033.52	42055.7	40672.7	102943	829253	128761	32832.3	1.06225e+06	10711.3	199128	28684	513971	2.1274e+07	1.3397e+06	3.43707e+06	50	295594	442361	122060	1404.32	11283.1	713.068	30413.7	4194.37	427.539	6984.01	2139.33	217.765	50	50	241.384	1207.09	400.131	878.05	8187.23	222.35
5mer	44636.3	11129.3	87182.2	20705.7	64373.1	12209.9	49110.5	20359	341961	20390.7	89910	94901.5	40444.9	51023.2	122658	31487.6	120386	55665.6	33410.5	174793	23458.9	49415.7	67094.5	30703.5	425518	559751	444173	1.08897e+06	5.18262e+06	140346	132040	269646	283680	42129	19087.5	89181.6	121732	64915	66899.1	66137.1	50	336.786	716.929	50	274.887	28000.9	3313.79	4456.67	450.313
6mer	28975.8	4450.42	7167.43	24309.2	11310.5	20166.5	14146.8	8648.53	96422.5	57421.6	59807.1	44025.3	47755	37031.1	14225.3	8832.7	237610	53824.4	212917	17986.5	11017.1	23729.7	44231.6	7430.03	324663	526209	336307	188780	265412	40622	102139	42568.8	75271.8	11247.2	68200.7	17218.3	24925.6	28758.9	15155.7	16492.1	20699.5	9206.33	27472.4	7765.59	20206.4	17283.1	6965.15	350.146	242.126
7mer	3953.17	5151.59	675.327	5403.71	4676.41	5048.19	9283.35	6853.11	8499.33	16801.3	8375.38	4283.08	7161	16739	13842.9	12657.4	6974.64	19197.7	20795.9	17621.8	24595.1	3541.31	10967.7	44914	115587	372022	219766	84610.3	102145	58438.6	89948.5	50536.3	50324.8	21473.6	39737.4	14187.7	15648.7	30711.2	22048.7	16600.6	461.555	1027.09	6345.26	440.349	498.119	648.694	2471.98	7943.68	128433
8mer	6664.79	4790.2	7856.64	19175.3	23298.1	2373.73	2260.42	2980.6	15137.1	14648.1	9788.74	18487.6	40061	5223.42	23665.7	12565.4	66383.2	20841	5937.93	30567.8	46960.9	10574.8	187189	35454	235245	400118	196815	351197	210166	46867.5	156560	103837	10030.3	27488.9	10422.1	24096.4	9988.2	2966.79	26751.7	5629.57	2675.21	1.64176e+06	2216.59	9092.66	4216.77	3027.4	4803.91	2766.2	50
Mix	50	5143.27	740.166	1684.11	3805.31				41402.3	2980.72	6983.24	671.209	97022.7				29970.3	9894.25	705.441	2863.41	19294.3				5175.15	14517.9	13861.4	2875.85	9064.95				24822.7	9323.15	22663.9	15664.2	3125.52				50	375.951	21827.3	557.735	2073.97				1.46496e+06
NP	50	50	50	50	50				50	80.4934	50	90.2521	115.2				50	50	50	50	50				50	50	50	50	50				50	50	50	50	50				50	50	50	50	50				50
BOAS NP	7079.62	8871.27	11257.3	70831.3	33326.2				32260.6	23817	11675.7	12427.2	32383.6				19297.4	3574.12	12035.5	25109.3	38238.1				37949.4	94418	64554.5	107111	57838				28224.5	2397.84	5479.89	33453.9	27920.6				13537.2	2093.96	4113.8	8333.61	8192.48				27555.1
log transformed	H1 MI-15								H2 JP-57								H3 KS-17								H4 NB-10								H5 VN-04								H7 SH-13								H9 GD-16
	H1 MI-15:1	H1 MI-15:2	H1 MI-15:3	H1 MI-15:4	H1 MI-15:5	H1 MI-15:6	H1 MI-15:7	H1 MI-15:8	H1 MI-15:1	H1 MI-15:2	H1 MI-15:3	H1 MI-15:4	H1 MI-15:5	H1 MI-15:6	H1 MI-15:7	H1 MI-15:8	H1 MI-15:1	H1 MI-15:2	H1 MI-15:3	H1 MI-15:4	H1 MI-15:5	H1 MI-15:6	H1 MI-15:7	H1 MI-15:8	H1 MI-15:1	H1 MI-15:2	H1 MI-15:3	H1 MI-15:4	H1 MI-15:5	H1 MI-15:6	H1 MI-15:7	H1 MI-15:8	H1 MI-15:1	H1 MI-15:2	H1 MI-15:3	H1 MI-15:4	H1 MI-15:5	H1 MI-15:6	H1 MI-15:7	H1 MI-15:8	H1 MI-15:1	H1 MI-15:2	H1 MI-15:3	H1 MI-15:4	H1 MI-15:5	H1 MI-15:6	H1 MI-15:7	H1 MI-15:8	H1 MI-15:1
3mer	3.8949	4.32035	5.70232	5.1613	5.07942	4.25059	3.58831	3.84826	5.16339	4.12873	5.54196	4.81794	4.47602	4.63006	3.83527	4.22391	4.9671	4.05904	5.58789	5.79571	4.60404	4.40093	3.58315	4.35565	4.71016	4.24274	4.73649	4.52201	3.47111	4.40167	3.21302	3.48439	3.11612	3.93359	3.26053	3.73493	2.47314	3.60876	2.62262	2.8378	1.69897	1.69897	3.04929	1.69897	1.69897	3.09921	2.01432	2.39985	2.5679
4mer	4.57267	4.15979	4.13855	4.53452	5.72478	3.99902	4.14949	4.5754	4.84272	5.13871	4.15117	4.96712	5.79797	3.48195	4.62383	4.6093	5.0126	5.91869	5.10979	4.5163	6.02622	4.02984	5.29913	4.45764	5.71094	7.32785	6.12701	6.53619	1.69897	5.4707	5.64578	5.08657	3.14747	4.05243	2.85313	4.48307	3.62267	2.63098	3.8441	3.33028	2.33799	1.69897	1.69897	2.38271	3.08174	2.6022	2.94352	3.91314	2.34704
5mer	4.64969	4.04647	4.94043	4.31609	4.8087	4.08671	4.69117	4.30876	5.53398	4.30943	4.95381	4.97727	4.60686	4.70777	5.0887	4.49814	5.08058	4.74559	4.52388	5.24252	4.37031	4.69387	4.82669	4.48719	5.62892	5.74799	5.64755	6.03702	6.71455	5.1472	5.12071	5.43079	5.45283	4.62458	4.28075	4.95028	5.0854	4.81235	4.82542	4.82044	1.69897	2.52735	2.85548	1.69897	2.43915	4.44717	3.52032	3.64901	2.65351
6mer	4.46204	3.6484	3.85536	4.38577	4.05348	4.30463	4.15066	3.93694	4.98418	4.75908	4.77675	4.6437	4.67902	4.56857	4.15306	3.94609	5.37586	4.73098	5.32821	4.25495	4.04207	4.37529	4.64573	3.87099	5.51143	5.72116	5.52674	5.27596	5.42392	4.60876	5.00919	4.62909	4.87663	4.05104	4.83379	4.23599	4.39664	4.45877	4.18058	4.21728	4.31596	3.96409	4.4389	3.89017	4.30549	4.23762	3.84293	2.54425	2.38404
7mer	3.59695	3.71194	2.82951	3.73269	3.66991	3.70314	3.9677	3.83589	3.92938	4.22534	3.923	3.63176	3.85497	4.22373	4.14123	4.10235	3.84352	4.28325	4.31798	4.24605	4.39085	3.54916	4.04012	4.65238	5.06291	5.57057	5.34196	4.92742	5.00922	4.7667	4.95399	4.7036	4.70178	4.33191	4.5992	4.15191	4.19448	4.4873	4.34338	4.22012	2.66422	3.01161	3.80245	2.6438	2.69733	2.81204	3.39305	3.90002	5.10868
8mer	3.82379	3.68035	3.89524	4.28274	4.36732	3.37543	3.35419	3.4743	4.18004	4.16578	3.99073	4.26688	4.60272	3.71795	4.37412	4.09918	4.82206	4.31892	3.77364	4.48526	4.67174	4.02427	5.27228	4.54966	5.37152	5.60219	5.29406	5.54555	5.32256	4.67087	5.19468	5.01635	4.00132	4.43916	4.01795	4.38195	3.99949	3.47229	4.42735	3.75048	3.42736	6.21531	3.34568	3.95869	3.62498	3.48107	3.68159	3.44188	1.69897
Mix	1.69897	3.71124	2.86933	3.22637	3.58039				4.61702	3.47432	3.84406	2.82686	4.98687				4.47669	3.99538	2.84846	3.45688	4.28543				3.71392	4.1619	4.14181	3.45877	3.95737				4.39485	3.96956	4.35534	4.19491	3.49492				1.69897	2.57513	4.339	2.74643	3.3168				6.16582
NP	1.69897	1.69897	1.69897	1.69897	1.69897				1.69897	1.90576	1.69897	1.95546	2.06145				1.69897	1.69897	1.69897	1.69897	1.69897				1.69897	1.69897	1.69897	1.69897	1.69897				1.69897	1.69897	1.69897	1.69897	1.69897				1.69897	1.69897	1.69897	1.69897	1.69897				1.69897
BOAS NP	3.85001	3.94799	4.05143	4.85022	4.52279				4.50867	4.37689	4.06728	4.09437	4.51033				4.2855	3.55317	4.08046	4.39983	4.5825				4.5792	4.97505	4.80993	5.02984	4.76221				4.45063	3.37982	3.73877	4.52445	4.44592				4.13153	3.32097	3.61424	3.92083	3.91342				4.4402
[truncated: 31 more columns]

## Sheet: H1 titers
		Individual Mice from each cohort (
H1 titers (all) (d42)	Cohort	3mer	3mer	3mer	3mer	3mer	3mer	3mer	3mer	4mer	4mer	4mer	4mer	4mer	4mer	4mer	4mer	5mer	5mer	5mer	5mer	5mer	5mer	5mer	5mer	6mer	6mer	6mer	6mer	6mer	6mer	6mer	6mer	7mer	7mer	7mer	7mer	7mer	7mer	7mer	7mer	8mer	8mer	8mer	8mer	8mer	8mer	8mer	8mer
	Individual Mouse	UL	LL	UR	LR	O	377 = 054	378	379	UL	LL	UR	LR	O	380	381	382	UL	LL	UR	LR	O	383	384 = 053	385 = 052	UL	LL	UR	LR	O	386	387	388	UL	LL	UR	LR	O	389	390 = 055	391 = 056	UL	LL	UR	LR	O	392	393	394
	Dilution Factor
	50	0.7852	0.7692	0.8556	0.8702	0.9259	0.9888	0.9668	0.9422	0.8829	0.7689	0.8536	0.8938	0.894	0.9461	0.9919	1.0271	0.8303	0.781	0.8458	0.8245	0.8309	1.1255	1.0642	1.053	0.8099	0.7526	0.7966	0.7986	0.829	1.0465	0.9877	0.9906	0.2079	0.4368	0.5738	0.7914	0.758	0.9478	0.9841	0.9628	0.7897	0.8219	0.8546	0.889	0.8846	0.8702	0.7952	0.938
	500	0.4801	0.5726	0.7399	0.7305	0.7592	0.8073	0.5109	0.6183	0.6503	0.5317	0.5561	0.6695	0.8082	0.7051	0.7495	0.8934	0.7324	0.5886	0.7676	0.7026	0.791	0.7052	0.9303	0.87	0.677	0.4444	0.5508	0.6331	0.6062	0.8666	0.8122	0.7364	0.2313	0.4774	0.1848	0.5132	0.4536	0.6063	0.735	0.6657	0.5215	0.3211	0.5332	0.721	0.6869	0.4085	0.3739	0.4598
	5001	0.1932	0.2783	0.5439	0.4414	0.4577	0.3334	0.1404	0.1946	0.3242	0.2387	0.2421	0.3357	0.5698	0.2438	0.2837	0.4734	0.3976	0.2321	0.4474	0.3169	0.4491	0.2546	0.533	0.383	0.32	0.1527	0.1904	0.2974	0.2374	0.3637	0.2981	0.2235	0.0995	0.1753	0.0834	0.1643	0.1554	0.1653	0.2409	0.1925	0.1808	0.1759	0.1959	0.3472	0.2991	0.1088	0.1102	0.1232
	50014	0.1083	0.1376	0.2951	0.2226	0.2153	0.1145	0.0728	0.0764	0.1539	0.1229	0.1448	0.1414	0.3192	0.0868	0.0938	0.1336	0.1674	0.1081	0.214	0.1299	0.1984	0.0846	0.1512	0.107	0.1571	0.0871	0.0982	0.14	0.1086	0.1016	0.1084	0.0826	0.0718	0.0911	0.0674	0.0912	0.0784	0.0725	0.0833	0.0751	0.0836	0.0983	0.0942	0.1389	0.1458	0.0696	0.066	0.066
	500180	0.0767	0.0909	0.1592	0.1311	0.1296	0.0651	0.0598	0.0629	0.106	0.0928	0.0836	0.0912	0.196	0.0637	0.0646	0.0698	0.0985	0.0757	0.1094	0.085	0.1181	0.0646	0.0716	0.0659	0.0859	0.0723	0.072	0.094	0.0805	0.0654	0.0618	0.0612	0.0635	0.0697	0.0626	0.0683	0.0648	0.06	0.0619	0.0632	0.0688	0.0721	0.072	0.0813	0.0998	0.0606	0.0688	0.0609
	5002251	0.0746	0.092	0.136	0.1043	0.1065	0.0801	0.0588	0.0611	0.0841	0.0783	0.0764	0.0838	0.1135	0.0593	0.0632	0.0606	0.0806	0.0842	0.0821	0.0694	0.0892	0.0604	0.0615	0.0636	0.0732	0.0657	0.0628	0.0732	0.0691	0.061	0.0595	0.0588	0.0623	0.0652	0.0645	0.0642	0.0597	0.0636	0.0597	0.0599	0.0614	0.0607	0.0708	0.07	0.0757	0.0593	0.0597	0.059
	50027009	0.083	0.0754	0.0946	0.09	0.1176	0.0605	0.0603	0.0608	0.075	0.0686	0.0755	0.0705	0.0983	0.0607	0.0602	0.0612	0.0773	0.065	0.0747	0.0688	0.0792	0.0617	0.0614	0.0628	0.0659	0.0641	0.0662	0.0707	0.0684	0.0602	0.0598	0.061	0.066	0.0611	0.0646	0.0658	0.0616	0.0606	0.0599	0.0623	0.0598	0.0622	0.0634	0.0638	0.0674	0.066	0.059	0.062
2ndary only control (for blank subtraction)		0.0654	0.07	0.0664	0.0638	0.0724	0.0682	0.0614	0.0612	0.0652	0.0665	0.0792	0.0633	0.0751	0.0652	0.0615	0.061	0.0642	0.0626	0.0638	0.0616	0.0646	0.0617	0.0624	0.073	0.0614	0.0631	0.0633	0.0627	0.0658	0.061	0.0615	0.0601	0.064	0.0609	0.0603	0.0611	0.0611	0.0645	0.0668	0.0597	0.0585	0.0607	0.0621	0.0936	0.0639	0.0589	0.0604	0.061
Background subtracted	Cohort	3mer	3mer	3mer	3mer	3mer	3mer	3mer	3mer	4mer	4mer	4mer	4mer	4mer	4mer	4mer	4mer	5mer	5mer	5mer	5mer	5mer	5mer	5mer	5mer	6mer	6mer	6mer	6mer	6mer	6mer	6mer	6mer	7mer	7mer	7mer	7mer	7mer	7mer	7mer	7mer	8mer	8mer	8mer	8mer	8mer	8mer	8mer	8mer
	Individual Mouse	UL	LL	UR	LR	O	377 = 054	378	379	UL	LL	UR	LR	O	380	381	382	UL	LL	UR	LR	O	383	384 = 053	385 = 052	UL	LL	UR	LR	O	386	387	388	UL	LL	UR	LR	O	389	390 = 055	391 = 056	UL	LL	UR	LR	O	392	393	394
	Dilution Factor
	50	0.7198	0.6992	0.7892	0.8064	0.8535	0.9206	0.9054	0.881	0.8177	0.7024	0.7744	0.8305	0.8189	0.8809	0.9304	0.9661	0.7661	0.7184	0.782	0.7629	0.7663	1.0638	1.0018	0.98	0.7485	0.6895	0.7333	0.7359	0.7632	0.9855	0.9262	0.9305	0.1439	0.3759	0.5135	0.7303	0.6969	0.8833	0.9173	0.9031	0.7312	0.7612	0.7925	0.7954	0.8207	0.8113	0.7348	0.877
	500	0.4147	0.5026	0.6735	0.6667	0.6868	0.7391	0.4495	0.5571	0.5851	0.4652	0.4769	0.6062	0.7331	0.6399	0.688	0.8324	0.6682	0.526	0.7038	0.641	0.7264	0.6435	0.8679	0.797	0.6156	0.3813	0.4875	0.5704	0.5404	0.8056	0.7507	0.6763	0.1673	0.4165	0.1245	0.4521	0.3925	0.5418	0.6682	0.606	0.463	0.2604	0.4711	0.6274	0.623	0.3496	0.3135	0.3988
	5001	0.1278	0.2083	0.4775	0.3776	0.3853	0.2652	0.079	0.1334	0.259	0.1722	0.1629	0.2724	0.4947	0.1786	0.2222	0.4124	0.3334	0.1695	0.3836	0.2553	0.3845	0.1929	0.4706	0.31	0.2586	0.0896	0.1271	0.2347	0.1716	0.3027	0.2366	0.1634	0.0355	0.1144	0.0231	0.1032	0.0943	0.1008	0.1741	0.1328	0.1223	0.1152	0.1338	0.2536	0.2352	0.0499	0.0498	0.0622
	50014	0.0429	0.0676	0.2287	0.1588	0.1429	0.0463	0.0114	0.0152	0.0887	0.0564	0.0656	0.0781	0.2441	0.0216	0.0323	0.0726	0.1032	0.0455	0.1502	0.0683	0.1338	0.0229	0.0888	0.034	0.0957	0.024	0.0349	0.0773	0.0428	0.0406	0.0469	0.0225	0.0078	0.0302	0.0071	0.0301	0.0173	0.008	0.0165	0.0154	0.0251	0.0376	0.0321	0.0453	0.0819	0.0107	0.0056	0.005
	500180	0.0113	0.0209	0.0928	0.0673	0.0572	-0.0031	-0.0016	0.0017	0.0408	0.0263	0.0044	0.0279	0.1209	-0.0015	0.0031	0.0088	0.0343	0.0131	0.0456	0.0234	0.0535	0.0029	0.0092	-0.0071	0.0245	0.0092	0.0087	0.0313	0.0147	0.0044	0.0003	0.0011	-0.0005	0.0088	0.0023	0.0072	0.0037	-0.0045	-0.0049	0.0035	0.0103	0.0114	0.0099	-0.0123	0.0359	0.0017	0.0084	-0.0001
	5002251	0.0092	0.022	0.0696	0.0405	0.0341	0.0119	-0.0026	-0.0001	0.0189	0.0118	-0.0028	0.0205	0.0384	-0.0059	0.0017	-0.0004	0.0164	0.0216	0.0183	0.0078	0.0246	-0.0013	-0.0009	-0.0094	0.0118	0.0026	-0.0005	0.0105	0.0033	0	-0.002	-0.0013	-0.0017	0.0043	0.0042	0.0031	-0.0014	-0.0009	-0.0071	0.0002	0.0029	0	0.0087	-0.0236	0.0118	0.0004	-0.0007	-0.002
	50027009	0.0176	0.0054	0.0282	0.0262	0.0452	-0.0077	-0.0011	-0.0004	0.0098	0.0021	-0.0037	0.0072	0.0232	-0.0045	-0.0013	0.0002	0.0131	0.0024	0.0109	0.0072	0.0146	0	-0.001	-0.0102	0.0045	0.001	0.0029	0.008	0.0026	-0.0008	-0.0017	0.0009	0.002	0.0002	0.0043	0.0047	0.0005	-0.0039	-0.0069	0.0026	0.0013	0.0015	0.0013	-0.0298	0.0035	0.0071	-0.0014	0.001
Chose y = 0.1 as intersection point for interpolation of Sigmoid		0.1	0.1	0.1	0.1	0.1	0.1	0.1	0.1	0.1	0.1	0.1	0.1	0.1	0.1	0.1	0.1	0.1	0.1	0.1	0.1	0.1	0.1	0.1	0.1	0.1	0.1	0.1	0.1	0.1	0.1	0.1	0.1	0.1	0.1	0.1	0.1	0.1	0.1	0.1	0.1	0.1	0.1	0.1	0.1	0.1	0.1	0.1	0.1
Interpolation (for titers)	Cohort	3mer	3mer	3mer	3mer	3mer	3mer	3mer	3mer	4mer	4mer	4mer	4mer	4mer	4mer	4mer	4mer	5mer	5mer	5mer	5mer	5mer	5mer	5mer	5mer	6mer	6mer	6mer	6mer	6mer	6mer	6mer	6mer	7mer	7mer	7mer	7mer	7mer	7mer	7mer	7mer	8mer	8mer	8mer	8mer	8mer	8mer	8mer	8mer
	Individual Mouse	UL	LL	UR	LR	O	377 = 054	378	379	UL	LL	UR	LR	O	380	381	382	UL	LL	UR	LR	O	383	384 = 053	385 = 052	UL	LL	UR	LR	O	386	387	388	UL	LL	UR	LR	O	389	390 = 055	391 = 056	UL	LL	UR	LR	O	392	393	394
		7850.47	20909.6	503869	144977	120066	17806.9	3875.35	7051.09	37382.6	14447.3	13758	34239.1	530621	9977.39	14108.7	37618.4	44636.3	11129.3	87182.2	20705.7	64373.1	12209.9	49110.5	20359	28975.8	4450.42	7167.43	24309.2	11310.5	20166.5	14146.8	8648.53	3953.17	5151.59	675.327	5403.71	4676.41	5048.19	9283.35	6853.11	6664.79	4790.2	7856.64	19175.3	23298.1	2373.73	2260.42	2980.6
Log transform of titers	Cohort	3mer	3mer	3mer	3mer	3mer	3mer	3mer	3mer	4mer	4mer	4mer	4mer	4mer	4mer	4mer	4mer	5mer	5mer	5mer	5mer	5mer	5mer	5mer	5mer	6mer	6mer	6mer	6mer	6mer	6mer	6mer	6mer	7mer	7mer	7mer	7mer	7mer	7mer	7mer	7mer	8mer	8mer	8mer	8mer	8mer	8mer	8mer	8mer
	Individual Mouse	UL	LL	UR	LR	O	377 = 054	378	379	UL	LL	UR	LR	O	380	381	382	UL	LL	UR	LR	O	383	384 = 053	385 = 052	UL	LL	UR	LR	O	386	387	388	UL	LL	UR	LR	O	389	390 = 055	391 = 056	UL	LL	UR	LR	O	392	393	394
		3.8949	4.32035	5.70232	5.1613	5.07942	4.25059	3.58831	3.84826	4.57267	4.15979	4.13855	4.53452	5.72478	3.99902	4.14949	4.5754	4.64969	4.04647	4.94043	4.31609	4.8087	4.08671	4.69117	4.30876	4.46204	3.6484	3.85536	4.38577	4.05348	4.30463	4.15066	3.93694	3.59695	3.71194	2.82951	3.73269	3.66991	3.70314	3.9677	3.83589	3.82379	3.68035	3.89524	4.28274	4.36732	3.37543	3.35419	3.4743
[truncated: 15 more columns]

## Sheet: H2 titers
		Individual Mice from each cohort (
H2 titers (all) (d42)	Cohort	3mer	3mer	3mer	3mer	3mer	3mer	3mer	3mer	4mer	4mer	4mer	4mer	4mer	4mer	4mer	4mer	5mer	5mer	5mer	5mer	5mer	5mer	5mer	5mer	6mer	6mer	6mer	6mer	6mer	6mer	6mer	6mer	7mer	7mer	7mer	7mer	7mer	7mer	7mer	7mer	8mer	8mer	8mer	8mer	8mer	8mer	8mer	8mer
	Individual Mouse	UL	LL	UR	LR	O	377 = 054	378	379	UL	LL	UR	LR	O	380	381	382	UL	LL	UR	LR	O	383	384 = 053	385 = 052	UL	LL	UR	LR	O	386	387	388	UL	LL	UR	LR	O	389	390 = 055	391 = 056	UL	LL	UR	LR	O	392	393	394
	Dilution Factor
	50	0.807	0.6443	0.8788	0.8037	0.8025	1.0315	0.984	1.0211	0.7782	0.8164	0.7203	0.7996	0.8134	0.9179	1.0176	1.0232	0.8158	0.7537	0.7939	0.7445	0.6745	1.0111	1.0487	1.0529	0.8378	0.8003	0.8099	0.8025	0.8147	1.0027	0.9861	0.9355	0.7303	0.7024	0.6658	0.6092	0.6888	0.9593	0.9405	0.9564	0.6866	0.7468	0.7307	0.8438	0.8558	0.8885	0.9564	0.9938
	500	0.6957	0.5033	0.7602	0.6608	0.6619	0.9062	0.643	0.807	0.6282	0.7179	0.5573	0.6814	0.7493	0.4585	0.8905	0.9139	0.7587	0.599	0.7396	0.679	0.5672	0.8819	0.9772	0.9212	0.7503	0.7281	0.7089	0.6853	0.7072	0.8824	0.7886	0.6819	0.4923	0.5792	0.4933	0.3752	0.4671	0.795	0.7261	0.6981	0.5414	0.5554	0.5303	0.6101	0.6831	0.547	0.7601	0.7471
	5001	0.4604	0.2418	0.5431	0.3884	0.3362	0.501	0.1953	0.3233	0.3755	0.4693	0.2531	0.4145	0.5422	0.1313	0.4914	0.5088	0.5756	0.2915	0.4571	0.4732	0.3385	0.5244	0.7275	0.4622	0.4979	0.4216	0.4371	0.3954	0.4122	0.4779	0.3162	0.23	0.2033	0.2664	0.1986	0.1485	0.1849	0.3328	0.2883	0.2702	0.2516	0.248	0.2161	0.275	0.3615	0.168	0.3585	0.2746
	50014	0.2157	0.1031	0.2644	0.1693	0.1381	0.1551	0.0843	0.1017	0.1763	0.2029	0.1116	0.1908	0.2832	0.0754	0.1487	0.1527	0.288	0.1144	0.2068	0.2045	0.1508	0.1582	0.2663	0.1328	0.1981	0.1801	0.1647	0.1506	0.152	0.1404	0.098	0.0832	0.0903	0.1258	0.0961	0.082	0.0918	0.0965	0.0924	0.0888	0.1117	0.1062	0.0965	0.1144	0.1531	0.0762	0.1152	0.0922
	500180	0.137	0.081	0.1422	0.1085	0.0882	0.0778	0.0663	0.0703	0.1113	0.1479	0.089	0.1232	0.2024	0.0678	0.0762	0.0783	0.1589	0.0848	0.1159	0.1172	0.1042	0.076	0.0934	0.0741	0.1253	0.1124	0.1065	0.0996	0.1141	0.0759	0.069	0.0662	0.0717	0.0785	0.0722	0.0642	0.0677	0.0694	0.0669	0.0687	0.0763	0.0749	0.0724	0.0736	0.0872	0.0652	0.0707	0.069
	5002251	0.0952	0.0749	0.1358	0.092	0.0781	0.0685	0.0676	0.0674	0.0875	0.1121	0.0812	0.108	0.1217	0.0668	0.0681	0.0676	0.11	0.0722	0.0881	0.0881	0.0859	0.0665	0.0696	0.0675	0.0895	0.0823	0.0797	0.0754	0.0861	0.0674	0.0673	0.0648	0.0635	0.1202	0.0628	0.0616	0.0644	0.0631	0.0644	0.0663	0.0718	0.0675	0.0661	0.0671	0.0719	0.0652	0.0643	0.0654
	50027009	0.1192	0.066	0.0969	0.0795	0.0667	0.0688	0.0668	0.0678	0.0728	0.0889	0.0761	0.0872	0.1039	0.0668	0.0698	0.067	0.091	0.0657	0.076	0.0762	0.074	0.068	0.0663	0.0671	0.0771	0.0713	0.0677	0.0683	0.0707	0.0675	0.0662	0.0639	0.0635	0.0649	0.0602	0.059	0.0604	0.0656	0.0637	0.0653	0.0626	0.0604	0.0609	0.0614	0.0668	0.0656	0.0655	0.0663
2ndary only control (for blank subtraction)		0.0657	0.0617	0.0611	0.061	0.0619	0.0705	0.0653	0.0667	0.0641	0.0616	0.0651	0.0627	0.0632	0.0678	0.067	0.0712	0.0622	0.061	0.0621	0.0668	0.0662	0.067	0.0681	0.0684	0.0641	0.0647	0.0621	0.0646	0.0643	0.0678	0.0758	0.067	0.0625	0.0618	0.0604	0.0598	0.0607	0.0659	0.0663	0.0662	0.0601	0.0589	0.0616	0.0606	0.0637	0.0639	0.0678	0.0657
Background subtracted	Cohort	3mer	3mer	3mer	3mer	3mer	3mer	3mer	3mer	4mer	4mer	4mer	4mer	4mer	4mer	4mer	4mer	5mer	5mer	5mer	5mer	5mer	5mer	5mer	5mer	6mer	6mer	6mer	6mer	6mer	6mer	6mer	6mer	7mer	7mer	7mer	7mer	7mer	7mer	7mer	7mer	8mer	8mer	8mer	8mer	8mer	8mer	8mer	8mer
	Individual Mouse	UL	LL	UR	LR	O	377 = 054	378	379	UL	LL	UR	LR	O	380	381	382	UL	LL	UR	LR	O	383	384 = 053	385 = 052	UL	LL	UR	LR	O	386	387	388	UL	LL	UR	LR	O	389	390 = 055	391 = 056	UL	LL	UR	LR	O	392	393	394
	Dilution Factor
	50	0.7413	0.5826	0.8177	0.7427	0.7406	0.961	0.9187	0.9544	0.7141	0.7548	0.6552	0.7369	0.7502	0.8501	0.9506	0.952	0.7536	0.6927	0.7318	0.6777	0.6083	0.9441	0.9806	0.9845	0.7737	0.7356	0.7478	0.7379	0.7504	0.9349	0.9103	0.8685	0.6678	0.6406	0.6054	0.5494	0.6281	0.8934	0.8742	0.8902	0.6265	0.6879	0.6691	0.7832	0.7921	0.8246	0.8886	0.9281
	500	0.63	0.4416	0.6991	0.5998	0.6	0.8357	0.5777	0.7403	0.5641	0.6563	0.4922	0.6187	0.6861	0.3907	0.8235	0.8427	0.6965	0.538	0.6775	0.6122	0.501	0.8149	0.9091	0.8528	0.6862	0.6634	0.6468	0.6207	0.6429	0.8146	0.7128	0.6149	0.4298	0.5174	0.4329	0.3154	0.4064	0.7291	0.6598	0.6319	0.4813	0.4965	0.4687	0.5495	0.6194	0.4831	0.6923	0.6814
	5001	0.3947	0.1801	0.482	0.3274	0.2743	0.4305	0.13	0.2566	0.3114	0.4077	0.188	0.3518	0.479	0.0635	0.4244	0.4376	0.5134	0.2305	0.395	0.4064	0.2723	0.4574	0.6594	0.3938	0.4338	0.3569	0.375	0.3308	0.3479	0.4101	0.2404	0.163	0.1408	0.2046	0.1382	0.0887	0.1242	0.2669	0.222	0.204	0.1915	0.1891	0.1545	0.2144	0.2978	0.1041	0.2907	0.2089
	50014	0.15	0.0414	0.2033	0.1083	0.0762	0.0846	0.019	0.035	0.1122	0.1413	0.0465	0.1281	0.22	0.0076	0.0817	0.0815	0.2258	0.0534	0.1447	0.1377	0.0846	0.0912	0.1982	0.0644	0.134	0.1154	0.1026	0.086	0.0877	0.0726	0.0222	0.0162	0.0278	0.064	0.0357	0.0222	0.0311	0.0306	0.0261	0.0226	0.0516	0.0473	0.0349	0.0538	0.0894	0.0123	0.0474	0.0265
	500180	0.0713	0.0193	0.0811	0.0475	0.0263	0.0073	0.001	0.0036	0.0472	0.0863	0.0239	0.0605	0.1392	0	0.0092	0.0071	0.0967	0.0238	0.0538	0.0504	0.038	0.009	0.0253	0.0057	0.0612	0.0477	0.0444	0.035	0.0498	0.0081	-0.0068	-0.0008	0.0092	0.0167	0.0118	0.0044	0.007	0.0035	0.0006	0.0025	0.0162	0.016	0.0108	0.013	0.0235	0.0013	0.0029	0.0033
	5002251	0.0295	0.0132	0.0747	0.031	0.0162	-0.002	0.0023	0.0007	0.0234	0.0505	0.0161	0.0453	0.0585	-0.001	0.0011	-0.0036	0.0478	0.0112	0.026	0.0213	0.0197	-0.0005	0.0015	-0.0009	0.0254	0.0176	0.0176	0.0108	0.0218	-0.0004	-0.0085	-0.0022	0.001	0.0584	0.0024	0.0018	0.0037	-0.0028	-0.0019	0.0001	0.0117	0.0086	0.0045	0.0065	0.0082	0.0013	-0.0035	-0.0003
	50027009	0.0535	0.0043	0.0358	0.0185	0.0048	-0.0017	0.0015	0.0011	0.0087	0.0273	0.011	0.0245	0.0407	-0.001	0.0028	-0.0042	0.0288	0.0047	0.0139	0.0094	0.0078	0.001	-0.0018	-0.0013	0.013	0.0066	0.0056	0.0037	0.0064	-0.0003	-0.0096	-0.0031	0.001	0.0031	-0.0002	-0.0008	-0.0003	-0.0003	-0.0026	-0.0009	0.0025	0.0015	-0.0007	0.0008	0.0031	0.0017	-0.0023	0.0006
Chose y = 0.1 as intersection point for interpolation of Sigmoid		0.1	0.1	0.1	0.1	0.1	0.1	0.1	0.1	0.1	0.1	0.1	0.1	0.1	0.1	0.1	0.1	0.1	0.1	0.1	0.1	0.1	0.1	0.1	0.1	0.1	0.1	0.1	0.1	0.1	0.1	0.1	0.1	0.1	0.1	0.1	0.1	0.1	0.1	0.1	0.1	0.1	0.1	0.1	0.1	0.1	0.1	0.1	0.1
Interpolation (for titers)	Cohort	3mer	3mer	3mer	3mer	3mer	3mer	3mer	3mer	4mer	4mer	4mer	4mer	4mer	4mer	4mer	4mer	5mer	5mer	5mer	5mer	5mer	5mer	5mer	5mer	6mer	6mer	6mer	6mer	6mer	6mer	6mer	6mer	7mer	7mer	7mer	7mer	7mer	7mer	7mer	7mer	8mer	8mer	8mer	8mer	8mer	8mer	8mer	8mer
	Individual Mouse	UL	LL	UR	LR	O	377 = 054	378	379	UL	LL	UR	LR	O	380	381	382	UL	LL	UR	LR	O	383	384 = 053	385 = 052	UL	LL	UR	LR	O	386	387	388	UL	LL	UR	LR	O	389	390 = 055	391 = 056	UL	LL	UR	LR	O	392	393	394
		145675	13450.1	348302	65756.6	29924.4	42663.7	6843.38	16746.1	69617.2	137629	14163.4	92709.2	628022	3033.52	42055.7	40672.7	341961	20390.7	89910	94901.5	40444.9	51023.2	122658	31487.6	96422.5	57421.6	59807.1	44025.3	47755	37031.1	14225.3	8832.7	8499.33	16801.3	8375.38	4283.08	7161	16739	13842.9	12657.4	15137.1	14648.1	9788.74	18487.6	40061	5223.42	23665.7	12565.4
Log transform of titers	Cohort	3mer	3mer	3mer	3mer	3mer	3mer	3mer	3mer	4mer	4mer	4mer	4mer	4mer	4mer	4mer	4mer	5mer	5mer	5mer	5mer	5mer	5mer	5mer	5mer	6mer	6mer	6mer	6mer	6mer	6mer	6mer	6mer	7mer	7mer	7mer	7mer	7mer	7mer	7mer	7mer	8mer	8mer	8mer	8mer	8mer	8mer	8mer	8mer
	Individual Mouse	UL	LL	UR	LR	O	377 = 054	378	379	UL	LL	UR	LR	O	380	381	382	UL	LL	UR	LR	O	383	384 = 053	385 = 052	UL	LL	UR	LR	O	386	387	388	UL	LL	UR	LR	O	389	390 = 055	391 = 056	UL	LL	UR	LR	O	392	393	394
		5.16339	4.12873	5.54196	4.81794	4.47602	4.63006	3.83527	4.22391	4.84272	5.13871	4.15117	4.96712	5.79797	3.48195	4.62383	4.6093	5.53398	4.30943	4.95381	4.97727	4.60686	4.70777	5.0887	4.49814	4.98418	4.75908	4.77675	4.6437	4.67902	4.56857	4.15306	3.94609	3.92938	4.22534	3.923	3.63176	3.85497	4.22373	4.14123	4.10235	4.18004	4.16578	3.99073	4.26688	4.60272	3.71795	4.37412	4.09918
[truncated: 15 more columns]

## Sheet: H3 titers
		Individual Mice from each cohort (
H3 titers (all) (d42)	Cohort	3mer	3mer	3mer	3mer	3mer	3mer	3mer	3mer	4mer	4mer	4mer	4mer	4mer	4mer	4mer	4mer	5mer	5mer	5mer	5mer	5mer	5mer	5mer	5mer	6mer	6mer	6mer	6mer	6mer	6mer	6mer	6mer	7mer	7mer	7mer	7mer	7mer	7mer	7mer	7mer	8mer	8mer	8mer	8mer	8mer	8mer	8mer	8mer
	Individual Mouse	UL	LL	UR	LR	O	377 = 054	378	379	UL	LL	UR	LR	O	380	381	382	UL	LL	UR	LR	O	383	384 = 053	385 = 052	UL	LL	UR	LR	O	386	387	388	UL	LL	UR	LR	O	389	390 = 055	391 = 056	UL	LL	UR	LR	O	392	393	394
	Dilution Factor
	50	0.8868	0.7413	0.9041	0.8653	0.8331	1.0308	0.9311	1.028	0.7811	0.8409	0.8551	0.8922	0.8714	0.9309	1.0659	1.0228	0.9468	0.8398	0.8395	0.8996	0.7956	1.0116	1.0225	1.0586	0.9371	0.8867	0.9186	0.8554	0.8436	1.0314	0.9928	0.9349	0.8219	0.8371	0.8419	0.8336	0.8466	0.899	0.918	0.9858	0.8664	0.8353	0.7869	0.8777	0.8672	0.8966	0.9628	0.9744
	500	0.7423	0.5146	0.8255	0.817	0.6925	0.8637	0.5258	0.8336	0.6742	0.7409	0.7279	0.7065	0.78	0.6795	0.9704	0.8484	0.8202	0.8091	0.7495	0.7758	0.5919	0.8838	0.9338	0.8875	0.8997	0.7584	0.8536	0.6398	0.5838	0.8053	0.8379	0.6315	0.546	0.6848	0.6794	0.6416	0.7217	0.5005	0.6906	0.8341	0.7444	0.6534	0.5018	0.7312	0.7296	0.6771	0.9073	0.8203
	5001	0.4426	0.2286	0.6136	0.6209	0.3636	0.3867	0.1506	0.3646	0.4361	0.569	0.4613	0.3524	0.6089	0.2464	0.7589	0.4021	0.5187	0.4622	0.3798	0.5436	0.2881	0.5113	0.5927	0.4275	0.6112	0.432	0.5724	0.2894	0.2359	0.3585	0.4804	0.2036	0.2014	0.3262	0.3193	0.2921	0.3591	0.1397	0.247	0.4828	0.4469	0.3075	0.1834	0.3803	0.4145	0.2432	0.7313	0.4246
	50014	0.2056	0.1059	0.3298	0.3529	0.1649	0.1251	0.0751	0.1097	0.2111	0.3228	0.2147	0.1438	0.3752	0.0877	0.3146	0.119	0.2426	0.2137	0.1661	0.2563	0.1387	0.1517	0.1913	0.1208	0.3039	0.1791	0.2828	0.1171	0.0996	0.1066	0.1315	0.0801	0.0868	0.1234	0.1362	0.1215	0.1415	0.0703	0.0873	0.1341	0.1898	0.1309	0.0915	0.1442	0.172	0.0823	0.3077	0.1235
	500180	0.1224	0.0802	0.1464	0.1785	0.0942	0.0735	0.0634	0.0696	0.1136	0.2137	0.1421	0.0913	0.2135	0.0673	0.0978	0.0698	0.1137	0.1085	0.0891	0.1263	0.089	0.0752	0.078	0.0703	0.1596	0.0941	0.1579	0.0804	0.0746	0.0705	0.0712	0.0635	0.078	0.0818	0.0839	0.0817	0.0852	0.0634	0.0666	0.0691	0.1199	0.0994	0.0729	0.085	0.1004	0.0658	0.1004	0.0702
	5002251	0.1021	0.0748	0.1257	0.1296	0.0778	0.0668	0.0648	0.063	0.0849	0.131	0.095	0.0777	0.1172	0.0633	0.0669	0.0646	0.0816	0.0826	0.077	0.0862	0.0751	0.0649	0.0663	0.066	0.1044	0.0772	0.0989	0.0713	0.0663	0.0626	0.0638	0.0613	0.072	0.0718	0.0739	0.0709	0.0725	0.0623	0.0632	0.0643	0.0851	0.0755	0.0728	0.0796	0.0779	0.0598	0.0658	0.0629
	50027009	0.1092	0.0659	0.0935	0.1063	0.0704	0.0668	0.0642	0.0642	0.0739	0.113	0.0965	0.0865	0.1067	0.0641	0.0646	0.065	0.0737	0.0801	0.0733	0.0742	0.0704	0.0656	0.064	0.0646	0.0847	0.071	0.0793	0.0687	0.0673	0.0708	0.0637	0.0619	0.0711	0.0688	0.074	0.0695	0.0738	0.062	0.0613	0.063	0.0858	0.0777	0.0712	0.0745	0.0762	0.0636	0.0622	0.0611
2ndary only control (for blank subtraction)		0.0723	0.0663	0.0716	0.0711	0.0672	0.0682	0.0673	0.0659	0.0677	0.0779	0.0693	0.0658	0.074	0.0654	0.0656	0.0648	0.0748	0.0824	0.0686	0.0716	0.0676	0.0646	0.0679	0.066	0.077	0.0708	0.076	0.0681	0.0667	0.0656	0.0634	0.0636	0.0716	0.0767	0.0748	0.0712	0.0762	0.0614	0.062	0.0635	0.0759	0.0728	0.0706	0.074	0.0763	0.0614	0.062	0.0596
Background subtracted	Cohort	3mer	3mer	3mer	3mer	3mer	3mer	3mer	3mer	4mer	4mer	4mer	4mer	4mer	4mer	4mer	4mer	5mer	5mer	5mer	5mer	5mer	5mer	5mer	5mer	6mer	6mer	6mer	6mer	6mer	6mer	6mer	6mer	7mer	7mer	7mer	7mer	7mer	7mer	7mer	7mer	8mer	8mer	8mer	8mer	8mer	8mer	8mer	8mer
	Individual Mouse	UL	LL	UR	LR	O	377 = 054	378	379	UL	LL	UR	LR	O	380	381	382	UL	LL	UR	LR	O	383	384 = 053	385 = 052	UL	LL	UR	LR	O	386	387	388	UL	LL	UR	LR	O	389	390 = 055	391 = 056	UL	LL	UR	LR	O	392	393	394
	Dilution Factor
	50	0.8145	0.675	0.8325	0.7942	0.7659	0.9626	0.8638	0.9621	0.7134	0.763	0.7858	0.8264	0.7974	0.8655	1.0003	0.958	0.872	0.7574	0.7709	0.828	0.728	0.947	0.9546	0.9926	0.8601	0.8159	0.8426	0.7873	0.7769	0.9658	0.9294	0.8713	0.7503	0.7604	0.7671	0.7624	0.7704	0.8376	0.856	0.9223	0.7905	0.7625	0.7163	0.8037	0.7909	0.8352	0.9008	0.9148
	500	0.67	0.4483	0.7539	0.7459	0.6253	0.7955	0.4585	0.7677	0.6065	0.663	0.6586	0.6407	0.706	0.6141	0.9048	0.7836	0.7454	0.7267	0.6809	0.7042	0.5243	0.8192	0.8659	0.8215	0.8227	0.6876	0.7776	0.5717	0.5171	0.7397	0.7745	0.5679	0.4744	0.6081	0.6046	0.5704	0.6455	0.4391	0.6286	0.7706	0.6685	0.5806	0.4312	0.6572	0.6533	0.6157	0.8453	0.7607
	5001	0.3703	0.1623	0.542	0.5498	0.2964	0.3185	0.0833	0.2987	0.3684	0.4911	0.392	0.2866	0.5349	0.181	0.6933	0.3373	0.4439	0.3798	0.3112	0.472	0.2205	0.4467	0.5248	0.3615	0.5342	0.3612	0.4964	0.2213	0.1692	0.2929	0.417	0.14	0.1298	0.2495	0.2445	0.2209	0.2829	0.0783	0.185	0.4193	0.371	0.2347	0.1128	0.3063	0.3382	0.1818	0.6693	0.365
	50014	0.1333	0.0396	0.2582	0.2818	0.0977	0.0569	0.0078	0.0438	0.1434	0.2449	0.1454	0.078	0.3012	0.0223	0.249	0.0542	0.1678	0.1313	0.0975	0.1847	0.0711	0.0871	0.1234	0.0548	0.2269	0.1083	0.2068	0.049	0.0329	0.041	0.0681	0.0165	0.0152	0.0467	0.0614	0.0503	0.0653	0.0089	0.0253	0.0706	0.1139	0.0581	0.0209	0.0702	0.0957	0.0209	0.2457	0.0639
	500180	0.0501	0.0139	0.0748	0.1074	0.027	0.0053	-0.0039	0.0037	0.0459	0.1358	0.0728	0.0255	0.1395	0.0019	0.0322	0.005	0.0389	0.0261	0.0205	0.0547	0.0214	0.0106	0.0101	0.0043	0.0826	0.0233	0.0819	0.0123	0.0079	0.0049	0.0078	-0.0001	0.0064	0.0051	0.0091	0.0105	0.009	0.002	0.0046	0.0056	0.044	0.0266	0.0023	0.011	0.0241	0.0044	0.0384	0.0106
	5002251	0.0298	0.0085	0.0541	0.0585	0.0106	-0.0014	-0.0025	-0.0029	0.0172	0.0531	0.0257	0.0119	0.0432	-0.0021	0.0013	-0.0002	0.0068	0.0002	0.0084	0.0146	0.0075	0.0003	-0.0016	0	0.0274	0.0064	0.0229	0.0032	-0.0004	-0.003	0.0004	-0.0023	0.0004	-0.0049	-0.0009	-0.0003	-0.0037	0.0009	0.0012	0.0008	0.0092	0.0027	0.0022	0.0056	0.0016	-0.0016	0.0038	0.0033
	50027009	0.0369	-0.0004	0.0219	0.0352	0.0032	-0.0014	-0.0031	-0.0017	0.0062	0.0351	0.0272	0.0207	0.0327	-0.0013	-0.001	0.0002	-0.0011	-0.0023	0.0047	0.0026	0.0028	0.001	-0.0039	-0.0014	0.0077	0.0002	0.0033	0.0006	0.0006	0.0052	0.0003	-0.0017	-0.0005	-0.0079	-0.0008	-0.0017	-0.0024	0.0006	-0.0007	-0.0005	0.0099	0.0049	0.0006	0.0005	-0.0001	0.0022	0.0002	0.0015
Chose y = 0.1 as intersection point for interpolation of Sigmoid
Interpolation (for titers)	Cohort	3mer	3mer	3mer	3mer	3mer	3mer	3mer	3mer	4mer	4mer	4mer	4mer	4mer	4mer	4mer	4mer	5mer	5mer	5mer	5mer	5mer	5mer	5mer	5mer	6mer	6mer	6mer	6mer	6mer	6mer	6mer	6mer	7mer	7mer	7mer	7mer	7mer	7mer	7mer	7mer	8mer	8mer	8mer	8mer	8mer	8mer	8mer	8mer
	Individual Mouse	UL	LL	UR	LR	O	377 = 054	378	379	UL	LL	UR	LR	O	380	381	382	UL	LL	UR	LR	O	383	384 = 053	385 = 052	UL	LL	UR	LR	O	386	387	388	UL	LL	UR	LR	O	389	390 = 055	391 = 056	UL	LL	UR	LR	O	392	393	394
		92704.7	11456.2	387161	624756	40182.6	25172.8	3829.55	22680.6	102943	829253	128761	32832.3	1.06225e+06	10711.3	199128	28684	120386	55665.6	33410.5	174793	23458.9	49415.7	67094.5	30703.5	237610	53824.4	212917	17986.5	11017.1	23729.7	44231.6	7430.03	6974.64	19197.7	20795.9	17621.8	24595.1	3541.31	10967.7	44914	66383.2	20841	5937.93	30567.8	46960.9	10574.8	187189	35454
Log transform of titers	Cohort	3mer	3mer	3mer	3mer	3mer	3mer	3mer	3mer	4mer	4mer	4mer	4mer	4mer	4mer	4mer	4mer	5mer	5mer	5mer	5mer	5mer	5mer	5mer	5mer	6mer	6mer	6mer	6mer	6mer	6mer	6mer	6mer	7mer	7mer	7mer	7mer	7mer	7mer	7mer	7mer	8mer	8mer	8mer	8mer	8mer	8mer	8mer	8mer
	Individual Mouse	UL	LL	UR	LR	O	377 = 054	378	379	UL	LL	UR	LR	O	380	381	382	UL	LL	UR	LR	O	383	384 = 053	385 = 052	UL	LL	UR	LR	O	386	387	388	UL	LL	UR	LR	O	389	390 = 055	391 = 056	UL	LL	UR	LR	O	392	393	394
		4.9671	4.05904	5.58789	5.79571	4.60404	4.40093	3.58315	4.35565	5.0126	5.91869	5.10979	4.5163	6.02622	4.02984	5.29913	4.45764	5.08058	4.74559	4.52388	5.24252	4.37031	4.69387	4.82669	4.48719	5.37586	4.73098	5.32821	4.25495	4.04207	4.37529	4.64573	3.87099	3.84352	4.28325	4.31798	4.24605	4.39085	3.54916	4.04012	4.65238	4.82206	4.31892	3.77364	4.48526	4.67174	4.02427	5.27228	4.54966
[truncated: 15 more columns]

## Sheet: H4 titers
		Individual Mice from each cohort (
H4 titers (all) (d42)	Cohort	3mer	3mer	3mer	3mer	3mer	3mer	3mer	3mer	4mer	4mer	4mer	4mer	4mer	4mer	4mer	4mer	5mer	5mer	5mer	5mer	5mer	5mer	5mer	5mer	6mer	6mer	6mer	6mer	6mer	6mer	6mer	6mer	7mer	7mer	7mer	7mer	7mer	7mer	7mer	7mer	8mer	8mer	8mer	8mer	8mer	8mer	8mer	8mer
	Individual Mouse	UL	LL	UR	LR	O	377 = 054	378	379	UL	LL	UR	LR	O	380	381	382	UL	LL	UR	LR	O	383	384 = 053	385 = 052	UL	LL	UR	LR	O	386	387	388	UL	LL	UR	LR	O	389	390 = 055	391 = 056	UL	LL	UR	LR	O	392	393	394
	Dilution Factor
	50	0.8863	0.7957	0.8776	0.7692	0.7451	1.0351	0.8148	0.8858	0.8996	0.9286	0.9052	0.9753	0.9657	1.0736	1.0673	1.0664	0.9732	0.8986	0.9088	0.9125	0.8825	1.0536	1.0472	1.1033	0.9162	0.8795	0.8734	0.8632	0.9042	1.049	1.0163	0.9876	0.8984	0.8489	0.8833	0.8648	0.8624	0.9948	0.9887	0.9726	0.8565	0.8733	0.8798	0.8724	0.8791	0.9502	0.975	0.9941
	500	0.779	0.6087	0.7575	0.6193	0.3823	0.8335	0.3248	0.4311	0.8291	0.8876	0.8454	0.8619	0.9293	0.984	0.985	0.9426	0.8675	0.8534	0.8651	0.8625	0.8458	0.9482	0.9734	1.0444	0.8608	0.8293	0.8245	0.8274	0.8386	0.8794	0.9483	0.8546	0.8291	0.7924	0.8051	0.782	0.7835	0.8789	0.9046	0.8661	0.8145	0.8366	0.8245	0.8285	0.8186	0.8417	0.8784	0.9102
	5001	0.4185	0.2845	0.4301	0.3226	0.1324	0.3743	0.0961	0.1242	0.6587	0.8197	0.6793	0.7265	0.8542	0.8458	0.9074	0.7094	0.6897	0.6813	0.7224	0.7706	0.7337	0.7311	0.7486	0.8741	0.6985	0.674	0.6408	0.6126	0.6375	0.4687	0.6862	0.4885	0.5851	0.5947	0.5924	0.5043	0.5212	0.5462	0.6174	0.5244	0.6314	0.6674	0.6345	0.6969	0.6026	0.5045	0.7251	0.6666
	50014	0.186	0.1278	0.1794	0.1604	0.0752	0.1159	0.0627	0.0647	0.3877	0.6136	0.3816	0.4644	0.717	0.3942	0.4996	0.2439	0.3527	0.3813	0.3921	0.4958	0.4561	0.2663	0.2696	0.399	0.3398	0.4311	0.3114	0.2859	0.3046	0.1344	0.2303	0.1344	0.2338	0.3212	0.2936	0.2116	0.2283	0.1616	0.2142	0.1512	0.3052	0.3566	0.2983	0.3697	0.2885	0.1442	0.2869	0.2313
	500180	0.1066	0.0907	0.0894	0.0909	0.0663	0.0669	0.06	0.0586	0.1877	0.4358	0.234	0.2624	0.5364	0.1181	0.1424	0.0838	0.1782	0.1995	0.1902	0.2602	0.2956	0.0889	0.0891	0.1096	0.1879	0.1497	0.1924	0.1462	0.1704	0.0675	0.0873	0.0673	0.1341	0.1848	0.1491	0.1194	0.1134	0.0722	0.079	0.0691	0.1763	0.1889	0.1477	0.1807	0.1554	0.0692	0.0946	0.0836
	5002251	0.0883	0.0819	0.0878	0.079	0.0645	0.0621	0.0582	0.0581	0.1159	0.2696	0.1623	0.182	0.27	0.0721	0.0698	0.0632	0.1087	0.1237	0.128	0.1449	0.1969	0.0631	0.063	0.0664	0.1207	0.1074	0.1257	0.1019	0.1077	0.0607	0.0633	0.0597	0.1017	0.1256	0.1057	0.0935	0.0876	0.0619	0.0624	0.0654	0.132	0.1224	0.1264	0.1283	0.1016	0.0603	0.0637	0.0603
	50027009	0.1087	0.0727	0.0752	0.0773	0.0667	0.0602	0.0591	0.0598	0.0921	0.1848	0.1642	0.1516	0.2792	0.0608	0.0618	0.061	0.1223	0.0952	0.1015	0.1089	0.1453	0.0618	0.0606	0.0604	0.0914	0.0844	0.0904	0.0781	0.0853	0.0602	0.0606	0.058	0.0827	0.0992	0.0895	0.0793	0.0796	0.0593	0.059	0.0598	0.1055	0.098	0.0956	0.0982	0.0865	0.0588	0.059	0.0588
2ndary only control (for blank subtraction)		0.0706	0.0745	0.068	0.069	0.0652	0.0612	0.062	0.0582	0.0895	0.1102	0.0921	0.0899	0.1381	0.0596	0.06	0.0594	0.0838	0.0838	0.0898	0.1029	0.087	0.0587	0.0598	0.0598	0.0863	0.077	0.0808	0.0767	0.0799	0.0615	0.059	0.0599	0.0754	0.085	0.082	0.0761	0.0743	0.0588	0.0606	0.0586	0.0905	0.0866	0.0859	0.0916	0.08	0.0587	0.0602	0.0605
Background subtracted	Cohort	3mer	3mer	3mer	3mer	3mer	3mer	3mer	3mer	4mer	4mer	4mer	4mer	4mer	4mer	4mer	4mer	5mer	5mer	5mer	5mer	5mer	5mer	5mer	5mer	6mer	6mer	6mer	6mer	6mer	6mer	6mer	6mer	7mer	7mer	7mer	7mer	7mer	7mer	7mer	7mer	8mer	8mer	8mer	8mer	8mer	8mer	8mer	8mer
	Individual Mouse	UL	LL	UR	LR	O	377 = 054	378	379	UL	LL	UR	LR	O	380	381	382	UL	LL	UR	LR	O	383	384 = 053	385 = 052	UL	LL	UR	LR	O	386	387	388	UL	LL	UR	LR	O	389	390 = 055	391 = 056	UL	LL	UR	LR	O	392	393	394
	Dilution Factor
	50	0.8157	0.7212	0.8096	0.7002	0.6799	0.9739	0.7528	0.8276	0.8101	0.8184	0.8131	0.8854	0.8276	1.014	1.0073	1.007	0.8894	0.8148	0.819	0.8096	0.7955	0.9949	0.9874	1.0435	0.8299	0.8025	0.7926	0.7865	0.8243	0.9875	0.9573	0.9277	0.823	0.7639	0.8013	0.7887	0.7881	0.936	0.9281	0.914	0.766	0.7867	0.7939	0.7808	0.7991	0.8915	0.9148	0.9336
	500	0.7084	0.5342	0.6895	0.5503	0.3171	0.7723	0.2628	0.3729	0.7396	0.7774	0.7533	0.772	0.7912	0.9244	0.925	0.8832	0.7837	0.7696	0.7753	0.7596	0.7588	0.8895	0.9136	0.9846	0.7745	0.7523	0.7437	0.7507	0.7587	0.8179	0.8893	0.7947	0.7537	0.7074	0.7231	0.7059	0.7092	0.8201	0.844	0.8075	0.724	0.75	0.7386	0.7369	0.7386	0.783	0.8182	0.8497
	5001	0.3479	0.21	0.3621	0.2536	0.0672	0.3131	0.0341	0.066	0.5692	0.7095	0.5872	0.6366	0.7161	0.7862	0.8474	0.65	0.6059	0.5975	0.6326	0.6677	0.6467	0.6724	0.6888	0.8143	0.6122	0.597	0.56	0.5359	0.5576	0.4072	0.6272	0.4286	0.5097	0.5097	0.5104	0.4282	0.4469	0.4874	0.5568	0.4658	0.5409	0.5808	0.5486	0.6053	0.5226	0.4458	0.6649	0.6061
	50014	0.1154	0.0533	0.1114	0.0914	0.01	0.0547	0.0007	0.0065	0.2982	0.5034	0.2895	0.3745	0.5789	0.3346	0.4396	0.1845	0.2689	0.2975	0.3023	0.3929	0.3691	0.2076	0.2098	0.3392	0.2535	0.3541	0.2306	0.2092	0.2247	0.0729	0.1713	0.0745	0.1584	0.2362	0.2116	0.1355	0.154	0.1028	0.1536	0.0926	0.2147	0.27	0.2124	0.2781	0.2085	0.0855	0.2267	0.1708
	500180	0.036	0.0162	0.0214	0.0219	0.0011	0.0057	-0.002	0.0004	0.0982	0.3256	0.1419	0.1725	0.3983	0.0585	0.0824	0.0244	0.0944	0.1157	0.1004	0.1573	0.2086	0.0302	0.0293	0.0498	0.1016	0.0727	0.1116	0.0695	0.0905	0.006	0.0283	0.0074	0.0587	0.0998	0.0671	0.0433	0.0391	0.0134	0.0184	0.0105	0.0858	0.1023	0.0618	0.0891	0.0754	0.0105	0.0344	0.0231
	5002251	0.0177	0.0074	0.0198	0.01	-0.0007	0.0009	-0.0038	-0.0001	0.0264	0.1594	0.0702	0.0921	0.1319	0.0125	0.0098	0.0038	0.0249	0.0399	0.0382	0.042	0.1099	0.0044	0.0032	0.0066	0.0344	0.0304	0.0449	0.0252	0.0278	-0.0008	0.0043	-0.0002	0.0263	0.0406	0.0237	0.0174	0.0133	0.0031	0.0018	0.0068	0.0415	0.0358	0.0405	0.0367	0.0216	0.0016	0.0035	-0.0002
	50027009	0.0381	-0.0018	0.0072	0.0083	0.0015	-0.001	-0.0029	0.0016	0.0026	0.0746	0.0721	0.0617	0.1411	0.0012	0.0018	0.0016	0.0385	0.0114	0.0117	0.006	0.0583	0.0031	0.0008	0.0006	0.0051	0.0074	0.0096	0.0014	0.0054	-0.0013	0.0016	-0.0019	0.0073	0.0142	0.0075	0.0032	0.0053	0.0005	-0.0016	0.0012	0.015	0.0114	0.0097	0.0066	0.0065	0.0001	-0.0012	-0.0017
Chose y = 0.1 as intersection point for interpolation of Sigmoid
Interpolation (for titers)	Cohort	3mer	3mer	3mer	3mer	3mer	3mer	3mer	3mer	4mer	4mer	4mer	4mer	4mer	4mer	4mer	4mer	5mer	5mer	5mer	5mer	5mer	5mer	5mer	5mer	6mer	6mer	6mer	6mer	6mer	6mer	6mer	6mer	7mer	7mer	7mer	7mer	7mer	7mer	7mer	7mer	8mer	8mer	8mer	8mer	8mer	8mer	8mer	8mer
	Individual Mouse	UL	LL	UR	LR	O	377 = 054	378	379	UL	LL	UR	LR	O	380	381	382	UL	LL	UR	LR	O	383	384 = 053	385 = 052	UL	LL	UR	LR	O	386	387	388	UL	LL	UR	LR	O	389	390 = 055	391 = 056	UL	LL	UR	LR	O	392	393	394
		51304.5	17488.2	54511.9	33267	2958.73	25215.5	1633.12	3050.65	513971	2.1274e+07	1.3397e+06	3.43707e+06	50	295594	442361	122060	425518	559751	444173	1.08897e+06	5.18262e+06	140346	132040	269646	324663	526209	336307	188780	265412	40622	102139	42568.8	115587	372022	219766	84610.3	102145	58438.6	89948.5	50536.3	235245	400118	196815	351197	210166	46867.5	156560	103837
Log transform of titers	Cohort	3mer	3mer	3mer	3mer	3mer	3mer	3mer	3mer	4mer	4mer	4mer	4mer	4mer	4mer	4mer	4mer	5mer	5mer	5mer	5mer	5mer	5mer	5mer	5mer	6mer	6mer	6mer	6mer	6mer	6mer	6mer	6mer	7mer	7mer	7mer	7mer	7mer	7mer	7mer	7mer	8mer	8mer	8mer	8mer	8mer	8mer	8mer	8mer
	Individual Mouse	UL	LL	UR	LR	O	377 = 054	378	379	UL	LL	UR	LR	O	380	381	382	UL	LL	UR	LR	O	383	384 = 053	385 = 052	UL	LL	UR	LR	O	386	387	388	UL	LL	UR	LR	O	389	390 = 055	391 = 056	UL	LL	UR	LR	O	392	393	394
		4.71016	4.24274	4.73649	4.52201	3.47111	4.40167	3.21302	3.48439	5.71094	7.32785	6.12701	6.53619	1.69897	5.4707	5.64578	5.08657	5.62892	5.74799	5.64755	6.03702	6.71455	5.1472	5.12071	5.43079	5.51143	5.72116	5.52674	5.27596	5.42392	4.60876	5.00919	4.62909	5.06291	5.57057	5.34196	4.92742	5.00922	4.7667	4.95399	4.7036	5.37152	5.60219	5.29406	5.54555	5.32256	4.67087	5.19468	5.01635
[truncated: 15 more columns]

## Sheet: H5 titers
		Individual Mice from each cohort (
H5 titers (all) (d42)	Cohort	3mer	3mer	3mer	3mer	3mer	3mer	3mer	3mer	4mer	4mer	4mer	4mer	4mer	4mer	4mer	4mer	5mer	5mer	5mer	5mer	5mer	5mer	5mer	5mer	6mer	6mer	6mer	6mer	6mer	6mer	6mer	6mer	7mer	7mer	7mer	7mer	7mer	7mer	7mer	7mer	8mer	8mer	8mer	8mer	8mer	8mer	8mer	8mer
	Individual Mouse	UL	LL	UR	LR	O	377 = 054	378	379	UL	LL	UR	LR	O	380	381	382	UL	LL	UR	LR	O	383	384 = 053	385 = 052	UL	LL	UR	LR	O	386	387	388	UL	LL	UR	LR	O	389	390 = 055	391 = 056	UL	LL	UR	LR	O	392	393	394
	Dilution Factor
	50	0.5943	0.6833	0.6352	0.6934	0.3424	0.8657	0.3229	0.661	0.4991	0.6983	0.4452	0.7226	0.6242	0.3761	0.8422	0.7654	0.9166	0.8477	0.8236	0.8839	0.832	0.9783	1.0476	1.06	0.8913	0.7853	0.8954	0.8847	0.8245	1.0266	0.9945	0.9952	0.8785	0.8574	0.8683	0.8249	0.8085	0.9905	0.9877	0.9535	0.787	0.7978	0.8098	0.7852	0.7643	0.8275	0.9234	0.9143
	500	0.2739	0.4736	0.3291	0.4379	0.1167	0.5023	0.1204	0.2219	0.2882	0.4876	0.2046	0.5973	0.3541	0.1259	0.5802	0.3927	0.8498	0.6925	0.6878	0.7901	0.7041	0.9141	0.9678	0.9575	0.8239	0.598	0.7731	0.631	0.6919	0.85	0.7781	0.7851	0.7172	0.686	0.7476	0.6501	0.6228	0.8422	0.8332	0.7836	0.5564	0.6528	0.5761	0.6932	0.5588	0.4364	0.8142	0.5863
	5001	0.1118	0.2175	0.1155	0.1788	0.0689	0.1523	0.0661	0.0791	0.13	0.2351	0.0935	0.3234	0.1547	0.0723	0.1943	0.1114	0.6444	0.382	0.3314	0.4767	0.4504	0.5823	0.6235	0.6062	0.5234	0.2487	0.4671	0.2849	0.3335	0.4114	0.2974	0.3093	0.4249	0.3408	0.4084	0.2765	0.2778	0.4141	0.3697	0.3176	0.2309	0.3208	0.2376	0.3597	0.2314	0.1281	0.4092	0.1724
	50014	0.0808	0.1027	0.0856	0.1005	0.0644	0.0759	0.0601	0.061	0.0856	0.107	0.0746	0.1612	0.1161	0.061	0.0791	0.0644	0.3296	0.1655	0.1297	0.2214	0.2249	0.187	0.1853	0.1783	0.2139	0.108	0.1921	0.1269	0.1462	0.1147	0.0914	0.096	0.1785	0.1303	0.1616	0.1147	0.1208	0.1179	0.1062	0.093	0.097	0.1483	0.099	0.1398	0.1013	0.0685	0.1146	0.0787
	500180	0.0874	0.0792	0.0692	0.0764	0.0663	0.0642	0.0591	0.0604	0.0821	0.0849	0.0733	0.11	0.0802	0.0604	0.0624	0.0607	0.1568	0.0951	0.0842	0.1235	0.1354	0.0735	0.0754	0.0739	0.1319	0.0762	0.1127	0.088	0.0962	0.0658	0.0636	0.0629	0.1045	0.0803	0.0966	0.0806	0.0795	0.0662	0.0627	0.062	0.0729	0.0967	0.0734	0.0856	0.0763	0.0618	0.0655	0.0617
	5002251	0.0728	0.0761	0.0707	0.0733	0.069	0.0652	0.0611	0.0591	0.0773	0.0787	0.0712	0.0923	0.076	0.0601	0.0595	0.0606	0.1032	0.0793	0.0728	0.0883	0.1026	0.0603	0.0627	0.0615	0.0909	0.0768	0.092	0.0758	0.0772	0.0619	0.0613	0.0621	0.0815	0.0741	0.0761	0.0707	0.0693	0.0602	0.0616	0.0597	0.0683	0.1706	0.0696	0.0688	0.0667	0.0598	0.0592	0.0591
	50027009	0.0741	0.0781	0.0755	0.0781	0.0732	0.0626	0.0601	0.0606	0.0724	0.0741	0.0702	0.0871	0.0732	0.0607	0.0613	0.0596	0.0904	0.0742	0.0719	0.0773	0.086	0.061	0.0592	0.0602	0.0778	0.0725	0.0767	0.0732	0.0827	0.0622	0.0587	0.0596	0.0792	0.0699	0.0723	0.0699	0.0708	0.0719	0.0595	0.0589	0.0672	0.0871	0.069	0.0675	0.0696	0.0586	0.0597	0.0593
2ndary only control (for blank subtraction)		0.0783	0.0762	0.0764	0.075	0.0731	0.064	0.0627	0.0646	0.0988	0.0734	0.0759	0.0787	0.0732	0.062	0.0616	0.0609	0.0823	0.074	0.0809	0.0761	0.0769	0.0617	0.062	0.0614	0.0843	0.0728	0.0755	0.0763	0.071	0.0658	0.0614	0.0619	0.0847	0.0816	0.0731	0.0711	0.0717	0.06	0.0622	0.0608	0.0698	0.0724	0.0712	0.0769	0.0711	0.0591	0.0612	0.0602
Background subtracted	Cohort	3mer	3mer	3mer	3mer	3mer	3mer	3mer	3mer	4mer	4mer	4mer	4mer	4mer	4mer	4mer	4mer	5mer	5mer	5mer	5mer	5mer	5mer	5mer	5mer	6mer	6mer	6mer	6mer	6mer	6mer	6mer	6mer	7mer	7mer	7mer	7mer	7mer	7mer	7mer	7mer	8mer	8mer	8mer	8mer	8mer	8mer	8mer	8mer
	Individual Mouse	UL	LL	UR	LR	O	377 = 054	378	379	UL	LL	UR	LR	O	380	381	382	UL	LL	UR	LR	O	383	384 = 053	385 = 052	UL	LL	UR	LR	O	386	387	388	UL	LL	UR	LR	O	389	390 = 055	391 = 056	UL	LL	UR	LR	O	392	393	394
	Dilution Factor
	50	0.516	0.6071	0.5588	0.6184	0.2693	0.8017	0.2602	0.5964	0.4003	0.6249	0.3693	0.6439	0.551	0.3141	0.7806	0.7045	0.8343	0.7737	0.7427	0.8078	0.7551	0.9166	0.9856	0.9986	0.807	0.7125	0.8199	0.8084	0.7535	0.9608	0.9331	0.9333	0.7938	0.7758	0.7952	0.7538	0.7368	0.9305	0.9255	0.8927	0.7172	0.7254	0.7386	0.7083	0.6932	0.7684	0.8622	0.8541
	500	0.1956	0.3974	0.2527	0.3629	0.0436	0.4383	0.0577	0.1573	0.1894	0.4142	0.1287	0.5186	0.2809	0.0639	0.5186	0.3318	0.7675	0.6185	0.6069	0.714	0.6272	0.8524	0.9058	0.8961	0.7396	0.5252	0.6976	0.5547	0.6209	0.7842	0.7167	0.7232	0.6325	0.6044	0.6745	0.579	0.5511	0.7822	0.771	0.7228	0.4866	0.5804	0.5049	0.6163	0.4877	0.3773	0.753	0.5261
	5001	0.0335	0.1413	0.0391	0.1038	-0.0042	0.0883	0.0034	0.0145	0.0312	0.1617	0.0176	0.2447	0.0815	0.0103	0.1327	0.0505	0.5621	0.308	0.2505	0.4006	0.3735	0.5206	0.5615	0.5448	0.4391	0.1759	0.3916	0.2086	0.2625	0.3456	0.236	0.2474	0.3402	0.2592	0.3353	0.2054	0.2061	0.3541	0.3075	0.2568	0.1611	0.2484	0.1664	0.2828	0.1603	0.069	0.348	0.1122
	50014	0.0025	0.0265	0.0092	0.0255	-0.0087	0.0119	-0.0026	-0.0036	-0.0132	0.0336	-0.0013	0.0825	0.0429	-0.001	0.0175	0.0035	0.2473	0.0915	0.0488	0.1453	0.148	0.1253	0.1233	0.1169	0.1296	0.0352	0.1166	0.0506	0.0752	0.0489	0.03	0.0341	0.0938	0.0487	0.0885	0.0436	0.0491	0.0579	0.044	0.0322	0.0272	0.0759	0.0278	0.0629	0.0302	0.0094	0.0534	0.0185
	500180	0.0091	0.003	-0.0072	0.0014	-0.0068	0.0002	-0.0036	-0.0042	-0.0167	0.0115	-0.0026	0.0313	0.007	-0.0016	0.0008	-0.0002	0.0745	0.0211	0.0033	0.0474	0.0585	0.0118	0.0134	0.0125	0.0476	0.0034	0.0372	0.0117	0.0252	0	0.0022	0.001	0.0198	-0.0013	0.0235	0.0095	0.0078	0.0062	0.0005	0.0012	0.0031	0.0243	0.0022	0.0087	0.0052	0.0027	0.0043	0.0015
	5002251	-0.0055	-0.0001	-0.0057	-0.0017	-0.0041	0.0012	-0.0016	-0.0055	-0.0215	0.0053	-0.0047	0.0136	0.0028	-0.0019	-0.0021	-0.0003	0.0209	0.0053	-0.0081	0.0122	0.0257	-0.0014	0.0007	0.0001	0.0066	0.004	0.0165	-0.0005	0.0062	-0.0039	-0.0001	0.0002	-0.0032	-0.0075	0.003	-0.0004	-0.0024	0.0002	-0.0006	-0.0011	-0.0015	0.0982	-0.0016	-0.0081	-0.0044	0.0007	-0.002	-0.0011
	50027009	-0.0042	0.0019	-0.0009	0.0031	0.0001	-0.0014	-0.0026	-0.004	-0.0264	0.0007	-0.0057	0.0084	0	-0.0013	-0.0003	-0.0013	0.0081	0.0002	-0.009	0.0012	0.0091	-0.0007	-0.0028	-0.0012	-0.0065	-0.0003	0.0012	-0.0031	0.0117	-0.0036	-0.0027	-0.0023	-0.0055	-0.0117	-0.0008	-0.0012	-0.0009	0.0119	-0.0027	-0.0019	-0.0026	0.0147	-0.0022	-0.0094	-0.0015	-0.0005	-0.0015	-0.0009
Chose y = 0.1 as intersection point for interpolation of Sigmoid
Interpolation (for titers)	Cohort	3mer	3mer	3mer	3mer	3mer	3mer	3mer	3mer	4mer	4mer	4mer	4mer	4mer	4mer	4mer	4mer	5mer	5mer	5mer	5mer	5mer	5mer	5mer	5mer	6mer	6mer	6mer	6mer	6mer	6mer	6mer	6mer	7mer	7mer	7mer	7mer	7mer	7mer	7mer	7mer	8mer	8mer	8mer	8mer	8mer	8mer	8mer	8mer
	Individual Mouse	UL	LL	UR	LR	O	377 = 054	378	379	UL	LL	UR	LR	O	380	381	382	UL	LL	UR	LR	O	383	384 = 053	385 = 052	UL	LL	UR	LR	O	386	387	388	UL	LL	UR	LR	O	389	390 = 055	391 = 056	UL	LL	UR	LR	O	392	393	394
		1306.54	8581.97	1821.92	5431.58	297.262	4062.19	419.387	688.339	1404.32	11283.1	713.068	30413.7	4194.37	427.539	6984.01	2139.33	283680	42129	19087.5	89181.6	121732	64915	66899.1	66137.1	75271.8	11247.2	68200.7	17218.3	24925.6	28758.9	15155.7	16492.1	50324.8	21473.6	39737.4	14187.7	15648.7	30711.2	22048.7	16600.6	10030.3	27488.9	10422.1	24096.4	9988.2	2966.79	26751.7	5629.57
Log transform of titers	Cohort	3mer	3mer	3mer	3mer	3mer	3mer	3mer	3mer	4mer	4mer	4mer	4mer	4mer	4mer	4mer	4mer	5mer	5mer	5mer	5mer	5mer	5mer	5mer	5mer	6mer	6mer	6mer	6mer	6mer	6mer	6mer	6mer	7mer	7mer	7mer	7mer	7mer	7mer	7mer	7mer	8mer	8mer	8mer	8mer	8mer	8mer	8mer	8mer
	Individual Mouse	UL	LL	UR	LR	O	377 = 054	378	379	UL	LL	UR	LR	O	380	381	382	UL	LL	UR	LR	O	383	384 = 053	385 = 052	UL	LL	UR	LR	O	386	387	388	UL	LL	UR	LR	O	389	390 = 055	391 = 056	UL	LL	UR	LR	O	392	393	394
		3.11612	3.93359	3.26053	3.73493	2.47314	3.60876	2.62262	2.8378	3.14747	4.05243	2.85313	4.48307	3.62267	2.63098	3.8441	3.33028	5.45283	4.62458	4.28075	4.95028	5.0854	4.81235	4.82542	4.82044	4.87663	4.05104	4.83379	4.23599	4.39664	4.45877	4.18058	4.21728	4.70178	4.33191	4.5992	4.15191	4.19448	4.4873	4.34338	4.22012	4.00132	4.43916	4.01795	4.38195	3.99949	3.47229	4.42735	3.75048
[truncated: 15 more columns]

## Sheet: H7 titers
		Individual Mice from each cohort (
H7 titers (all) (d42)	Cohort	3mer	3mer	3mer	3mer	3mer	3mer	3mer	3mer	4mer	4mer	4mer	4mer	4mer	4mer	4mer	4mer	5mer	5mer	5mer	5mer	5mer	5mer	5mer	5mer	6mer	6mer	6mer	6mer	6mer	6mer	6mer	6mer	7mer	7mer	7mer	7mer	7mer	7mer	7mer	7mer	8mer	8mer	8mer	8mer	8mer	8mer	8mer	8mer
	Individual Mouse	UL	LL	UR	LR	O	377 = 054	378	379	UL	LL	UR	LR	O	380	381	382	UL	LL	UR	LR	O	383	384 = 053	385 = 052	UL	LL	UR	LR	O	386	387	388	UL	LL	UR	LR	O	389	390 = 055	391 = 056	UL	LL	UR	LR	O	392	393	394
	Dilution Factor
	50	0.1681	0.0854	0.4151	0.1605	0.091	0.5065	0.2427	0.2166	0.1801	0.0963	0.0969	0.1805	0.4546	0.5022	0.6095	0.779	0.1562	0.2494	0.4088	0.1183	0.2954	0.9768	0.8538	0.9647	0.8482	0.703	0.7473	0.7839	0.7871	0.965	0.8852	0.3184	0.4275	0.5191	0.7028	0.3	0.3973	0.5122	0.7383	0.877	0.6235	0.8062	0.6352	0.7232	0.7274	0.783	0.7917	0.7611
	500	0.0862	0.06	0.2337	0.0774	0.0588	0.2676	0.0921	0.0789	0.0854	0.0634	0.0657	0.1008	0.2542	0.1493	0.2261	0.5636	0.0939	0.1039	0.2126	0.0683	0.1312	0.8975	0.4647	0.5527	0.6759	0.5222	0.6444	0.5732	0.6448	0.774	0.6073	0.1028	0.1546	0.2562	0.5023	0.1368	0.1779	0.1879	0.3762	0.62	0.3506	0.707	0.3459	0.5329	0.4528	0.4253	0.4765	0.382
	5001	0.0655	0.0564	0.1045	0.0582	0.056	0.1011	0.0693	0.066	0.0609	0.0578	0.0579	0.0647	0.1026	0.0765	0.0889	0.2159	0.0661	0.0646	0.0935	0.0635	0.0714	0.4561	0.1368	0.1559	0.3371	0.2294	0.3497	0.2216	0.3293	0.3284	0.1992	0.0681	0.081	0.1049	0.1974	0.0756	0.0786	0.0848	0.1226	0.2135	0.14	0.3913	0.1355	0.2304	0.1747	0.1311	0.1651	0.1304
	50014	0.0678	0.0598	0.071	0.0593	0.0658	0.0739	0.0671	0.0655	0.0612	0.063	0.0605	0.0622	0.0753	0.0663	0.0687	0.0819	0.0688	0.0638	0.0692	0.0646	0.0651	0.1347	0.0738	0.075	0.1254	0.1257	0.1588	0.1005	0.1391	0.1032	0.0818	0.0645	0.0838	0.0798	0.1006	0.08	0.0755	0.0681	0.0728	0.0841	0.0887	0.1871	0.0852	0.1126	0.0988	0.0721	0.0766	0.0719
	500180	0.0714	0.0698	0.074	0.0687	0.0657	0.0704	0.0656	0.0663	0.0704	0.0651	0.0654	0.0632	0.0696	0.0721	0.0675	0.0704	0.0722	0.0692	0.0698	0.0665	0.0666	0.0732	0.0663	0.068	0.0851	0.0835	0.0987	0.0845	0.0943	0.072	0.0662	0.0632	0.0817	0.0783	0.0841	0.073	0.0795	0.0645	0.066	0.067	0.0801	0.1373	0.0828	0.087	0.0874	0.0661	0.0659	0.0656
	5002251	0.0761	0.0737	0.0737	0.0689	0.0678	0.0705	0.0664	0.0655	0.07	0.0683	0.068	0.0655	0.0708	0.0649	0.0661	0.0667	0.0808	0.0705	0.069	0.0723	0.0696	0.066	0.0656	0.0652	0.0799	0.0769	0.0796	0.0748	0.0803	0.0679	0.0652	0.0671	0.0808	0.0774	0.0788	0.0772	0.0814	0.0636	0.0658	0.067	0.0765	0.3314	0.0804	0.0812	0.0788	0.0657	0.0647	0.065
	50027009	0.0774	0.0693	0.0733	0.0702	0.0709	0.0724	0.0678	0.0671	0.069	0.0691	0.0672	0.0698	0.0701	0.0668	0.0668	0.068	0.0879	0.0793	0.0834	0.0828	0.0752	0.0677	0.066	0.0663	0.0829	0.0856	0.0802	0.0797	0.0971	0.0688	0.067	0.08	0.0799	0.0798	0.0827	0.0798	0.0778	0.0665	0.0686	0.0654	0.0775	0.0947	0.0784	0.0829	0.0861	0.0656	0.0639	0.0667
2ndary only control (for blank subtraction)		0.0789	0.0754	0.0703	0.0715	0.0727	0.073	0.0702	0.0687	0.0743	0.0729	0.0706	0.0736	0.0742	0.0674	0.069	0.0678	0.0843	0.0882	0.0815	0.0801	0.0841	0.0684	0.0677	0.0654	0.0818	0.0855	0.0848	0.0811	0.0875	0.0694	0.0669	0.0669	0.0826	0.0839	0.0788	0.0749	0.0788	0.0666	0.0673	0.0671	0.0765	0.083	0.0827	0.0818	0.0874	0.0662	0.0673	0.0672
Background subtracted	Cohort	3mer	3mer	3mer	3mer	3mer	3mer	3mer	3mer	4mer	4mer	4mer	4mer	4mer	4mer	4mer	4mer	5mer	5mer	5mer	5mer	5mer	5mer	5mer	5mer	6mer	6mer	6mer	6mer	6mer	6mer	6mer	6mer	7mer	7mer	7mer	7mer	7mer	7mer	7mer	7mer	8mer	8mer	8mer	8mer	8mer	8mer	8mer	8mer
	Individual Mouse	UL	LL	UR	LR	O	377 = 054	378	379	UL	LL	UR	LR	O	380	381	382	UL	LL	UR	LR	O	383	384 = 053	385 = 052	UL	LL	UR	LR	O	386	387	388	UL	LL	UR	LR	O	389	390 = 055	391 = 056	UL	LL	UR	LR	O	392	393	394
	Dilution Factor
	50	0.0892	0.01	0.3448	0.089	0.0183	0.4335	0.1725	0.1479	0.1058	0.0234	0.0263	0.1069	0.3804	0.4348	0.5405	0.7112	0.0719	0.1612	0.3273	0.0382	0.2113	0.9084	0.7861	0.8993	0.7664	0.6175	0.6625	0.7028	0.6996	0.8956	0.8183	0.2515	0.3449	0.4352	0.624	0.2251	0.3185	0.4456	0.671	0.8099	0.547	0.7232	0.5525	0.6414	0.64	0.7168	0.7244	0.6939
	500	0.0073	-0.0154	0.1634	0.0059	-0.0139	0.1946	0.0219	0.0102	0.0111	-0.0095	-0.0049	0.0272	0.18	0.0819	0.1571	0.4958	0.0096	0.0157	0.1311	-0.0118	0.0471	0.8291	0.397	0.4873	0.5941	0.4367	0.5596	0.4921	0.5573	0.7046	0.5404	0.0359	0.072	0.1723	0.4235	0.0619	0.0991	0.1213	0.3089	0.5529	0.2741	0.624	0.2632	0.4511	0.3654	0.3591	0.4092	0.3148
	5001	-0.0134	-0.019	0.0342	-0.0133	-0.0167	0.0281	-0.0009	-0.0027	-0.0134	-0.0151	-0.0127	-0.0089	0.0284	0.0091	0.0199	0.1481	-0.0182	-0.0236	0.012	-0.0166	-0.0127	0.3877	0.0691	0.0905	0.2553	0.1439	0.2649	0.1405	0.2418	0.259	0.1323	0.0012	-0.0016	0.021	0.1186	0.0007	-0.0002	0.0182	0.0553	0.1464	0.0635	0.3083	0.0528	0.1486	0.0873	0.0649	0.0978	0.0632
	50014	-0.0111	-0.0156	0.0007	-0.0122	-0.0069	0.0009	-0.0031	-0.0032	-0.0131	-0.0099	-0.0101	-0.0114	0.0011	-0.0011	-0.0003	0.0141	-0.0155	-0.0244	-0.0123	-0.0155	-0.019	0.0663	0.0061	0.0096	0.0436	0.0402	0.074	0.0194	0.0516	0.0338	0.0149	-0.0024	0.0012	-0.0041	0.0218	0.0051	-0.0033	0.0015	0.0055	0.017	0.0122	0.1041	0.0025	0.0308	0.0114	0.0059	0.0093	0.0047
	500180	-0.0075	-0.0056	0.0037	-0.0028	-0.007	-0.0026	-0.0046	-0.0024	-0.0039	-0.0078	-0.0052	-0.0104	-0.0046	0.0047	-0.0015	0.0026	-0.0121	-0.019	-0.0117	-0.0136	-0.0175	0.0048	-0.0014	0.0026	0.0033	-0.002	0.0139	0.0034	0.0068	0.0026	-0.0007	-0.0037	-0.0009	-0.0056	0.0053	-0.0019	0.0007	-0.0021	-0.0013	-0.0001	0.0036	0.0543	0.0001	0.0052	0	-0.0001	-0.0014	-0.0016
	5002251	-0.0028	-0.0017	0.0034	-0.0026	-0.0049	-0.0025	-0.0038	-0.0032	-0.0043	-0.0046	-0.0026	-0.0081	-0.0034	-0.0025	-0.0029	-0.0011	-0.0035	-0.0177	-0.0125	-0.0078	-0.0145	-0.0024	-0.0021	-0.0002	-0.0019	-0.0086	-0.0052	-0.0063	-0.0072	-0.0015	-0.0017	0.0002	-0.0018	-0.0065	0	0.0023	0.0026	-0.003	-0.0015	-0.0001	0	0.2484	-0.0023	-0.0006	-0.0086	-0.0005	-0.0026	-0.0022
	50027009	-0.0015	-0.0061	0.003	-0.0013	-0.0018	-0.0006	-0.0024	-0.0016	-0.0053	-0.0038	-0.0034	-0.0038	-0.0041	-0.0006	-0.0022	0.0002	0.0036	-0.0089	0.0019	0.0027	-0.0089	-0.0007	-0.0017	0.0009	0.0011	0.0001	-0.0046	-0.0014	0.0096	-0.0006	0.0001	0.0131	-0.0027	-0.0041	0.0039	0.0049	-0.001	-0.0001	0.0013	-0.0017	0.001	0.0117	-0.0043	0.0011	-0.0013	-0.0006	-0.0034	-0.0005
Chose y = 0.1 as intersection point for interpolation of Sigmoid
Interpolation (for titers)	Cohort	3mer	3mer	3mer	3mer	3mer	3mer	3mer	3mer	4mer	4mer	4mer	4mer	4mer	4mer	4mer	4mer	5mer	5mer	5mer	5mer	5mer	5mer	5mer	5mer	6mer	6mer	6mer	6mer	6mer	6mer	6mer	6mer	7mer	7mer	7mer	7mer	7mer	7mer	7mer	7mer	8mer	8mer	8mer	8mer	8mer	8mer	8mer	8mer
	Individual Mouse	UL	LL	UR	LR	O	377 = 054	378	379	UL	LL	UR	LR	O	380	381	382	UL	LL	UR	LR	O	383	384 = 053	385 = 052	UL	LL	UR	LR	O	386	387	388	UL	LL	UR	LR	O	389	390 = 055	391 = 056	UL	LL	UR	LR	O	392	393	394
		50	50	1120.19	50	50	1256.65	103.352	251.103	217.765	50	50	241.384	1207.09	400.131	878.05	8187.23	50	336.786	716.929	50	274.887	28000.9	3313.79	4456.67	20699.5	9206.33	27472.4	7765.59	20206.4	17283.1	6965.15	350.146	461.555	1027.09	6345.26	440.349	498.119	648.694	2471.98	7943.68	2675.21	1.64176e+06	2216.59	9092.66	4216.77	3027.4	4803.91	2766.2
Log transform of titers	Cohort	3mer	3mer	3mer	3mer	3mer	3mer	3mer	3mer	4mer	4mer	4mer	4mer	4mer	4mer	4mer	4mer	5mer	5mer	5mer	5mer	5mer	5mer	5mer	5mer	6mer	6mer	6mer	6mer	6mer	6mer	6mer	6mer	7mer	7mer	7mer	7mer	7mer	7mer	7mer	7mer	8mer	8mer	8mer	8mer	8mer	8mer	8mer	8mer
	Individual Mouse	UL	LL	UR	LR	O	377 = 054	378	379	UL	LL	UR	LR	O	380	381	382	UL	LL	UR	LR	O	383	384 = 053	385 = 052	UL	LL	UR	LR	O	386	387	388	UL	LL	UR	LR	O	389	390 = 055	391 = 056	UL	LL	UR	LR	O	392	393	394
		1.69897	1.69897	3.04929	1.69897	1.69897	3.09921	2.01432	2.39985	2.33799	1.69897	1.69897	2.38271	3.08174	2.6022	2.94352	3.91314	1.69897	2.52735	2.85548	1.69897	2.43915	4.44717	3.52032	3.64901	4.31596	3.96409	4.4389	3.89017	4.30549	4.23762	3.84293	2.54425	2.66422	3.01161	3.80245	2.6438	2.69733	2.81204	3.39305	3.90002	3.42736	6.21531	3.34568	3.95869	3.62498	3.48107	3.68159	3.44188
[truncated: 15 more columns]

## Sheet: H9 titers
		Individual Mice from each cohort (
H9 titers (all) (d42)	Cohort	3mer	3mer	3mer	3mer	3mer	3mer	3mer	3mer	4mer	4mer	4mer	4mer	4mer	4mer	4mer	4mer	5mer	5mer	5mer	5mer	5mer	5mer	5mer	5mer	6mer	6mer	6mer	6mer	6mer	6mer	6mer	6mer	7mer	7mer	7mer	7mer	7mer	7mer	7mer	7mer	8mer	8mer	8mer	8mer	8mer	8mer	8mer	8mer
	Individual Mouse	UL	LL	UR	LR	O	377 = 054	378	379	UL	LL	UR	LR	O	380	381	382	UL	LL	UR	LR	O	383	384 = 053	385 = 052	UL	LL	UR	LR	O	386	387	388	UL	LL	UR	LR	O	389	390 = 055	391 = 056	UL	LL	UR	LR	O	392	393	394
	Dilution Factor
	50	0.3768	0.1586	0.495	0.5848	0.0767	0.845	0.1573	0.1397	0.3155	0.2028	0.6502	0.0747	0.6997	0.4286	0.2806	1.0327	0.7188	0.3984	0.5554	0.4294	0.6393	0.5556	0.9581	1.0541	0.0917	0.38	0.6234	0.6922	0.1916	0.2872	0.797	0.6397	0.964	0.9598	0.8613	0.8366	0.8302	0.9926	1.0047	0.9866	0.8364	0.817	0.8486	0.8193	0.8584	0.9842	1.0044	1.0132
	500	0.1467	0.0796	0.2631	0.287	0.0594	0.4388	0.0764	0.0663	0.1245	0.0809	0.2938	0.062	0.3764	0.1198	0.1122	0.8697	0.3667	0.1401	0.2413	0.1473	0.3243	0.1758	0.597	0.7799	0.0715	0.1258	0.281	0.4105	0.0775	0.0936	0.3536	0.2104	0.8446	0.829	0.8172	0.7083	0.7768	0.8977	0.9051	0.9181	0.797	0.8354	0.8145	0.7822	0.8047	0.8374	0.9002	0.8894
	5001	0.0749	0.0653	0.1058	0.1083	0.0593	0.1232	0.0637	0.0604	0.076	0.0658	0.1113	0.0612	0.14	0.0671	0.0649	0.4108	0.1339	0.0723	0.0939	0.0768	0.1231	0.0743	0.1771	0.2712	0.0683	0.0809	0.1029	0.1499	0.0723	0.0669	0.1079	0.0807	0.6428	0.5873	0.5593	0.3782	0.4825	0.5761	0.6064	0.6785	0.5757	0.6981	0.5713	0.5597	0.6126	0.3959	0.6247	0.4701
	50014	0.0701	0.0667	0.0774	0.0784	0.0678	0.0718	0.0588	0.0566	0.0769	0.0726	0.0785	0.068	0.0842	0.0614	0.0602	0.116	0.0912	0.0744	0.0796	0.0686	0.0779	0.0629	0.0761	0.0876	0.068	0.0729	0.0776	0.0889	0.072	0.0645	0.0647	0.0621	0.2976	0.2509	0.2286	0.1536	0.1979	0.17	0.1778	0.2076	0.2495	0.4114	0.2418	0.2522	0.2922	0.1121	0.1781	0.1289
	500180	0.072	0.0712	0.0724	0.077	0.0743	0.0676	0.0581	0.0606	0.076	0.0734	0.0758	0.073	0.0749	0.062	0.0634	0.0682	0.0789	0.0737	0.0784	0.073	0.0812	0.0627	0.0621	0.0657	0.0759	0.0769	0.077	0.0823	0.0781	0.0645	0.0626	0.0618	0.1539	0.1379	0.1261	0.1034	0.1203	0.0777	0.078	0.0831	0.158	0.3845	0.1417	0.1355	0.1804	0.069	0.0774	0.0705
	5002251	0.0752	0.0736	0.0731	0.073	0.0739	0.067	0.061	0.0611	0.0767	0.0767	0.0804	0.0809	0.0756	0.0628	0.062	0.0633	0.0866	0.0773	0.0815	0.0767	0.0841	0.063	0.0632	0.0633	0.081	0.0778	0.0817	0.0792	0.0818	0.0647	0.062	0.0617	0.1443	0.1062	0.0975	0.0878	0.0853	0.0635	0.0655	0.0635	0.107	0.3047	0.1081	0.0927	0.1037	0.0628	0.0617	0.0622
	50027009	0.0737	0.0764	0.0751	0.0743	0.0753	0.0672	0.0538	0.0576	0.0806	0.0794	0.0745	0.0805	0.0851	0.0636	0.0626	0.0643	0.0924	0.078	0.0812	0.0757	0.079	0.0637	0.0627	0.0675	0.0794	0.0802	0.075	0.0783	0.0804	0.0651	0.0615	0.0615	0.0996	0.0851	0.0858	0.0805	0.0795	0.0616	0.0604	0.0631	0.0854	0.157	0.0881	0.0817	0.0861	0.0643	0.061	0.064
2ndary only control (for blank subtraction)		0.0794	0.0792	0.0746	0.0737	0.076	0.0676	0.0674	0.063	0.0796	0.0779	0.0767	0.0792	0.0818	0.0646	0.0655	0.0651	0.0859	0.0791	0.0797	0.0802	0.0794	0.065	0.0685	0.0666	0.08	0.0793	0.0813	0.0898	0.0869	0.0652	0.0613	0.0637	0.0871	0.0917	0.0871	0.0827	0.0809	0.062	0.0613	0.064	0.0868	0.0882	0.0802	0.0898	0.083	0.0614	0.0624	0.063
Background subtracted	Cohort	3mer	3mer	3mer	3mer	3mer	3mer	3mer	3mer	4mer	4mer	4mer	4mer	4mer	4mer	4mer	4mer	5mer	5mer	5mer	5mer	5mer	5mer	5mer	5mer	6mer	6mer	6mer	6mer	6mer	6mer	6mer	6mer	7mer	7mer	7mer	7mer	7mer	7mer	7mer	7mer	8mer	8mer	8mer	8mer	8mer	8mer	8mer	8mer
	Individual Mouse	UL	LL	UR	LR	O	377 = 054	378	379	UL	LL	UR	LR	O	380	381	382	UL	LL	UR	LR	O	383	384 = 053	385 = 052	UL	LL	UR	LR	O	386	387	388	UL	LL	UR	LR	O	389	390 = 055	391 = 056	UL	LL	UR	LR	O	392	393	394
	Dilution Factor
	50	0.2974	0.0794	0.4204	0.5111	0.0007	0.7774	0.0899	0.0767	0.2359	0.1249	0.5735	-0.0045	0.6179	0.364	0.2151	0.9676	0.6329	0.3193	0.4757	0.3492	0.5599	0.4906	0.8896	0.9875	0.0117	0.3007	0.5421	0.6024	0.1047	0.222	0.7357	0.576	0.8769	0.8681	0.7742	0.7539	0.7493	0.9306	0.9434	0.9226	0.7496	0.7288	0.7684	0.7295	0.7754	0.9228	0.942	0.9502
	500	0.0673	0.0004	0.1885	0.2133	-0.0166	0.3712	0.009	0.0033	0.0449	0.003	0.2171	-0.0172	0.2946	0.0552	0.0467	0.8046	0.2808	0.061	0.1616	0.0671	0.2449	0.1108	0.5285	0.7133	-0.0085	0.0465	0.1997	0.3207	-0.0094	0.0284	0.2923	0.1467	0.7575	0.7373	0.7301	0.6256	0.6959	0.8357	0.8438	0.8541	0.7102	0.7472	0.7343	0.6924	0.7217	0.776	0.8378	0.8264
	5001	-0.0045	-0.0139	0.0312	0.0346	-0.0167	0.0556	-0.0037	-0.0026	-0.0036	-0.0121	0.0346	-0.018	0.0582	0.0025	-0.0006	0.3457	0.048	-0.0068	0.0142	-0.0034	0.0437	0.0093	0.1086	0.2046	-0.0117	0.0016	0.0216	0.0601	-0.0146	0.0017	0.0466	0.017	0.5557	0.4956	0.4722	0.2955	0.4016	0.5141	0.5451	0.6145	0.4889	0.6099	0.4911	0.4699	0.5296	0.3345	0.5623	0.4071
	50014	-0.0093	-0.0125	0.0028	0.0047	-0.0082	0.0042	-0.0086	-0.0064	-0.0027	-0.0053	0.0018	-0.0112	0.0024	-0.0032	-0.0053	0.0509	0.0053	-0.0047	-0.0001	-0.0116	-0.0015	-0.0021	0.0076	0.021	-0.012	-0.0064	-0.0037	-0.0009	-0.0149	-0.0007	0.0034	-0.0016	0.2105	0.1592	0.1415	0.0709	0.117	0.108	0.1165	0.1436	0.1627	0.3232	0.1616	0.1624	0.2092	0.0507	0.1157	0.0659
	500180	-0.0074	-0.008	-0.0022	0.0033	-0.0017	0	-0.0093	-0.0024	-0.0036	-0.0045	-0.0009	-0.0062	-0.0069	-0.0026	-0.0021	0.0031	-0.007	-0.0054	-0.0013	-0.0072	0.0018	-0.0023	-0.0064	-0.0009	-0.0041	-0.0024	-0.0043	-0.0075	-0.0088	-0.0007	0.0013	-0.0019	0.0668	0.0462	0.039	0.0207	0.0394	0.0157	0.0167	0.0191	0.0712	0.2963	0.0615	0.0457	0.0974	0.0076	0.015	0.0075
	5002251	-0.0042	-0.0056	-0.0015	-0.0007	-0.0021	-0.0006	-0.0064	-0.0019	-0.0029	-0.0012	0.0037	0.0017	-0.0062	-0.0018	-0.0035	-0.0018	0.0007	-0.0018	0.0018	-0.0035	0.0047	-0.002	-0.0053	-0.0033	0.001	-0.0015	0.0004	-0.0106	-0.0051	-0.0005	0.0007	-0.002	0.0572	0.0145	0.0104	0.0051	0.0044	0.0015	0.0042	-0.0005	0.0202	0.2165	0.0279	0.0029	0.0207	0.0014	-0.0007	-0.0008
	50027009	-0.0057	-0.0028	0.0005	0.0006	-0.0007	-0.0004	-0.0136	-0.0054	0.001	0.0015	-0.0022	0.0013	0.0033	-0.001	-0.0029	-0.0008	0.0065	-0.0011	0.0015	-0.0045	-0.0004	-0.0013	-0.0058	0.0009	-0.0006	0.0009	-0.0063	-0.0115	-0.0065	-0.0001	0.0002	-0.0022	0.0125	-0.0066	-0.0013	-0.0022	-0.0014	-0.0004	-0.0009	-0.0009	-0.0014	0.0688	0.0079	-0.0081	0.0031	0.0029	-0.0014	0.001
Chose y = 0.1 as intersection point for interpolation of Sigmoid
Interpolation (for titers)	Cohort	3mer	3mer	3mer	3mer	3mer	3mer	3mer	3mer	4mer	4mer	4mer	4mer	4mer	4mer	4mer	4mer	5mer	5mer	5mer	5mer	5mer	5mer	5mer	5mer	6mer	6mer	6mer	6mer	6mer	6mer	6mer	6mer	7mer	7mer	7mer	7mer	7mer	7mer	7mer	7mer	8mer	8mer	8mer	8mer	8mer	8mer	8mer	8mer
	Individual Mouse	UL	LL	UR	LR	O	377 = 054	378	379	UL	LL	UR	LR	O	380	381	382	UL	LL	UR	LR	O	383	384 = 053	385 = 052	UL	LL	UR	LR	O	386	387	388	UL	LL	UR	LR	O	389	390 = 055	391 = 056	UL	LL	UR	LR	O	392	393	394
		369.743	50	1266.57	1434.6	412.379	2690.78	50	50	222.35	1428.47	50	2531.53	2101.8	281.346	236.478	26385.4	450.313	841.123	364.047	1781.18	50	558.562	5474.36	11707.2	242.126	1145.89	2835.18	69.7662	250633	144.158	2064.31	787.51	128433	83246	30215.5	60200.6	123231	59839.3	66728.1	78743	50	113575	108211	242369	280493	25378.4	66829.9	34562.8
Log transform of titers	Cohort	3mer	3mer	3mer	3mer	3mer	3mer	3mer	3mer	4mer	4mer	4mer	4mer	4mer	4mer	4mer	4mer	5mer	5mer	5mer	5mer	5mer	5mer	5mer	5mer	6mer	6mer	6mer	6mer	6mer	6mer	6mer	6mer	7mer	7mer	7mer	7mer	7mer	7mer	7mer	7mer	8mer	8mer	8mer	8mer	8mer	8mer	8mer	8mer
	Individual Mouse	UL	LL	UR	LR	O	377 = 054	378	379	UL	LL	UR	LR	O	380	381	382	UL	LL	UR	LR	O	383	384 = 053	385 = 052	UL	LL	UR	LR	O	386	387	388	UL	LL	UR	LR	O	389	390 = 055	391 = 056	UL	LL	UR	LR	O	392	393	394
		2.5679	1.69897	3.10263	3.15673	2.6153	3.42988	1.69897	1.69897	2.34704	3.15487	1.69897	3.40338	3.32259	2.44924	2.37379	4.42136	2.65351	2.92486	2.56116	3.25071	1.69897	2.74707	3.73833	4.06845	2.38404	3.05914	3.45258	1.84365	5.39904	2.15884	3.31478	2.89626	5.10868	4.92036	4.48023	4.7796	5.09072	4.77699	4.82431	4.89621	1.69897	5.05528	5.03427	5.38448	5.44792	4.40446	4.82497	4.53861
[truncated: 15 more columns]

## Sheet: B titers
		Individual Mice from each cohort (
B titers (all) (d42)	Cohort	3mer	3mer	3mer	3mer	3mer	3mer	3mer	3mer	4mer	4mer	4mer	4mer	4mer	4mer	4mer	4mer	5mer	5mer	5mer	5mer	5mer	5mer	5mer	5mer	6mer	6mer	6mer	6mer	6mer	6mer	6mer	6mer	7mer	7mer	7mer	7mer	7mer	7mer	7mer	7mer	8mer	8mer	8mer	8mer	8mer	8mer	8mer	8mer
	Individual Mouse	UL	LL	UR	LR	O	377 = 054	378	379	UL	LL	UR	LR	O	380	381	382	UL	LL	UR	LR	O	383	384 = 053	385 = 052	UL	LL	UR	LR	O	386	387	388	UL	LL	UR	LR	O	389	390 = 055	391 = 056	UL	LL	UR	LR	O	392	393	394
	Dilution Factor
	50	0.1189	0.0817	0.1301	0.1315	0.0862	0.3364	0.2002	0.1408	0.1014	0.1561	0.1196	0.0997	0.1567	0.2078	0.3598	0.2474	0.195	0.2332	0.1655	0.144	0.1396				0.1219	0.1395	0.1357	0.1119	0.1556	0.1912	0.1769	0.1674	0.173	0.1421	0.1346	0.1402	0.1499	0.3884	0.7865	0.8893	0.8809	0.8409	0.7503	0.7961	0.8005	0.7308	0.8918	0.8987
	500	0.0773	0.0641	0.0713	0.0682	0.0638	0.1734	0.0899	0.0699	0.0719	0.1093	0.0972	0.076	0.1057	0.1316	0.1791	0.1199	0.1301	0.1112	0.0995	0.1028	0.1115	0.1578	0.7027	0.9014	0.089	0.1009	0.0985	0.0916	0.1134	0.0956	0.0901	0.0847	0.0971	0.0949	0.0889	0.0894	0.086	0.1522	0.3814	0.3981	0.7618	0.7328	0.4682	0.6014	0.6166	0.2853	0.4969	0.4905
	5001	0.0709	0.0697	0.0652	0.0627	0.0647	0.0846	0.0736	0.0628	0.0665	0.0862	0.0795	0.0771	0.0954	0.0815	0.0902	0.0736	0.0863	0.0758	0.077	0.0806	0.0836	0.0846	0.2562	0.4677	0.0801	0.0807	0.0801	0.094	0.0881	0.0713	0.0677	0.0702	0.0767	0.0926	0.0915	0.0861	0.0848	0.0792	0.1261	0.1195	0.4963	0.4282	0.2011	0.2986	0.3041	0.0974	0.162	0.1588
	50014	0.0866	0.0792	0.081	0.071	0.0791	0.0702	0.0629	0.0626	0.0832	0.0892	0.0908	0.0839	0.09	0.0683	0.0677	0.0651	0.0907	0.0846	0.0878	0.0854	0.0906	0.0675	0.0921	0.1523	0.1015	0.0871	0.098	0.1015	0.1	0.0678	0.064	0.064	0.111	0.1134	0.1043	0.1056	0.1173	0.067	0.0722	0.0695	0.2138	0.1955	0.1556	0.1686	0.1769	0.0682	0.0743	0.0759
	500180	0.1377	0.0971	0.0989	0.0904	0.0893	0.0667	0.0649	0.0644	0.0911	0.0977	0.1217	0.1002	0.1082	0.0654	0.0651	0.0648	0.105	0.0991	0.097	0.0952	0.0903	0.0645	0.0663	0.075	0.0995	0.101	0.1043	0.1148	0.1071	0.0681	0.0654	0.0641	0.1303	0.1292	0.1329	0.1217	0.1198	0.0656	0.066	0.0656	0.1539	0.1907	0.1406	0.1389	0.1387	0.0698	0.0656	0.0663
	5002251	0.4094	0.0964	0.0946	0.0925	0.0939	0.0675	0.0632	0.0667	0.1013	0.1041	0.1091	0.1014	0.1041	0.0665	0.0635	0.0634	0.1277	0.1193	0.1362	0.134	0.1234	0.0648	0.0642	0.0655	0.1201	0.15	0.1322	0.1324	0.1375	0.0693	0.0658	0.0652	0.1289	0.1419	0.1354	0.1315	0.1332	0.0649	0.0648	0.0672	0.1463	0.1775	0.1378	0.1536	0.1345	0.0654	0.0641	0.0648
	50027009	0.0965	0.1056	0.1026	0.0953	0.0987	0.068	0.065	0.0655	0.1036	0.1045	0.0981	0.1087	0.1111	0.0697	0.065	0.065	0.1423	0.1328	0.13	0.1368	0.1355	0.0625	0.0627	0.0639	0.1347	0.1416	0.1487	0.1612	0.1487	0.0694	0.0823	0.0657	0.121	0.1359	0.1253	0.1239	0.1277	0.0658	0.0877	0.0647	0.142	0.1444	0.1429	0.1437	0.1434	0.0657	0.065	0.0654
2ndary only control (for blank subtraction)		0.1155	0.109	0.1086	0.1046	0.1031	0.0698	0.0668	0.0795	0.1055	0.1035	0.1155	0.1069	0.1103	0.0715	0.0671	0.066	0.1516	0.1278	0.1461	0.1284	0.1327	0.0647	0.0636	0.0653	0.1572	0.1346	0.1436	0.1312	0.1298	0.0732	0.0687	0.0705	0.1529	0.1396	0.1437	0.1319	0.1353	0.068	0.069	0.0678	0.1548	0.1466	0.1262	0.1507	0.1391	0.0669	0.0684	0.0675
																							0.0663	0.0671	0.0687
Background subtracted	Cohort	3mer	3mer	3mer	3mer	3mer	3mer	3mer	3mer	4mer	4mer	4mer	4mer	4mer	4mer	4mer	4mer	5mer	5mer	5mer	5mer	5mer	5mer	5mer	5mer	6mer	6mer	6mer	6mer	6mer	6mer	6mer	6mer	7mer	7mer	7mer	7mer	7mer	7mer	7mer	7mer	8mer	8mer	8mer	8mer	8mer	8mer	8mer	8mer
	Individual Mouse	UL	LL	UR	LR	O	377 = 054	378	379	UL	LL	UR	LR	O	380	381	382	UL	LL	UR	LR	O	383	384 = 053	385 = 052	UL	LL	UR	LR	O	386	387	388	UL	LL	UR	LR	O	389	390 = 055	391 = 056	UL	LL	UR	LR	O	392	393	394
	Dilution Factor
	50	0.0034	-0.0273	0.0215	0.0269	-0.0169	0.2666	0.1334	0.0613	-0.0041	0.0526	0.0041	-0.0072	0.0464	0.1363	0.2927	0.1814	0.0434	0.1054	0.0194	0.0156	0.0069	-0.0647	-0.0636	-0.0653	-0.0353	0.0049	-0.0079	-0.0193	0.0258	0.118	0.1082	0.0969	0.0201	0.0025	-0.0091	0.0083	0.0146	0.3204	0.7175	0.8215	0.7261	0.6943	0.6241	0.6454	0.6614	0.6639	0.8234	0.8312
	500	-0.0382	-0.0449	-0.0373	-0.0364	-0.0393	0.1036	0.0231	-0.0096	-0.0336	0.0058	-0.0183	-0.0309	-0.0046	0.0601	0.112	0.0539	-0.0215	-0.0166	-0.0466	-0.0256	-0.0212	0.0931	0.6391	0.8361	-0.0682	-0.0337	-0.0451	-0.0396	-0.0164	0.0224	0.0214	0.0142	-0.0558	-0.0447	-0.0548	-0.0425	-0.0493	0.0842	0.3124	0.3303	0.607	0.5862	0.342	0.4507	0.4775	0.2184	0.4285	0.423
	5001	-0.0446	-0.0393	-0.0434	-0.0419	-0.0384	0.0148	0.0068	-0.0167	-0.039	-0.0173	-0.036	-0.0298	-0.0149	0.01	0.0231	0.0076	-0.0653	-0.052	-0.0691	-0.0478	-0.0491	0.0199	0.1926	0.4024	-0.0771	-0.0539	-0.0635	-0.0372	-0.0417	-0.0019	-0.001	-0.0003	-0.0762	-0.047	-0.0522	-0.0458	-0.0505	0.0112	0.0571	0.0517	0.3415	0.2816	0.0749	0.1479	0.165	0.0305	0.0936	0.0913
	50014	-0.0289	-0.0298	-0.0276	-0.0336	-0.024	0.0004	-0.0039	-0.0169	-0.0223	-0.0143	-0.0247	-0.023	-0.0203	-0.0032	0.0006	-0.0009	-0.0609	-0.0432	-0.0583	-0.043	-0.0421	0.0028	0.0285	0.087	-0.0557	-0.0475	-0.0456	-0.0297	-0.0298	-0.0054	-0.0047	-0.0065	-0.0419	-0.0262	-0.0394	-0.0263	-0.018	-0.001	0.0032	0.0017	0.059	0.0489	0.0294	0.0179	0.0378	0.0013	0.0059	0.0084
	500180	0.0222	-0.0119	-0.0097	-0.0142	-0.0138	-0.0031	-0.0019	-0.0151	-0.0144	-0.0058	0.0062	-0.0067	-0.0021	-0.0061	-0.002	-0.0012	-0.0466	-0.0287	-0.0491	-0.0332	-0.0424	-0.0002	0.0027	0.0097	-0.0577	-0.0336	-0.0393	-0.0164	-0.0227	-0.0051	-0.0033	-0.0064	-0.0226	-0.0104	-0.0108	-0.0102	-0.0155	-0.0024	-0.003	-0.0022	-0.0009	0.0441	0.0144	-0.0118	-0.0004	0.0029	-0.0028	-0.0012
	5002251	0.2939	-0.0126	-0.014	-0.0121	-0.0092	-0.0023	-0.0036	-0.0128	-0.0042	0.0006	-0.0064	-0.0055	-0.0062	-0.005	-0.0036	-0.0026	-0.0239	-0.0085	-0.0099	0.0056	-0.0093	0.0001	0.0006	0.0002	-0.0371	0.0154	-0.0114	0.0012	0.0077	-0.0039	-0.0029	-0.0053	-0.024	0.0023	-0.0083	-0.0004	-0.0021	-0.0031	-0.0042	-0.0006	-0.0085	0.0309	0.0116	0.0029	-0.0046	-0.0015	-0.0043	-0.0027
	50027009	-0.019	-0.0034	-0.006	-0.0093	-0.0044	-0.0018	-0.0018	-0.014	-0.0019	0.001	-0.0174	0.0018	0.0008	-0.0018	-0.0021	-0.001	-0.0093	0.005	-0.0161	0.0084	0.0028	-0.0022	-0.0009	-0.0014	-0.0225	0.007	0.0051	0.03	0.0189	-0.0038	0.0136	-0.0048	-0.0319	-0.0037	-0.0184	-0.008	-0.0076	-0.0022	0.0187	-0.0031	-0.0128	-0.0022	0.0167	-0.007	0.0043	-0.0012	-0.0034	-0.0021
Chose y = 0.1 as intersection point for interpolation of Sigmoid
Interpolation (for titers)	Cohort	3mer	3mer	3mer	3mer	3mer	3mer	3mer	3mer	4mer	4mer	4mer	4mer	4mer	4mer	4mer	4mer	5mer	5mer	5mer	5mer	5mer	5mer	5mer	5mer	6mer	6mer	6mer	6mer	6mer	6mer	6mer	6mer	7mer	7mer	7mer	7mer	7mer	7mer	7mer	7mer	8mer	8mer	8mer	8mer	8mer	8mer	8mer	8mer
	Individual Mouse	UL	LL	UR	LR	O	377 = 054	378	379	UL	LL	UR	LR	O	380	381	382	UL	LL	UR	LR	O	383	384 = 053	385 = 052	UL	LL	UR	LR	O	386	387	388	UL	LL	UR	LR	O	389	390 = 055	391 = 056	UL	LL	UR	LR	O	392	393	394
		50	50	50	50	50	527.524	74.5524	50	50	50	50	50	50	164.906	607.392	191.796	50	289.318	50	50	50	42.5261	1114.81	3956.06	50	50	50	50	50	75.1441	217.316	50	50	50	50	50	33948.2	396.121	2442.35	2381.17	25222.2	3437.03	8458.74	10823.5	10980.8	1333.12	4533.17	4414.81
Log transform of titers	Cohort	3mer	3mer	3mer	3mer	3mer	3mer	3mer	3mer	4mer	4mer	4mer	4mer	4mer	4mer	4mer	4mer	5mer	5mer	5mer	5mer	5mer	5mer	5mer	5mer	6mer	6mer	6mer	6mer	6mer	6mer	6mer	6mer	7mer	7mer	7mer	7mer	7mer	7mer	7mer	7mer	8mer	8mer	8mer	8mer	8mer	8mer	8mer	8mer
	Individual Mouse	UL	LL	UR	LR	O	377 = 054	378	379	UL	LL	UR	LR	O	380	381	382	UL	LL	UR	LR	O	383	384 = 053	385 = 052	UL	LL	UR	LR	O	386	387	388	UL	LL	UR	LR	O	389	390 = 055	391 = 056	UL	LL	UR	LR	O	392	393	394
		1.69897	1.69897	1.69897	1.69897	1.69897	2.72224	1.87246	1.69897	1.69897	1.69897	1.69897	1.69897	1.69897	2.21724	2.78347	2.28284	1.69897	2.46137	1.69897	1.69897	1.69897	1.62866	3.0472	3.59726	1.69897	1.69897	1.69897	1.69897	1.69897	1.87589	2.33709	1.69897	1.69897	1.69897	1.69897	1.69897	4.53082	2.59783	3.38781	3.37679	4.40178	3.53618	3.92731	4.03437	4.04063	3.12487	3.6564	3.64491
[truncated: 15 more columns]

## Sheet: H3HK68 titers
		Individual Mice from each cohort (
H3HK68 titers (all) (d42)	Cohort	3mer	3mer	3mer	3mer	3mer	4mer	4mer	4mer	4mer	4mer	5mer	5mer	5mer	5mer	5mer	6mer	6mer	6mer	6mer	6mer	7mer	7mer	7mer	7mer	7mer	8mer	8mer	8mer	8mer	8mer	Mix	Mix	Mix	Mix	Mix	NP	NP	NP	NP	NP	BOAS NP	BOAS NP	BOAS NP	BOAS NP	BOAS NP
	Individual Mouse	UL	LL	UR	LR	O	UL	LL	UR	LR	O	UL	LL	UR	LR	O	UL	LL	UR	LR	O	UL	LL	UR	LR	O	UL	LL	UR	LR	O	UL	LL	UR	LR	O	UL	LL	UR	LR	O	UL	LL	UR	LR	O
	Dilution Factor
	50	1.0673	0.8223	0.7625	0.6642	0.5449	1.0164	0.9392	0.9266	1.01	1.0674	1.0223	0.9994	1.0404	1.0011	0.8538	0.9803	0.9585	0.9155	0.9894	0.9285	0.9641	0.9786	0.9616	0.8562	0.9416	0.9609	0.9256	0.9914	1.0176	0.9535	0.6413	0.9684	0.6061	0.7135	0.7852	0.9854	0.9409	0.9857	0.783	0.9405	0.0895	0.0849	0.0751	0.1022	0.0857
	500	0.7806	0.4517	0.3765	0.3749	0.1216	0.8397	0.7535	0.6314	0.8968	0.9615	0.8524	0.8853	0.819	0.846	0.6842	0.7071	0.6454	0.6842	0.825	0.5395	0.6467	0.6829	0.7551	0.5352	0.7462	0.7065	0.7536	0.76	0.8399	0.6845	0.2872	0.6216	0.413	0.2796	0.4743	0.8126	0.6021	0.8168	0.389	0.6029	0.0544	0.0585	0.0501	0.0621	0.0538
	5001	0.2963	0.143	0.1064	0.1107	0.066	0.3641	0.3577	0.2752	0.5615	0.6633	0.4675	0.4409	0.2774	0.389	0.3311	0.2499	0.2181	0.2482	0.3815	0.1576	0.4045	0.2152	0.2795	0.149	0.2861	0.2372	0.3249	0.4008	0.4234	0.2469	0.088	0.1846	0.1443	0.0874	0.1399	0.3399	0.1979	0.3269	0.0978	0.2128	0.0535	0.0568	0.049	0.0547	0.0489
	50014	0.084	0.0646	0.0566	0.0562	0.0525	0.0923	0.1054	0.081	0.1361	0.1962	0.1207	0.1354	0.0968	0.1088	0.1111	0.0766	0.0843	0.0712	0.0977	0.0606	0.0978	0.0673	0.0805	0.0586	0.0737	0.0676	0.1005	0.1209	0.1226	0.0776	0.0555	0.0616	0.059	0.0517	0.0657	0.092	0.0649	0.0913	0.0553	0.0811	0.0541	0.0568	0.0487	0.0541	0.0481
	500180	0.0575	0.0572	0.052	0.0506	0.0507	0.0561	0.0594	0.0544	0.0634	0.081	0.0657	0.0696	0.0584	0.0601	0.0609	0.0546	0.0549	0.0511	0.0556	0.0505	0.0604	0.0529	0.0536	0.0494	0.0523	0.0502	0.06	0.0613	0.0614	0.0525	0.0515	0.0518	0.0496	0.0493	0.0572	0.0566	0.0509	0.0554	0.0498	0.0516	0.0517	0.0539	0.0491	0.0535	0.0475
	5002251	0.0547	0.054	0.0509	0.0487	0.0497	0.0512	0.0508	0.0516	0.0535	0.0567	0.0541	0.056	0.0509	0.0515	0.0512	0.0482	0.048	0.049	0.0501	0.0482	0.0536	0.0484	0.0502	0.048	0.05	0.0483	0.053	0.0524	0.052	0.0522	0.0506	0.0493	0.0485	0.0472	0.0487	0.0509	0.0487	0.0507	0.0481	0.0489	0.0502	0.0527	0.0481	0.0531	0.0485
	50027009	0.0611	0.0609	0.057	0.0566	0.056	0.0582	0.0594	0.0568	0.0603	0.0666	0.0535	0.0519	0.0632	0.0511	0.0502	0.0484	0.049	0.0492	0.0497	0.05	0.0532	0.0488	0.0499	0.0483	0.0484	0.0476	0.0508	0.0492	0.0446	0.0497	0.0517	0.0489	0.0501	0.0542	0.0482	0.0496	0.0488	0.0501	0.0485	0.0488	0.0571	0.0587	0.0524	0.0551	0.049
2ndary only control (for blank subtraction)		0.0592	0.0603	0.0578	0.0577	0.0618	0.0583	0.0615	0.0611	0.0592	0.0593	0.0508	0.049	0.05	0.0494	0.0495	0.0495	0.0497	0.0506	0.0504	0.0525	0.0529	0.0496	0.0488	0.0492	0.0498	0.0494	0.0506	0.0554	0.0495	0.0509	0.0522	0.0496	0.0505	0.0501	0.0502	0.0513	0.0518	0.0513	0.0504	0.0516	0.0593	0.0618	0.0553	0.0669	0.0532
Background subtracted	Cohort	3mer	3mer	3mer	3mer	3mer	4mer	4mer	4mer	4mer	4mer	5mer	5mer	5mer	5mer	5mer	6mer	6mer	6mer	6mer	6mer	7mer	7mer	7mer	7mer	7mer	8mer	8mer	8mer	8mer	8mer	Mix	Mix	Mix	Mix	Mix	NP	NP	NP	NP	NP	BOAS NP	BOAS NP	BOAS NP	BOAS NP	BOAS NP
	Individual Mouse	UL	LL	UR	LR	O	UL	LL	UR	LR	O	UL	LL	UR	LR	O	UL	LL	UR	LR	O	UL	LL	UR	LR	O	UL	LL	UR	LR	O	UL	LL	UR	LR	O	UL	LL	UR	LR	O	UL	LL	UR	LR	O
	Dilution Factor
	50	1.0081	0.762	0.7047	0.6065	0.4831	0.9581	0.8777	0.8655	0.9508	1.0081	0.9715	0.9504	0.9904	0.9517	0.8043	0.9308	0.9088	0.8649	0.939	0.876	0.9112	0.929	0.9128	0.807	0.8918	0.9115	0.875	0.936	0.9681	0.9026	0.5891	0.9188	0.5556	0.6634	0.735	0.9341	0.8891	0.9344	0.7326	0.8889	0.0302	0.0231	0.0198	0.0353	0.0325
	500	0.7214	0.3914	0.3187	0.3172	0.0598	0.7814	0.692	0.5703	0.8376	0.9022	0.8016	0.8363	0.769	0.7966	0.6347	0.6576	0.5957	0.6336	0.7746	0.487	0.5938	0.6333	0.7063	0.486	0.6964	0.6571	0.703	0.7046	0.7904	0.6336	0.235	0.572	0.3625	0.2295	0.4241	0.7613	0.5503	0.7655	0.3386	0.5513	-0.0049	-0.0033	-0.0052	-0.0048	0.0006
	5001	0.2371	0.0827	0.0486	0.053	0.0042	0.3058	0.2962	0.2141	0.5023	0.604	0.4167	0.3919	0.2274	0.3396	0.2816	0.2004	0.1684	0.1976	0.3311	0.1051	0.3516	0.1656	0.2307	0.0998	0.2363	0.1878	0.2743	0.3454	0.3739	0.196	0.0358	0.135	0.0938	0.0373	0.0897	0.2886	0.1461	0.2756	0.0474	0.1612	-0.0058	-0.005	-0.0063	-0.0122	-0.0043
	50014	0.0248	0.0043	-0.0012	-0.0015	-0.0093	0.034	0.0439	0.0199	0.0769	0.1369	0.0699	0.0864	0.0468	0.0594	0.0616	0.0271	0.0346	0.0206	0.0473	0.0081	0.0449	0.0177	0.0317	0.0094	0.0239	0.0182	0.0499	0.0655	0.0731	0.0267	0.0033	0.012	0.0085	0.0016	0.0155	0.0407	0.0131	0.04	0.0049	0.0295	-0.0052	-0.005	-0.0066	-0.0128	-0.0051
	500180	-0.0017	-0.0031	-0.0058	-0.0071	-0.0111	-0.0022	-0.0021	-0.0067	0.0042	0.0217	0.0149	0.0206	0.0084	0.0107	0.0114	0.0051	0.0052	0.0005	0.0052	-0.002	0.0075	0.0033	0.0048	0.0002	0.0025	0.0008	0.0094	0.0059	0.0119	0.0016	-0.0007	0.0022	-0.0009	-0.0008	0.007	0.0053	-0.0009	0.0041	-0.0006	0	-0.0076	-0.0079	-0.0062	-0.0134	-0.0057
	5002251	-0.0045	-0.0063	-0.0069	-0.009	-0.0121	-0.0071	-0.0107	-0.0095	-0.0057	-0.0026	0.0033	0.007	0.0009	0.0021	0.0017	-0.0013	-0.0017	-0.0016	-0.0003	-0.0043	0.0007	-0.0012	0.0014	-0.0012	0.0002	-0.0011	0.0024	-0.003	0.0025	0.0013	-0.0016	-0.0003	-0.002	-0.0029	-0.0015	-0.0004	-0.0031	-0.0006	-0.0023	-0.0027	-0.0091	-0.0091	-0.0072	-0.0138	-0.0047
	50027009	0.0019	0.0006	-0.0008	-0.0011	-0.0058	-0.0001	-0.0021	-0.0043	0.0011	0.0073	0.0027	0.0029	0.0132	0.0017	0.0007	-0.0011	-0.0007	-0.0014	-0.0007	-0.0025	0.0003	-0.0008	0.0011	-0.0009	-0.0014	-0.0018	0.0002	-0.0062	-0.0049	-0.0012	-0.0005	-0.0007	-0.0004	0.0041	-0.002	-0.0017	-0.003	-0.0012	-0.0019	-0.0028	-0.0022	-0.0031	-0.0029	-0.0118	-0.0042
Chose y = 0.1 as intersection point for interpolation of Sigmoid
Interpolation (for titers)	Cohort	3mer	3mer	3mer	3mer	3mer	4mer	4mer	4mer	4mer	4mer	5mer	5mer	5mer	5mer	5mer	6mer	6mer	6mer	6mer	6mer	7mer	7mer	7mer	7mer	7mer	8mer	8mer	8mer	8mer	8mer	Mix	Mix	Mix	Mix	Mix	NP	NP	NP	NP	NP	BOAS NP	BOAS NP	BOAS NP	BOAS NP	BOAS NP
	Individual Mouse	UL	LL	UR	LR	O	UL	LL	UR	LR	O	UL	LL	UR	LR	O	UL	LL	UR	LR	O	UL	LL	UR	LR	O	UL	LL	UR	LR	O	UL	LL	UR	LR	O	UL	LL	UR	LR	O	UL	LL	UR	LR	O
		15149.2	3890.39	2308.95	2520.98	295.669	20334	23427.2	14659.2	46137.7	80829.3	43618.9	36714.6	13855.6	27069.4	26504.8	12288.8	10326.1	11661.9	25225.4	5256.4	46344.9	9118.56	14226.6	4976.13	14358.5	10591	20518.2	38468.6	37629.3	12074	1569.74	7080.57	4550.56	1521.56	4444.31	19521.8	7976.88	17626.9	2334.44	9879.83	50	50	50	50	50
Log transform of titers	Cohort	3mer	3mer	3mer	3mer	3mer	4mer	4mer	4mer	4mer	4mer	5mer	5mer	5mer	5mer	5mer	6mer	6mer	6mer	6mer	6mer	7mer	7mer	7mer	7mer	7mer	8mer	8mer	8mer	8mer	8mer	Mix	Mix	Mix	Mix	Mix	NP	NP	NP	NP	NP	BOAS NP	BOAS NP	BOAS NP	BOAS NP	BOAS NP
	Individual Mouse	UL	LL	UR	LR	O	UL	LL	UR	LR	O	UL	LL	UR	LR	O	UL	LL	UR	LR	O	UL	LL	UR	LR	O	UL	LL	UR	LR	O	UL	LL	UR	LR	O	UL	LL	UR	LR	O	UL	LL	UR	LR	O
		4.18039	3.58999	3.36342	3.40157	2.47081	4.30822	4.36972	4.16611	4.66406	4.90757	4.63967	4.56484	4.14162	4.43248	4.42332	4.08951	4.01394	4.06677	4.40184	3.72069	4.666	3.95993	4.1531	3.69689	4.15711	4.02494	4.31214	4.58511	4.57553	4.08185	3.19583	3.85007	3.65806	3.18229	3.6478	4.29052	3.90183	4.24618	3.36818	3.99475	1.69897	1.69897	1.69897	1.69897	1.69897

[truncated: 1 more sheets: H1SI06 titers]
