# Supplementary material for: A modular platform to display multiple hemagglutinin subtypes on a single immunogen
Source: eLife. 2025 Dec 8;13:RP97364. doi: 10.7554/eLife.97364 (PMC12685301; doi:10.7554/eLife.97364)
Supplement: Figure 7—source data 1. [file elife-97364-fig7-data1.xlsx]

## Sheet: Normalized Neuts H1
Group-mouse	3mer-UR	3mer-LR	3mer-UL	3mer-LL	3mer-O	4mer-UR	4mer-LR	4mer-UL	4mer-LL	4mer-O	5mer-UR	5mer-LR	5mer-UL	5mer-LL	5mer-O	6mer-UR	6mer-LR	6mer-UL	6mer-LL	6mer-O	7mer-UR	7mer-LR	7mer-UL	7mer-LL	7mer-O	8mer-UR	8mer-LR	8mer-UL	8mer-LL	8mer-O	Mix-UR	Mix-LR	Mix-UL	Mix-LL	Mix-O	BOAS NP-UR	BOAS NP-LR	BOAS NP-UL	BOAS NP-LL	BOAS NP-O	NP-UR	NP-LR	NP-UL	NP-LL	NP-O	PB	5J8
Dilution
32	98.8077	99.9775	-81.6962	99.9775	99.7975	81.3512	30.3764	92.689	95.748	100	99.4882	100	100	99.9606	93.0315	-37.7559	98.6532	91.4141	-69.0657	-73.9899	63.8889	-93.3081	-85.4377	94.3603	5.65123	99.5846	99.8442	96.4691	99.325	99.9481	-72.0294	-76.2354	-44.8179	-61.9276	-58.59	-78.7212	100	-18.7844	-64.5275	76.8123	-51.4673	-58.119	-68.4226	-65.0315	-54.5975	-56.6408	100
64	85.1755	100.022	-117.734	100.022	100.022	22.0531	-61.5402	73.9727	79.3701	100	94.8425	100	100	100	55	-52.6772	84.638	59.133	-112.205	-65.5724	7.15488	-115.362	-82.5337	58.4175	-37.9662	92.7304	97.9749	82.0857	93.9766	99.9481	-123.176	-121.151	-77.1753	-74.8917	-68.3921	-56.8334	100	-56.201	-84.3776	22.9535	-94.812	-101.551	-109.028	-101.985	-98.4639	-117.071	100
128	26.7771	99.9325	-125.067	100.022	100.022	-70.8083	-96.0483	54.5366	22.2835	100	82.5984	99.8031	99.8819	99.5669	33.1496	-25.5906	42.0875	23.1061	-115.741	-106.65	-65.2778	-119.907	-92.8451	-0.0420875	-58.1134	47.1398	82.8646	7.57248	53.942	99.5327	-103.444	-103.6	-75.3133	-85.5018	-55.8848	-80.4778	99.9649	-83.6749	-81.9534	-23.1409	-119.767	-141.635	-124.549	-122.071	-126.679	-110.985	100
256	-29.6416	99.3476	-117.914	100.022	100.022	-98.5228	-106.621	10.8053	-41.5748	100	56.2598	99.2126	98.6614	96.8898	-12.7559	-41.8504	-15.9933	16.7929	-95.9596	-86.1111	-83.2492	-103.577	-98.4848	-49.537	-62.1116	-6.1878	46.6205	-65.9022	-42.5357	96.7287	-107.91	-79.2471	-67.0219	-66.1787	-85.0451	-74.0485	99.9297	-67.584	-92.2825	-60.3818	-107.115	-114.593	-134.07	-111.811	-119.68	-91.1166	100
512	-46.7382	98.1329	-79.4916	98.1329	100.022	-85.9703	-67.299	27.587	-57.4803	100	0.944882	97.2441	92.2835	78.7008	-40.5906	-25.0787	-35.3114	-11.4899	-78.4091	-72.0539	-78.9141	-76.9781	-77.0623	-51.3468	-48.9745	-53.1804	-15.3786	-62.6309	-55.4132	89.8745	-68.4466	-59.4115	-47.4529	-49.7014	-67.5489	-63.3329	99.8595	-60.8385	-80.3373	-65.7922	-103.072	-108.724	-109.941	-89.4211	-105.985	-95.6815	100
1024	-47.638	88.1449	-60.0555	83.6008	99.6626	-52.587	-41.6992	35.2804	-64.7638	99.8425	-15.4331	78.8976	55.7087	36.0236	-51.9685	-20.0394	-42.9714	-3.82997	-40.1515	-40.867	-56.0606	-59.5539	-42.1717	-39.4781	-24.7252	-55.6209	-68.3427	-78.7797	-81.8434	48.1783	-88.1264	-74.2622	-19.5573	-11.3714	-37.1589	-50.5446	97.6812	-47.8393	-74.6809	-62.0682	-59.5102	-80.2913	-80.6826	-80.3348	-94.4207	-56.7712	100
2048	-14.7496	71.9931	-46.6032	50.8923	97.9979	-48.0429	-51.4172	27.9019	-70.1181	96.7717	-37.2441	37.4016	10.5118	-14.0551	-43.622	-6.06299	-42.7189	-26.3468	-40.1094	-43.8131	-54.2929	-51.4731	-22.8114	-28.8721	-27.2177	-70.939	-62.579	-64.3964	-63.5656	-17.2479	-71.3025	-41.4453	-16.4305	-13.8307	-8.87692	-18.7844	91.533	-36.2455	-46.2232	-20.7167	-41.2506	-56.9451	-46.4676	-43.0766	-66.4662	-49.1196	100
4096	-53.2169	8.64577	-46.5132	-8.31584	77.437	-36.7951	-20.5984	32.671	-35.9449	80.1575	-13.2677	12.4016	-0.669291	-4.52756	-17.6772	8.22835	-10.3956	-3.95623	-27.3148	-24.4949	-26.4731	-21.8434	-12.8367	-15.362	2.17222	-30.0736	-18.598	-19.273	-36.1489	-28.1523	-37.2912	-16.4171	-17.7304	-24.23	-16.9224	-22.6139	70.7694	-32.9078	-26.865	-2.86919	-38.2074	-45.1199	-47.1632	-48.8153	-54.2497	-29.8167	99.6087
8192	-32.7909	-19.4286	-37.0651	-21.5432	41.9391	-36.4802	-30.4514	29.8815	-14.9213	41.2992	-13.3071	-5.03937	-12.4803	-20.9449	-14.8425	-0.0393701	-9.34343	0.841751	-7.07071	-5.76599	-3.57744	-0.378788	-11.9949	7.40741	-11.5361	-52.765	-32.566	-27.685	-22.9078	-22.3367	-26.5945	12.8689	-18.0115	-18.2574	-6.34735	-12.4253	45.5791	-21.1383	-23.1409	-2.58813	-23.2085	-32.7295	-19.3392	-30.208	-34.1642	-25.1648	99.913
16384	-15.7394	-14.4796	-3.36683	-15.6494	9.54559	-19.8335	-22.308	15.2145	-1.29921	18.937	-6.92913	-4.80315	-0.0787402	-17.5591	-12.0079	0.669291	0.799663	5.09259	-25.8418	-9.63805	-4.50337	-15.4882	-12.6263	1.64141	-9.82259	2.37992	-6.08395	-1.20294	-27.01	-26.5426	-23.0117	-8.836	-3.74751	5.56271	6.6167	7.60042	28.8558	-7.12027	-7.99859	2.64668	-28.9037	-39.4247	-39.5551	-33.5121	-41.1202	-34.2511	99.2174
32768	14.4496	-2.0171	-4.40162	-11.4652	-0.397421	-2.24205	-2.10708	9.09568	-5.90551	6.02362	-6.81102	-2.32283	-5.62992	-2.32283	0.314961	9.84252	0.294613	-5.51347	-14.8148	-3.82997	-4.50337	-16.7088	-8.96465	-5.68182	-21.1943	-11.7958	-7.64171	-3.90307	-21.2462	-23.1155	-0.735612	-8.52445	-0.655814	0.011711	-2.30706	-8.45532	18.2106	-1.74494	-1.99087	21.3374	-2.51431	-27.1647	-20.3391	-18.6436	-35.8597	-21.9912	91.0007
Sigmoidal, 4PL, X is concentration			Not converged																Not converged	Not converged		Interrupted	Not converged		Not converged										Interrupted			Not converged			Interrupted				Not converged	Not converged
Best-fit values
Bottom	-28.77	-12.45		-17.54	-3.152	-50.16	-57	23.58	-37	6.132	-16.2	-4.222	-5.379	-13.26	-25.84	-127.9	-20.39	-5.879			-35.62	-202		-22.21		-38.55	-32.27	-40.39	-44.16	-25.63	-108.8	-141.1	-104.9	-155.8	-164.7	-105.3	16.26		-89.25	-24.15	-186.2	Unstable	-120.3	Unstable			-1231
Top	= 100.0	= 100.0		= 100.0	= 100.0	= 100.0	= 100.0	= 100.0	= 100.0	= 100.0	= 100.0	= 100.0	= 100.0	= 100.0	= 100.0	= 100.0	= 100.0	= 100.0			= 100.0	= 100.0		= 100.0		= 100.0	= 100.0	= 100.0	= 100.0	= 100.0	= 100.0	= 100.0	= 100.0	= 100.0	= 100.0	= 100.0	= 100.0		= 100.0	= 100.0	= 100.0	= 100.0	= 100.0	= 100.0			= 100.0
IC50	117.1	2715	32	2173	7279	63.24	65999	89.63	114.4	6868	289.4	1790	1147	891.7	100.8	1526	127	85.12	32	32	56	32	32	65	32	154.8	279.4	107.7	142.9	1107	32	32	32	32	32	17649	5928	32	29869	53.08	32	32	32	32	32		Unstable
HillSlope	-4.045	-3.635		-3.259	-2.393	-7.941	0.8002	-2.533	-3.749	-2.486	-2.831	-2.41	-2.997	-3.045	-2.172	0.1522	-3.717	-1.974			1.07	-0.0005484		-3.732		-3.072	-3.539	-4.667	-6.817	-3.877	0.536	0.3295	0.246	0.2037	-0.0001913	0.3116	-1.882		0.5485	-3.44	-0.001907	Unstable	0.4592	Unstable			-3.511
logIC50	2.069	3.434		3.337	3.862	1.801	4.82	1.952	2.058	3.837	2.462	3.253	3.06	2.95	2.003	3.184	2.104	1.93			4.864	-104.5		1.889		2.19	2.446	2.032	2.155	3.044	4.4	3.809	4.263	3.306	-133.7	4.247	3.773		4.475	1.725	-53.3	Unstable	4.481	Unstable			Unstable
Span	128.8	112.4		117.5	103.2	150.2	157	76.42	137	93.87	116.2	104.2	105.4	113.3	125.8	227.9	120.4	105.9			135.6	302		122.2		138.5	132.3	140.4	144.2	125.6	208.8	241.1	204.9	255.8	264.7	205.3	83.74		189.3	124.2	286.2	Unstable	220.3	Unstable			1331
log transform of IC50	2.06856	3.43377	1.50515	3.33706	3.86207	1.80099	4.81954	1.95245	2.05843	3.83683	2.4615	3.25285	3.05956	2.95022	2.00346	3.18355	2.1038	1.93003	1.50515	1.50515	1.74819	1.50515	1.50515	1.81291	1.50515	2.18977	2.44623	2.03222	2.15503	3.04415	1.50515	1.50515	1.50515	1.50515	1.50515	4.24672	3.77291	1.50515	4.47522	1.72493	1.50515	1.50515	1.50515	1.50515	1.50515
** if didn't converge, set limit of detection

## Sheet: Normalized Neuts H3
Group-mouse	3mer-UR	3mer-LR	3mer-UL	3mer-LL	3mer-O	4mer-UR	4mer-LR	4mer-UL	4mer-LL	4mer-O	5mer-UR	5mer-LR	5mer-UL	5mer-LL	5mer-O	6mer-UR	6mer-LR	6mer-UL	6mer-LL	6mer-O	7mer-UR	7mer-LR	7mer-UL	7mer-LL	7mer-O	8mer-UR	8mer-LR	8mer-UL	8mer-LL	8mer-O	Mix-UR	Mix-LR	Mix-UL	Mix-LL	Mix-O	BOAS NP-UR	BOAS NP-LR	BOAS NP-UL	BOAS NP-LL	BOAS NP-O	NP-UR	NP-LR	NP-UL	NP-LL	NP-O	PB	F045-092
Dilution
32	100	99.9838	99.7411	95.5817	99.7734	100	99.2717	99.9514	99.9342	89.383	99.9671	100	100.033	98.535	100.033	100.033	99.4674	98.3734	85.2307	55.7496	99.8129	98.3734	70.7637	99.2515	100.01	99.8756	99.9904	98.1526	99.9904	99.6267	-5.74328	21.5947	98.38	10.6385	17.1706	92.1251	99.5582	97.4963	98.224	99.4542	17.9887	13.9518	24.1665	20.1133	25.4576	17.9396	100
64	100	100	98.8024	85.5312	98.8024	100	98.1226	99.822	99.4897	66.6347	99.7366	99.9835	100.033	94.4857	100.016	99.7202	98.9636	100	76.752	36.6906	99.3666	97.0922	29.637	95.7391	100.01	98.2866	98.7078	91.3947	99.799	97.9611	-35.3403	9.72528	95.4691	-13.3587	-18.3834	77.7094	98.38	87.239	93.182	97.1498	4.08041	-13.3253	-4.4672	-3.51929	13.6577	10.9283	99.9673
128	99.9838	99.9838	94.8534	52.4991	91.6327	100	94.0118	98.6567	97.0042	31.113	98.6832	99.4897	99.9506	77.0047	99.8189	100.033	95.1345	99.8848	52.0213	-1.7298	95.7823	80.0773	-5.65965	85.9216	99.9713	87.987	95.5872	66.2965	98.5163	86.8958	-33.2919	-0.746626	79.1995	-37.7198	-47.2321	46.4697	91.6226	60.3656	88.6944	93.5805	-9.82785	-38.6086	-22.8209	-28.9987	-22.7065	-19.1436	99.8693
256	100	99.9353	81.7603	11.9737	72.422	100	76.7432	94.1898	89.169	9.96132	93.4158	98.4198	99.5556	57.5814	99.1605	100.033	88.34	99.9856	14.7237	-17.3772	88.6999	57.7937	-25.3377	62.2706	99.9904	56.4947	84.2921	19.1443	93.9791	70.872	-30.9945	-1.66555	49.1207	-35.6406	-52.3954	14.433	80.1351	25.8338	64.8185	85.0212	-4.32011	-27.0375	-27.7239	-26.7596	-24.8638	-22.968	99.9183
512	99.9353	99.563	51.9812	-3.14245	35.7808	99.8705	47.1907	83.8319	75.0789	-3.71732	81.2515	93.3006	97.9918	26.4053	97.712	100.033	72.5774	99.6689	-0.549411	-18.4137	69.9431	25.0018	-23.1352	42.3334	99.7416	19.106	58.8111	-1.83785	79.3912	25.8447	-33.9045	2.01015	27.0987	-36.9921	-44.6504	-13.2894	50.5241	-4.29698	44.1826	69.3407	-8.09545	-24.5042	-17.3622	-22.1671	-23.1641	-15.8259	99.951
1024	99.4012	98.0579	26.0216	-3.22337	12.2812	98.6891	6.81089	59.0699	50.2071	-14.2355	63.7212	80.2639	94.601	3.73927	91.0291	100.033	50.1068	97.5672	-7.05597	-18.025	43.7442	10.6643	-15.2468	23.6918	97.5974	-2.46961	26.802	-23.3177	52.8381	6.39418	-24.4089	-5.34125	13.3068	-27.861	-31.7942	-9.09642	17.5691	2.07918	26.4056	46.1752	-7.76858	-19.4541	-16.545	-24.161	-7.85029	-18.0486	99.9673
2048	95.3389	90.6293	1.25968	-8.09484	-0.342567	90.953	-3.57942	35.7969	27.9691	-17.0009	24.4959	47.6228	78.9142	-15.1738	72.2971	99.6379	34.7185	91.5213	-11.0434	-8.7114	19.762	-5.77481	-20.976	15.7314	88.9633	-2.08672	5.11152	-7.42797	8.97865	-12.3098	-21.0204	7.88743	6.30685	-23.2522	-31.9328	-16.7201	-2.91086	-14.6756	7.25981	32.2447	1.02419	-21.5788	-21.5134	-20.0915	-7.7032	-28.4267	99.7222
4096	79.9477	70.2857	-17.5303	-30.5101	-16.7696	67.8418	-7.64168	19.3052	18.2903	-16.3096	3.6405	4.266	54.6185	-12.0298	36.2157	98.7655	24.5412	81.6751	-16.6287	-27.6121	1.39392	-12.2382	-22.8617	5.38135	66.622	1.56983	5.6667	-17.3064	-0.823203	-15.0091	-15.0857	6.08787	15.6805	-22.5418	-18.8513	-14.2597	-21.7621	-19.0765	-2.09651	17.6211	8.01918	-13.3417	-14.4857	-19.2907	-23.2785	-13.4888	99.526
8192	47.3363	30.6989	-12.1247	-2.73784	-9.79419	34.1785	2.68389	8.10563	2.89978	-19.47	-9.74185	-0.0301775	31.541	-8.68838	8.69386	94.782	7.20952	54.2957	-18.4425	-25.5968	-12.7708	-19.2198	-23.4519	5.91397	39.9541	-30.7265	-23.8729	-28.1995	-19.6803	-51.5938	-32.7175	-4.17345	5.18063	-29.9922	-27.4279	-25.0715	-20.0814	-28.2249	-10.5345	11.834	-2.68577	-14.2569	-16.071	-11.2497	-17.6073	-18.5062	99.3299
16384	19.8716	1.98797	-18.8412	-11.4612	-12.5455	2.89429	-7.67405	1.77757	-4.34282	-11.0258	2.37305	0.381334	22.2244	-12.5566	3.44298	77.2352	3.81229	25.9951	-22.0556	-21.3647	-11.7344	-21.048	-24.7475	-6.72489	19.7186	-15.7366	2.08672	-23.222	-22.8199	-26.4191	-44.2998	-8.0023	7.41575	-18.4527	-26.4749	-9.65087	-16.7721	-12.631	-15.6458	5.12865	1.79233	-23.2131	-14.1425	-15.1722	-9.30486	-12.5899	98.8886
32768	8.59116	-6.31457	-16.98	-13.3224	-17.2551	-1.55639	-26.9981	1.32441	6.01081	-8.12872	-5.74195	-9.676	-5.05062	-11.5854	-10.0875	55.1288	-7.28629	9.69986	-14.4406	-21.2639	-18.3705	-18.9607	-15.7074	6.46098	7.10252	-22.035	12.6161	-42.0408	-22.9157	-35.7423	-22.7625	-0.153154	-0.848999	-20.0641	-21.277	-19.7003	-26.9601	-16.3909	-13.9998	3.37867	-2.04838	-14.1752	-14.453	-13.783	-20.0098	-18.9148	97.5648
Sigmoidal, 4PL, X is concentration
Best-fit values
Bottom	5.564	-9.784	-18.12	-11.89	-13.85	-6.227	-10.64	1.025	0.1963	-14.36	-5.782	-5.419	-11.03	-13.18	-7.048	45.56	-6.019	0.08792	-16.99	-21.5	-17.41	-18.91	-21.77	2.019	3.457	-15.34	-1.83	-24.36	-22.69	-34.59	-29.38	-0.6947	6.51	-27.76	-33.2	-17.09	-23.01	-17.01	-15.33	3.499	-2.463	-21.48	-18.28	-19.94	-17.42	-19.3	-43188
Top	= 100.0	= 100.0	= 100.0	= 100.0	= 100.0	= 100.0	= 100.0	= 100.0	= 100.0	= 100.0	= 100.0	= 100.0	= 100.0	= 100.0	= 100.0	= 100.0	= 100.0	= 100.0	= 100.0	= 100.0	= 100.0	= 100.0	= 100.0	= 100.0	= 100.0	= 100.0	= 100.0	= 100.0	= 100.0	= 100.0	= 100.0	= 100.0	= 100.0	= 100.0	= 100.0	= 100.0	= 100.0	= 100.0	= 100.0	= 100.0	= 100.0	= 100.0	= 100.0	= 100.0	= 100.0	= 100.0	= 100.0
IC50	7414	6389	701.2	147.2	479.9	6242	508.8	1384	1081	107.6	1310	1950	6131	338.6	3435	18525	1381	9088	151.3	51.17	1138	398.8	54.59	404.3	6156	344.2	620.9	204.6	1284	547.3	30.29	15.6	245.8	23.28	27.37	140.8	668.7	190.3	591.1	946.3	19.35	24.82	25.79	24.49	25.28	20.22	Unstable
HillSlope	-2.225	-2.184	-1.625	-2.168	-1.738	-2.126	-2.055	-1.521	-1.442	-1.69	-1.951	-2.43	-1.307	-1.647	-1.953	-2.711	-1.081	-1.762	-1.487	-1.56	-1.39	-1.403	-2.293	-1.381	-1.761	-1.883	-1.997	-1.979	-1.757	-1.426	-27.23	-1.712	-1.876	-2.553	-3.023	-1.85	-1.637	-1.765	-1.17	-1.235	-2.722	-3.441	-2.579	-2.427	-1.773	-1.421	-0.9162
logIC50	3.87	3.805	2.846	2.168	2.681	3.795	2.707	3.141	3.034	2.032	3.117	3.29	3.788	2.53	3.536	4.268	3.14	3.958	2.18	1.709	3.056	2.601	1.737	2.607	3.789	2.537	2.793	2.311	3.109	2.738	1.481	1.193	2.391	1.367	1.437	2.149	2.825	2.28	2.772	2.976	1.287	1.395	1.411	1.389	1.403	1.306	Unstable
Span	94.44	109.8	118.1	111.9	113.9	106.2	110.6	98.97	99.8	114.4	105.8	105.4	111	113.2	107	54.44	106	99.91	117	121.5	117.4	118.9	121.8	97.98	96.54	115.3	101.8	124.4	122.7	134.6	129.4	100.7	93.49	127.8	133.2	117.1	123	117	115.3	96.5	102.5	121.5	118.3	119.9	117.4	119.3	43288
log transform of IC50	3.87005	3.80543	2.84584	2.16791	2.68115	3.79532	2.70655	3.14114	3.03383	2.03181	3.11727	3.29003	3.78753	2.52969	3.53593	4.26776	3.14019	3.95847	2.17984	1.70902	3.05614	2.60076	1.73711	2.6067	3.7893	2.53681	2.79302	2.31091	3.10857	2.73823	1.50515	1.50515	2.39058	1.50515	1.50515	2.1486	2.82523	2.27944	2.77166	2.97603	1.50515	1.50515	1.50515	1.50515	1.50515

## Sheet: Normalized Neuts H5
Group-mouse	3mer-UR	3mer-LR	3mer-UL	3mer-LL	3mer-O	4mer-UR	4mer-LR	4mer-UL	4mer-LL	4mer-O	5mer-UR	5mer-LR	5mer-UL	5mer-LL	5mer-O	6mer-UR	6mer-LR	6mer-UL	6mer-LL	6mer-O	7mer-UR	7mer-LR	7mer-UL	7mer-LL	7mer-O	8mer-UR	8mer-LR	8mer-UL	8mer-LL	8mer-O	Mix-UR	Mix-LR	Mix-UL	Mix-LL	Mix-O	BOAS NP-UR	BOAS NP-LR	BOAS NP-UL	BOAS NP-LL	BOAS NP-O	NP-UR	NP-LR	NP-UL	NP-LL	NP-O	PB	H5.3
Dilution
32	6.71431	12.5502	14.1581	9.03677	5.7615	11.9845	82.6708	81.9562	-36.3167	-61.9934	48.0363	16.445	100	-29.1347	85.0728	88.6403	48.3724	33.7729	5.68841	35.1381	95.1242	33.9401	99.9721	99.9164	58.5301	6.16883	87.6033	13.9906	99.6163	99.9705	38.7249	7.9693	10.0435	12.5942	6.88406	58.8841	100.913	70.6232	51.8986	100.507	7.88745	8.1644	1.43459	-0.36557	6.36424	3.31782	99.3907
64	-1.50365	1.6823	4.68959	5.07667	3.14128	0.133988	81.4798	85.4399	-49.3663	-54.2482	-1.62729	-30.496	100	-42.7946	83.2421	86.1055	19.8978	9.78407	3.12515	9.31042	79.4381	14.437	100	93.9262	32.4085	-1.56434	63.1346	4.60449	98.0224	99.7639	11.3636	1.35773	-5.2029	0.884058	-2.68116	27.7536	100.855	36.1014	23.8116	96.8841	-8.97862	-8.81245	-2.99657	-0.559433	-0.531738	-3.41199	100.028
128	-10.7042	-1.325	-4.33229	-6.56543	-10.2873	-7.57779	81.9562	80.0208	-71.7572	-70.4428	-36.4106	-55.8442	99.4836	-60.8668	75.4029	76.905	5.82772	4.90829	4.54609	-0.0789413	44.9733	4.35106	100	88.2145	5.96222	-9.53365	16.1452	-9.59268	88.8725	96.9599	3.18772	-2.36128	-7	-12.8551	-5.89855	5.66667	100.913	12.8841	10.2754	80.5942	-8.75706	-6.37532	-8.5632	-8.97862	-12.4958	-6.18146	99.8615
256	-6.26768	-2.57555	-10.6744	-8.41149	-10.8531	-14.2177	80.4079	80.8843	-71.1	-68.7999	-60.2097	-61.1485	97.6529	-63.5425	79.299	72.164	-1.27699	1.342	-4.81542	3.32018	2.51219	-1.69492	99.8886	90.5828	-3.24675	-12.3967	-5.81464	-15.3483	60.7143	80.8737	-5.75561	-13.4298	-12.6812	-10.4203	-9.49275	-4.5942	100.594	-2.21739	-5.86957	49.9855	-10.1141	-6.54149	-14.4899	-12.7451	-12.8559	-13.1605	100.028
512	-14.575	-3.31993	-9.09632	-14.2177	-16.4508	-11.5379	81.4798	82.6708	-68.7999	-55.7033	-56.6422	-68.5182	92.4894	-66.4998	78.8296	73.4783	1.31414	-3.33875	-8.74391	-1.83422	3.54307	3.29231	98.7184	82.475	-8.73672	-7.5856	-6.22786	-11.2456	42.2668	63.6659	-3.54191	-8.05785	-8.10145	-11.1159	-4.94203	-6.53623	95.029	-6.24638	-10.1884	25.6667	-10.7234	-13.3821	-13.8252	-11.0003	-12.1912	-9.69868	99.9446
1024	-13.9795	-9.3643	-8.05419	-13.0564	-5.9997	-10.466	77.5197	80.2888	-53.9196	-40.3067	-43.7334	-63.7302	62.0247	-53.7318	71.5068	75.9193	-5.8463	-3.67309	-1.55561	2.09427	3.59879	0.11609	95.7929	85.3726	1.4758	-9.97639	-4.634	-12.9575	32.2314	38.9315	-4.634	-4.36836	-13.6957	-6.97101	-6.7971	-7.95652	86.8261	-1.78261	-9.78261	9.63768	-7.87083	-7.64927	-6.92921	-10.8619	-10.5295	-1.94417	100.028
2048	-5.4042	-3.76656	-3.31993	-6.56543	-11.5974	-8.85812	79.6933	79.2169	-39.3679	-51.6195	-34.7207	-50.2582	31.5131	-44.3905	69.1598	71.319	-1.16554	-0.106803	-0.58045	1.36986	5.01974	9.14326	91.8365	85.3726	-6.19835	-9.88784	-8.7072	-10.7733	22.0189	20.6907	-2.86305	7.31995	-11.3188	-8.04348	-1.34783	-3	61.1739	-5.81159	-3.46377	4.01449	-10.8342	-1.91647	-7.92622	-10.3357	-7.92622	-7.0123	99.9723
4096	-2.24803	-3.82611	-14.9323	-7.96487	-6.95251	-8.67947	81.2714	78.3832	-34.9554	-31.4818	-32.2328	-41.621	7.10374	-46.3621	78.7357	71.8354	-8.10309	0.534014	-3.33875	3.48735	2.87439	6.27351	87.9359	81.4442	0.236128	-2.89256	0.0295159	-4.19126	13.5183	9.59268	5.99174	10.4486	-5.52174	-7.31884	-10.7971	-8.62319	33	-7.28986	-1.86957	1.55072	-13.5205	-7.20616	-4.29822	-9.97563	-8.28625	-3.8828	99.6677
8192	-3.17106	-0.163764	-3.49859	1.50365	-2.33735	-8.29239	81.4203	78.9489	-31.3879	-20.4506	-18.3383	-19.0424	-6.60304	-36.1759	77.6561	75.5437	-0.74762	1.95496	-2.94869	3.29231	3.0137	2.54005	84.5647	83.8681	1.09209	-0.885478	1.94805	3.3353	8.85478	10.7438	-2.83353	-2.47934	-6.18841	-6.94203	-4.44928	-9.69565	19.5797	-2.62319	-1.28986	4.10145	-9.17248	-12.939	-3.3289	-7.23385	-7.62158	-6.20915	99.1969
16384	-4.9278	0.0148876	-0.967694	-4.06431	-0.104213	-2.2778	80.4972	75.7332	-19.7465	-12.987	-19.1832	-15.1463	-10.3583	-27.1632	73.8539	69.2536	-1.52775	-7.26724	12.9324	3.84955	7.38797	6.10634	75.0917	81.1934	1.88902	-2.00708	3.95514	4.48642	62.5443	1.41677	-4.8111	-4.66352	-5.34783	-5.57971	-9.05797	-0.884058	13.3188	-4.68116	-2.68116	1.78261	-1.63953	-0.808685	-7.0123	-4.24283	-5.57217	-0.504043	100.028
32768	-2.30758	-2.69466	-3.29016	-3.34971	-1.2059	-6.80363	16.7485	18.7733	0.344234	-2.8947	-7.5888	-2.14364	-11.8135	-30.0266	-11.391	-16.5076	5.82772	-2.08498	11.0657	-5.42837	4.65753	4.99187	26.6682	28.4514	0.974026	4.87013	-5.16529	-1.09209	-1.77096	3.24675	-9.59268	-18.2704	0.536232	-4.18841	-2.15942	0.275362	7.17391	-2.85507	-14.8841	-15.2029	1.40689	-3.52277	-4.10435	-5.21214	0.99147	4.81334	99.7231
Sigmoidal, 4PL, X is concentration																			Interrupted									Interrupted				Interrupted															Interrupted
Best-fit values
Bottom	-6.954	-3.242	-6.736	-7.047	-7.067	-8.858	-96533	-105339	-59.1	-69.49	-34.49	-44.19	-11.39	Unstable	-186298	-201739	-1.732	-1.692	1.332	1.02	3.37	3.765	-1640223	-146021	-1.991	Unstable	-3.43	-80.51	21.37	3.863	-3.473	-377.5	-7.727	-8.015	-6.136	-5.591	9.346	-4.774	-6.69	-1.396	-7.864	-6.915	-7.707	-8.887	-8.296	-5.454	-188
Top	= 100.0	= 100.0	= 100.0	= 100.0	= 100.0	= 100.0	= 100.0	= 100.0	= 100.0	= 100.0	= 100.0	= 100.0	= 100.0	= 100.0	= 100.0	= 100.0	= 100.0	= 100.0	= 100.0	= 100.0	= 100.0	= 100.0	= 100.0	= 100.0	= 100.0	= 100.0	= 100.0	= 100.0	= 100.0	= 100.0	= 100.0	= 100.0	= 100.0	= 100.0	= 100.0	= 100.0	= 100.0	= 100.0	= 100.0	= 100.0	= 100.0	= 100.0	= 100.0	= 100.0	= 100.0	= 100.0	= 100.0
IC50	13.8	12.51	13.46	10.48	10.62	15.08	Unstable	Unstable	63829	69723	38.86	61860	1586	1.718e-35	Unstable	Unstable	31.54	22.31	4.822e-145	25.21	108.3	22.62	Unstable	Unstable	40.85	9.569e-98	76.5	3.34e-27	286.6	714.1	26.47	1.306e+40	19	16.81	13.76	41.29	2434	51.77	36.58	280.9	116675	28.55	10.37	5.896	13.43	130512	2.09e+31
HillSlope	-2.253	-1.822	-1.573	-1.459	-1.716	-1.874	-0.3067	-0.3198	0.7576	0.4812	-2.775	1.167	-1.861	Unstable	-0.4358	-0.4442	-1.855	-1.791	-0.02753	-2.673	-2.898	-2.201	-1.159	-0.6001	-1.94	Unstable	-2.869	-0.004362	-1.916	-1.517	-1.978	-0.0152	-3.11	-2.193	-2.322	-1.89	-1.91	-1.937	-1.596	-1.764	1.804	-15.82	-2.069	-1.373	-2.081	1.594	-0.1127
logIC50	1.14	1.097	1.129	1.02	1.026	1.178	Unstable	Unstable	4.805	4.843	1.59	4.791	3.2	-34.76	Unstable	Unstable	1.499	1.349	-144.3	1.402	2.034	1.355	Unstable	Unstable	1.611	-97.02	1.884	-26.48	2.457	2.854	1.423	40.12	1.279	1.225	1.139	1.616	3.386	1.714	1.563	2.449	5.067	1.456	1.016	0.7706	1.128	5.116	31.32
Span	107	103.2	106.7	107	107.1	108.9	96633	105439	159.1	169.5	134.5	144.2	111.4	Unstable	186398	201839	101.7	101.7	98.67	98.98	96.63	96.24	1640323	146121	102	Unstable	103.4	180.5	78.63	96.14	103.5	477.5	107.7	108	106.1	105.6	90.65	104.8	106.7	101.4	107.9	106.9	107.7	108.9	108.3	105.5	288
** if was outside of min or max dilution, forced to limit of detection
IC50s	32	32	32	32	32	32	32	32768	32768	32	32	32	1376	32	32768	32	32	32	32768	32	108.3	32	32768	32768	39.69	32	74.24	32	284.1	714.1	32	32	32	32	32	38.8	2434	49.01	33.55	264.3	32	32	32	32	32
log transform of IC50	1.50515	1.50515	1.50515	1.50515	1.50515	1.50515	1.50515	4.51545	4.51545	1.50515	1.50515	1.50515	3.13862	1.50515	4.51545	1.50515	1.50515	1.50515	4.51545	1.50515	2.03463	1.50515	4.51545	4.51545	1.59868	1.50515	1.87064	1.50515	2.45347	2.85376	1.50515	1.50515	1.50515	1.50515	1.50515	1.58883	3.38632	1.69028	1.52569	2.4221	1.50515	1.50515	1.50515	1.50515	1.50515

## Sheet: Normalized Neuts H7
Group-mouse	3mer-UR	3mer-LR	3mer-UL	3mer-LL	3mer-O	4mer-UR	4mer-LR	4mer-UL	4mer-LL	4mer-O	5mer-UR	5mer-LR	5mer-UL	5mer-LL	5mer-O	6mer-UR	6mer-LR	6mer-UL	6mer-LL	6mer-O	7mer-UR	7mer-LR	7mer-UL	7mer-LL	7mer-O	8mer-UR	8mer-LR	8mer-UL	8mer-LL	8mer-O	Mix-UR	Mix-LR	Mix-UL	Mix-LL	Mix-O	BOAS NP-UR	BOAS NP-LR	BOAS NP-UL	BOAS NP-LL	BOAS NP-O	NP-UR	NP-LR	NP-UL	NP-LL	NP-O	PB	H7.167
Dilution
32	85.5202	84.8081	84.8081	87.9731	87.6566	85.6785	87.5775	85.8367	78.4971	86.6226	75.5244	78.7944	74.5334	82.9562	69.2816	100	99.8697	100	100	100	99.0879	81.5635	84.6906	89.1205	88.4244	95.9737	100	99.329	100	97.8191	83.0561	83.1399	85.9998	87.765	85.6954	98.9652	100	99.8783	89.3477	99.8783	92.3458	93.6596	89.6611	93.2026	87.9474	82.2925	99.7715
64	80.6937	76.6583	76.6583	75.7879	79.4277	80.4563	82.0388	80.2189	67.8943	81.4699	72.3534	71.6598	78.5962	74.2362	68.687	99.8018	98.6971	100	99.7394	99.9349	95.3094	84.8208	84.6254	83.4528	77.9393	91.4441	98.2385	96.8964	99.9161	94.2122	75.6745	67.4542	79.1823	76.8692	83.1998	92.9999	99.3304	97.6869	84.1737	99.5739	86.8621	86.6908	85.4912	85.3199	83.4349	81.4928	99.8286
128	75.155	64.7105	64.2358	67.7173	77.5287	69.2206	74.9967	72.7812	55.706	68.1916	66.8043	72.1552	73.6416	68.3898	63.3361	98.7118	97.1987	98.4365	99.7394	99.8046	91.3355	78.5016	65.7329	78.7622	69.8029	84.8176	93.5412	91.6958	98.574	89.0955	69.6351	63.7635	72.1213	73.5822	62.1386	82.7737	98.3565	90.626	67.3734	98.2348	73.0388	75.1523	73.3244	80.4646	72.182	71.7251	99.0861
256	73.9681	65.7392	62.4159	58.7762	49.756	61.7829	57.7476	60.5961	49.4633	59.967	55.706	68.2907	74.2362	61.7506	56.1024	99.0091	96.0912	96.5472	97.5896	97.1336	81.1726	55.6352	62.1498	56.5472	66.0282	79.1137	79.3653	85.0692	91.6119	76.5134	60.0727	53.2783	59.7038	56.4776	56.295	66.4604	89.2868	75.4692	57.7559	95.313	65.1561	67.3839	67.8408	74.7525	70.6969	71.8964	98.6862
512	56.9563	66.0557	53.8705	50.9429	50.1517	56.6399	65.4227	61.2291	29.6449	42.8241	50.4542	56.0033	53.8233	47.5805	50.7514	91.9736	84.2997	86.5798	93.0945	90.6189	61.9544	64.4951	66.3844	66.3844	65.7766	68.3769	66.7832	78.3587	83.6432	71.6483	64.9378	51.6007	48.321	34.9295	36.7556	47.5297	74.4344	62.6255	47.7123	87.0955	43.1645	45.735	49.6192	57.1592	45.1637	62.4714	94.4593
1024	58.0641	40.815	30.8453	49.3604	20.7174	20.5591	37.7291	54.8991	30.4377	32.4195	41.0405	52.0396	30.5367	33.2122	38.6623	78.1998	77.7199	78.7622	78.3062	82.6059	53.9414	58.5668	43.3876	53.0293	50.3425	43.2965	52.0201	49.8392	60.3243	34.1535	50.0909	43.7159	54.7733	35.0512	11.4335	23.7902	24.8859	23.4858	35.0512	64.269	24.4859	29.5126	40.5941	51.7327	35.9673	51.904	76.3519
2048	39.9446	28.7881	27.6012	37.1753	5.76289	34.0894	32.9817	36.7796	10.322	35.6895	40.0495	36.3832	27.564	27.4649	15.5739	51.4451	37.3941	47.101	52.443	73.4853	30.1629	23.7134	28.3388	23.127	41.0317	10.1636	33.818	17.1257	18.2161	29.7917	35.7472	37.0893	24.0337	10.1552	-25.3323	4.73775	7.65953	17.3988	26.225	31.6425	16.0891	2.2658	24.4859	46.8774	31.3404	29.5697	50.7616
4096	19.6888	14.3874	-5.47277	2.67704	5.36727	-20.8229	-8.87512	26.2561	-6.52353	-5.23534	14.3848	12.7002	-2.1635	27.0685	30.3386	59.4715	3.90879	42.2801	13.8111	44.1042	4.56026	30.0977	6.44951	7.557	18.3839	-0.90871	13.1833	15.5319	20.6487	22.4941	48.4971	43.7998	22.0858	4.49427	-27.4627	-30.6889	-23.4453	8.45085	-18.1495	2.54641	16.5461	-9.90099	11.1196	16.489	0.952018	10.6055	4.49353
8192	22.1416	18.7393	-7.2135	9.71911	-8.47949	2.83529	-5.94751	22.5373	-3.45169	2.79108	20.1321	-2.85714	26.6722	39.5541	51.4451	81.1726	25.0814	21.9544	26.1238	25.6026	4.29967	11.987	12.8339	-4.95114	24.0878	2.86593	25.2621	-18.1043	21.3197	15.6158	22.6618	13.5188	-3.11454	-12.2451	-15.8973	-24.2975	1.08552	13.2596	-1.958	13.3205	29.3412	0.380807	6.15004	18.7167	13.3473	6.43564	1.00914
16384	41.6062	27.9177	29.4211	13.6753	35.5928	34.8015	32.3487	20.7965	-8.20809	15.3757	30.1404	39.455	43.6168	64.1288	63.9306	80.3799	29.1857	24.8208	11.987	34.8534	29.1205	10.0326	26.8404	38.6971	14.8609	8.98924	21.9908	3.36922	-515.853	27.3592	15.8675	34.5729	25.4337	-37.202	-27.341	-24.7844	-17.2974	0.415948	6.80735	35.9034	5.57883	4.03656	-19.5545	10.1485	-9.21554	26.428	34.5963
32768	-5.23539	-15.8381	-3.17816	5.92114	-6.97613	3.62653	6.23764	25.2275	-12.5681	12.2048	11.7093	19.2403	32.2213	49.8596	64.327	70.0743	-28.1433	7.42671	-12.1173	-1.10749	-7.75244	-26.9055	-17.9805	14.5928	11.5057	10.0797	11.3379	1.52384	11.254	16.874	26.9397	36.7538	21.9641	-12.6103	-9.38419	-1.47104	-17.6626	22.8771	22.2684	55.9298	16.3747	-4.93145	-25.495	18.0883	-11.1577	24.0289	44.3069
Sigmoidal, 4PL, X is concentration
Best-fit values
Bottom	-15.31	-34.33	-2.636	-4.736	2.843	4.74	2.788	13.2	-21.16	4.492	7.32	9.27	23.11	40.49	45.09	68.95	3.469	11.63	1.115	-1.053	3.336	-255.7	-21.83	9.977	-4.648	2.697	15.43	-3.997	-252.3	18.78	4.4	29.13	10.87	-34.94	-25.13	-21.69	-14.07	10.31	2.164	26.82	14.27	-6.012	-53.1	6.07	-21	11.2	21.83
Top	= 100.0	= 100.0	= 100.0	= 100.0	= 100.0	= 100.0	= 100.0	= 100.0	= 100.0	= 100.0	= 100.0	= 100.0	= 100.0	= 100.0	= 100.0	= 100.0	= 100.0	= 100.0	= 100.0	= 100.0	= 100.0	= 100.0	= 100.0	= 100.0	= 100.0	= 100.0	= 100.0	= 100.0	= 100.0	= 100.0	= 100.0	= 100.0	= 100.0	= 100.0	= 100.0	= 100.0	= 100.0	= 100.0	= 100.0	= 100.0	= 100.0	= 100.0	= 100.0	= 100.0	= 100.0	= 100.0	= 100.0
IC50	1226	679.1	378.8	612.2	270.8	329.3	471.7	496.8	242.1	333.7	332.2	424.6	232.1	92.97	38.72	712.2	1380	2030	1830	4028	794	1781	603.4	459	1065	699.8	727.2	964.8	1027	549	823.5	118.1	355.9	367.5	272.2	449.7	712.9	504.7	335.3	980.2	279.2	429.2	659.2	807.4	673.5
HillSlope	-0.4765	-0.4381	-0.7513	-0.6068	-1.066	-0.9443	-0.8644	-0.6146	-0.6026	-0.8471	-0.5081	-0.6191	-0.9583	-1.193	-1.021	-4.008	-1.955	-1.3	-1.66	-1.106	-1.218	-0.3336	-0.5417	-0.8843	-0.5385	-1.54	-1.317	-1.6	Unstable	-1.483	-0.4464	-0.6846	-0.7499	-0.6798	-1.109	-1.316	-2.202	-1.833	-0.9596	-3.261	-1.234	-1.164	-0.5636	-0.7647	-0.6633	-0.78	-3.097
	3.08849	2.83193	2.57841	2.78689	2.43265	2.51759	2.67367	2.69618	2.38399	2.52336	2.5214	2.62798	2.36568	1.96834	1.58794	2.8526	3.13988	3.3075	3.26245	3.60509	2.89982	3.25066	2.78061	2.66181	3.02735	2.84497	2.86165	2.98444	3.01157	2.73957	2.91566	2.07225	2.55133	2.56526	2.43489	2.65292	2.85303	2.70303	2.52543	2.99131	2.44592	2.63266	2.81902	2.90709	2.82834
Span	115.3	134.3	102.6	104.7	97.16	95.26	97.21	86.8	121.2	95.51	92.68	90.73	76.89	59.51	54.91	31.05	96.53	88.37	98.88	101.1	96.66	355.7	121.8	90.02	104.6	97.3	84.57	104	352.3	81.22	95.6	70.87	89.13	134.9	125.1	121.7	114.1	89.69	97.84	73.18	85.73	106	153.1	93.93	121	88.8	78.17
** if was outside of min or max dilution, forced to limit of detection
IC50s	1226	679.1	378.8	612.2	270.8	329.3	471.7	496.8	242.1	333.7	332.2	424.6	232.1	92.97	38.72	712.2	1380	2030	1830	4028	794	1781	603.4	459	1065	699.8	727.2	964.8	1027	549	823.5	118.1	355.9	367.5	272.2	449.7	712.9	504.7	335.3	980.2	279.2	429.2	659.2	807.4	673.5
log transform of IC50	3.08849	2.83193	2.57841	2.78689	2.43265	2.51759	2.67367	2.69618	2.38399	2.52336	2.5214	2.62798	2.36568	1.96834	1.58794	2.8526	3.13988	3.3075	3.26245	3.60509	2.89982	3.25066	2.78061	2.66181	3.02735	2.84497	2.86165	2.98444	3.01157	2.73957	2.91566	2.07225	2.55133	2.56526	2.43489	2.65292	2.85303	2.70303	2.52543	2.99131	2.44592	2.63266	2.81902	2.90709	2.82834
