# Supplementary figures and images for: A modular platform to display multiple hemagglutinin subtypes on a single immunogen
Source: eLife journal article supplement (doi:10.7554/elife.97364), 2024-04-26

WT H3/B/H1 3-mer BoaS

2XGSS  
3XGSS  
4XGSS

250kD-

150kD-

100kD-

75kD-

50kD-

37kD-

25kD-

20kD-

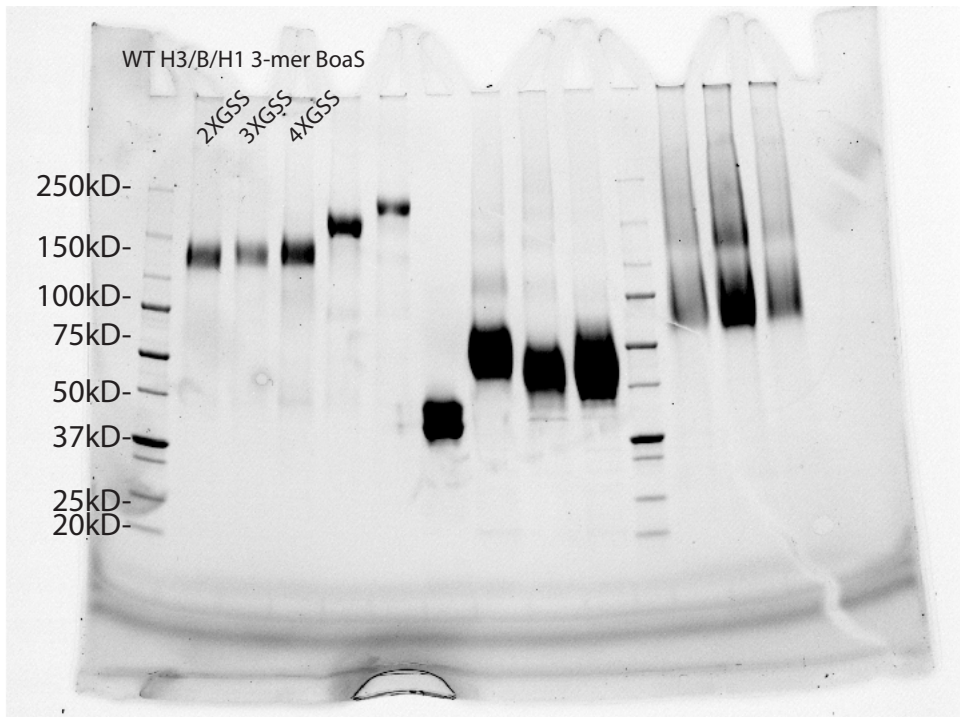

Supplement: fig1-figsupp1-data2 [file Figure 1- figure supplement 1 - source data 2.pdf › Figure 1- figure supplement 1 - source data 2.pdf]

WT H9/H5/H7 BoaS  
WT H5/H9/H7 BoaS

250kD-

150kD-

100kD-

75kD-

50kD-

37kD-

25kD-

20kD-

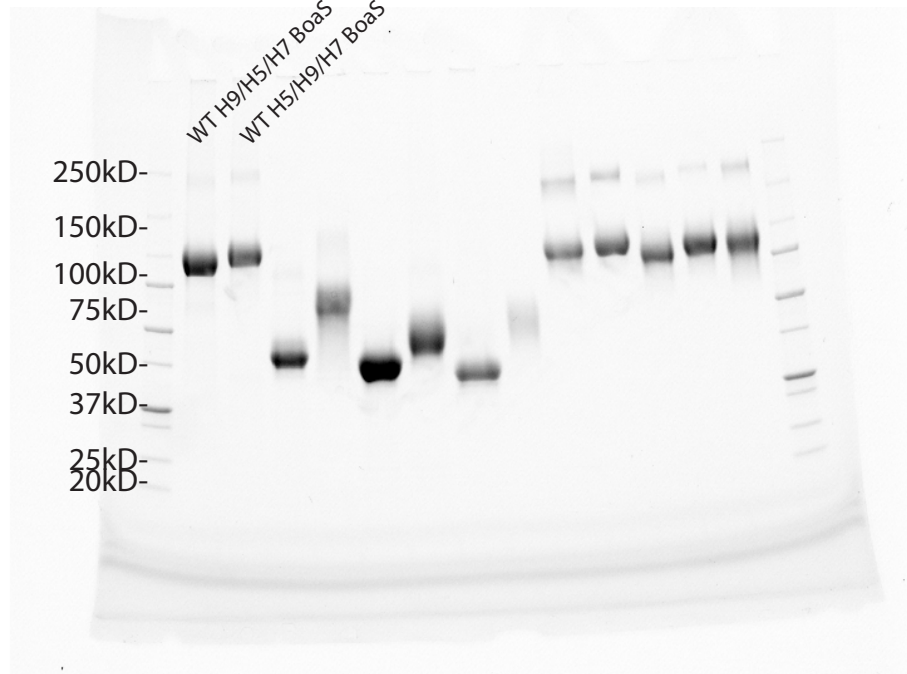

Supplement: fig1-figsupp2-data2 [file Figure 1- figure supplement 2- source data 2.pdf › Figure 1- figure supplement 2- source data 2.pdf]

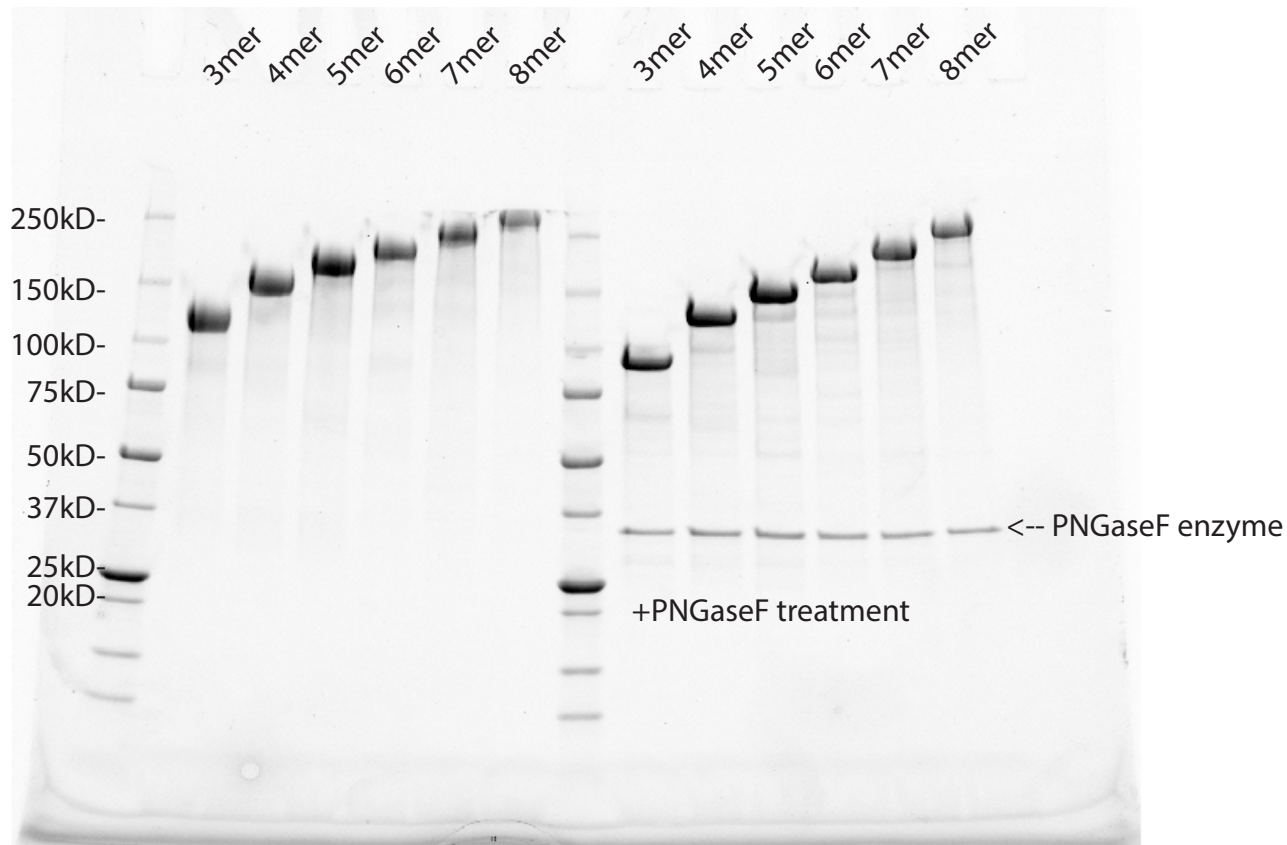

Supplement: fig2-data2 [file Figure 2 - source data 2.pdf › Figure 2 - source data 2.pdf]

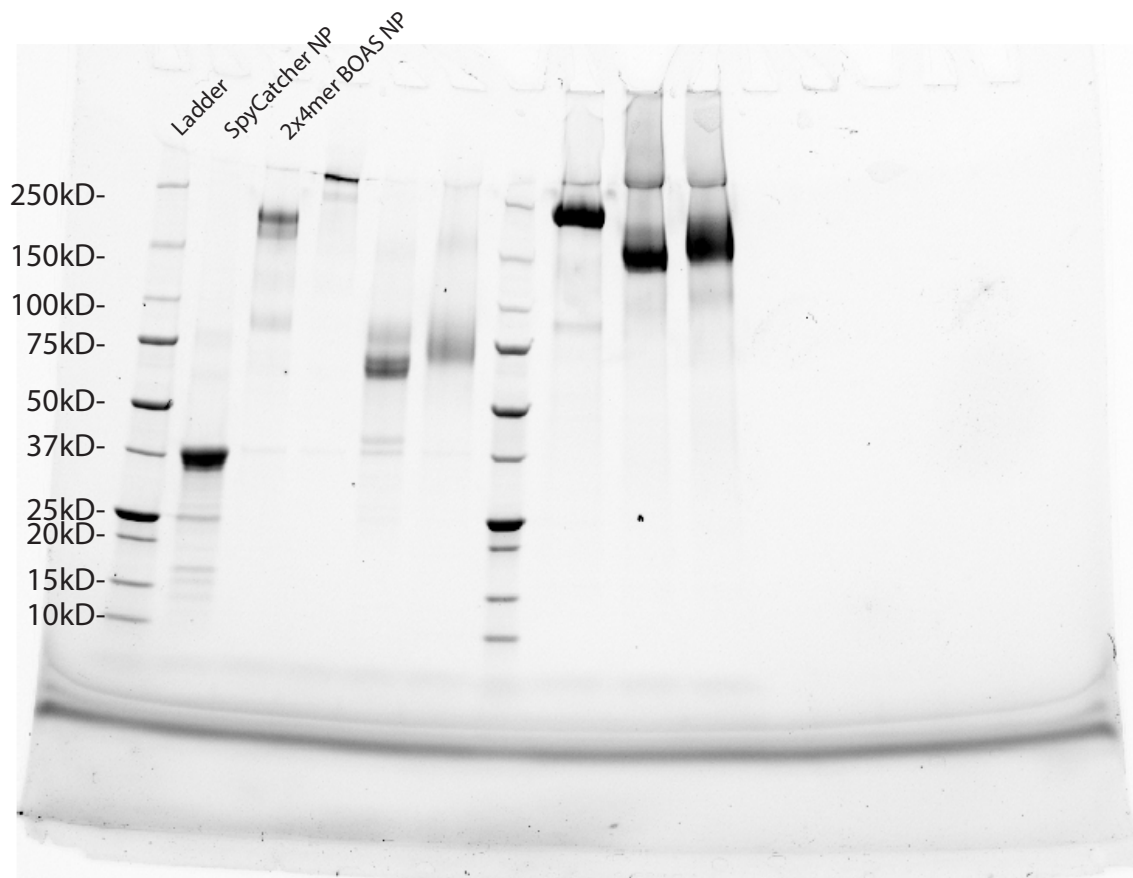

Supplement: fig5-figsupp1-data2 [file Figure 5- figure supplement 1 - source data 1.pdf › Figure 5- figure supplement 1 - source data 1.pdf]
